# Supplementary material
Source: publisher site journal article supplement (https://www.spandidos-publications.com/2110/downloadSupplementary)
Supplement: Supplementary file 1 [file downloadSupplementary]

## Sheet: Sheet1
Table SVII. The total interrelations related to circRNA-miRNA-mRNA ceRNA networks.
mRNA	GeneID	circRNA	CeRNA_Score	Pvalue	Shared_miRNA_Nunber	Shared_miRNA
KALRN	8997	hsa_circ_0008221	0.399038	1.08527e-60	34	hsa-miR-30d-5p;hsa-miR-181a-5p;NC_000010.11_22861;hsa-miR-499a-5p;hsa-miR-21-5p;hsa-miR-155-5p;hsa-miR-27a-3p;hsa-miR-22-3p;hsa-miR-449c-5p;hsa-miR-3929;hsa-miR-9-5p;NC_000019.10_34428;hsa-miR-203a-3p;NC_000016.10_31515;hsa-miR-22-5p;NC_000011.10_24785;NC_000020.11_34751;hsa-miR-328-3p;hsa-miR-659-5p;hsa-miR-181c-5p;hsa-miR-369-3p;hsa-miR-664a-5p;NC_000017.11_32431;hsa-miR-6511b-5p;hsa-miR-193a-5…
FIGN	55137	hsa_circ_0008221	0.240385	4.22945e-58	30	hsa-miR-30d-5p;hsa-miR-215-5p;hsa-miR-181a-5p;hsa-miR-499a-5p;hsa-miR-21-5p;hsa-miR-155-5p;hsa-miR-27a-3p;hsa-miR-22-3p;hsa-miR-9-5p;hsa-miR-3929;hsa-miR-203a-3p;NC_000016.10_31515;hsa-miR-22-5p;NC_000011.10_24785;NC_000020.11_34751;hsa-miR-328-3p;hsa-miR-659-5p;hsa-miR-181c-5p;hsa-miR-369-3p;hsa-miR-664a-5p;NC_000017.11_32431;hsa-miR-6511b-5p;hsa-miR-193a-5p;NC_000003.12_9115;hsa-miR-24-3p;hsa-m…
PRICKLE2	166336	hsa_circ_0008221	0.254808	6.03794e-58	32	hsa-miR-215-5p;hsa-miR-181a-5p;NC_000010.11_22861;hsa-miR-499a-5p;hsa-miR-21-5p;hsa-miR-155-5p;hsa-miR-27a-3p;hsa-miR-22-3p;hsa-miR-449c-5p;hsa-miR-3929;hsa-miR-9-5p;NC_000019.10_34428;hsa-miR-203a-3p;hsa-miR-22-5p;NC_000011.10_24785;NC_000020.11_34751;hsa-miR-328-3p;hsa-miR-659-5p;hsa-miR-181c-5p;hsa-miR-369-3p;hsa-miR-664a-5p;NC_000017.11_32431;hsa-miR-6511b-5p;hsa-miR-193a-5p;NC_000014.9_29046…
MYT1L	23040	hsa_circ_0008221	0.137019	9.67841e-58	31	hsa-miR-30d-5p;hsa-miR-215-5p;NC_000016.10_31213;hsa-miR-181a-5p;NC_000010.11_22861;hsa-miR-499a-5p;hsa-miR-155-5p;hsa-miR-27a-3p;hsa-miR-22-3p;hsa-miR-449c-5p;hsa-miR-3929;hsa-miR-9-5p;NC_000019.10_34428;hsa-miR-203a-3p;hsa-miR-22-5p;NC_000011.10_24785;NC_000020.11_34751;hsa-miR-659-5p;hsa-miR-181c-5p;hsa-miR-664a-5p;NC_000017.11_32431;hsa-miR-6511b-5p;hsa-miR-193a-5p;NC_000014.9_29046;NC_000003…
RGS3	5998	hsa_circ_0008221	0.192308	6.19252e-57	32	hsa-miR-30d-5p;hsa-miR-215-5p;hsa-miR-181a-5p;NC_000010.11_22861;hsa-miR-499a-5p;hsa-miR-21-5p;hsa-miR-155-5p;hsa-miR-27a-3p;hsa-miR-22-3p;hsa-miR-449c-5p;hsa-miR-3929;hsa-miR-9-5p;NC_000019.10_34428;hsa-miR-203a-3p;hsa-miR-22-5p;NC_000011.10_24785;NC_000020.11_34751;hsa-miR-328-3p;hsa-miR-659-5p;hsa-miR-181c-5p;NC_000017.11_32431;hsa-miR-6511b-5p;hsa-miR-193a-5p;NC_000014.9_29046;NC_000003.12_91…
PSD3	23362	hsa_circ_0008221	0.153846	2.60466e-52	29	hsa-miR-30d-5p;hsa-miR-215-5p;hsa-miR-181a-5p;NC_000010.11_22861;hsa-miR-499a-5p;hsa-miR-21-5p;hsa-miR-155-5p;hsa-miR-27a-3p;hsa-miR-22-3p;hsa-miR-9-5p;hsa-miR-3929;NC_000019.10_34428;hsa-miR-203a-3p;hsa-miR-22-5p;NC_000011.10_24785;NC_000020.11_34751;hsa-miR-328-3p;hsa-miR-181c-5p;hsa-miR-664a-5p;NC_000017.11_32431;hsa-miR-6511b-5p;hsa-miR-193a-5p;NC_000014.9_29046;hsa-miR-6842-3p;NC_000002.12_3…
COL28A1	340267	hsa_circ_0008221	0.132212	3.21649e-51	29	hsa-miR-30d-5p;hsa-miR-215-5p;hsa-miR-181a-5p;NC_000010.11_22861;hsa-miR-21-5p;hsa-miR-155-5p;hsa-miR-27a-3p;hsa-miR-22-3p;hsa-miR-9-5p;hsa-miR-3929;hsa-miR-203a-3p;hsa-miR-22-5p;NC_000011.10_24785;NC_000020.11_34751;hsa-miR-328-3p;hsa-miR-659-5p;hsa-miR-181c-5p;hsa-miR-369-3p;hsa-miR-664a-5p;hsa-miR-6511b-5p;hsa-miR-193a-5p;NC_000014.9_29046;NC_000003.12_9115;hsa-miR-24-3p;NC_000002.12_3880;hsa-…
CNTNAP2	26047	hsa_circ_0008221	0.132212	3.33099e-50	27	NC_000016.10_31213;hsa-miR-181a-5p;NC_000010.11_22861;hsa-miR-499a-5p;hsa-miR-155-5p;hsa-miR-27a-3p;hsa-miR-9-5p;hsa-miR-449c-5p;hsa-miR-3929;NC_000019.10_34428;hsa-miR-22-5p;NC_000011.10_24785;hsa-miR-328-3p;hsa-miR-659-5p;hsa-miR-181c-5p;hsa-miR-369-3p;hsa-miR-664a-5p;NC_000017.11_32431;hsa-miR-6511b-5p;hsa-miR-193a-5p;NC_000014.9_29046;hsa-miR-6842-3p;NC_000002.12_3880;hsa-miR-98-5p;NC_000011.…
AUTS2	26053	hsa_circ_0059713	0.95122	5.77424e-50	33	hsa-miR-573;hsa-miR-548i;hsa-miR-582-5p;hsa-miR-3529-3p;hsa-miR-34c-5p;NC_000006.12_16700;NC_000023.11_36905;hsa-miR-302a-5p;NC_000021.9_35751;hsa-miR-7974;NC_000003.12_9133;hsa-miR-373-5p;NC_000018.10_33504*;NC_000009.12_21925;hsa-miR-526b-5p;NC_000002.12_3238;NC_000006.12_15769;NC_000018.10_33037;hsa-miR-3662;NC_000005.10_11919>NC_000005.10_11920;NC_000009.12_21957;NC_000001.11_2997;NC_000010.1…
FRMD4B	23150	hsa_circ_0008221	0.110577	1.93133e-49	26	hsa-miR-30d-5p;hsa-miR-215-5p;NC_000016.10_31213;NC_000010.11_22861;hsa-miR-21-5p;hsa-miR-155-5p;hsa-miR-27a-3p;hsa-miR-22-3p;hsa-miR-9-5p;hsa-miR-3929;NC_000019.10_34428;hsa-miR-203a-3p;NC_000016.10_31515;hsa-miR-22-5p;NC_000020.11_34751;hsa-miR-369-3p;NC_000017.11_32431;hsa-miR-6511b-5p;NC_000003.12_9115;hsa-miR-24-3p;hsa-miR-6842-3p;NC_000002.12_3880;hsa-miR-98-5p;NC_000011.10_23882;hsa-miR-44…
PLEKHA6	22874	hsa_circ_0008221	0.175481	7.01754e-49	29	hsa-miR-30d-5p;hsa-miR-181a-5p;NC_000010.11_22861;hsa-miR-21-5p;hsa-miR-155-5p;hsa-miR-27a-3p;hsa-miR-22-3p;hsa-miR-9-5p;hsa-miR-3929;hsa-miR-203a-3p;NC_000016.10_31515;hsa-miR-22-5p;NC_000011.10_24785;NC_000020.11_34751;hsa-miR-328-3p;hsa-miR-659-5p;hsa-miR-181c-5p;hsa-miR-369-3p;hsa-miR-664a-5p;NC_000017.11_32431;hsa-miR-6511b-5p;hsa-miR-193a-5p;NC_000014.9_29046;hsa-miR-24-3p;hsa-miR-6842-3p;N…
RTKN2	219790	hsa_circ_0008221	0.122596	1.19247e-48	26	hsa-miR-30d-5p;hsa-miR-215-5p;hsa-miR-181a-5p;NC_000010.11_22861;hsa-miR-21-5p;hsa-miR-155-5p;hsa-miR-27a-3p;hsa-miR-9-5p;hsa-miR-3929;hsa-miR-203a-3p;hsa-miR-22-5p;NC_000011.10_24785;hsa-miR-328-3p;hsa-miR-181c-5p;hsa-miR-369-3p;hsa-miR-664a-5p;NC_000017.11_32431;hsa-miR-6511b-5p;hsa-miR-193a-5p;NC_000014.9_29046;NC_000003.12_9115;hsa-miR-6842-3p;NC_000002.12_3880;hsa-miR-98-5p;NC_000011.10_2388…
FIGNL1	63979	hsa_circ_0008221	0.132212	6.33349e-48	26	hsa-miR-181a-5p;hsa-miR-499a-5p;hsa-miR-21-5p;hsa-miR-155-5p;hsa-miR-27a-3p;hsa-miR-22-3p;hsa-miR-449c-5p;hsa-miR-3929;hsa-miR-203a-3p;hsa-miR-22-5p;NC_000011.10_24785;NC_000020.11_34751;hsa-miR-328-3p;hsa-miR-659-5p;hsa-miR-181c-5p;hsa-miR-369-3p;NC_000017.11_32431;hsa-miR-6511b-5p;hsa-miR-193a-5p;hsa-miR-6842-3p;NC_000002.12_3880;hsa-miR-98-5p;NC_000004.12_10963;NC_000011.10_23882;hsa-miR-4443;…
HELLS	3070	hsa_circ_0008221	0.185096	1.03186e-47	27	hsa-miR-30d-5p;hsa-miR-181a-5p;NC_000010.11_22861;hsa-miR-499a-5p;hsa-miR-27a-3p;hsa-miR-9-5p;hsa-miR-3929;hsa-miR-203a-3p;NC_000016.10_31515;NC_000011.10_24785;NC_000020.11_34751;hsa-miR-328-3p;hsa-miR-659-5p;hsa-miR-181c-5p;hsa-miR-369-3p;hsa-miR-664a-5p;NC_000017.11_32431;hsa-miR-6511b-5p;hsa-miR-193a-5p;NC_000003.12_9115;hsa-miR-24-3p;hsa-miR-6842-3p;NC_000002.12_3880;hsa-miR-98-5p;NC_000004.…
HEG1	57493	hsa_circ_0008221	0.151442	1.03186e-47	27	hsa-miR-215-5p;hsa-miR-181a-5p;hsa-miR-155-5p;hsa-miR-27a-3p;hsa-miR-9-5p;hsa-miR-22-3p;hsa-miR-3929;hsa-miR-203a-3p;hsa-miR-22-5p;NC_000016.10_31515;NC_000011.10_24785;NC_000020.11_34751;hsa-miR-328-3p;hsa-miR-659-5p;hsa-miR-181c-5p;hsa-miR-369-3p;hsa-miR-664a-5p;NC_000017.11_32431;hsa-miR-6511b-5p;NC_000014.9_29046;NC_000003.12_9115;hsa-miR-24-3p;hsa-miR-6842-3p;NC_000002.12_3880;hsa-miR-98-5p;…
ITPR1	3708	hsa_circ_0059713	0.829268	2.95262e-47	31	hsa-miR-573;hsa-miR-548i;hsa-miR-582-5p;hsa-miR-3529-3p;hsa-miR-34c-5p;NC_000006.12_16700;NC_000023.11_36905;hsa-miR-302a-5p;hsa-miR-7974;NC_000003.12_9133;NC_000018.10_33504*;NC_000009.12_21925;hsa-miR-526b-5p;NC_000002.12_3238;NC_000006.12_15769;NC_000018.10_33037;hsa-miR-3662;NC_000005.10_11919>NC_000005.10_11920;hsa-miR-92a-3p;NC_000001.11_2997;NC_000010.11_23646;NC_000016.10_31157;hsa-miR-20…
PRSS37	136242	hsa_circ_0008221	0.108173	2.97341e-47	26	hsa-miR-30d-5p;hsa-miR-215-5p;hsa-miR-181a-5p;hsa-miR-499a-5p;hsa-miR-21-5p;hsa-miR-155-5p;hsa-miR-22-3p;hsa-miR-9-5p;hsa-miR-203a-3p;hsa-miR-22-5p;hsa-miR-328-3p;hsa-miR-659-5p;hsa-miR-181c-5p;hsa-miR-664a-5p;NC_000017.11_32431;hsa-miR-6511b-5p;hsa-miR-193a-5p;NC_000014.9_29046;NC_000003.12_9115;hsa-miR-24-3p;hsa-miR-6842-3p;NC_000002.12_3880;hsa-miR-98-5p;NC_000011.10_23882;hsa-miR-4443;NC_0000…
SYNPO	11346	hsa_circ_0008221	0.146635	3.55115e-47	27	hsa-miR-30d-5p;hsa-miR-215-5p;hsa-miR-181a-5p;NC_000010.11_22861;hsa-miR-155-5p;hsa-miR-9-5p;hsa-miR-449c-5p;hsa-miR-3929;hsa-miR-203a-3p;NC_000016.10_31515;hsa-miR-22-5p;NC_000011.10_24785;NC_000020.11_34751;hsa-miR-328-3p;hsa-miR-659-5p;hsa-miR-181c-5p;hsa-miR-664a-5p;NC_000017.11_32431;hsa-miR-6511b-5p;hsa-miR-193a-5p;NC_000014.9_29046;NC_000003.12_9115;hsa-miR-24-3p;hsa-miR-6842-3p;NC_000002.…
ZNF519	162655	hsa_circ_0008221	0.127404	3.56973e-47	25	hsa-miR-30d-5p;hsa-miR-215-5p;hsa-miR-181a-5p;hsa-miR-499a-5p;hsa-miR-21-5p;hsa-miR-155-5p;hsa-miR-22-3p;hsa-miR-9-5p;hsa-miR-3929;hsa-miR-203a-3p;hsa-miR-22-5p;NC_000011.10_24785;hsa-miR-659-5p;hsa-miR-181c-5p;hsa-miR-369-3p;hsa-miR-664a-5p;NC_000017.11_32431;hsa-miR-6511b-5p;NC_000014.9_29046;NC_000003.12_9115;hsa-miR-24-3p;hsa-miR-98-5p;NC_000004.12_10963;hsa-miR-4443;NC_000009.12_21531
PPARGC1A	10891	hsa_circ_0008221	0.103365	3.56973e-47	25	hsa-miR-30d-5p;hsa-miR-215-5p;NC_000016.10_31213;NC_000010.11_22861;hsa-miR-499a-5p;hsa-miR-22-3p;hsa-miR-9-5p;hsa-miR-3929;NC_000019.10_34428;hsa-miR-203a-3p;NC_000016.10_31515;hsa-miR-22-5p;NC_000011.10_24785;NC_000020.11_34751;hsa-miR-328-3p;hsa-miR-659-5p;NC_000017.11_32431;hsa-miR-193a-5p;NC_000003.12_9115;hsa-miR-24-3p;hsa-miR-6842-3p;NC_000002.12_3880;hsa-miR-98-5p;NC_000011.10_23882;hsa-m…
NAV2	89797	hsa_circ_0008221	0.180288	1.25042e-46	28	hsa-miR-30d-5p;hsa-miR-181a-5p;NC_000010.11_22861;hsa-miR-499a-5p;hsa-miR-21-5p;hsa-miR-155-5p;hsa-miR-27a-3p;hsa-miR-22-3p;hsa-miR-449c-5p;hsa-miR-3929;hsa-miR-9-5p;NC_000019.10_34428;hsa-miR-22-5p;NC_000011.10_24785;NC_000020.11_34751;hsa-miR-328-3p;hsa-miR-181c-5p;hsa-miR-664a-5p;NC_000017.11_32431;hsa-miR-6511b-5p;hsa-miR-193a-5p;NC_000003.12_9115;hsa-miR-24-3p;hsa-miR-6842-3p;NC_000002.12_38…
ROR1	4919	hsa_circ_0008221	0.132212	2.13218e-46	25	hsa-miR-30d-5p;hsa-miR-215-5p;hsa-miR-181a-5p;NC_000010.11_22861;hsa-miR-499a-5p;hsa-miR-21-5p;hsa-miR-155-5p;hsa-miR-27a-3p;hsa-miR-22-3p;hsa-miR-9-5p;hsa-miR-3929;hsa-miR-203a-3p;hsa-miR-22-5p;NC_000011.10_24785;hsa-miR-328-3p;hsa-miR-659-5p;hsa-miR-181c-5p;hsa-miR-369-3p;hsa-miR-664a-5p;NC_000014.9_29046;NC_000003.12_9115;hsa-miR-6842-3p;NC_000002.12_3880;hsa-miR-98-5p;hsa-miR-4443
RGS3	5998	hsa_circ_0052203	0.916667	1.36611e-45	24	NC_000024.10_38844;NC_000010.11_22861;hsa-miR-26b-5p;hsa-miR-22-3p;hsa-miR-449c-5p;hsa-miR-3929;hsa-miR-22-5p;NC_000011.10_24785;NC_000020.11_34751;hsa-miR-181c-5p;hsa-miR-4435;NC_000017.11_32431;NC_000017.11_32431*;hsa-miR-6511b-5p;NC_000010.11_22289;NC_000014.9_29046;hsa-miR-6842-3p;hsa-miR-6807-5p;NC_000002.12_3880;hsa-miR-98-5p;hsa-miR-148a-3p;hsa-miR-642a-5p;hsa-miR-4443;NC_000009.12_21531
RFC3	5983	hsa_circ_0008221	0.163462	1.74726e-45	26	hsa-miR-215-5p;hsa-miR-181a-5p;NC_000010.11_22861;hsa-miR-499a-5p;hsa-miR-21-5p;hsa-miR-155-5p;hsa-miR-27a-3p;hsa-miR-9-5p;hsa-miR-449c-5p;hsa-miR-3929;hsa-miR-203a-3p;hsa-miR-22-5p;NC_000011.10_24785;hsa-miR-328-3p;hsa-miR-659-5p;hsa-miR-369-3p;hsa-miR-664a-5p;NC_000017.11_32431;hsa-miR-6511b-5p;hsa-miR-193a-5p;NC_000014.9_29046;hsa-miR-24-3p;hsa-miR-6842-3p;hsa-miR-98-5p;hsa-miR-4443;NC_000009.…
SMC1A	8243	hsa_circ_0008221	0.125	2.86813e-45	27	hsa-miR-30d-5p;hsa-miR-181a-5p;hsa-miR-21-5p;hsa-miR-27a-3p;hsa-miR-22-3p;hsa-miR-9-5p;hsa-miR-3929;NC_000019.10_34428;hsa-miR-203a-3p;hsa-miR-22-5p;NC_000011.10_24785;NC_000020.11_34751;hsa-miR-328-3p;hsa-miR-659-5p;hsa-miR-181c-5p;hsa-miR-664a-5p;NC_000017.11_32431;hsa-miR-6511b-5p;hsa-miR-193a-5p;NC_000014.9_29046;hsa-miR-24-3p;hsa-miR-6842-3p;NC_000002.12_3880;hsa-miR-98-5p;NC_000011.10_23882…
POLQ	10721	hsa_circ_0008221	0.108173	6.06057e-45	24	hsa-miR-30d-5p;hsa-miR-181a-5p;hsa-miR-499a-5p;hsa-miR-155-5p;hsa-miR-27a-3p;hsa-miR-22-3p;hsa-miR-9-5p;hsa-miR-203a-3p;hsa-miR-22-5p;NC_000020.11_34751;hsa-miR-328-3p;hsa-miR-181c-5p;hsa-miR-664a-5p;NC_000017.11_32431;hsa-miR-6511b-5p;hsa-miR-193a-5p;NC_000014.9_29046;hsa-miR-24-3p;hsa-miR-6842-3p;NC_000002.12_3880;hsa-miR-98-5p;NC_000004.12_10963;NC_000011.10_23882;NC_000009.12_21531
IQGAP3	128239	hsa_circ_0008221	0.110577	1.84568e-44	26	hsa-miR-215-5p;hsa-miR-181a-5p;hsa-miR-499a-5p;hsa-miR-21-5p;hsa-miR-27a-3p;hsa-miR-22-3p;hsa-miR-449c-5p;hsa-miR-3929;hsa-miR-9-5p;NC_000019.10_34428;hsa-miR-22-5p;NC_000016.10_31515;NC_000011.10_24785;NC_000020.11_34751;hsa-miR-328-3p;hsa-miR-181c-5p;hsa-miR-664a-5p;hsa-miR-6511b-5p;hsa-miR-193a-5p;NC_000014.9_29046;hsa-miR-24-3p;hsa-miR-6842-3p;NC_000002.12_3880;hsa-miR-98-5p;hsa-miR-4443;NC_0…
RGS3	5998	hsa_circ_0059354	0.711111	3.38588e-44	24	hsa-miR-30d-5p;NC_000024.10_38844;hsa-miR-181a-5p;NC_000010.11_22861;hsa-miR-27a-3p;hsa-miR-22-3p;hsa-miR-449c-5p;hsa-miR-3929;hsa-miR-9-5p;hsa-miR-22-5p;hsa-miR-215-3p;NC_000011.10_24785;hsa-miR-181c-5p;NC_000017.11_32431;hsa-miR-6511b-5p;hsa-miR-193a-5p;NC_000014.9_29046;hsa-miR-24-3p;hsa-miR-6842-3p;NC_000002.12_3880;hsa-miR-98-5p;hsa-miR-4758-3p;hsa-miR-148a-3p;hsa-miR-4443
JADE2	23338	hsa_circ_0008221	0.127404	3.498e-44	24	hsa-miR-30d-5p;NC_000016.10_31213;hsa-miR-181a-5p;hsa-miR-27a-3p;hsa-miR-22-3p;hsa-miR-449c-5p;hsa-miR-3929;hsa-miR-9-5p;NC_000019.10_34428;NC_000016.10_31515;hsa-miR-22-5p;NC_000011.10_24785;NC_000020.11_34751;hsa-miR-328-3p;hsa-miR-181c-5p;NC_000017.11_32431;hsa-miR-6511b-5p;hsa-miR-193a-5p;NC_000014.9_29046;NC_000003.12_9115;hsa-miR-24-3p;hsa-miR-6842-3p;NC_000002.12_3880;hsa-miR-4443
PLCE1	51196	hsa_circ_0008221	0.132212	7.70707e-44	25	hsa-miR-30d-5p;hsa-miR-181a-5p;NC_000010.11_22861;hsa-miR-499a-5p;hsa-miR-155-5p;hsa-miR-27a-3p;hsa-miR-22-3p;hsa-miR-9-5p;hsa-miR-3929;hsa-miR-203a-3p;hsa-miR-22-5p;NC_000011.10_24785;NC_000020.11_34751;hsa-miR-328-3p;hsa-miR-659-5p;hsa-miR-181c-5p;hsa-miR-664a-5p;NC_000017.11_32431;hsa-miR-6511b-5p;NC_000003.12_9115;hsa-miR-24-3p;hsa-miR-6842-3p;NC_000002.12_3880;hsa-miR-98-5p;NC_000009.12_21531
CLSPN	63967	hsa_circ_0008221	0.149038	7.70707e-44	25	hsa-miR-215-5p;hsa-miR-181a-5p;NC_000010.11_22861;hsa-miR-155-5p;hsa-miR-27a-3p;hsa-miR-22-3p;hsa-miR-9-5p;hsa-miR-3929;hsa-miR-203a-3p;hsa-miR-22-5p;NC_000011.10_24785;NC_000020.11_34751;hsa-miR-181c-5p;hsa-miR-369-3p;hsa-miR-664a-5p;NC_000017.11_32431;hsa-miR-6511b-5p;hsa-miR-193a-5p;hsa-miR-24-3p;hsa-miR-6842-3p;NC_000002.12_3880;hsa-miR-98-5p;NC_000011.10_23882;hsa-miR-4443;NC_000009.12_21531
ADAM20	8748	hsa_circ_0059713	0.804878	2.1019e-43	30	hsa-miR-573;hsa-miR-548i;hsa-miR-582-5p;hsa-miR-3529-3p;hsa-miR-34c-5p;NC_000006.12_16700;NC_000023.11_36905;NC_000021.9_35751;hsa-miR-7974;NC_000003.12_9133;hsa-miR-373-5p;NC_000002.12_3238;NC_000006.12_15769;NC_000018.10_33037;hsa-miR-3662;NC_000005.10_11919>NC_000005.10_11920;hsa-miR-92a-3p;NC_000009.12_21957;NC_000001.11_2997;NC_000010.11_23646;NC_000016.10_31157;hsa-miR-205-5p;NC_000022.11_3…
INCENP	3619	hsa_circ_0008221	0.108173	2.68529e-43	25	hsa-miR-30d-5p;hsa-miR-215-5p;hsa-miR-181a-5p;NC_000010.11_22861;hsa-miR-499a-5p;hsa-miR-155-5p;hsa-miR-22-3p;hsa-miR-449c-5p;hsa-miR-9-5p;hsa-miR-203a-3p;hsa-miR-22-5p;NC_000020.11_34751;hsa-miR-328-3p;hsa-miR-181c-5p;hsa-miR-369-3p;hsa-miR-6511b-5p;hsa-miR-193a-5p;NC_000014.9_29046;NC_000003.12_9115;hsa-miR-24-3p;hsa-miR-6842-3p;NC_000002.12_3880;NC_000011.10_23882;hsa-miR-4443;NC_000009.12_215…
MAP3K1	4214	hsa_circ_0008221	0.103365	2.68529e-43	25	hsa-miR-215-5p;hsa-miR-181a-5p;hsa-miR-499a-5p;hsa-miR-21-5p;hsa-miR-155-5p;hsa-miR-27a-3p;hsa-miR-22-3p;hsa-miR-9-5p;hsa-miR-3929;hsa-miR-203a-3p;hsa-miR-22-5p;NC_000011.10_24785;hsa-miR-328-3p;hsa-miR-659-5p;hsa-miR-181c-5p;hsa-miR-369-3p;NC_000017.11_32431;hsa-miR-193a-5p;NC_000014.9_29046;hsa-miR-24-3p;hsa-miR-6842-3p;hsa-miR-98-5p;NC_000011.10_23882;hsa-miR-4443;NC_000009.12_21531
BCOR	54880	hsa_circ_0008221	0.115385	7.6702e-43	24	hsa-miR-30d-5p;hsa-miR-181a-5p;hsa-miR-21-5p;hsa-miR-27a-3p;hsa-miR-9-5p;hsa-miR-22-3p;hsa-miR-3929;NC_000019.10_34428;hsa-miR-203a-3p;hsa-miR-22-5p;NC_000011.10_24785;NC_000020.11_34751;hsa-miR-659-5p;hsa-miR-369-3p;NC_000017.11_32431;hsa-miR-6511b-5p;hsa-miR-193a-5p;NC_000003.12_9115;hsa-miR-24-3p;hsa-miR-6842-3p;NC_000002.12_3880;hsa-miR-98-5p;hsa-miR-4443;NC_000009.12_21531
CCNF	899	hsa_circ_0008221	0.115385	7.6702e-43	24	hsa-miR-30d-5p;hsa-miR-181a-5p;hsa-miR-27a-3p;hsa-miR-22-3p;hsa-miR-449c-5p;hsa-miR-3929;hsa-miR-9-5p;NC_000019.10_34428;NC_000016.10_31515;hsa-miR-22-5p;NC_000011.10_24785;NC_000020.11_34751;hsa-miR-181c-5p;hsa-miR-664a-5p;NC_000017.11_32431;hsa-miR-6511b-5p;hsa-miR-193a-5p;NC_000003.12_9115;hsa-miR-24-3p;hsa-miR-6842-3p;NC_000002.12_3880;hsa-miR-98-5p;hsa-miR-4443;NC_000009.12_21531
ANK1	286	hsa_circ_0008221	0.137019	8.74852e-43	25	hsa-miR-181a-5p;hsa-miR-21-5p;hsa-miR-27a-3p;hsa-miR-22-3p;hsa-miR-449c-5p;hsa-miR-3929;hsa-miR-9-5p;NC_000019.10_34428;hsa-miR-22-5p;NC_000016.10_31515;NC_000011.10_24785;NC_000020.11_34751;hsa-miR-328-3p;hsa-miR-659-5p;hsa-miR-181c-5p;hsa-miR-664a-5p;NC_000017.11_32431;hsa-miR-6511b-5p;hsa-miR-193a-5p;NC_000014.9_29046;hsa-miR-24-3p;hsa-miR-6842-3p;hsa-miR-98-5p;hsa-miR-4443;NC_000009.12_21531
KALRN	8997	hsa_circ_0059354	0.933333	8.93685e-43	24	hsa-miR-30d-5p;NC_000024.10_38844;hsa-miR-181a-5p;NC_000010.11_22861;hsa-miR-27a-3p;hsa-miR-22-3p;hsa-miR-449c-5p;hsa-miR-3929;hsa-miR-9-5p;hsa-miR-22-5p;hsa-miR-215-3p;NC_000011.10_24785;hsa-miR-181c-5p;NC_000017.11_32431;hsa-miR-6511b-5p;hsa-miR-193a-5p;NC_000014.9_29046;hsa-miR-24-3p;hsa-miR-6842-3p;NC_000002.12_3880;hsa-miR-98-5p;hsa-miR-4758-3p;hsa-miR-148a-3p;hsa-miR-4443
CNTRL	11064	hsa_circ_0008221	0.120192	9.50368e-43	23	hsa-miR-215-5p;NC_000016.10_31213;hsa-miR-181a-5p;NC_000010.11_22861;hsa-miR-499a-5p;hsa-miR-21-5p;hsa-miR-22-3p;hsa-miR-9-5p;hsa-miR-3929;hsa-miR-203a-3p;hsa-miR-22-5p;NC_000011.10_24785;hsa-miR-181c-5p;hsa-miR-6511b-5p;hsa-miR-193a-5p;hsa-miR-24-3p;hsa-miR-6842-3p;NC_000002.12_3880;hsa-miR-98-5p;NC_000004.12_10963;NC_000011.10_23882;hsa-miR-4443;NC_000009.12_21531
AUTS2	26053	hsa_circ_0053716	0.836364	2.28017e-42	29	NC_000019.10_34542;hsa-miR-548i;hsa-miR-15b-3p;hsa-miR-5585-3p;hsa-miR-3529-3p;NC_000007.14_17821;hsa-miR-3155a;NC_000021.9_35751;NC_000004.12_9958;hsa-miR-7974;NC_000003.12_9133;NC_000010.11_23303;NC_000018.10_33504*;NC_000009.12_20733;NC_000002.12_3238;hsa-miR-3662;hsa-miR-520a-3p;hsa-miR-302c-5p;NC_000001.11_3101;NC_000010.11_23646;hsa-miR-92a-1-5p;hsa-miR-372-5p;NC_000007.14_17824;hsa-let-7c-…
PBX1	5087	hsa_circ_0008221	0.0817308	3.05311e-42	24	hsa-miR-181a-5p;NC_000010.11_22861;hsa-miR-499a-5p;hsa-miR-21-5p;hsa-miR-22-3p;hsa-miR-9-5p;hsa-miR-3929;hsa-miR-203a-3p;NC_000016.10_31515;hsa-miR-22-5p;NC_000020.11_34751;hsa-miR-328-3p;hsa-miR-181c-5p;hsa-miR-664a-5p;NC_000017.11_32431;hsa-miR-6511b-5p;hsa-miR-193a-5p;NC_000014.9_29046;hsa-miR-24-3p;NC_000002.12_3880;hsa-miR-98-5p;NC_000011.10_23882;hsa-miR-4443;NC_000009.12_21531
DIAPH3	81624	hsa_circ_0008221	0.100962	3.05311e-42	24	hsa-miR-30d-5p;hsa-miR-181a-5p;NC_000010.11_22861;hsa-miR-499a-5p;hsa-miR-21-5p;hsa-miR-22-3p;hsa-miR-9-5p;hsa-miR-3929;hsa-miR-203a-3p;NC_000016.10_31515;hsa-miR-22-5p;NC_000011.10_24785;NC_000020.11_34751;hsa-miR-328-3p;hsa-miR-659-5p;hsa-miR-181c-5p;hsa-miR-369-3p;NC_000017.11_32431;hsa-miR-6511b-5p;NC_000003.12_9115;hsa-miR-6842-3p;NC_000002.12_3880;hsa-miR-98-5p;hsa-miR-4443
KALRN	8997	hsa_circ_0086848	0.959184	3.1953e-42	23	hsa-miR-4443;NC_000005.10_13790;NC_000010.11_22861;hsa-miR-22-3p;hsa-miR-449c-5p;hsa-miR-3929;hsa-miR-9-5p;NC_000019.10_34428;hsa-miR-203a-3p;hsa-miR-22-5p;hsa-miR-328-3p;hsa-miR-659-5p;hsa-miR-369-3p;hsa-miR-4435;NC_000017.11_32431;hsa-miR-6511b-5p;hsa-miR-193a-5p;hsa-miR-24-3p;hsa-miR-6842-3p;hsa-miR-98-5p;hsa-miR-148a-3p;NC_000011.10_23882;hsa-miR-183-5p
RAD54L	8438	hsa_circ_0052203	0.694444	3.37927e-42	21	NC_000014.9_29046;hsa-miR-26b-5p;NC_000024.10_38844;hsa-miR-6842-3p;hsa-miR-6807-5p;hsa-miR-181c-5p;hsa-miR-22-3p;hsa-miR-449c-5p;hsa-miR-3929;hsa-miR-4435;hsa-miR-98-5p;hsa-miR-148a-3p;NC_000017.11_32431;hsa-miR-22-5p;hsa-miR-6511b-5p;NC_000010.11_22861;hsa-miR-642a-5p;NC_000011.10_24785;NC_000010.11_22289;hsa-miR-4443;NC_000009.12_21531
FRAS1	80144	hsa_circ_0059713	0.780488	3.72291e-42	28	hsa-miR-573;hsa-miR-582-5p;hsa-miR-3529-3p;hsa-miR-34c-5p;hsa-miR-302a-5p;NC_000023.11_36905;NC_000021.9_35751;hsa-miR-7974;NC_000003.12_9133;hsa-miR-373-5p;NC_000018.10_33504*;NC_000009.12_21925;hsa-miR-526b-5p;NC_000002.12_3238;hsa-miR-3662;NC_000005.10_11919>NC_000005.10_11920;NC_000009.12_21957;NC_000010.11_23646;NC_000016.10_31157;NC_000022.11_36437;hsa-miR-7-5p;hsa-miR-205-5p;hsa-miR-372-5p…
ASPM	259266	hsa_circ_0008221	0.144231	1.11401e-41	24	hsa-miR-30d-5p;hsa-miR-181a-5p;hsa-miR-499a-5p;hsa-miR-21-5p;hsa-miR-155-5p;hsa-miR-27a-3p;hsa-miR-22-3p;hsa-miR-9-5p;hsa-miR-3929;NC_000019.10_34428;hsa-miR-203a-3p;hsa-miR-22-5p;NC_000011.10_24785;NC_000020.11_34751;hsa-miR-328-3p;hsa-miR-181c-5p;hsa-miR-369-3p;NC_000017.11_32431;hsa-miR-6511b-5p;NC_000003.12_9115;hsa-miR-24-3p;NC_000002.12_3880;NC_000011.10_23882;NC_000009.12_21531
SERTAD2	9792	hsa_circ_0059713	0.756098	1.40583e-41	27	hsa-miR-548i;hsa-miR-582-5p;hsa-miR-3529-3p;NC_000006.12_16700;NC_000023.11_36905;hsa-miR-302a-5p;hsa-miR-7974;hsa-miR-373-5p;NC_000018.10_33504*;NC_000009.12_21925;hsa-miR-526b-5p;NC_000006.12_15769;NC_000018.10_33037;hsa-miR-3662;NC_000005.10_11919>NC_000005.10_11920;hsa-miR-92a-3p;NC_000009.12_21957;NC_000010.11_23646;NC_000022.11_36437;hsa-miR-7-5p;hsa-miR-205-5p;hsa-miR-372-5p;hsa-miR-20a-5p…
MGEA5	10724	hsa_circ_0059713	0.756098	3.43231e-41	28	hsa-miR-548i;hsa-miR-582-5p;hsa-miR-3529-3p;hsa-miR-34c-5p;NC_000006.12_16700;hsa-miR-302a-5p;hsa-miR-7974;NC_000003.12_9133;hsa-miR-373-5p;NC_000009.12_21925;hsa-miR-526b-5p;NC_000002.12_3238;NC_000006.12_15769;NC_000018.10_33037;hsa-miR-3662;hsa-miR-92a-3p;NC_000009.12_21957;NC_000001.11_2997;NC_000016.10_31157;NC_000022.11_36437;hsa-miR-7-5p;hsa-miR-205-5p;hsa-miR-372-5p;hsa-miR-20a-5p;NC_0000…
KALRN	8997	hsa_circ_0052203	0.944444	7.58562e-41	23	NC_000024.10_38844;NC_000010.11_22861;hsa-miR-26b-5p;hsa-miR-22-3p;hsa-miR-449c-5p;hsa-miR-3929;hsa-miR-22-5p;NC_000011.10_24785;NC_000020.11_34751;hsa-miR-181c-5p;hsa-miR-4435;NC_000017.11_32431;NC_000017.11_32431*;hsa-miR-6511b-5p;NC_000010.11_22289;NC_000014.9_29046;hsa-miR-6842-3p;hsa-miR-6807-5p;NC_000002.12_3880;hsa-miR-98-5p;hsa-miR-148a-3p;hsa-miR-4443;NC_000009.12_21531
KALRN	8997	hsa_circ_0006957	0.380952	1.02379e-40	24	hsa-miR-30d-5p;NC_000010.11_22861;hsa-miR-21-5p;hsa-miR-155-5p;hsa-miR-27a-3p;NC_000001.11_1021;hsa-miR-22-3p;hsa-miR-3929;hsa-miR-449c-5p;hsa-miR-9-5p;NC_000012.12_26540;NC_000019.10_34428;NC_000016.10_31515;hsa-miR-22-5p;NC_000011.10_24785;NC_000020.11_34751;hsa-miR-659-5p;hsa-miR-664a-5p;hsa-miR-193a-5p;NC_000014.9_29046;NC_000003.12_9115;hsa-miR-24-3p;hsa-miR-6807-5p;NC_000011.10_23882
PARP9	83666	hsa_circ_0008221	0.0961538	1.08519e-40	23	hsa-miR-30d-5p;hsa-miR-215-5p;hsa-miR-499a-5p;hsa-miR-155-5p;hsa-miR-27a-3p;hsa-miR-449c-5p;hsa-miR-3929;NC_000019.10_34428;hsa-miR-203a-3p;hsa-miR-22-5p;NC_000016.10_31515;NC_000011.10_24785;hsa-miR-328-3p;hsa-miR-659-5p;hsa-miR-664a-5p;NC_000017.11_32431;hsa-miR-6511b-5p;NC_000003.12_9115;hsa-miR-6842-3p;hsa-miR-98-5p;NC_000004.12_10963;NC_000011.10_23882;hsa-miR-4443
SP100	6672	hsa_circ_0008221	0.0721154	1.08519e-40	23	hsa-miR-181a-5p;NC_000010.11_22861;hsa-miR-499a-5p;hsa-miR-21-5p;hsa-miR-27a-3p;hsa-miR-22-3p;hsa-miR-9-5p;hsa-miR-3929;NC_000019.10_34428;hsa-miR-22-5p;hsa-miR-328-3p;hsa-miR-181c-5p;hsa-miR-369-3p;hsa-miR-664a-5p;NC_000017.11_32431;NC_000014.9_29046;hsa-miR-24-3p;hsa-miR-6842-3p;NC_000002.12_3880;hsa-miR-98-5p;NC_000011.10_23882;hsa-miR-4443;NC_000009.12_21531
HMGB1	3146	hsa_circ_0008221	0.0649038	1.3829e-40	22	hsa-miR-30d-5p;hsa-miR-215-5p;hsa-miR-181a-5p;hsa-miR-499a-5p;hsa-miR-21-5p;hsa-miR-9-5p;hsa-miR-449c-5p;hsa-miR-203a-3p;hsa-miR-22-5p;NC_000011.10_24785;NC_000020.11_34751;hsa-miR-659-5p;hsa-miR-181c-5p;hsa-miR-664a-5p;NC_000017.11_32431;hsa-miR-6511b-5p;hsa-miR-24-3p;NC_000002.12_3880;hsa-miR-98-5p;NC_000011.10_23882;hsa-miR-4443;NC_000009.12_21531
GATM	2628	hsa_circ_0008221	0.0793269	1.3829e-40	22	hsa-miR-30d-5p;hsa-miR-215-5p;hsa-miR-181a-5p;hsa-miR-21-5p;hsa-miR-155-5p;hsa-miR-22-3p;hsa-miR-449c-5p;hsa-miR-9-5p;NC_000019.10_34428;hsa-miR-203a-3p;NC_000016.10_31515;NC_000011.10_24785;NC_000020.11_34751;hsa-miR-328-3p;hsa-miR-659-5p;hsa-miR-181c-5p;hsa-miR-369-3p;hsa-miR-193a-5p;NC_000003.12_9115;hsa-miR-24-3p;hsa-miR-98-5p;NC_000009.12_21531
TTBK2	146057	hsa_circ_0059713	0.731707	1.6235e-40	28	hsa-miR-573;hsa-miR-548i;hsa-miR-582-5p;hsa-miR-34c-5p;NC_000006.12_16700;NC_000023.11_36905;hsa-miR-302a-5p;hsa-miR-7974;NC_000003.12_9133;hsa-miR-373-5p;NC_000009.12_21925;hsa-miR-526b-5p;NC_000002.12_3238;NC_000006.12_15769;NC_000018.10_33037;hsa-miR-3662;NC_000005.10_11919>NC_000005.10_11920;hsa-miR-92a-3p;NC_000009.12_21957;NC_000001.11_2997;hsa-miR-7-5p;NC_000022.11_36437;hsa-miR-372-5p;hsa…
ANK2	287	hsa_circ_0059713	0.853659	1.73542e-40	30	hsa-miR-573;hsa-miR-548i;hsa-miR-582-5p;hsa-miR-3529-3p;hsa-miR-34c-5p;NC_000006.12_16700;NC_000023.11_36905;NC_000021.9_35751;hsa-miR-7974;NC_000003.12_9133;hsa-miR-373-5p;NC_000018.10_33504*;NC_000009.12_21925;hsa-miR-526b-5p;NC_000002.12_3238;NC_000006.12_15769;NC_000018.10_33037;hsa-miR-3662;NC_000005.10_11919>NC_000005.10_11920;NC_000009.12_21957;NC_000001.11_2997;NC_000010.11_23646;NC_00001…
MYT1L	23040	hsa_circ_0059354	0.6	2.58176e-40	22	hsa-miR-30d-5p;NC_000024.10_38844;NC_000016.10_31213;hsa-miR-181a-5p;NC_000010.11_22861;hsa-miR-27a-3p;hsa-miR-22-3p;hsa-miR-449c-5p;hsa-miR-3929;hsa-miR-9-5p;hsa-miR-22-5p;NC_000011.10_24785;hsa-miR-181c-5p;NC_000017.11_32431;hsa-miR-6511b-5p;hsa-miR-193a-5p;NC_000014.9_29046;hsa-miR-24-3p;hsa-miR-6842-3p;NC_000002.12_3880;hsa-miR-98-5p;hsa-miR-4443
MKI67	4288	hsa_circ_0008221	0.149038	3.56273e-40	24	hsa-miR-181a-5p;NC_000010.11_22861;hsa-miR-21-5p;hsa-miR-27a-3p;hsa-miR-22-3p;hsa-miR-449c-5p;hsa-miR-9-5p;hsa-miR-203a-3p;NC_000016.10_31515;hsa-miR-22-5p;NC_000011.10_24785;NC_000020.11_34751;hsa-miR-659-5p;hsa-miR-181c-5p;hsa-miR-369-3p;NC_000017.11_32431;hsa-miR-6511b-5p;hsa-miR-193a-5p;hsa-miR-24-3p;hsa-miR-6842-3p;NC_000002.12_3880;hsa-miR-98-5p;hsa-miR-4443;NC_000009.12_21531
FANCA	2175	hsa_circ_0008221	0.100962	3.60868e-40	25	hsa-miR-30d-5p;hsa-miR-181a-5p;hsa-miR-27a-3p;hsa-miR-22-3p;hsa-miR-449c-5p;hsa-miR-3929;hsa-miR-9-5p;NC_000019.10_34428;hsa-miR-203a-3p;hsa-miR-22-5p;NC_000011.10_24785;NC_000020.11_34751;hsa-miR-328-3p;hsa-miR-659-5p;hsa-miR-181c-5p;hsa-miR-664a-5p;NC_000017.11_32431;hsa-miR-6511b-5p;hsa-miR-193a-5p;NC_000014.9_29046;NC_000003.12_9115;hsa-miR-24-3p;hsa-miR-6842-3p;hsa-miR-4443;NC_000009.12_21531
SETMAR	6419	hsa_circ_0008221	0.0721154	3.79435e-40	21	hsa-miR-30d-5p;hsa-miR-21-5p;hsa-miR-193a-5p;hsa-miR-27a-3p;NC_000014.9_29046;hsa-miR-24-3p;hsa-miR-659-5p;hsa-miR-181c-5p;hsa-miR-22-3p;hsa-miR-449c-5p;NC_000016.10_31213;hsa-miR-9-5p;hsa-miR-664a-5p;NC_000002.12_3880;hsa-miR-98-5p;NC_000019.10_34428;hsa-miR-181a-5p;hsa-miR-6511b-5p;hsa-miR-22-5p;NC_000011.10_23882;NC_000020.11_34751
CDCA2	157313	hsa_circ_0008221	0.0793269	4.18304e-40	23	hsa-miR-215-5p;hsa-miR-181a-5p;hsa-miR-499a-5p;hsa-miR-27a-3p;hsa-miR-9-5p;hsa-miR-22-3p;hsa-miR-3929;hsa-miR-203a-3p;hsa-miR-22-5p;NC_000011.10_24785;NC_000020.11_34751;hsa-miR-181c-5p;hsa-miR-369-3p;NC_000017.11_32431;hsa-miR-6511b-5p;hsa-miR-193a-5p;NC_000014.9_29046;hsa-miR-24-3p;hsa-miR-6842-3p;NC_000002.12_3880;hsa-miR-98-5p;NC_000004.12_10963;NC_000009.12_21531
GRB10	2887	hsa_circ_0059713	0.756098	1.1325e-39	28	hsa-miR-548i;hsa-miR-582-5p;hsa-miR-3529-3p;hsa-miR-34c-5p;NC_000006.12_16700;NC_000023.11_36905;hsa-miR-7974;NC_000018.10_33504*;NC_000009.12_21925;hsa-miR-526b-5p;NC_000002.12_3238;NC_000006.12_15769;NC_000018.10_33037;hsa-miR-3662;NC_000005.10_11919>NC_000005.10_11920;hsa-miR-92a-3p;NC_000009.12_21957;NC_000001.11_2997;NC_000010.11_23646;NC_000016.10_31157;NC_000022.11_36437;hsa-miR-205-5p;hsa…
TSC22D1	8848	hsa_circ_0053716	0.618182	1.4679e-39	26	NC_000019.10_34542;hsa-miR-548i;hsa-miR-15b-3p;hsa-miR-5585-3p;hsa-miR-3529-3p;NC_000007.14_17821;hsa-miR-3155a;NC_000021.9_35751;NC_000004.12_9958;hsa-miR-7974;NC_000010.11_23303;NC_000018.10_33504*;NC_000009.12_20733;hsa-miR-3662;hsa-miR-520a-3p;hsa-miR-302c-5p;NC_000001.11_3101;NC_000010.11_23646;hsa-miR-92a-1-5p;NC_000007.14_17824;hsa-let-7c-5p;hsa-miR-512-3p;hsa-miR-510-5p;hsa-miR-302b-5p;hs…
SLC1A2	6506	hsa_circ_0008221	0.139423	3.44598e-39	22	hsa-miR-30d-5p;hsa-miR-215-5p;NC_000016.10_31213;hsa-miR-155-5p;hsa-miR-27a-3p;hsa-miR-22-3p;hsa-miR-449c-5p;hsa-miR-3929;hsa-miR-9-5p;hsa-miR-203a-3p;hsa-miR-22-5p;NC_000011.10_24785;NC_000020.11_34751;hsa-miR-369-3p;hsa-miR-664a-5p;NC_000017.11_32431;NC_000014.9_29046;NC_000003.12_9115;hsa-miR-24-3p;NC_000002.12_3880;hsa-miR-98-5p;hsa-miR-4443
KIF4A	24137	hsa_circ_0052203	0.666667	4.53407e-39	20	NC_000014.9_29046;hsa-miR-26b-5p;NC_000024.10_38844;hsa-miR-6842-3p;hsa-miR-6807-5p;hsa-miR-22-3p;hsa-miR-449c-5p;NC_000002.12_3880;hsa-miR-4435;hsa-miR-148a-3p;NC_000017.11_32431;NC_000017.11_32431*;hsa-miR-6511b-5p;hsa-miR-642a-5p;hsa-miR-22-5p;NC_000011.10_24785;NC_000010.11_22289;NC_000010.11_22861;hsa-miR-4443;NC_000009.12_21531
CYP19A1	1588	hsa_circ_0008221	0.0600962	4.78432e-39	20	hsa-miR-328-3p;hsa-miR-193a-5p;hsa-miR-21-5p;hsa-miR-30d-5p;NC_000003.12_9115;hsa-miR-181c-5p;NC_000002.12_3880;hsa-miR-22-3p;hsa-miR-369-3p;hsa-miR-3929;hsa-miR-449c-5p;hsa-miR-98-5p;NC_000019.10_34428;hsa-miR-203a-3p;hsa-miR-181a-5p;hsa-miR-6511b-5p;hsa-miR-22-5p;NC_000011.10_23882;NC_000020.11_34751;hsa-miR-4443
ZNF704	619279	hsa_circ_0059713	0.756098	6.93933e-39	28	hsa-miR-573;hsa-miR-582-5p;hsa-miR-3529-3p;hsa-miR-34c-5p;NC_000006.12_16700;NC_000023.11_36905;hsa-miR-302a-5p;NC_000021.9_35751;hsa-miR-7974;NC_000003.12_9133;hsa-miR-373-5p;NC_000018.10_33504*;NC_000009.12_21925;hsa-miR-526b-5p;NC_000002.12_3238;NC_000006.12_15769;NC_000018.10_33037;hsa-miR-3662;hsa-miR-92a-3p;NC_000010.11_23646;NC_000016.10_31157;hsa-miR-205-5p;NC_000022.11_36437;hsa-miR-7-5p…
NAV2	89797	hsa_circ_0059354	0.666667	9.32139e-39	22	hsa-miR-30d-5p;NC_000024.10_38844;hsa-miR-181a-5p;NC_000010.11_22861;hsa-miR-27a-3p;hsa-miR-22-3p;hsa-miR-449c-5p;hsa-miR-3929;hsa-miR-9-5p;hsa-miR-22-5p;hsa-miR-215-3p;NC_000011.10_24785;hsa-miR-181c-5p;NC_000017.11_32431;hsa-miR-6511b-5p;hsa-miR-193a-5p;hsa-miR-24-3p;hsa-miR-6842-3p;NC_000002.12_3880;hsa-miR-98-5p;hsa-miR-148a-3p;hsa-miR-4443
MAP2	4133	hsa_circ_0059713	0.756098	1.07202e-38	28	hsa-miR-573;hsa-miR-582-5p;hsa-miR-34c-5p;NC_000006.12_16700;NC_000023.11_36905;hsa-miR-302a-5p;NC_000021.9_35751;hsa-miR-7974;NC_000003.12_9133;hsa-miR-373-5p;NC_000009.12_21925;hsa-miR-526b-5p;NC_000002.12_3238;NC_000006.12_15769;NC_000018.10_33037;hsa-miR-3662;NC_000005.10_11919>NC_000005.10_11920;NC_000009.12_21957;NC_000010.11_23646;NC_000016.10_31157;NC_000022.11_36437;hsa-miR-205-5p;hsa-mi…
HIPK2	28996	hsa_circ_0059713	0.804878	1.09016e-38	29	hsa-miR-573;hsa-miR-582-5p;hsa-miR-34c-5p;NC_000006.12_16700;NC_000023.11_36905;hsa-miR-302a-5p;NC_000021.9_35751;hsa-miR-7974;NC_000003.12_9133;hsa-miR-373-5p;NC_000018.10_33504*;NC_000009.12_21925;hsa-miR-526b-5p;NC_000002.12_3238;NC_000006.12_15769;NC_000018.10_33037;hsa-miR-3662;NC_000005.10_11919>NC_000005.10_11920;NC_000009.12_21957;NC_000010.11_23646;NC_000022.11_36437;hsa-miR-205-5p;hsa-m…
TRANK1	9881	hsa_circ_0008221	0.146635	1.41962e-38	22	hsa-miR-215-5p;hsa-miR-181a-5p;NC_000010.11_22861;hsa-miR-499a-5p;hsa-miR-9-5p;hsa-miR-22-3p;hsa-miR-3929;hsa-miR-203a-3p;hsa-miR-22-5p;hsa-miR-659-5p;hsa-miR-181c-5p;hsa-miR-664a-5p;NC_000017.11_32431;hsa-miR-6511b-5p;hsa-miR-193a-5p;hsa-miR-24-3p;hsa-miR-6842-3p;NC_000002.12_3880;hsa-miR-98-5p;NC_000011.10_23882;hsa-miR-4443;NC_000009.12_21531
GAS2L3	283431	hsa_circ_0008221	0.112981	1.41962e-38	22	hsa-miR-30d-5p;hsa-miR-215-5p;NC_000016.10_31213;hsa-miR-181a-5p;NC_000010.11_22861;hsa-miR-499a-5p;hsa-miR-155-5p;hsa-miR-9-5p;hsa-miR-449c-5p;hsa-miR-3929;hsa-miR-203a-3p;hsa-miR-22-5p;NC_000020.11_34751;hsa-miR-181c-5p;hsa-miR-369-3p;hsa-miR-6511b-5p;hsa-miR-193a-5p;NC_000003.12_9115;NC_000002.12_3880;hsa-miR-98-5p;NC_000004.12_10963;NC_000009.12_21531
TICRR	90381	hsa_circ_0008221	0.141827	1.49329e-38	23	hsa-miR-30d-5p;hsa-miR-181a-5p;hsa-miR-27a-3p;hsa-miR-22-3p;hsa-miR-449c-5p;hsa-miR-3929;hsa-miR-9-5p;hsa-miR-203a-3p;hsa-miR-22-5p;NC_000011.10_24785;hsa-miR-328-3p;hsa-miR-181c-5p;hsa-miR-664a-5p;NC_000017.11_32431;hsa-miR-6511b-5p;hsa-miR-193a-5p;NC_000014.9_29046;NC_000003.12_9115;hsa-miR-24-3p;hsa-miR-6842-3p;hsa-miR-98-5p;NC_000011.10_23882;NC_000009.12_21531
CIT	11113	hsa_circ_0008221	0.139423	1.49329e-38	23	hsa-miR-30d-5p;hsa-miR-181a-5p;NC_000010.11_22861;hsa-miR-27a-3p;hsa-miR-22-3p;hsa-miR-9-5p;NC_000019.10_34428;hsa-miR-203a-3p;hsa-miR-22-5p;NC_000011.10_24785;NC_000020.11_34751;hsa-miR-181c-5p;hsa-miR-369-3p;hsa-miR-664a-5p;hsa-miR-6511b-5p;hsa-miR-193a-5p;NC_000014.9_29046;NC_000003.12_9115;hsa-miR-24-3p;hsa-miR-6842-3p;hsa-miR-98-5p;NC_000011.10_23882;hsa-miR-4443
PDE4D	5144	hsa_circ_0008221	0.129808	1.49329e-38	23	hsa-miR-30d-5p;hsa-miR-181a-5p;hsa-miR-499a-5p;hsa-miR-21-5p;hsa-miR-27a-3p;hsa-miR-22-3p;hsa-miR-9-5p;hsa-miR-3929;hsa-miR-203a-3p;hsa-miR-22-5p;NC_000011.10_24785;NC_000020.11_34751;hsa-miR-328-3p;hsa-miR-181c-5p;NC_000017.11_32431;hsa-miR-6511b-5p;hsa-miR-193a-5p;NC_000003.12_9115;hsa-miR-24-3p;hsa-miR-6842-3p;NC_000002.12_3880;NC_000011.10_23882;hsa-miR-4443
VTI1A	143187	hsa_circ_0059713	0.731707	1.58046e-38	29	hsa-miR-573;hsa-miR-582-5p;hsa-miR-3529-3p;hsa-miR-34c-5p;NC_000006.12_16700;NC_000023.11_36905;hsa-miR-302a-5p;NC_000021.9_35751;hsa-miR-7974;hsa-miR-373-5p;NC_000018.10_33504*;NC_000009.12_21925;hsa-miR-526b-5p;NC_000002.12_3238;NC_000006.12_15769;NC_000018.10_33037;hsa-miR-3662;NC_000005.10_11919>NC_000005.10_11920;NC_000010.11_23646;NC_000016.10_31157;NC_000022.11_36437;hsa-miR-205-5p;hsa-miR…
PLEKHA6	22874	hsa_circ_0059354	0.688889	1.78458e-38	22	hsa-miR-30d-5p;NC_000024.10_38844;hsa-miR-181a-5p;NC_000010.11_22861;hsa-miR-27a-3p;hsa-miR-22-3p;hsa-miR-9-5p;hsa-miR-3929;hsa-miR-22-5p;hsa-miR-215-3p;NC_000011.10_24785;hsa-miR-181c-5p;NC_000017.11_32431;hsa-miR-6511b-5p;hsa-miR-193a-5p;NC_000014.9_29046;hsa-miR-24-3p;hsa-miR-6842-3p;NC_000002.12_3880;hsa-miR-98-5p;hsa-miR-4758-3p;hsa-miR-4443
IQSEC2	23096	hsa_circ_0059713	0.682927	2.09402e-38	26	hsa-miR-573;hsa-miR-548i;hsa-miR-3529-3p;hsa-miR-34c-5p;NC_000006.12_16700;NC_000021.9_35751;hsa-miR-7974;NC_000003.12_9133;hsa-miR-373-5p;NC_000009.12_21925;hsa-miR-526b-5p;NC_000002.12_3238;NC_000006.12_15769;hsa-miR-3662;NC_000005.10_11919>NC_000005.10_11920;NC_000009.12_21957;NC_000001.11_2997;NC_000010.11_23646;NC_000016.10_31157;hsa-miR-7-5p;hsa-miR-205-5p;hsa-miR-20a-5p;NC_000011.10_25384;…
SYNPO	11346	hsa_circ_0059354	0.644444	4.18412e-38	21	hsa-miR-30d-5p;hsa-miR-193a-5p;NC_000014.9_29046;hsa-miR-24-3p;hsa-miR-6842-3p;hsa-miR-181c-5p;hsa-miR-9-5p;hsa-miR-449c-5p;hsa-miR-3929;NC_000002.12_3880;hsa-miR-98-5p;hsa-miR-4758-3p;NC_000017.11_32431;hsa-miR-148a-3p;hsa-miR-181a-5p;hsa-miR-22-5p;NC_000010.11_22861;hsa-miR-6511b-5p;hsa-miR-215-3p;NC_000011.10_24785;hsa-miR-4443
NFIB	4781	hsa_circ_0008221	0.120192	4.33256e-38	23	hsa-miR-30d-5p;hsa-miR-181a-5p;NC_000010.11_22861;hsa-miR-499a-5p;hsa-miR-21-5p;hsa-miR-27a-3p;hsa-miR-22-3p;hsa-miR-449c-5p;hsa-miR-3929;hsa-miR-9-5p;hsa-miR-203a-3p;hsa-miR-22-5p;NC_000011.10_24785;NC_000020.11_34751;hsa-miR-181c-5p;hsa-miR-369-3p;hsa-miR-193a-5p;NC_000014.9_29046;NC_000003.12_9115;hsa-miR-6842-3p;hsa-miR-98-5p;NC_000011.10_23882;NC_000009.12_21531
CCNF	899	hsa_circ_0059354	0.666667	6.35333e-38	20	hsa-miR-30d-5p;hsa-miR-193a-5p;hsa-miR-27a-3p;hsa-miR-24-3p;hsa-miR-6842-3p;hsa-miR-181c-5p;hsa-miR-22-3p;hsa-miR-449c-5p;hsa-miR-3929;hsa-miR-9-5p;NC_000002.12_3880;hsa-miR-98-5p;NC_000017.11_32431;hsa-miR-4758-3p;hsa-miR-148a-3p;hsa-miR-181a-5p;hsa-miR-6511b-5p;hsa-miR-22-5p;NC_000011.10_24785;hsa-miR-4443
NCAPD3	23310	hsa_circ_0059354	0.577778	6.35333e-38	20	hsa-miR-193a-5p;hsa-miR-27a-3p;NC_000024.10_38844;hsa-miR-24-3p;hsa-miR-6842-3p;hsa-miR-181c-5p;hsa-miR-22-3p;hsa-miR-449c-5p;hsa-miR-3929;hsa-miR-9-5p;NC_000002.12_3880;hsa-miR-98-5p;NC_000017.11_32431;hsa-miR-148a-3p;hsa-miR-181a-5p;hsa-miR-22-5p;NC_000010.11_22861;hsa-miR-6511b-5p;hsa-miR-215-3p;NC_000011.10_24785
SLC7A11	23657	hsa_circ_0059713	0.756098	8.52186e-38	27	hsa-miR-573;hsa-miR-548i;hsa-miR-582-5p;hsa-miR-3529-3p;NC_000023.11_36905;hsa-miR-302a-5p;NC_000021.9_35751;NC_000003.12_9133;hsa-miR-373-5p;NC_000018.10_33504*;NC_000009.12_21925;NC_000002.12_3238;NC_000006.12_15769;NC_000018.10_33037;hsa-miR-3662;hsa-miR-92a-3p;NC_000009.12_21957;NC_000001.11_2997;NC_000010.11_23646;NC_000016.10_31157;hsa-miR-7-5p;hsa-miR-372-5p;hsa-miR-20a-5p;NC_000011.10_253…
PPARA	5465	hsa_circ_0076332	0.837838	8.58911e-38	26	NC_000003.12_7520;hsa-miR-573;hsa-miR-3143;NC_000003.12_8583;NC_000003.12_7973;hsa-miR-15b-3p;hsa-miR-5585-3p;hsa-miR-34c-5p;hsa-miR-522-3p;hsa-miR-18a-3p;NC_000010.11_23303;NC_000012.12_26286;NC_000006.12_15769;hsa-miR-3662;hsa-miR-520c-3p;NC_000008.11_20037*;hsa-miR-548j-3p;hsa-miR-27b-5p;hsa-miR-17-5p;NC_000013.11_27627;NC_000008.11_19445;hsa-miR-20a-5p;hsa-miR-512-3p;hsa-miR-302b-5p;hsa-miR-1…
PRICKLE2	166336	hsa_circ_0086848	0.836735	1.10541e-37	21	hsa-miR-328-3p;hsa-miR-193a-5p;hsa-miR-4443;hsa-miR-24-3p;hsa-miR-659-5p;hsa-miR-6842-3p;hsa-miR-369-3p;hsa-miR-9-5p;hsa-miR-22-3p;hsa-miR-3929;hsa-miR-449c-5p;hsa-miR-4435;hsa-miR-98-5p;NC_000017.11_32431;NC_000019.10_34428;hsa-miR-203a-3p;hsa-miR-22-5p;hsa-miR-6511b-5p;NC_000010.11_22861;NC_000011.10_23882;hsa-miR-183-5p
GFPT1	2673	hsa_circ_0076332	0.756757	1.31214e-37	26	NC_000003.12_7520;hsa-miR-573;hsa-miR-3143;NC_000003.12_8583;NC_000003.12_7973;hsa-miR-15b-3p;NC_000007.14_17821;hsa-miR-522-3p;hsa-miR-34c-5p;hsa-miR-18a-3p;hsa-miR-373-5p;NC_000012.12_26286;NC_000006.12_15769;hsa-miR-3662;hsa-miR-520c-3p;NC_000008.11_20037*;hsa-miR-27b-5p;hsa-miR-372-5p;NC_000013.11_27627;hsa-miR-17-5p;NC_000008.11_19445;NC_000018.10_33742;hsa-miR-20a-5p;hsa-miR-512-3p;hsa-miR-…
NCAPD3	23310	hsa_circ_0008221	0.105769	1.81317e-37	22	hsa-miR-181a-5p;NC_000010.11_22861;hsa-miR-21-5p;hsa-miR-27a-3p;hsa-miR-22-3p;hsa-miR-449c-5p;hsa-miR-3929;hsa-miR-9-5p;NC_000019.10_34428;hsa-miR-22-5p;NC_000011.10_24785;hsa-miR-328-3p;hsa-miR-181c-5p;NC_000017.11_32431;hsa-miR-6511b-5p;hsa-miR-193a-5p;hsa-miR-24-3p;hsa-miR-6842-3p;NC_000002.12_3880;hsa-miR-98-5p;NC_000011.10_23882;NC_000009.12_21531
WDR62	284403	hsa_circ_0008221	0.100962	1.81317e-37	22	NC_000010.11_22861;hsa-miR-27a-3p;hsa-miR-9-5p;hsa-miR-449c-5p;NC_000019.10_34428;hsa-miR-22-5p;NC_000016.10_31515;NC_000011.10_24785;NC_000020.11_34751;hsa-miR-328-3p;hsa-miR-659-5p;NC_000017.11_32431;hsa-miR-6511b-5p;hsa-miR-193a-5p;NC_000014.9_29046;hsa-miR-24-3p;hsa-miR-6842-3p;NC_000002.12_3880;hsa-miR-98-5p;NC_000011.10_23882;hsa-miR-4443;NC_000009.12_21531
LMO7	4008	hsa_circ_0059713	0.731707	2.11625e-37	27	hsa-miR-573;hsa-miR-548i;hsa-miR-582-5p;hsa-miR-3529-3p;hsa-miR-34c-5p;NC_000006.12_16700;hsa-miR-302a-5p;hsa-miR-7974;NC_000003.12_9133;hsa-miR-373-5p;NC_000018.10_33504*;NC_000009.12_21925;hsa-miR-526b-5p;NC_000002.12_3238;NC_000006.12_15769;NC_000018.10_33037;hsa-miR-3662;hsa-miR-92a-3p;NC_000010.11_23646;NC_000016.10_31157;NC_000022.11_36437;hsa-miR-205-5p;hsa-miR-7-5p;hsa-miR-20a-5p;NC_00001…
ITPR1	3708	hsa_circ_0053716	0.672727	2.92438e-37	26	NC_000019.10_34542;hsa-miR-548i;hsa-miR-15b-3p;hsa-miR-5585-3p;hsa-miR-3529-3p;NC_000007.14_17821;hsa-miR-3155a;NC_000004.12_9958;NC_000023.11_38289;hsa-miR-7974;NC_000003.12_9133;NC_000010.11_23303;NC_000018.10_33504*;NC_000002.12_3238;hsa-miR-3662;hsa-miR-520a-3p;hsa-miR-92a-3p;NC_000001.11_3101;NC_000010.11_23646;hsa-miR-3677-5p;hsa-miR-372-5p;NC_000007.14_17824;hsa-let-7c-5p;hsa-miR-512-3p;hs…
KNTC1	9735	hsa_circ_0008221	0.0769231	3.98403e-37	20	hsa-miR-30d-5p;hsa-miR-499a-5p;hsa-miR-155-5p;hsa-miR-193a-5p;NC_000014.9_29046;NC_000003.12_9115;hsa-miR-24-3p;hsa-miR-6842-3p;hsa-miR-369-3p;hsa-miR-9-5p;hsa-miR-22-3p;hsa-miR-3929;hsa-miR-664a-5p;hsa-miR-98-5p;hsa-miR-203a-3p;hsa-miR-6511b-5p;hsa-miR-22-5p;NC_000011.10_24785;hsa-miR-4443;NC_000009.12_21531
MCM10	55388	hsa_circ_0008221	0.0721154	4.33455e-37	21	hsa-miR-30d-5p;hsa-miR-21-5p;hsa-miR-155-5p;hsa-miR-499a-5p;hsa-miR-27a-3p;NC_000016.10_31515;hsa-miR-215-5p;hsa-miR-24-3p;hsa-miR-6842-3p;hsa-miR-181c-5p;hsa-miR-9-5p;hsa-miR-369-3p;hsa-miR-3929;hsa-miR-664a-5p;hsa-miR-203a-3p;hsa-miR-181a-5p;hsa-miR-6511b-5p;hsa-miR-22-5p;NC_000011.10_23882;NC_000011.10_24785;hsa-miR-4443
FXN	2395	hsa_circ_0008221	0.108173	4.33455e-37	21	hsa-miR-328-3p;hsa-miR-193a-5p;hsa-miR-21-5p;NC_000014.9_29046;hsa-miR-24-3p;hsa-miR-659-5p;hsa-miR-6842-3p;hsa-miR-369-3p;hsa-miR-9-5p;hsa-miR-449c-5p;hsa-miR-3929;NC_000016.10_31213;hsa-miR-664a-5p;NC_000002.12_3880;NC_000017.11_32431;hsa-miR-98-5p;hsa-miR-6511b-5p;NC_000010.11_22861;NC_000011.10_24785;NC_000020.11_34751;hsa-miR-4443
TUBGCP3	10426	hsa_circ_0008221	0.0769231	4.33455e-37	21	hsa-miR-328-3p;hsa-miR-30d-5p;hsa-miR-21-5p;hsa-miR-155-5p;hsa-miR-193a-5p;NC_000003.12_9115;hsa-miR-24-3p;hsa-miR-659-5p;hsa-miR-181c-5p;hsa-miR-9-5p;hsa-miR-449c-5p;hsa-miR-3929;hsa-miR-98-5p;NC_000017.11_32431;NC_000019.10_34428;hsa-miR-203a-3p;hsa-miR-181a-5p;hsa-miR-6511b-5p;hsa-miR-22-5p;NC_000011.10_24785;NC_000009.12_21531
ZNF704	619279	hsa_circ_0076332	0.837838	4.49096e-37	26	NC_000003.12_7520;hsa-miR-573;hsa-miR-3143;NC_000003.12_8583;NC_000003.12_7973;hsa-miR-15b-3p;hsa-miR-5585-3p;NC_000007.14_17821;hsa-miR-522-3p;hsa-miR-34c-5p;hsa-miR-18a-3p;hsa-miR-302a-5p;hsa-miR-373-5p;NC_000012.12_26286;NC_000006.12_15769;hsa-miR-3662;hsa-miR-520c-3p;NC_000008.11_20037*;hsa-miR-27b-5p;hsa-miR-17-5p;NC_000013.11_27627;NC_000018.10_33742;hsa-miR-20a-5p;hsa-miR-512-3p;hsa-miR-30…
VTI1A	143187	hsa_circ_0076332	0.756757	4.90378e-37	27	NC_000003.12_7520;hsa-miR-573;hsa-miR-3143;NC_000003.12_8583;NC_000003.12_7973;hsa-miR-15b-3p;hsa-miR-5585-3p;NC_000007.14_17821;hsa-miR-522-3p;hsa-miR-34c-5p;hsa-miR-18a-3p;hsa-miR-302a-5p;NC_000010.11_23303;hsa-miR-373-5p;NC_000012.12_26286;NC_000006.12_15769;hsa-miR-3662;hsa-miR-520c-3p;hsa-miR-548j-3p;hsa-miR-372-5p;hsa-miR-17-5p;NC_000008.11_19445;hsa-miR-20a-5p;hsa-miR-512-3p;hsa-miR-302b-5…
KALRN	8997	hsa_circ_0012566	0.96	4.9215e-37	21	hsa-miR-30d-5p;hsa-miR-21-5p;hsa-miR-499a-5p;hsa-miR-193a-5p;NC_000016.10_31515;NC_000003.12_9115;NW_003315954.1_39634;hsa-miR-24-3p;NC_000011.10_23882;hsa-miR-181c-5p;hsa-miR-22-3p;hsa-miR-449c-5p;hsa-miR-9-5p;hsa-miR-664a-5p;hsa-miR-203a-3p;hsa-miR-181a-5p;hsa-miR-22-5p;NC_000010.11_22861;NC_000008.11_18787;hsa-miR-6511b-5p;NC_000009.12_21531
MCM4	4173	hsa_circ_0008221	0.0769231	5.7696e-37	22	hsa-miR-215-5p;hsa-miR-181a-5p;NC_000010.11_22861;hsa-miR-27a-3p;hsa-miR-22-3p;hsa-miR-449c-5p;hsa-miR-3929;hsa-miR-9-5p;NC_000019.10_34428;NC_000020.11_34751;hsa-miR-328-3p;hsa-miR-659-5p;hsa-miR-181c-5p;hsa-miR-664a-5p;NC_000017.11_32431;hsa-miR-6511b-5p;hsa-miR-193a-5p;NC_000014.9_29046;hsa-miR-6842-3p;NC_000002.12_3880;hsa-miR-98-5p;hsa-miR-4443
NAV2	89797	hsa_circ_0052203	0.805556	8.76429e-37	21	NC_000024.10_38844;hsa-miR-6842-3p;hsa-miR-6807-5p;hsa-miR-181c-5p;hsa-miR-22-3p;hsa-miR-449c-5p;hsa-miR-3929;hsa-miR-4435;NC_000002.12_3880;hsa-miR-98-5p;NC_000017.11_32431;NC_000017.11_32431*;hsa-miR-148a-3p;hsa-miR-6511b-5p;hsa-miR-22-5p;NC_000011.10_24785;NC_000010.11_22289;NC_000010.11_22861;NC_000020.11_34751;hsa-miR-4443;NC_000009.12_21531
TICRR	90381	hsa_circ_0059354	0.644444	1.03864e-36	20	hsa-miR-30d-5p;hsa-miR-193a-5p;NC_000014.9_29046;hsa-miR-27a-3p;NC_000024.10_38844;hsa-miR-24-3p;hsa-miR-6842-3p;hsa-miR-181c-5p;hsa-miR-22-3p;hsa-miR-449c-5p;hsa-miR-3929;hsa-miR-9-5p;hsa-miR-98-5p;hsa-miR-148a-3p;NC_000017.11_32431;hsa-miR-181a-5p;hsa-miR-6511b-5p;hsa-miR-22-5p;hsa-miR-215-3p;NC_000011.10_24785
CLSPN	63967	hsa_circ_0059354	0.688889	1.03864e-36	20	hsa-miR-193a-5p;hsa-miR-27a-3p;NC_000024.10_38844;hsa-miR-24-3p;hsa-miR-6842-3p;hsa-miR-181c-5p;hsa-miR-22-3p;hsa-miR-9-5p;hsa-miR-3929;NC_000002.12_3880;hsa-miR-98-5p;hsa-miR-4758-3p;NC_000017.11_32431;hsa-miR-181a-5p;hsa-miR-22-5p;NC_000010.11_22861;hsa-miR-6511b-5p;hsa-miR-215-3p;NC_000011.10_24785;hsa-miR-4443
XIAP	331	hsa_circ_0076332	0.783784	1.45994e-36	25	NC_000003.12_7520;hsa-miR-573;hsa-miR-3143;NC_000003.12_8583;NC_000003.12_7973;hsa-miR-15b-3p;hsa-miR-5585-3p;NC_000007.14_17821;hsa-miR-522-3p;hsa-miR-34c-5p;hsa-miR-18a-3p;hsa-miR-302a-5p;NC_000010.11_23303;hsa-miR-373-5p;NC_000006.12_15769;hsa-miR-3662;hsa-miR-520c-3p;NC_000008.11_20037*;hsa-miR-372-5p;NC_000013.11_27627;hsa-miR-17-5p;NC_000008.11_19445;hsa-miR-20a-5p;hsa-miR-512-3p;hsa-miR-13…
GPR26	2849	hsa_circ_0008221	0.141827	1.72117e-36	22	hsa-miR-30d-5p;hsa-miR-181a-5p;hsa-miR-155-5p;hsa-miR-27a-3p;hsa-miR-9-5p;hsa-miR-449c-5p;hsa-miR-3929;NC_000019.10_34428;hsa-miR-203a-3p;NC_000011.10_24785;NC_000020.11_34751;hsa-miR-328-3p;hsa-miR-369-3p;hsa-miR-664a-5p;NC_000017.11_32431;hsa-miR-193a-5p;NC_000014.9_29046;hsa-miR-24-3p;hsa-miR-6842-3p;NC_000002.12_3880;hsa-miR-98-5p;NC_000011.10_23882
CBX2	84733	hsa_circ_0008221	0.112981	1.72117e-36	22	hsa-miR-30d-5p;hsa-miR-181a-5p;NC_000010.11_22861;hsa-miR-27a-3p;hsa-miR-22-3p;hsa-miR-9-5p;hsa-miR-3929;NC_000019.10_34428;hsa-miR-203a-3p;hsa-miR-22-5p;NC_000011.10_24785;hsa-miR-328-3p;hsa-miR-181c-5p;hsa-miR-6511b-5p;hsa-miR-193a-5p;NC_000003.12_9115;hsa-miR-24-3p;hsa-miR-6842-3p;NC_000002.12_3880;hsa-miR-98-5p;hsa-miR-4443;NC_000009.12_21531
ESPL1	9700	hsa_circ_0008221	0.100962	1.72117e-36	22	NC_000010.11_22861;hsa-miR-21-5p;hsa-miR-27a-3p;hsa-miR-22-3p;hsa-miR-449c-5p;hsa-miR-3929;hsa-miR-9-5p;hsa-miR-22-5p;NC_000011.10_24785;NC_000020.11_34751;hsa-miR-328-3p;hsa-miR-659-5p;hsa-miR-664a-5p;NC_000017.11_32431;hsa-miR-6511b-5p;hsa-miR-193a-5p;hsa-miR-24-3p;hsa-miR-6842-3p;NC_000002.12_3880;hsa-miR-98-5p;hsa-miR-4443;NC_000009.12_21531
PODXL	5420	hsa_circ_0008221	0.0769231	1.72117e-36	22	hsa-miR-181a-5p;NC_000010.11_22861;hsa-miR-21-5p;hsa-miR-155-5p;hsa-miR-22-3p;hsa-miR-449c-5p;hsa-miR-3929;hsa-miR-9-5p;hsa-miR-203a-3p;NC_000016.10_31515;hsa-miR-22-5p;NC_000011.10_24785;hsa-miR-328-3p;hsa-miR-181c-5p;hsa-miR-664a-5p;hsa-miR-6511b-5p;NC_000014.9_29046;NC_000003.12_9115;hsa-miR-6842-3p;NC_000002.12_3880;hsa-miR-4443;NC_000009.12_21531
POP1	10940	hsa_circ_0008221	0.0817308	1.72348e-36	21	hsa-miR-30d-5p;hsa-miR-21-5p;hsa-miR-155-5p;hsa-miR-27a-3p;NC_000014.9_29046;NC_000003.12_9115;hsa-miR-24-3p;hsa-miR-6842-3p;hsa-miR-181c-5p;hsa-miR-22-3p;hsa-miR-9-5p;hsa-miR-3929;hsa-miR-369-3p;NC_000002.12_3880;hsa-miR-98-5p;NC_000017.11_32431;NC_000019.10_34428;hsa-miR-181a-5p;hsa-miR-6511b-5p;hsa-miR-22-5p;NC_000020.11_34751
SORBS2	8470	hsa_circ_0008221	0.0913462	1.72348e-36	21	hsa-miR-499a-5p;hsa-miR-193a-5p;hsa-miR-27a-3p;hsa-miR-24-3p;hsa-miR-6842-3p;hsa-miR-22-3p;NC_000016.10_31213;hsa-miR-3929;hsa-miR-664a-5p;hsa-miR-98-5p;NC_000017.11_32431;NC_000019.10_34428;hsa-miR-203a-3p;hsa-miR-181a-5p;hsa-miR-22-5p;NC_000010.11_22861;hsa-miR-6511b-5p;NC_000011.10_23882;NC_000011.10_24785;hsa-miR-4443;NC_000009.12_21531
GALNT5	11227	hsa_circ_0076332	0.756757	3.08439e-36	26	NC_000003.12_7520;hsa-miR-573;hsa-miR-3143;NC_000003.12_8583;NC_000003.12_7973;hsa-miR-5585-3p;NC_000007.14_17821;hsa-miR-34c-5p;hsa-miR-18a-3p;hsa-miR-302a-5p;NC_000010.11_23303;hsa-miR-373-5p;NC_000006.12_15769;hsa-miR-3662;hsa-miR-520c-3p;NC_000008.11_20037*;hsa-miR-372-5p;NC_000013.11_27627;hsa-miR-17-5p;NC_000008.11_19445;NC_000018.10_33742;hsa-miR-20a-5p;hsa-miR-512-3p;hsa-miR-302b-5p;hsa-m…
ADAM20	8748	hsa_circ_0053716	0.690909	3.49222e-36	26	hsa-miR-548i;hsa-miR-5585-3p;hsa-miR-3529-3p;NC_000007.14_17821;hsa-miR-3155a;NC_000021.9_35751;NC_000004.12_9958;NC_000023.11_38289;hsa-miR-7974;NC_000003.12_9133;NC_000010.11_23303;NC_000009.12_20733;NC_000002.12_3238;hsa-miR-3662;hsa-miR-520a-3p;hsa-miR-92a-3p;hsa-miR-302c-5p;NC_000001.11_3101;NC_000010.11_23646;hsa-miR-92a-1-5p;hsa-miR-372-5p;hsa-let-7c-5p;hsa-miR-512-3p;hsa-miR-510-5p;hsa-mi…
RAI1	10743	hsa_circ_0086848	0.55102	3.99898e-36	18	hsa-miR-328-3p;hsa-miR-193a-5p;hsa-miR-4443;hsa-miR-24-3p;hsa-miR-659-5p;hsa-miR-6842-3p;NC_000005.10_13790;hsa-miR-9-5p;hsa-miR-22-3p;hsa-miR-3929;hsa-miR-449c-5p;hsa-miR-369-3p;hsa-miR-148a-3p;NC_000017.11_32431;hsa-miR-6511b-5p;hsa-miR-22-5p;NC_000011.10_23882;hsa-miR-183-5p
MYT1L	23040	hsa_circ_0006957	0.112245	4.38984e-36	21	hsa-miR-30d-5p;hsa-miR-193a-5p;hsa-miR-155-5p;hsa-miR-27a-3p;NC_000014.9_29046;NC_000003.12_9115;hsa-miR-215-5p;hsa-miR-24-3p;hsa-miR-659-5p;hsa-miR-22-3p;hsa-miR-449c-5p;NC_000016.10_31213;hsa-miR-3929;hsa-miR-9-5p;hsa-miR-664a-5p;NC_000012.12_26540;NC_000019.10_34428;hsa-miR-22-5p;NC_000010.11_22861;NC_000011.10_24785;NC_000020.11_34751
LZTS1	11178	hsa_circ_0008221	0.139423	4.84926e-36	22	hsa-miR-30d-5p;hsa-miR-9-5p;hsa-miR-22-3p;hsa-miR-3929;NC_000016.10_31515;hsa-miR-22-5p;NC_000011.10_24785;NC_000020.11_34751;hsa-miR-328-3p;hsa-miR-659-5p;hsa-miR-664a-5p;NC_000017.11_32431;hsa-miR-6511b-5p;hsa-miR-193a-5p;NC_000014.9_29046;NC_000003.12_9115;hsa-miR-24-3p;hsa-miR-6842-3p;NC_000002.12_3880;hsa-miR-98-5p;hsa-miR-4443;NC_000009.12_21531
PRICKLE2	166336	hsa_circ_0059354	0.733333	5.42874e-36	21	hsa-miR-193a-5p;NC_000014.9_29046;hsa-miR-27a-3p;hsa-miR-24-3p;hsa-miR-6842-3p;hsa-miR-181c-5p;hsa-miR-22-3p;hsa-miR-449c-5p;hsa-miR-3929;hsa-miR-9-5p;NC_000002.12_3880;hsa-miR-98-5p;NC_000017.11_32431;hsa-miR-4758-3p;hsa-miR-181a-5p;hsa-miR-22-5p;NC_000010.11_22861;hsa-miR-6511b-5p;hsa-miR-215-3p;NC_000011.10_24785;hsa-miR-4443
JADE2	23338	hsa_circ_0059354	0.511111	6.42355e-36	19	hsa-miR-30d-5p;hsa-miR-193a-5p;NC_000014.9_29046;hsa-miR-27a-3p;hsa-miR-24-3p;hsa-miR-6842-3p;hsa-miR-181c-5p;hsa-miR-22-3p;hsa-miR-449c-5p;NC_000016.10_31213;hsa-miR-3929;hsa-miR-9-5p;NC_000002.12_3880;NC_000017.11_32431;hsa-miR-181a-5p;hsa-miR-6511b-5p;hsa-miR-22-5p;NC_000011.10_24785;hsa-miR-4443
FBXO32	114907	hsa_circ_0076332	0.675676	7.30365e-36	24	NC_000003.12_7520;hsa-miR-573;hsa-miR-3143;NC_000003.12_8583;NC_000003.12_7973;hsa-miR-15b-3p;NC_000007.14_17821;hsa-miR-34c-5p;hsa-miR-18a-3p;hsa-miR-302a-5p;NC_000010.11_23303;hsa-miR-373-5p;NC_000012.12_26286;NC_000006.12_15769;hsa-miR-3662;hsa-miR-520c-3p;hsa-miR-372-5p;NC_000013.11_27627;hsa-miR-17-5p;NC_000008.11_19445;hsa-miR-20a-5p;hsa-miR-512-3p;hsa-miR-1323;NC_000008.11_20037
GALNT5	11227	hsa_circ_0059713	0.731707	8.931e-36	27	hsa-miR-573;hsa-miR-548i;hsa-miR-3529-3p;hsa-miR-34c-5p;NC_000006.12_16700;hsa-miR-302a-5p;NC_000003.12_9133;hsa-miR-373-5p;NC_000018.10_33504*;hsa-miR-526b-5p;NC_000002.12_3238;NC_000006.12_15769;NC_000018.10_33037;hsa-miR-3662;NC_000009.12_21957;NC_000001.11_2997;NC_000010.11_23646;NC_000016.10_31157;NC_000022.11_36437;hsa-miR-7-5p;hsa-miR-205-5p;hsa-miR-372-5p;hsa-miR-20a-5p;NC_000011.10_25384…
RAI1	10743	hsa_circ_0008221	0.100962	1.18017e-35	20	hsa-miR-328-3p;hsa-miR-193a-5p;hsa-miR-21-5p;NC_000014.9_29046;NC_000003.12_9115;hsa-miR-24-3p;hsa-miR-659-5p;hsa-miR-6842-3p;hsa-miR-369-3p;hsa-miR-9-5p;hsa-miR-22-3p;hsa-miR-449c-5p;hsa-miR-3929;hsa-miR-664a-5p;NC_000017.11_32431;hsa-miR-6511b-5p;hsa-miR-22-5p;NC_000011.10_23882;NC_000011.10_24785;hsa-miR-4443
TGFBR2	7048	hsa_circ_0008221	0.0985577	1.18017e-35	20	hsa-miR-30d-5p;hsa-miR-21-5p;hsa-miR-155-5p;hsa-miR-27a-3p;NC_000003.12_9115;hsa-miR-659-5p;hsa-miR-181c-5p;hsa-miR-22-3p;hsa-miR-449c-5p;NC_000016.10_31213;hsa-miR-3929;hsa-miR-9-5p;hsa-miR-369-3p;NC_000017.11_32431;hsa-miR-98-5p;hsa-miR-203a-3p;hsa-miR-181a-5p;hsa-miR-6511b-5p;hsa-miR-22-5p;hsa-miR-4443
SMC1A	8243	hsa_circ_0086848	0.591837	1.27977e-35	20	hsa-miR-328-3p;hsa-miR-193a-5p;hsa-miR-4443;hsa-miR-24-3p;hsa-miR-659-5p;hsa-miR-6842-3p;NC_000005.10_13790;hsa-miR-9-5p;hsa-miR-22-3p;hsa-miR-3929;hsa-miR-4435;hsa-miR-98-5p;hsa-miR-148a-3p;NC_000017.11_32431;NC_000019.10_34428;hsa-miR-203a-3p;hsa-miR-6511b-5p;hsa-miR-22-5p;NC_000011.10_23882;hsa-miR-183-5p
TLCD2	727910	hsa_circ_0059713	0.658537	1.34201e-35	24	hsa-miR-548i;NC_000006.12_16700;hsa-miR-302a-5p;NC_000023.11_36905;NC_000021.9_35751;hsa-miR-7974;NC_000003.12_9133;hsa-miR-373-5p;NC_000018.10_33504*;NC_000009.12_21925;hsa-miR-526b-5p;NC_000002.12_3238;NC_000006.12_15769;hsa-miR-3662;hsa-miR-92a-3p;NC_000009.12_21957;NC_000001.11_2997;NC_000022.11_36437;hsa-miR-7-5p;hsa-miR-205-5p;hsa-miR-20a-5p;NC_000011.10_25384;NC_000003.12_7276;hsa-miR-371a…
RSAD2	91543	hsa_circ_0008221	0.0673077	2.05777e-35	21	hsa-miR-328-3p;hsa-miR-30d-5p;hsa-miR-21-5p;hsa-miR-499a-5p;hsa-miR-27a-3p;hsa-miR-193a-5p;NC_000003.12_9115;hsa-miR-215-5p;hsa-miR-24-3p;hsa-miR-6842-3p;hsa-miR-369-3p;hsa-miR-9-5p;hsa-miR-449c-5p;hsa-miR-98-5p;hsa-miR-664a-5p;NC_000017.11_32431;hsa-miR-203a-3p;hsa-miR-22-5p;NC_000020.11_34751;hsa-miR-4443;NC_000009.12_21531
MAP3K2	10746	hsa_circ_0059713	0.682927	2.15966e-35	26	hsa-miR-573;hsa-miR-582-5p;hsa-miR-3529-3p;hsa-miR-34c-5p;NC_000023.11_36905;NC_000003.12_9133;NC_000018.10_33504*;NC_000009.12_21925;hsa-miR-526b-5p;NC_000002.12_3238;NC_000006.12_15769;NC_000018.10_33037;hsa-miR-3662;NC_000009.12_21957;NC_000010.11_23646;NC_000016.10_31157;NC_000022.11_36437;hsa-miR-7-5p;hsa-miR-205-5p;hsa-miR-372-5p;hsa-miR-20a-5p;NC_000011.10_25384;NC_000003.12_7276;hsa-miR-3…
AHNAK2	113146	hsa_circ_0059713	0.682927	3.20979e-35	25	hsa-miR-573;hsa-miR-582-5p;NC_000006.12_16700;NC_000023.11_36905;hsa-miR-302a-5p;hsa-miR-7974;NC_000003.12_9133;hsa-miR-373-5p;NC_000009.12_21925;hsa-miR-526b-5p;NC_000002.12_3238;NC_000006.12_15769;NC_000018.10_33037;hsa-miR-3662;hsa-miR-92a-3p;NC_000001.11_2997;NC_000010.11_23646;NC_000022.11_36437;hsa-miR-7-5p;hsa-miR-205-5p;hsa-miR-372-5p;NC_000011.10_25384;NC_000003.12_7276;hsa-miR-371a-5p;h…
PIK3CA	5290	hsa_circ_0059713	0.707317	3.31801e-35	26	hsa-miR-573;hsa-miR-548i;hsa-miR-582-5p;hsa-miR-302a-5p;hsa-miR-7974;NC_000003.12_9133;hsa-miR-373-5p;NC_000018.10_33504*;hsa-miR-526b-5p;NC_000002.12_3238;NC_000006.12_15769;NC_000018.10_33037;hsa-miR-3662;NC_000005.10_11919>NC_000005.10_11920;hsa-miR-92a-3p;NC_000009.12_21957;NC_000010.11_23646;NC_000016.10_31157;NC_000022.11_36437;hsa-miR-7-5p;hsa-miR-205-5p;hsa-miR-372-5p;hsa-miR-20a-5p;NC_00…
CISH	1154	hsa_circ_0059354	0.533333	4.50554e-35	19	NC_000014.9_29046;hsa-miR-27a-3p;hsa-miR-24-3p;hsa-miR-6842-3p;hsa-miR-181c-5p;hsa-miR-22-3p;hsa-miR-449c-5p;hsa-miR-3929;hsa-miR-9-5p;hsa-miR-98-5p;hsa-miR-148a-3p;NC_000017.11_32431;hsa-miR-181a-5p;hsa-miR-22-5p;NC_000010.11_22861;hsa-miR-6511b-5p;hsa-miR-215-3p;NC_000011.10_24785;hsa-miR-4443
KIF14	9928	hsa_circ_0008221	0.0889423	4.93918e-35	19	hsa-miR-30d-5p;hsa-miR-193a-5p;hsa-miR-155-5p;NC_000003.12_9115;hsa-miR-181c-5p;hsa-miR-9-5p;hsa-miR-22-3p;hsa-miR-369-3p;hsa-miR-664a-5p;NC_000002.12_3880;hsa-miR-98-5p;NC_000017.11_32431;hsa-miR-203a-3p;hsa-miR-181a-5p;NC_000004.12_10963;hsa-miR-22-5p;NC_000011.10_24785;NC_000020.11_34751;NC_000009.12_21531
ATAD2	29028	hsa_circ_0008221	0.0769231	4.93918e-35	19	hsa-miR-328-3p;hsa-miR-30d-5p;hsa-miR-193a-5p;hsa-miR-27a-3p;NC_000003.12_9115;hsa-miR-24-3p;hsa-miR-659-5p;hsa-miR-6842-3p;NC_000002.12_3880;hsa-miR-3929;NC_000016.10_31213;hsa-miR-664a-5p;hsa-miR-98-5p;NC_000017.11_32431;hsa-miR-22-5p;hsa-miR-6511b-5p;NC_000016.10_31515;NC_000011.10_24785;NC_000009.12_21531
SERTAD4	56256	hsa_circ_0008221	0.0600962	5.08176e-35	20	hsa-miR-328-3p;hsa-miR-30d-5p;hsa-miR-499a-5p;hsa-miR-155-5p;hsa-miR-27a-3p;hsa-miR-193a-5p;hsa-miR-6842-3p;hsa-miR-181c-5p;hsa-miR-9-5p;hsa-miR-664a-5p;NC_000017.11_32431;hsa-miR-203a-3p;hsa-miR-181a-5p;hsa-miR-22-5p;NC_000010.11_22861;hsa-miR-6511b-5p;NC_000011.10_24785;NC_000020.11_34751;hsa-miR-4443;NC_000009.12_21531
PSD3	23362	hsa_circ_0059354	0.622222	5.09499e-35	20	hsa-miR-30d-5p;hsa-miR-193a-5p;NC_000014.9_29046;hsa-miR-27a-3p;NC_000024.10_38844;hsa-miR-6842-3p;hsa-miR-181c-5p;hsa-miR-22-3p;hsa-miR-9-5p;hsa-miR-3929;NC_000002.12_3880;hsa-miR-98-5p;NC_000017.11_32431;hsa-miR-181a-5p;hsa-miR-22-5p;NC_000010.11_22861;hsa-miR-6511b-5p;hsa-miR-215-3p;NC_000011.10_24785;hsa-miR-4443
RHBDD1	84236	hsa_circ_0059713	0.634146	5.24731e-35	25	hsa-miR-573;hsa-miR-3529-3p;hsa-miR-34c-5p;NC_000006.12_16700;hsa-miR-302a-5p;NC_000023.11_36905;hsa-miR-7974;NC_000003.12_9133;hsa-miR-373-5p;NC_000018.10_33504*;NC_000009.12_21925;NC_000002.12_3238;NC_000006.12_15769;NC_000018.10_33037;hsa-miR-3662;hsa-miR-92a-3p;NC_000009.12_21957;NC_000016.10_31157;hsa-miR-7-5p;NC_000022.11_36437;hsa-miR-20a-5p;NC_000011.10_25384;NC_000003.12_7276;hsa-miR-371…
ESPL1	9700	hsa_circ_0052203	0.638889	6.27872e-35	19	NC_000024.10_38844;hsa-miR-6842-3p;hsa-miR-22-3p;hsa-miR-449c-5p;hsa-miR-3929;hsa-miR-4435;NC_000002.12_3880;hsa-miR-98-5p;NC_000017.11_32431;NC_000017.11_32431*;hsa-miR-6511b-5p;hsa-miR-642a-5p;hsa-miR-22-5p;NC_000011.10_24785;NC_000010.11_22289;NC_000010.11_22861;NC_000020.11_34751;hsa-miR-4443;NC_000009.12_21531
TRMT5	57570	hsa_circ_0008221	0.0745192	6.341e-35	21	hsa-miR-30d-5p;hsa-miR-193a-5p;hsa-miR-155-5p;hsa-miR-27a-3p;NC_000016.10_31515;NC_000003.12_9115;hsa-miR-24-3p;hsa-miR-6842-3p;hsa-miR-181c-5p;hsa-miR-22-3p;hsa-miR-449c-5p;hsa-miR-9-5p;hsa-miR-369-3p;hsa-miR-664a-5p;hsa-miR-98-5p;NC_000017.11_32431;hsa-miR-203a-3p;hsa-miR-181a-5p;hsa-miR-22-5p;NC_000011.10_23882;NC_000009.12_21531
ZRANB3	84083	hsa_circ_0008221	0.0889423	6.341e-35	21	hsa-miR-328-3p;hsa-miR-30d-5p;hsa-miR-499a-5p;hsa-miR-155-5p;hsa-miR-27a-3p;hsa-miR-193a-5p;NC_000014.9_29046;hsa-miR-215-5p;NC_000003.12_9115;hsa-miR-6842-3p;hsa-miR-369-3p;hsa-miR-9-5p;hsa-miR-449c-5p;NC_000016.10_31213;hsa-miR-664a-5p;hsa-miR-98-5p;hsa-miR-6511b-5p;NC_000010.11_22861;NC_000011.10_23882;NC_000020.11_34751;NC_000009.12_21531
SMC1A	8243	hsa_circ_0052203	0.722222	7.6159e-35	20	NC_000014.9_29046;hsa-miR-26b-5p;hsa-miR-6842-3p;hsa-miR-181c-5p;hsa-miR-22-3p;NC_000002.12_3880;hsa-miR-3929;hsa-miR-4435;hsa-miR-98-5p;hsa-miR-148a-3p;NC_000017.11_32431;NC_000017.11_32431*;hsa-miR-6511b-5p;hsa-miR-642a-5p;hsa-miR-22-5p;NC_000011.10_24785;NC_000010.11_22289;NC_000020.11_34751;hsa-miR-4443;NC_000009.12_21531
CROT	54677	hsa_circ_0008221	0.0721154	8.35064e-35	18	hsa-miR-30d-5p;hsa-miR-499a-5p;hsa-miR-155-5p;NC_000003.12_9115;hsa-miR-659-5p;hsa-miR-181c-5p;NC_000002.12_3880;hsa-miR-22-3p;NC_000016.10_31213;hsa-miR-3929;hsa-miR-9-5p;hsa-miR-98-5p;NC_000017.11_32431;hsa-miR-203a-3p;hsa-miR-181a-5p;hsa-miR-22-5p;NC_000020.11_34751;hsa-miR-4443
GPCPD1	56261	hsa_circ_0059713	0.707317	8.49442e-35	25	hsa-miR-573;hsa-miR-548i;hsa-miR-582-5p;hsa-miR-3529-3p;hsa-miR-34c-5p;NC_000006.12_16700;NC_000023.11_36905;hsa-miR-7974;NC_000003.12_9133;hsa-miR-373-5p;NC_000018.10_33504*;hsa-miR-526b-5p;NC_000002.12_3238;NC_000006.12_15769;NC_000018.10_33037;hsa-miR-3662;hsa-miR-92a-3p;NC_000016.10_31157;NC_000022.11_36437;hsa-miR-205-5p;hsa-miR-372-5p;hsa-miR-20a-5p;NC_000011.10_25384;hsa-miR-371a-5p;hsa-mi…
CLDN12	9069	hsa_circ_0053716	0.454545	9.35155e-35	20	NC_000007.14_17824;NC_000002.12_3238;hsa-miR-3662;hsa-miR-3155a;NC_000021.9_35751;NC_000004.12_9958;NC_000023.11_38289;hsa-miR-7974;hsa-miR-302c-5p;hsa-let-7c-5p;NC_000010.11_23646;hsa-miR-512-3p;hsa-miR-548i;NC_000018.10_33504*;hsa-miR-302b-5p;hsa-miR-15b-3p;hsa-miR-5585-3p;hsa-miR-1323;hsa-miR-3529-3p;NC_000007.14_17821
NAV2	89797	hsa_circ_0006957	0.187075	1.24772e-34	21	hsa-miR-30d-5p;hsa-miR-21-5p;hsa-miR-155-5p;hsa-miR-27a-3p;hsa-miR-193a-5p;NC_000003.12_9115;hsa-miR-24-3p;hsa-miR-6807-5p;NC_000001.11_1021;hsa-miR-22-3p;hsa-miR-3929;hsa-miR-449c-5p;hsa-miR-9-5p;hsa-miR-5701;NC_000012.12_26540;NC_000019.10_34428;hsa-miR-664a-5p;hsa-miR-22-5p;NC_000010.11_22861;NC_000011.10_24785;NC_000020.11_34751
PRICKLE2	166336	hsa_circ_0006957	0.190476	1.24772e-34	21	hsa-miR-193a-5p;hsa-miR-21-5p;hsa-miR-155-5p;hsa-miR-27a-3p;NC_000014.9_29046;hsa-miR-215-5p;hsa-miR-24-3p;hsa-miR-659-5p;NC_000001.11_1021;hsa-miR-22-3p;hsa-miR-3929;hsa-miR-449c-5p;hsa-miR-9-5p;hsa-miR-664a-5p;NC_000012.12_26540;NC_000019.10_34428;hsa-miR-22-5p;NC_000010.11_22861;NC_000011.10_23882;NC_000011.10_24785;NC_000020.11_34751
MAP2	4133	hsa_circ_0076332	0.702703	1.34394e-34	25	NC_000003.12_7520;hsa-miR-573;hsa-miR-3143;NC_000003.12_8583;NC_000003.12_7973;hsa-miR-15b-3p;hsa-miR-5585-3p;NC_000007.14_17821;hsa-miR-34c-5p;hsa-miR-302a-5p;NC_000010.11_23303;hsa-miR-373-5p;NC_000012.12_26286;NC_000006.12_15769;hsa-miR-3662;hsa-miR-520c-3p;hsa-miR-27b-5p;hsa-miR-372-5p;NC_000013.11_27627;hsa-miR-17-5p;NC_000008.11_19445;hsa-miR-20a-5p;hsa-miR-512-3p;hsa-miR-302b-5p;NC_000008.…
DOPEY2	9980	hsa_circ_0059713	0.682927	1.36219e-34	25	hsa-miR-548i;hsa-miR-3529-3p;hsa-miR-34c-5p;NC_000006.12_16700;hsa-miR-302a-5p;NC_000023.11_36905;NC_000021.9_35751;hsa-miR-7974;NC_000003.12_9133;hsa-miR-373-5p;NC_000018.10_33504*;NC_000009.12_21925;hsa-miR-526b-5p;NC_000002.12_3238;NC_000018.10_33037;hsa-miR-3662;NC_000005.10_11919>NC_000005.10_11920;NC_000009.12_21957;NC_000001.11_2997;NC_000010.11_23646;hsa-miR-7-5p;NC_000022.11_36437;hsa-mi…
PRSS23	11098	hsa_circ_0008221	0.0817308	1.83364e-34	21	hsa-miR-328-3p;hsa-miR-30d-5p;hsa-miR-21-5p;hsa-miR-155-5p;hsa-miR-27a-3p;NC_000003.12_9115;hsa-miR-24-3p;hsa-miR-6842-3p;hsa-miR-181c-5p;NC_000002.12_3880;hsa-miR-3929;hsa-miR-664a-5p;hsa-miR-98-5p;NC_000017.11_32431;NC_000019.10_34428;hsa-miR-203a-3p;hsa-miR-181a-5p;hsa-miR-6511b-5p;NC_000011.10_23882;NC_000011.10_24785;NC_000020.11_34751
CASC5		hsa_circ_0008221	0.112981	1.83364e-34	21	hsa-miR-30d-5p;hsa-miR-21-5p;hsa-miR-155-5p;hsa-miR-27a-3p;hsa-miR-499a-5p;hsa-miR-193a-5p;NC_000014.9_29046;NC_000003.12_9115;hsa-miR-24-3p;hsa-miR-181c-5p;hsa-miR-9-5p;hsa-miR-369-3p;hsa-miR-3929;hsa-miR-664a-5p;NC_000002.12_3880;hsa-miR-203a-3p;hsa-miR-181a-5p;hsa-miR-6511b-5p;hsa-miR-22-5p;NC_000011.10_24785;NC_000009.12_21531
PLXDC1	57125	hsa_circ_0053716	0.454545	1.83364e-34	21	NC_000007.14_17824;NC_000019.10_34542;hsa-miR-520a-3p;NC_000002.12_3238;hsa-miR-92a-3p;hsa-miR-3155a;hsa-miR-7974;hsa-miR-302c-5p;hsa-let-7c-5p;NC_000010.11_23303;NC_000001.11_3101;NC_000010.11_23646;hsa-miR-3677-5p;hsa-miR-548i;hsa-miR-92a-1-5p;NC_000009.12_20733;hsa-miR-512-3p;hsa-miR-510-5p;hsa-miR-302b-5p;hsa-miR-5585-3p;NC_000008.11_20037
ANK2	287	hsa_circ_0076332	0.783784	1.8688e-34	26	NC_000003.12_7520;hsa-miR-573;hsa-miR-3143;NC_000003.12_8583;NC_000003.12_7973;hsa-miR-15b-3p;hsa-miR-5585-3p;NC_000007.14_17821;hsa-miR-34c-5p;NC_000010.11_23303;hsa-miR-373-5p;NC_000012.12_26286;NC_000006.12_15769;hsa-miR-3662;hsa-miR-520c-3p;NC_000008.11_20037*;hsa-miR-548j-3p;hsa-miR-27b-5p;hsa-miR-372-5p;NC_000013.11_27627;hsa-miR-17-5p;NC_000008.11_19445;NC_000018.10_33742;hsa-miR-20a-5p;hs…
OAS3	4940	hsa_circ_0008221	0.115385	1.92292e-34	22	hsa-miR-215-5p;hsa-miR-499a-5p;hsa-miR-9-5p;hsa-miR-22-3p;hsa-miR-449c-5p;hsa-miR-3929;NC_000019.10_34428;hsa-miR-203a-3p;hsa-miR-22-5p;NC_000011.10_24785;NC_000020.11_34751;hsa-miR-328-3p;hsa-miR-181c-5p;hsa-miR-664a-5p;NC_000017.11_32431;hsa-miR-6511b-5p;hsa-miR-193a-5p;hsa-miR-24-3p;hsa-miR-6842-3p;NC_000002.12_3880;hsa-miR-4443;NC_000009.12_21531
ABCC4	10257	hsa_circ_0076332	0.72973	1.93467e-34	24	hsa-miR-573;hsa-miR-3143;NC_000003.12_8583;NC_000003.12_7973;hsa-miR-15b-3p;NC_000007.14_17821;hsa-miR-522-3p;hsa-miR-18a-3p;NC_000010.11_23303;hsa-miR-373-5p;NC_000012.12_26286;NC_000006.12_15769;hsa-miR-3662;hsa-miR-520c-3p;NC_000008.11_20037*;hsa-miR-372-5p;NC_000013.11_27627;hsa-miR-17-5p;NC_000008.11_19445;NC_000018.10_33742;hsa-miR-512-3p;hsa-miR-302b-5p;hsa-miR-1323;NC_000008.11_20037
TNFRSF19	55504	hsa_circ_0008221	0.0625	1.94772e-34	20	hsa-miR-30d-5p;hsa-miR-499a-5p;hsa-miR-155-5p;hsa-miR-27a-3p;hsa-miR-193a-5p;NC_000003.12_9115;hsa-miR-24-3p;hsa-miR-6842-3p;hsa-miR-369-3p;hsa-miR-22-3p;hsa-miR-449c-5p;hsa-miR-3929;hsa-miR-9-5p;hsa-miR-98-5p;hsa-miR-203a-3p;hsa-miR-6511b-5p;NC_000010.11_22861;NC_000011.10_23882;NC_000011.10_24785;hsa-miR-4443
PDGFRA	5156	hsa_circ_0008221	0.0841346	1.94772e-34	20	hsa-miR-328-3p;hsa-miR-499a-5p;hsa-miR-27a-3p;hsa-miR-24-3p;hsa-miR-6842-3p;hsa-miR-181c-5p;hsa-miR-9-5p;hsa-miR-449c-5p;hsa-miR-3929;hsa-miR-664a-5p;NC_000002.12_3880;hsa-miR-98-5p;NC_000017.11_32431;hsa-miR-203a-3p;hsa-miR-181a-5p;hsa-miR-22-5p;NC_000010.11_22861;hsa-miR-6511b-5p;NC_000011.10_24785;NC_000009.12_21531
COL28A1	340267	hsa_circ_0059354	0.511111	1.98205e-34	20	hsa-miR-30d-5p;hsa-miR-193a-5p;NC_000014.9_29046;hsa-miR-27a-3p;NC_000024.10_38844;hsa-miR-24-3p;hsa-miR-181c-5p;hsa-miR-22-3p;hsa-miR-9-5p;hsa-miR-3929;NC_000002.12_3880;hsa-miR-98-5p;hsa-miR-4758-3p;hsa-miR-181a-5p;hsa-miR-22-5p;NC_000010.11_22861;hsa-miR-6511b-5p;hsa-miR-215-3p;NC_000011.10_24785;hsa-miR-4443
SH2B3	10019	hsa_circ_0059713	0.658537	2.16474e-34	25	hsa-miR-582-5p;hsa-miR-3529-3p;NC_000006.12_16700;NC_000023.11_36905;hsa-miR-302a-5p;hsa-miR-7974;NC_000003.12_9133;hsa-miR-373-5p;NC_000018.10_33504*;NC_000009.12_21925;NC_000002.12_3238;NC_000006.12_15769;NC_000018.10_33037;hsa-miR-3662;NC_000005.10_11919>NC_000005.10_11920;hsa-miR-92a-3p;NC_000009.12_21957;NC_000016.10_31157;NC_000022.11_36437;hsa-miR-7-5p;hsa-miR-205-5p;hsa-miR-20a-5p;NC_0000…
CLHC1	130162	hsa_circ_0059713	0.658537	2.31869e-34	24	hsa-miR-573;hsa-miR-582-5p;hsa-miR-3529-3p;NC_000023.11_36905;hsa-miR-302a-5p;NC_000021.9_35751;hsa-miR-7974;NC_000003.12_9133;hsa-miR-373-5p;hsa-miR-526b-5p;NC_000002.12_3238;hsa-miR-3662;NC_000005.10_11919>NC_000005.10_11920;NC_000016.10_31157;NC_000022.11_36437;hsa-miR-7-5p;hsa-miR-205-5p;hsa-miR-372-5p;hsa-miR-20a-5p;NC_000011.10_25384;NC_000003.12_7276;hsa-miR-371a-5p;hsa-miR-1323;NC_000008.…
RGS3	5998	hsa_circ_0086848	0.77551	2.41805e-34	20	hsa-miR-328-3p;hsa-miR-193a-5p;hsa-miR-24-3p;hsa-miR-659-5p;hsa-miR-6842-3p;hsa-miR-9-5p;hsa-miR-22-3p;hsa-miR-449c-5p;hsa-miR-3929;hsa-miR-4435;hsa-miR-98-5p;NC_000017.11_32431;NC_000019.10_34428;hsa-miR-203a-3p;hsa-miR-22-5p;hsa-miR-6511b-5p;NC_000010.11_22861;hsa-miR-148a-3p;NC_000011.10_23882;hsa-miR-4443
CBX2	84733	hsa_circ_0059354	0.622222	2.60256e-34	19	hsa-miR-30d-5p;hsa-miR-193a-5p;hsa-miR-27a-3p;hsa-miR-24-3p;hsa-miR-6842-3p;hsa-miR-181c-5p;hsa-miR-22-3p;hsa-miR-9-5p;hsa-miR-3929;NC_000002.12_3880;hsa-miR-98-5p;hsa-miR-4758-3p;hsa-miR-181a-5p;hsa-miR-22-5p;NC_000010.11_22861;hsa-miR-6511b-5p;hsa-miR-215-3p;NC_000011.10_24785;hsa-miR-4443
MYT1L	23040	hsa_circ_0012566	0.8	3.65682e-34	19	hsa-miR-30d-5p;hsa-miR-499a-5p;hsa-miR-193a-5p;NC_000003.12_9115;NW_003315954.1_39634;hsa-miR-24-3p;hsa-miR-181c-5p;hsa-miR-22-3p;hsa-miR-449c-5p;NC_000016.10_31213;hsa-miR-9-5p;hsa-miR-664a-5p;hsa-miR-203a-3p;hsa-miR-181a-5p;hsa-miR-22-5p;NC_000010.11_22861;NC_000008.11_18787;hsa-miR-6511b-5p;NC_000009.12_21531
SMC1A	8243	hsa_circ_0059354	0.577778	3.77684e-34	20	hsa-miR-30d-5p;hsa-miR-193a-5p;NC_000014.9_29046;hsa-miR-27a-3p;hsa-miR-24-3p;hsa-miR-6842-3p;hsa-miR-181c-5p;hsa-miR-9-5p;hsa-miR-22-3p;hsa-miR-3929;NC_000002.12_3880;hsa-miR-98-5p;hsa-miR-148a-3p;NC_000017.11_32431;hsa-miR-181a-5p;hsa-miR-6511b-5p;hsa-miR-22-5p;hsa-miR-215-3p;NC_000011.10_24785;hsa-miR-4443
KLHL5	51088	hsa_circ_0059713	0.634146	3.93893e-34	24	hsa-miR-573;hsa-miR-548i;hsa-miR-582-5p;hsa-miR-3529-3p;NC_000006.12_16700;NC_000023.11_36905;hsa-miR-302a-5p;NC_000021.9_35751;NC_000003.12_9133;NC_000018.10_33504*;NC_000002.12_3238;NC_000006.12_15769;NC_000018.10_33037;hsa-miR-3662;NC_000009.12_21957;NC_000010.11_23646;NC_000016.10_31157;NC_000022.11_36437;hsa-miR-7-5p;hsa-miR-205-5p;hsa-miR-372-5p;hsa-miR-20a-5p;NC_000011.10_25384;NC_000003.1…
RGS3	5998	hsa_circ_0006957	0.170068	4.13143e-34	21	hsa-miR-30d-5p;hsa-miR-21-5p;hsa-miR-155-5p;hsa-miR-27a-3p;hsa-miR-193a-5p;NC_000014.9_29046;hsa-miR-215-5p;NC_000003.12_9115;hsa-miR-659-5p;hsa-miR-24-3p;hsa-miR-6807-5p;hsa-miR-22-3p;hsa-miR-449c-5p;hsa-miR-3929;hsa-miR-9-5p;NC_000019.10_34428;hsa-miR-22-5p;NC_000010.11_22861;NC_000011.10_23882;NC_000011.10_24785;NC_000020.11_34751
PDGFRA	5156	hsa_circ_0059354	0.511111	5.5126e-34	18	hsa-miR-27a-3p;NC_000024.10_38844;hsa-miR-24-3p;hsa-miR-6842-3p;hsa-miR-181c-5p;hsa-miR-9-5p;hsa-miR-449c-5p;hsa-miR-3929;NC_000002.12_3880;hsa-miR-98-5p;hsa-miR-148a-3p;NC_000017.11_32431;hsa-miR-181a-5p;hsa-miR-22-5p;NC_000010.11_22861;hsa-miR-6511b-5p;hsa-miR-215-3p;NC_000011.10_24785
MCM8	84515	hsa_circ_0008221	0.0913462	5.68972e-34	17	hsa-miR-193a-5p;hsa-miR-155-5p;hsa-miR-215-5p;hsa-miR-24-3p;hsa-miR-181c-5p;NC_000002.12_3880;hsa-miR-22-3p;hsa-miR-369-3p;hsa-miR-3929;hsa-miR-9-5p;hsa-miR-98-5p;hsa-miR-203a-3p;NC_000004.12_10963;hsa-miR-22-5p;NC_000011.10_24785;hsa-miR-4443;NC_000009.12_21531
FAM111A	63901	hsa_circ_0008221	0.0528846	5.68972e-34	17	hsa-miR-193a-5p;hsa-miR-155-5p;hsa-miR-24-3p;hsa-miR-659-5p;hsa-miR-6842-3p;hsa-miR-181c-5p;hsa-miR-369-3p;hsa-miR-9-5p;NC_000016.10_31213;hsa-miR-3929;hsa-miR-664a-5p;hsa-miR-98-5p;NC_000019.10_34428;hsa-miR-181a-5p;NC_000004.12_10963;hsa-miR-6511b-5p;NC_000009.12_21531
PLCE1	51196	hsa_circ_0059354	0.6	5.88599e-34	19	hsa-miR-30d-5p;hsa-miR-27a-3p;NC_000024.10_38844;hsa-miR-24-3p;hsa-miR-6842-3p;hsa-miR-181c-5p;hsa-miR-22-3p;hsa-miR-9-5p;hsa-miR-3929;NC_000002.12_3880;hsa-miR-98-5p;hsa-miR-4758-3p;NC_000017.11_32431;hsa-miR-181a-5p;hsa-miR-22-5p;NC_000010.11_22861;hsa-miR-6511b-5p;hsa-miR-215-3p;NC_000011.10_24785
IFIT1	3434	hsa_circ_0008221	0.0673077	6.77394e-34	20	hsa-miR-30d-5p;hsa-miR-499a-5p;hsa-miR-193a-5p;hsa-miR-27a-3p;NC_000003.12_9115;hsa-miR-659-5p;hsa-miR-6842-3p;hsa-miR-9-5p;hsa-miR-449c-5p;hsa-miR-3929;hsa-miR-664a-5p;NC_000002.12_3880;NC_000017.11_32431;NC_000019.10_34428;hsa-miR-203a-3p;hsa-miR-22-5p;NC_000010.11_22861;NC_000011.10_23882;NC_000011.10_24785;NC_000009.12_21531
DPYSL2	1808	hsa_circ_0008221	0.0745192	6.77394e-34	20	hsa-miR-328-3p;hsa-miR-30d-5p;NC_000014.9_29046;hsa-miR-27a-3p;NC_000003.12_9115;hsa-miR-215-5p;hsa-miR-24-3p;hsa-miR-181c-5p;hsa-miR-9-5p;hsa-miR-369-3p;NC_000002.12_3880;hsa-miR-664a-5p;NC_000017.11_32431;hsa-miR-203a-3p;hsa-miR-181a-5p;hsa-miR-22-5p;NC_000010.11_22861;NC_000011.10_23882;NC_000011.10_24785;NC_000020.11_34751
FANCC	2176	hsa_circ_0008221	0.0697115	6.77394e-34	20	hsa-miR-328-3p;hsa-miR-30d-5p;hsa-miR-499a-5p;hsa-miR-193a-5p;hsa-miR-27a-3p;NC_000014.9_29046;NC_000003.12_9115;hsa-miR-24-3p;hsa-miR-659-5p;hsa-miR-6842-3p;hsa-miR-369-3p;hsa-miR-22-3p;hsa-miR-449c-5p;hsa-miR-9-5p;NC_000002.12_3880;NC_000017.11_32431;NC_000010.11_22861;NC_000011.10_24785;NC_000020.11_34751;hsa-miR-4443
FANCI	55215	hsa_circ_0008221	0.0721154	6.77394e-34	20	hsa-miR-30d-5p;hsa-miR-21-5p;hsa-miR-499a-5p;hsa-miR-27a-3p;NC_000003.12_9115;hsa-miR-659-5p;hsa-miR-6842-3p;hsa-miR-181c-5p;hsa-miR-22-3p;NC_000002.12_3880;hsa-miR-3929;hsa-miR-98-5p;NC_000017.11_32431;hsa-miR-181a-5p;hsa-miR-22-5p;NC_000010.11_22861;hsa-miR-6511b-5p;NC_000011.10_23882;NC_000020.11_34751;hsa-miR-4443
CENPF	1063	hsa_circ_0008221	0.103365	6.77394e-34	20	hsa-miR-328-3p;hsa-miR-499a-5p;hsa-miR-21-5p;hsa-miR-155-5p;hsa-miR-27a-3p;hsa-miR-193a-5p;NC_000014.9_29046;hsa-miR-24-3p;hsa-miR-659-5p;hsa-miR-6842-3p;hsa-miR-181c-5p;hsa-miR-9-5p;hsa-miR-664a-5p;NC_000017.11_32431;hsa-miR-203a-3p;hsa-miR-181a-5p;hsa-miR-6511b-5p;hsa-miR-22-5p;NC_000011.10_24785;hsa-miR-4443
LYST	1130	hsa_circ_0076332	0.756757	8.19265e-34	25	NC_000003.12_7520;hsa-miR-573;hsa-miR-3143;NC_000003.12_8583;NC_000003.12_7973;hsa-miR-15b-3p;NC_000007.14_17821;hsa-miR-34c-5p;hsa-miR-522-3p;NC_000010.11_23303;hsa-miR-373-5p;NC_000012.12_26286;NC_000006.12_15769;hsa-miR-3662;hsa-miR-520c-3p;NC_000008.11_20037*;hsa-miR-27b-5p;hsa-miR-372-5p;NC_000013.11_27627;hsa-miR-17-5p;NC_000008.11_19445;hsa-miR-20a-5p;hsa-miR-512-3p;hsa-miR-1323;NC_000008.…
PLEKHA6	22874	hsa_circ_0052203	0.722222	8.2634e-34	20	NC_000014.9_29046;NC_000024.10_38844;hsa-miR-6842-3p;hsa-miR-181c-5p;hsa-miR-22-3p;NC_000002.12_3880;hsa-miR-3929;hsa-miR-4435;hsa-miR-98-5p;NC_000017.11_32431;NC_000017.11_32431*;hsa-miR-6511b-5p;hsa-miR-642a-5p;hsa-miR-22-5p;NC_000011.10_24785;NC_000010.11_22289;NC_000010.11_22861;NC_000020.11_34751;hsa-miR-4443;NC_000009.12_21531
SORBS2	8470	hsa_circ_0059354	0.533333	1.53953e-33	18	hsa-miR-193a-5p;hsa-miR-27a-3p;NC_000024.10_38844;hsa-miR-24-3p;hsa-miR-6842-3p;hsa-miR-22-3p;NC_000016.10_31213;hsa-miR-3929;hsa-miR-98-5p;hsa-miR-148a-3p;NC_000017.11_32431;hsa-miR-181a-5p;hsa-miR-22-5p;NC_000010.11_22861;hsa-miR-6511b-5p;hsa-miR-215-3p;NC_000011.10_24785;hsa-miR-4443
POP1	10940	hsa_circ_0059354	0.577778	1.53953e-33	18	hsa-miR-30d-5p;NC_000014.9_29046;hsa-miR-27a-3p;NC_000024.10_38844;hsa-miR-24-3p;hsa-miR-6842-3p;hsa-miR-181c-5p;hsa-miR-22-3p;hsa-miR-9-5p;hsa-miR-3929;NC_000002.12_3880;hsa-miR-98-5p;hsa-miR-4758-3p;NC_000017.11_32431;hsa-miR-181a-5p;hsa-miR-6511b-5p;hsa-miR-22-5p;hsa-miR-215-3p
NCAPD3	23310	hsa_circ_0086848	0.530612	1.69688e-33	18	hsa-miR-328-3p;hsa-miR-193a-5p;hsa-miR-24-3p;hsa-miR-6842-3p;NC_000005.10_13790;hsa-miR-9-5p;hsa-miR-22-3p;hsa-miR-449c-5p;hsa-miR-3929;hsa-miR-4435;hsa-miR-98-5p;NC_000017.11_32431;NC_000019.10_34428;hsa-miR-148a-3p;hsa-miR-22-5p;hsa-miR-6511b-5p;NC_000010.11_22861;NC_000011.10_23882
FGA	2243	hsa_circ_0008221	0.0552885	2.16891e-33	20	hsa-miR-328-3p;hsa-miR-499a-5p;hsa-miR-21-5p;hsa-miR-193a-5p;hsa-miR-27a-3p;NC_000014.9_29046;hsa-miR-659-5p;hsa-miR-181c-5p;hsa-miR-22-3p;hsa-miR-449c-5p;hsa-miR-9-5p;hsa-miR-369-3p;NC_000002.12_3880;hsa-miR-98-5p;NC_000019.10_34428;hsa-miR-181a-5p;hsa-miR-6511b-5p;hsa-miR-22-5p;NC_000011.10_24785;NC_000020.11_34751
SP110	3431	hsa_circ_0008221	0.0817308	2.16891e-33	20	hsa-miR-328-3p;hsa-miR-193a-5p;NC_000014.9_29046;hsa-miR-155-5p;NC_000016.10_31515;hsa-miR-6842-3p;hsa-miR-181c-5p;hsa-miR-9-5p;hsa-miR-369-3p;hsa-miR-3929;hsa-miR-664a-5p;hsa-miR-98-5p;NC_000017.11_32431;hsa-miR-203a-3p;hsa-miR-181a-5p;hsa-miR-22-5p;NC_000010.11_22861;hsa-miR-6511b-5p;NC_000011.10_24785;NC_000020.11_34751
PIWIL2	55124	hsa_circ_0008221	0.0697115	2.16891e-33	20	hsa-miR-328-3p;hsa-miR-30d-5p;hsa-miR-193a-5p;hsa-miR-155-5p;hsa-miR-27a-3p;NC_000003.12_9115;hsa-miR-24-3p;hsa-miR-659-5p;hsa-miR-6842-3p;hsa-miR-181c-5p;hsa-miR-22-3p;hsa-miR-9-5p;hsa-miR-3929;hsa-miR-181a-5p;hsa-miR-22-5p;NC_000010.11_22861;hsa-miR-6511b-5p;NC_000011.10_23882;NC_000011.10_24785;NC_000009.12_21531
OAS3	4940	hsa_circ_0052203	0.75	2.6852e-33	19	NC_000024.10_38844;hsa-miR-6842-3p;hsa-miR-6807-5p;hsa-miR-181c-5p;hsa-miR-22-3p;hsa-miR-449c-5p;hsa-miR-3929;hsa-miR-4435;NC_000002.12_3880;hsa-miR-148a-3p;NC_000017.11_32431;NC_000017.11_32431*;hsa-miR-6511b-5p;hsa-miR-642a-5p;hsa-miR-22-5p;NC_000011.10_24785;NC_000020.11_34751;hsa-miR-4443;NC_000009.12_21531
MKI67	4288	hsa_circ_0059354	0.577778	2.71444e-33	19	hsa-miR-193a-5p;hsa-miR-27a-3p;NC_000024.10_38844;hsa-miR-24-3p;hsa-miR-6842-3p;hsa-miR-181c-5p;hsa-miR-22-3p;hsa-miR-449c-5p;hsa-miR-9-5p;NC_000002.12_3880;hsa-miR-98-5p;NC_000017.11_32431;hsa-miR-181a-5p;hsa-miR-22-5p;NC_000010.11_22861;hsa-miR-6511b-5p;hsa-miR-215-3p;NC_000011.10_24785;hsa-miR-4443
NOM1	64434	hsa_circ_0059713	0.634146	2.81893e-33	22	hsa-miR-548i;hsa-miR-582-5p;hsa-miR-34c-5p;NC_000006.12_16700;hsa-miR-302a-5p;NC_000003.12_9133;hsa-miR-373-5p;NC_000018.10_33504*;NC_000009.12_21925;hsa-miR-526b-5p;NC_000002.12_3238;hsa-miR-3662;hsa-miR-92a-3p;NC_000009.12_21957;NC_000010.11_23646;NC_000016.10_31157;hsa-miR-7-5p;NC_000022.11_36437;hsa-miR-372-5p;hsa-miR-20a-5p;NC_000011.10_25384;hsa-miR-371a-5p
TSC22D1	8848	hsa_circ_0059713	0.658537	2.9274e-33	24	hsa-miR-573;hsa-miR-548i;hsa-miR-582-5p;hsa-miR-3529-3p;NC_000006.12_16700;NC_000021.9_35751;hsa-miR-7974;hsa-miR-373-5p;NC_000018.10_33504*;NC_000009.12_21925;hsa-miR-526b-5p;NC_000006.12_15769;hsa-miR-3662;NC_000005.10_11919>NC_000005.10_11920;NC_000009.12_21957;NC_000001.11_2997;NC_000010.11_23646;NC_000016.10_31157;NC_000022.11_36437;hsa-miR-7-5p;hsa-miR-205-5p;NC_000011.10_25384;hsa-miR-1323…
MAFG	4097	hsa_circ_0059713	0.585366	4.11346e-33	23	hsa-miR-573;hsa-miR-548i;hsa-miR-582-5p;hsa-miR-34c-5p;NC_000006.12_16700;hsa-miR-302a-5p;NC_000003.12_9133;hsa-miR-373-5p;NC_000009.12_21925;hsa-miR-526b-5p;NC_000002.12_3238;NC_000006.12_15769;hsa-miR-3662;NC_000009.12_21957;NC_000001.11_2997;NC_000010.11_23646;NC_000016.10_31157;NC_000022.11_36437;hsa-miR-7-5p;hsa-miR-205-5p;hsa-miR-372-5p;hsa-miR-20a-5p;hsa-miR-1323
ATP2B4	493	hsa_circ_0059713	0.682927	4.41529e-33	25	hsa-miR-582-5p;hsa-miR-34c-5p;hsa-miR-302a-5p;NC_000023.11_36905;NC_000021.9_35751;hsa-miR-7974;NC_000003.12_9133;hsa-miR-373-5p;NC_000018.10_33504*;NC_000009.12_21925;hsa-miR-526b-5p;NC_000002.12_3238;NC_000006.12_15769;NC_000018.10_33037;hsa-miR-3662;NC_000005.10_11919>NC_000005.10_11920;NC_000010.11_23646;NC_000022.11_36437;hsa-miR-7-5p;hsa-miR-205-5p;hsa-miR-372-5p;hsa-miR-20a-5p;NC_000011.10…
MEF2A	4205	hsa_circ_0059713	0.634146	4.41529e-33	25	hsa-miR-582-5p;hsa-miR-3529-3p;NC_000006.12_16700;NC_000023.11_36905;hsa-miR-302a-5p;NC_000021.9_35751;NC_000003.12_9133;hsa-miR-373-5p;NC_000018.10_33504*;hsa-miR-526b-5p;NC_000002.12_3238;NC_000006.12_15769;NC_000018.10_33037;hsa-miR-3662;NC_000010.11_23646;NC_000016.10_31157;hsa-miR-7-5p;NC_000022.11_36437;hsa-miR-372-5p;hsa-miR-20a-5p;NC_000011.10_25384;NC_000003.12_7276;hsa-miR-371a-5p;hsa-m…
PPARA	5465	hsa_circ_0059713	0.731707	4.41529e-33	25	hsa-miR-573;hsa-miR-34c-5p;NC_000006.12_16700;NC_000023.11_36905;NC_000021.9_35751;hsa-miR-7974;NC_000003.12_9133;NC_000018.10_33504*;NC_000009.12_21925;hsa-miR-526b-5p;NC_000002.12_3238;NC_000006.12_15769;NC_000018.10_33037;hsa-miR-3662;NC_000005.10_11919>NC_000005.10_11920;NC_000010.11_23646;NC_000016.10_31157;hsa-miR-7-5p;NC_000022.11_36437;hsa-miR-20a-5p;NC_000011.10_25384;NC_000003.12_7276;h…
PSD3	23362	hsa_circ_0052203	0.722222	5.2264e-33	19	NC_000014.9_29046;NC_000024.10_38844;hsa-miR-6842-3p;hsa-miR-181c-5p;hsa-miR-22-3p;NC_000002.12_3880;hsa-miR-3929;hsa-miR-4435;hsa-miR-98-5p;NC_000017.11_32431;NC_000017.11_32431*;hsa-miR-6511b-5p;hsa-miR-22-5p;NC_000011.10_24785;NC_000010.11_22289;NC_000010.11_22861;NC_000020.11_34751;hsa-miR-4443;NC_000009.12_21531
SLCO2A1	6578	hsa_circ_0008221	0.0841346	5.56723e-33	19	hsa-miR-328-3p;hsa-miR-193a-5p;NC_000014.9_29046;hsa-miR-24-3p;hsa-miR-659-5p;hsa-miR-181c-5p;hsa-miR-22-3p;hsa-miR-449c-5p;hsa-miR-3929;hsa-miR-664a-5p;hsa-miR-98-5p;NC_000017.11_32431;hsa-miR-181a-5p;hsa-miR-6511b-5p;hsa-miR-22-5p;NC_000011.10_24785;NC_000020.11_34751;hsa-miR-4443;NC_000009.12_21531
DTX3L	151636	hsa_circ_0008221	0.0697115	5.56723e-33	19	hsa-miR-499a-5p;hsa-miR-193a-5p;hsa-miR-6842-3p;hsa-miR-181c-5p;hsa-miR-9-5p;hsa-miR-22-3p;hsa-miR-3929;hsa-miR-664a-5p;hsa-miR-98-5p;NC_000017.11_32431;NC_000019.10_34428;hsa-miR-203a-3p;hsa-miR-181a-5p;hsa-miR-22-5p;NC_000010.11_22861;NC_000011.10_23882;NC_000020.11_34751;hsa-miR-4443;NC_000009.12_21531
SLC7A11	23657	hsa_circ_0053716	0.618182	6.12719e-33	24	hsa-miR-548i;hsa-miR-15b-3p;hsa-miR-5585-3p;hsa-miR-3529-3p;NC_000007.14_17821;hsa-miR-3155a;NC_000021.9_35751;NC_000003.12_9133;NC_000018.10_33504*;NC_000009.12_20733;NC_000002.12_3238;hsa-miR-3662;hsa-miR-520a-3p;hsa-miR-92a-3p;hsa-miR-302c-5p;NC_000001.11_3101;NC_000010.11_23646;hsa-miR-372-5p;NC_000007.14_17824;hsa-let-7c-5p;hsa-miR-512-3p;hsa-miR-302b-5p;hsa-miR-1323;NC_000008.11_20037
ZNF608	57507	hsa_circ_0008221	0.0793269	6.46558e-33	20	hsa-miR-328-3p;hsa-miR-30d-5p;hsa-miR-193a-5p;hsa-miR-155-5p;hsa-miR-27a-3p;NC_000003.12_9115;hsa-miR-6842-3p;hsa-miR-181c-5p;hsa-miR-9-5p;NC_000002.12_3880;hsa-miR-664a-5p;hsa-miR-203a-3p;hsa-miR-181a-5p;hsa-miR-22-5p;NC_000010.11_22861;NC_000011.10_23882;NC_000011.10_24785;NC_000020.11_34751;hsa-miR-4443;NC_000009.12_21531
OAS2	4939	hsa_circ_0008221	0.0649038	6.46558e-33	20	hsa-miR-499a-5p;hsa-miR-21-5p;hsa-miR-193a-5p;NC_000016.10_31515;hsa-miR-215-5p;hsa-miR-24-3p;hsa-miR-6842-3p;hsa-miR-9-5p;hsa-miR-449c-5p;NC_000016.10_31213;hsa-miR-664a-5p;NC_000017.11_32431;hsa-miR-203a-3p;hsa-miR-22-5p;hsa-miR-6511b-5p;NC_000010.11_22861;NC_000011.10_24785;NC_000020.11_34751;hsa-miR-4443;NC_000009.12_21531
RAD54L	8438	hsa_circ_0008221	0.0576923	6.46558e-33	20	NC_000014.9_29046;hsa-miR-27a-3p;hsa-miR-24-3p;hsa-miR-659-5p;hsa-miR-6842-3p;hsa-miR-181c-5p;hsa-miR-22-3p;hsa-miR-449c-5p;hsa-miR-3929;hsa-miR-664a-5p;hsa-miR-98-5p;NC_000017.11_32431;NC_000019.10_34428;hsa-miR-203a-3p;hsa-miR-22-5p;hsa-miR-6511b-5p;NC_000010.11_22861;NC_000011.10_24785;hsa-miR-4443;NC_000009.12_21531
ROBO1	6091	hsa_circ_0052203	0.611111	6.75494e-33	18	NC_000014.9_29046;hsa-miR-6842-3p;hsa-miR-181c-5p;hsa-miR-22-3p;NC_000002.12_3880;hsa-miR-3929;hsa-miR-4435;hsa-miR-98-5p;hsa-miR-148a-3p;NC_000017.11_32431;NC_000017.11_32431*;hsa-miR-6511b-5p;hsa-miR-642a-5p;hsa-miR-22-5p;NC_000011.10_24785;NC_000010.11_22289;hsa-miR-4443;NC_000009.12_21531
CISH	1154	hsa_circ_0052203	0.638889	6.75494e-33	18	NC_000014.9_29046;hsa-miR-6842-3p;hsa-miR-181c-5p;hsa-miR-22-3p;hsa-miR-449c-5p;hsa-miR-3929;hsa-miR-4435;hsa-miR-98-5p;hsa-miR-148a-3p;NC_000017.11_32431;NC_000017.11_32431*;hsa-miR-6511b-5p;hsa-miR-642a-5p;hsa-miR-22-5p;NC_000011.10_24785;NC_000010.11_22289;NC_000010.11_22861;hsa-miR-4443
C11orf54	28970	hsa_circ_0059713	0.609756	7.13291e-33	23	hsa-miR-573;hsa-miR-548i;hsa-miR-582-5p;hsa-miR-34c-5p;NC_000006.12_16700;NC_000023.11_36905;hsa-miR-7974;NC_000003.12_9133;hsa-miR-373-5p;NC_000018.10_33504*;hsa-miR-526b-5p;NC_000002.12_3238;NC_000006.12_15769;NC_000018.10_33037;hsa-miR-3662;NC_000005.10_11919>NC_000005.10_11920;hsa-miR-92a-3p;NC_000010.11_23646;hsa-miR-7-5p;hsa-miR-372-5p;hsa-miR-20a-5p;hsa-miR-371a-5p;hsa-miR-1323
FIGN	55137	hsa_circ_0012566	0.84	8.10641e-33	18	hsa-miR-30d-5p;hsa-miR-21-5p;hsa-miR-499a-5p;hsa-miR-193a-5p;NC_000003.12_9115;hsa-miR-24-3p;NC_000011.10_23882;hsa-miR-181c-5p;hsa-miR-22-3p;hsa-miR-9-5p;hsa-miR-664a-5p;hsa-miR-203a-3p;hsa-miR-181a-5p;hsa-miR-22-5p;NC_000016.10_31515;NC_000008.11_18787;hsa-miR-6511b-5p;NC_000009.12_21531
ESPL1	9700	hsa_circ_0086848	0.612245	8.50131e-33	18	hsa-miR-328-3p;hsa-miR-193a-5p;hsa-miR-4443;hsa-miR-24-3p;hsa-miR-659-5p;hsa-miR-6842-3p;NC_000005.10_13790;hsa-miR-22-3p;hsa-miR-449c-5p;hsa-miR-3929;hsa-miR-9-5p;hsa-miR-4435;hsa-miR-98-5p;NC_000017.11_32431;hsa-miR-22-5p;hsa-miR-6511b-5p;NC_000010.11_22861;hsa-miR-183-5p
MYT1L	23040	hsa_circ_0052203	0.722222	9.9365e-33	19	NC_000014.9_29046;NC_000024.10_38844;hsa-miR-6842-3p;hsa-miR-181c-5p;hsa-miR-22-3p;hsa-miR-449c-5p;hsa-miR-3929;hsa-miR-4435;NC_000002.12_3880;hsa-miR-98-5p;NC_000017.11_32431;NC_000017.11_32431*;hsa-miR-6511b-5p;hsa-miR-22-5p;NC_000011.10_24785;NC_000010.11_22861;NC_000020.11_34751;hsa-miR-4443;NC_000009.12_21531
RAD54L	8438	hsa_circ_0059354	0.444444	1.00944e-32	18	NC_000014.9_29046;hsa-miR-27a-3p;NC_000024.10_38844;hsa-miR-24-3p;hsa-miR-6842-3p;hsa-miR-181c-5p;hsa-miR-22-3p;hsa-miR-449c-5p;hsa-miR-3929;hsa-miR-98-5p;hsa-miR-148a-3p;NC_000017.11_32431;hsa-miR-22-5p;hsa-miR-6511b-5p;NC_000010.11_22861;hsa-miR-215-3p;NC_000011.10_24785;hsa-miR-4443
KCNJ2	3759	hsa_circ_0059354	0.466667	1.00944e-32	18	hsa-miR-193a-5p;NC_000024.10_38844;hsa-miR-24-3p;hsa-miR-181c-5p;hsa-miR-9-5p;hsa-miR-449c-5p;hsa-miR-22-3p;hsa-miR-3929;hsa-miR-98-5p;hsa-miR-4758-3p;NC_000017.11_32431;hsa-miR-148a-3p;hsa-miR-181a-5p;hsa-miR-6511b-5p;hsa-miR-22-5p;hsa-miR-215-3p;NC_000011.10_24785;hsa-miR-4443
SP100	6672	hsa_circ_0059354	0.444444	1.00944e-32	18	NC_000014.9_29046;hsa-miR-27a-3p;NC_000024.10_38844;hsa-miR-24-3p;hsa-miR-6842-3p;hsa-miR-181c-5p;hsa-miR-22-3p;hsa-miR-9-5p;hsa-miR-3929;NC_000002.12_3880;hsa-miR-98-5p;hsa-miR-4758-3p;NC_000017.11_32431;hsa-miR-181a-5p;hsa-miR-22-5p;NC_000010.11_22861;hsa-miR-215-3p;hsa-miR-4443
POLA1	5422	hsa_circ_0008221	0.0576923	1.01662e-32	17	hsa-miR-193a-5p;hsa-miR-30d-5p;hsa-miR-155-5p;hsa-miR-27a-3p;NC_000003.12_9115;hsa-miR-6842-3p;hsa-miR-181c-5p;hsa-miR-22-3p;hsa-miR-9-5p;hsa-miR-98-5p;hsa-miR-664a-5p;hsa-miR-203a-3p;hsa-miR-181a-5p;hsa-miR-22-5p;NC_000011.10_24785;hsa-miR-4443;NC_000009.12_21531
IQGAP3	128239	hsa_circ_0059354	0.533333	1.11096e-32	19	hsa-miR-193a-5p;NC_000014.9_29046;hsa-miR-27a-3p;NC_000024.10_38844;hsa-miR-24-3p;hsa-miR-6842-3p;hsa-miR-181c-5p;hsa-miR-22-3p;hsa-miR-449c-5p;hsa-miR-3929;hsa-miR-9-5p;NC_000002.12_3880;hsa-miR-98-5p;hsa-miR-181a-5p;hsa-miR-6511b-5p;hsa-miR-22-5p;hsa-miR-215-3p;NC_000011.10_24785;hsa-miR-4443
HIPK2	28996	hsa_circ_0076332	0.756757	1.14779e-32	25	NC_000003.12_7520;hsa-miR-573;hsa-miR-3143;NC_000003.12_8583;NC_000003.12_7973;hsa-miR-15b-3p;NC_000007.14_17821;hsa-miR-522-3p;hsa-miR-34c-5p;hsa-miR-18a-3p;hsa-miR-302a-5p;NC_000010.11_23303;hsa-miR-373-5p;NC_000012.12_26286;NC_000006.12_15769;hsa-miR-3662;hsa-miR-520c-3p;hsa-miR-372-5p;NC_000013.11_27627;hsa-miR-17-5p;NC_000008.11_19445;hsa-miR-20a-5p;hsa-miR-512-3p;hsa-miR-302b-5p;hsa-miR-1323
TBC1D19	55296	hsa_circ_0059713	0.609756	1.22041e-32	23	hsa-miR-573;hsa-miR-582-5p;hsa-miR-3529-3p;hsa-miR-34c-5p;hsa-miR-302a-5p;NC_000021.9_35751;NC_000003.12_9133;hsa-miR-373-5p;NC_000018.10_33504*;NC_000009.12_21925;hsa-miR-526b-5p;NC_000006.12_15769;NC_000018.10_33037;hsa-miR-3662;NC_000005.10_11919>NC_000005.10_11920;hsa-miR-92a-3p;NC_000016.10_31157;NC_000022.11_36437;hsa-miR-7-5p;hsa-miR-205-5p;hsa-miR-372-5p;NC_000011.10_25384;hsa-miR-1323
PIK3CA	5290	hsa_circ_0053716	0.563636	1.34275e-32	24	hsa-miR-548i;hsa-miR-15b-3p;hsa-miR-5585-3p;NC_000007.14_17821;hsa-miR-3155a;NC_000004.12_9958;NC_000023.11_38289;hsa-miR-7974;NC_000003.12_9133;NC_000018.10_33504*;NC_000009.12_20733;NC_000002.12_3238;hsa-miR-3662;hsa-miR-520a-3p;hsa-miR-92a-3p;hsa-miR-302c-5p;NC_000010.11_23646;hsa-miR-92a-1-5p;hsa-miR-372-5p;NC_000007.14_17824;hsa-let-7c-5p;hsa-miR-512-3p;hsa-miR-302b-5p;hsa-miR-1323
GRB10	2887	hsa_circ_0053716	0.6	1.34275e-32	24	hsa-miR-548i;hsa-miR-5585-3p;hsa-miR-3529-3p;hsa-miR-3155a;hsa-miR-7974;NC_000023.11_38289;NC_000010.11_23303;NC_000018.10_33504*;NC_000002.12_3238;hsa-miR-3662;hsa-miR-520a-3p;hsa-miR-92a-3p;hsa-miR-302c-5p;NC_000001.11_3101;NC_000010.11_23646;hsa-miR-92a-1-5p;hsa-miR-372-5p;NC_000007.14_17824;hsa-let-7c-5p;hsa-miR-512-3p;hsa-miR-510-5p;hsa-miR-302b-5p;hsa-miR-1323;NC_000008.11_20037
CISH	1154	hsa_circ_0008221	0.125	1.81059e-32	20	hsa-miR-328-3p;NC_000014.9_29046;hsa-miR-27a-3p;hsa-miR-24-3p;hsa-miR-6842-3p;hsa-miR-181c-5p;hsa-miR-22-3p;hsa-miR-449c-5p;hsa-miR-3929;hsa-miR-9-5p;hsa-miR-664a-5p;hsa-miR-98-5p;NC_000017.11_32431;NC_000019.10_34428;hsa-miR-181a-5p;hsa-miR-22-5p;NC_000010.11_22861;hsa-miR-6511b-5p;NC_000011.10_24785;hsa-miR-4443
E2F2	1870	hsa_circ_0008221	0.0841346	1.81059e-32	20	hsa-miR-328-3p;hsa-miR-193a-5p;NC_000014.9_29046;hsa-miR-155-5p;hsa-miR-27a-3p;hsa-miR-24-3p;hsa-miR-659-5p;hsa-miR-6842-3p;hsa-miR-22-3p;hsa-miR-9-5p;hsa-miR-3929;NC_000002.12_3880;hsa-miR-98-5p;NC_000019.10_34428;hsa-miR-6511b-5p;hsa-miR-22-5p;NC_000011.10_24785;NC_000020.11_34751;hsa-miR-4443;NC_000009.12_21531
ICMT	23463	hsa_circ_0008221	0.0817308	1.81059e-32	20	hsa-miR-30d-5p;hsa-miR-193a-5p;NC_000003.12_9115;hsa-miR-215-5p;hsa-miR-6842-3p;hsa-miR-181c-5p;hsa-miR-9-5p;hsa-miR-22-3p;hsa-miR-3929;hsa-miR-664a-5p;hsa-miR-98-5p;NC_000017.11_32431;NC_000019.10_34428;hsa-miR-203a-3p;hsa-miR-181a-5p;hsa-miR-22-5p;NC_000010.11_22861;hsa-miR-6511b-5p;NC_000011.10_24785;hsa-miR-4443
TRIM14	9830	hsa_circ_0008221	0.0841346	1.81059e-32	20	hsa-miR-328-3p;NC_000003.12_9115;NC_000016.10_31515;hsa-miR-6842-3p;hsa-miR-181c-5p;hsa-miR-22-3p;hsa-miR-449c-5p;hsa-miR-3929;hsa-miR-9-5p;hsa-miR-664a-5p;NC_000002.12_3880;hsa-miR-98-5p;NC_000019.10_34428;hsa-miR-203a-3p;hsa-miR-181a-5p;hsa-miR-6511b-5p;NC_000010.11_22861;NC_000011.10_24785;hsa-miR-4443;NC_000009.12_21531
MID1	4281	hsa_circ_0008221	0.0817308	1.81059e-32	20	hsa-miR-328-3p;hsa-miR-193a-5p;NC_000014.9_29046;hsa-miR-27a-3p;hsa-miR-24-3p;hsa-miR-659-5p;hsa-miR-6842-3p;hsa-miR-9-5p;hsa-miR-22-3p;hsa-miR-3929;hsa-miR-664a-5p;NC_000002.12_3880;hsa-miR-98-5p;NC_000017.11_32431;hsa-miR-203a-3p;hsa-miR-6511b-5p;hsa-miR-22-5p;NC_000011.10_24785;NC_000020.11_34751;NC_000009.12_21531
ROBO1	6091	hsa_circ_0008221	0.0961538	1.81059e-32	20	hsa-miR-193a-5p;NC_000014.9_29046;hsa-miR-27a-3p;NC_000016.10_31515;hsa-miR-24-3p;hsa-miR-659-5p;hsa-miR-6842-3p;hsa-miR-181c-5p;hsa-miR-22-3p;NC_000002.12_3880;hsa-miR-3929;hsa-miR-664a-5p;hsa-miR-98-5p;NC_000017.11_32431;hsa-miR-203a-3p;hsa-miR-6511b-5p;hsa-miR-22-5p;NC_000011.10_24785;hsa-miR-4443;NC_000009.12_21531
SLC45A4	57210	hsa_circ_0059713	0.707317	1.85365e-32	24	hsa-miR-573;hsa-miR-548i;hsa-miR-582-5p;hsa-miR-3529-3p;NC_000006.12_16700;NC_000023.11_36905;hsa-miR-7974;NC_000018.10_33504*;NC_000009.12_21925;hsa-miR-526b-5p;NC_000002.12_3238;NC_000006.12_15769;hsa-miR-3662;NC_000005.10_11919>NC_000005.10_11920;hsa-miR-92a-3p;NC_000009.12_21957;NC_000001.11_2997;NC_000022.11_36437;hsa-miR-7-5p;hsa-miR-205-5p;hsa-miR-20a-5p;NC_000011.10_25384;hsa-miR-371a-5p;…
H2AFV	94239	hsa_circ_0008221	0.0697115	2.05404e-32	19	hsa-miR-193a-5p;NC_000014.9_29046;hsa-miR-6842-3p;hsa-miR-181c-5p;hsa-miR-9-5p;hsa-miR-449c-5p;hsa-miR-22-3p;hsa-miR-3929;hsa-miR-369-3p;hsa-miR-664a-5p;hsa-miR-98-5p;hsa-miR-203a-3p;hsa-miR-181a-5p;hsa-miR-6511b-5p;NC_000016.10_31515;NC_000011.10_23882;NC_000011.10_24785;NC_000020.11_34751;NC_000009.12_21531
ZMYM6	9204	hsa_circ_0059713	0.634146	2.0616e-32	23	hsa-miR-582-5p;hsa-miR-3529-3p;NC_000006.12_16700;hsa-miR-302a-5p;NC_000021.9_35751;hsa-miR-7974;NC_000003.12_9133;hsa-miR-373-5p;NC_000018.10_33504*;NC_000009.12_21925;hsa-miR-526b-5p;NC_000002.12_3238;NC_000018.10_33037;hsa-miR-3662;NC_000009.12_21957;NC_000010.11_23646;NC_000016.10_31157;hsa-miR-7-5p;NC_000022.11_36437;hsa-miR-372-5p;NC_000011.10_25384;hsa-miR-1323;NC_000008.11_20037
CDCA2	157313	hsa_circ_0059354	0.466667	2.40089e-32	18	hsa-miR-193a-5p;NC_000014.9_29046;hsa-miR-27a-3p;NC_000024.10_38844;hsa-miR-24-3p;hsa-miR-6842-3p;hsa-miR-181c-5p;hsa-miR-9-5p;hsa-miR-22-3p;hsa-miR-3929;NC_000002.12_3880;hsa-miR-98-5p;NC_000017.11_32431;hsa-miR-181a-5p;hsa-miR-6511b-5p;hsa-miR-22-5p;hsa-miR-215-3p;NC_000011.10_24785
RTKN2	219790	hsa_circ_0059354	0.555556	2.40089e-32	18	hsa-miR-30d-5p;hsa-miR-193a-5p;NC_000014.9_29046;hsa-miR-27a-3p;NC_000024.10_38844;hsa-miR-6842-3p;hsa-miR-181c-5p;hsa-miR-9-5p;NC_000002.12_3880;hsa-miR-3929;hsa-miR-98-5p;NC_000017.11_32431;hsa-miR-181a-5p;hsa-miR-22-5p;NC_000010.11_22861;hsa-miR-6511b-5p;hsa-miR-215-3p;NC_000011.10_24785
TTN	7273	hsa_circ_0076332	0.756757	3.11582e-32	24	NC_000003.12_7520;hsa-miR-573;hsa-miR-3143;NC_000003.12_7973;hsa-miR-15b-3p;NC_000007.14_17821;hsa-miR-522-3p;hsa-miR-34c-5p;hsa-miR-18a-3p;NC_000010.11_23303;hsa-miR-373-5p;NC_000012.12_26286;NC_000006.12_15769;hsa-miR-3662;hsa-miR-520c-3p;NC_000008.11_20037*;hsa-miR-27b-5p;hsa-miR-372-5p;hsa-miR-17-5p;NC_000018.10_33742;hsa-miR-20a-5p;hsa-miR-302b-5p;hsa-miR-1323;NC_000008.11_20037
SPAG5	10615	hsa_circ_0008221	0.0576923	3.14787e-32	18	hsa-miR-499a-5p;hsa-miR-193a-5p;hsa-miR-27a-3p;NC_000016.10_31515;hsa-miR-24-3p;hsa-miR-6842-3p;hsa-miR-181c-5p;hsa-miR-9-5p;hsa-miR-449c-5p;hsa-miR-3929;hsa-miR-369-3p;hsa-miR-98-5p;hsa-miR-203a-3p;hsa-miR-181a-5p;hsa-miR-22-5p;NC_000020.11_34751;hsa-miR-4443;NC_000009.12_21531
ATAD5	79915	hsa_circ_0008221	0.100962	3.14787e-32	18	hsa-miR-499a-5p;hsa-miR-21-5p;NC_000003.12_9115;hsa-miR-215-5p;hsa-miR-24-3p;hsa-miR-369-3p;hsa-miR-9-5p;hsa-miR-22-3p;hsa-miR-3929;hsa-miR-664a-5p;NC_000002.12_3880;hsa-miR-98-5p;NC_000017.11_32431;hsa-miR-181a-5p;NC_000004.12_10963;hsa-miR-22-5p;hsa-miR-4443;NC_000009.12_21531
FANCA	2175	hsa_circ_0052203	0.666667	3.36896e-32	19	NC_000014.9_29046;hsa-miR-26b-5p;hsa-miR-6842-3p;hsa-miR-181c-5p;hsa-miR-22-3p;hsa-miR-449c-5p;hsa-miR-3929;hsa-miR-4435;hsa-miR-148a-3p;NC_000017.11_32431;NC_000017.11_32431*;hsa-miR-6511b-5p;hsa-miR-642a-5p;hsa-miR-22-5p;NC_000011.10_24785;NC_000010.11_22289;NC_000020.11_34751;hsa-miR-4443;NC_000009.12_21531
PODXL	5420	hsa_circ_0052203	0.527778	3.38169e-32	18	NC_000014.9_29046;hsa-miR-6842-3p;hsa-miR-181c-5p;hsa-miR-22-3p;hsa-miR-449c-5p;hsa-miR-3929;hsa-miR-4435;NC_000002.12_3880;hsa-miR-148a-3p;NC_000017.11_32431*;hsa-miR-6511b-5p;hsa-miR-642a-5p;hsa-miR-22-5p;NC_000011.10_24785;NC_000010.11_22289;NC_000010.11_22861;hsa-miR-4443;NC_000009.12_21531
BAHCC1	57597	hsa_circ_0059713	0.682927	3.44053e-32	23	hsa-miR-3529-3p;hsa-miR-34c-5p;NC_000006.12_16700;NC_000023.11_36905;NC_000021.9_35751;hsa-miR-7974;NC_000003.12_9133;hsa-miR-373-5p;NC_000009.12_21925;hsa-miR-526b-5p;NC_000002.12_3238;NC_000006.12_15769;NC_000018.10_33037;NC_000005.10_11919>NC_000005.10_11920;hsa-miR-92a-3p;NC_000010.11_23646;hsa-miR-7-5p;hsa-miR-205-5p;hsa-miR-372-5p;hsa-miR-20a-5p;NC_000011.10_25384;hsa-miR-371a-5p;hsa-miR-13…
NAV2	89797	hsa_circ_0086848	0.653061	3.84621e-32	19	hsa-miR-328-3p;hsa-miR-193a-5p;hsa-miR-4443;hsa-miR-24-3p;hsa-miR-6842-3p;NC_000005.10_13790;hsa-miR-22-3p;hsa-miR-449c-5p;hsa-miR-3929;hsa-miR-9-5p;hsa-miR-4435;hsa-miR-98-5p;NC_000017.11_32431;NC_000019.10_34428;hsa-miR-148a-3p;hsa-miR-22-5p;hsa-miR-6511b-5p;NC_000010.11_22861;hsa-miR-183-5p
PPARGC1A	10891	hsa_circ_0006957	0.115646	3.91502e-32	18	hsa-miR-30d-5p;hsa-miR-193a-5p;NC_000003.12_9115;NC_000016.10_31515;hsa-miR-215-5p;hsa-miR-24-3p;hsa-miR-659-5p;hsa-miR-22-3p;hsa-miR-9-5p;hsa-miR-3929;NC_000016.10_31213;hsa-miR-5701;NC_000019.10_34428;hsa-miR-22-5p;NC_000010.11_22861;NC_000011.10_23882;NC_000011.10_24785;NC_000020.11_34751
XIAP	331	hsa_circ_0059713	0.609756	4.42637e-32	24	hsa-miR-573;hsa-miR-582-5p;hsa-miR-3529-3p;hsa-miR-34c-5p;hsa-miR-302a-5p;NC_000021.9_35751;hsa-miR-7974;NC_000003.12_9133;hsa-miR-373-5p;NC_000018.10_33504*;hsa-miR-526b-5p;NC_000002.12_3238;NC_000006.12_15769;NC_000018.10_33037;hsa-miR-3662;NC_000010.11_23646;NC_000016.10_31157;hsa-miR-7-5p;hsa-miR-372-5p;hsa-miR-20a-5p;NC_000011.10_25384;NC_000003.12_7276;hsa-miR-371a-5p;hsa-miR-1323
IGFBP5	3488	hsa_circ_0008221	0.0961538	4.79768e-32	20	hsa-miR-328-3p;hsa-miR-499a-5p;NC_000014.9_29046;hsa-miR-155-5p;hsa-miR-24-3p;hsa-miR-659-5p;hsa-miR-6842-3p;hsa-miR-22-3p;hsa-miR-449c-5p;hsa-miR-3929;hsa-miR-664a-5p;hsa-miR-98-5p;hsa-miR-203a-3p;hsa-miR-22-5p;hsa-miR-6511b-5p;NC_000010.11_22861;NC_000011.10_23882;NC_000011.10_24785;hsa-miR-4443;NC_000009.12_21531
TGM2	7052	hsa_circ_0008221	0.0985577	4.79768e-32	20	hsa-miR-328-3p;hsa-miR-27a-3p;hsa-miR-24-3p;hsa-miR-659-5p;hsa-miR-6842-3p;hsa-miR-181c-5p;hsa-miR-9-5p;hsa-miR-449c-5p;hsa-miR-3929;hsa-miR-664a-5p;hsa-miR-98-5p;NC_000017.11_32431;hsa-miR-203a-3p;hsa-miR-181a-5p;hsa-miR-22-5p;NC_000010.11_22861;hsa-miR-6511b-5p;NC_000020.11_34751;hsa-miR-4443;NC_000009.12_21531
SLC39A10	57181	hsa_circ_0076332	0.72973	5.00118e-32	23	NC_000003.12_7520;hsa-miR-3143;NC_000003.12_7973;hsa-miR-15b-3p;NC_000007.14_17821;hsa-miR-34c-5p;hsa-miR-522-3p;NC_000010.11_23303;hsa-miR-373-5p;NC_000012.12_26286;NC_000006.12_15769;hsa-miR-3662;hsa-miR-520c-3p;NC_000008.11_20037*;hsa-miR-27b-5p;hsa-miR-372-5p;NC_000013.11_27627;hsa-miR-17-5p;NC_000008.11_19445;hsa-miR-20a-5p;hsa-miR-302b-5p;hsa-miR-1323;NC_000008.11_20037
MCM4	4173	hsa_circ_0059354	0.511111	5.47353e-32	18	hsa-miR-193a-5p;NC_000014.9_29046;hsa-miR-27a-3p;NC_000024.10_38844;hsa-miR-6842-3p;hsa-miR-181c-5p;hsa-miR-22-3p;hsa-miR-449c-5p;hsa-miR-3929;hsa-miR-9-5p;NC_000002.12_3880;hsa-miR-98-5p;NC_000017.11_32431;hsa-miR-181a-5p;hsa-miR-6511b-5p;NC_000010.11_22861;hsa-miR-215-3p;hsa-miR-4443
CFTR	1080	hsa_circ_0008221	0.0889423	6.88611e-32	19	hsa-miR-193a-5p;hsa-miR-21-5p;hsa-miR-155-5p;hsa-miR-27a-3p;hsa-miR-6842-3p;hsa-miR-369-3p;hsa-miR-9-5p;hsa-miR-22-3p;hsa-miR-3929;hsa-miR-664a-5p;NC_000002.12_3880;hsa-miR-98-5p;NC_000017.11_32431;NC_000019.10_34428;hsa-miR-203a-3p;hsa-miR-22-5p;NC_000004.12_10963;NC_000010.11_22861;NC_000009.12_21531
TOP2A	7153	hsa_circ_0008221	0.0697115	6.88611e-32	19	hsa-miR-30d-5p;hsa-miR-193a-5p;hsa-miR-155-5p;hsa-miR-27a-3p;NC_000003.12_9115;hsa-miR-659-5p;hsa-miR-6842-3p;hsa-miR-369-3p;hsa-miR-9-5p;NC_000002.12_3880;hsa-miR-3929;NC_000019.10_34428;hsa-miR-203a-3p;hsa-miR-6511b-5p;NC_000004.12_10963;hsa-miR-22-5p;NC_000011.10_23882;NC_000011.10_24785;NC_000009.12_21531
KIF18A	81930	hsa_circ_0008221	0.0576923	6.96855e-32	16	hsa-miR-328-3p;hsa-miR-193a-5p;hsa-miR-499a-5p;hsa-miR-24-3p;hsa-miR-659-5p;hsa-miR-369-3p;NC_000002.12_3880;hsa-miR-22-3p;hsa-miR-3929;hsa-miR-9-5p;NC_000017.11_32431;hsa-miR-203a-3p;hsa-miR-181a-5p;hsa-miR-6511b-5p;hsa-miR-22-5p;NC_000009.12_21531
ANK1	286	hsa_circ_0086848	0.530612	7.39735e-32	18	hsa-miR-328-3p;hsa-miR-193a-5p;hsa-miR-4443;hsa-miR-24-3p;hsa-miR-659-5p;hsa-miR-6842-3p;NC_000005.10_13790;hsa-miR-9-5p;hsa-miR-22-3p;hsa-miR-3929;hsa-miR-449c-5p;hsa-miR-4435;hsa-miR-98-5p;NC_000017.11_32431;NC_000019.10_34428;hsa-miR-6511b-5p;hsa-miR-22-5p;hsa-miR-183-5p
RFC3	5983	hsa_circ_0086848	0.693878	7.39735e-32	18	hsa-miR-328-3p;hsa-miR-193a-5p;hsa-miR-4443;hsa-miR-24-3p;hsa-miR-659-5p;hsa-miR-6842-3p;hsa-miR-369-3p;hsa-miR-9-5p;hsa-miR-449c-5p;hsa-miR-3929;hsa-miR-4435;hsa-miR-98-5p;NC_000017.11_32431;hsa-miR-203a-3p;hsa-miR-22-5p;hsa-miR-6511b-5p;NC_000010.11_22861;hsa-miR-183-5p
TNFSF15	9966	hsa_circ_0076332	0.675676	7.47896e-32	23	NC_000003.12_7520;hsa-miR-573;NC_000003.12_8583;NC_000003.12_7973;hsa-miR-15b-3p;hsa-miR-5585-3p;hsa-miR-34c-5p;hsa-miR-522-3p;hsa-miR-18a-3p;NC_000010.11_23303;hsa-miR-373-5p;NC_000012.12_26286;NC_000006.12_15769;hsa-miR-3662;hsa-miR-520c-3p;hsa-miR-372-5p;hsa-miR-17-5p;NC_000008.11_19445;hsa-miR-20a-5p;hsa-miR-512-3p;hsa-miR-302b-5p;hsa-miR-1323;NC_000008.11_20037
ZGRF1	55345	hsa_circ_0008221	0.0865385	9.58695e-32	17	hsa-miR-499a-5p;hsa-miR-21-5p;hsa-miR-155-5p;hsa-miR-27a-3p;hsa-miR-215-5p;hsa-miR-24-3p;hsa-miR-659-5p;hsa-miR-6842-3p;hsa-miR-181c-5p;hsa-miR-369-3p;hsa-miR-9-5p;hsa-miR-3929;hsa-miR-98-5p;hsa-miR-181a-5p;hsa-miR-22-5p;NC_000011.10_24785;NC_000009.12_21531
ESCO2	157570	hsa_circ_0012566	0.68	9.74851e-32	16	hsa-miR-30d-5p;hsa-miR-499a-5p;NC_000003.12_9115;NW_003315954.1_39634;hsa-miR-24-3p;hsa-miR-181c-5p;hsa-miR-22-3p;hsa-miR-449c-5p;hsa-miR-9-5p;hsa-miR-203a-3p;hsa-miR-181a-5p;hsa-miR-22-5p;NC_000010.11_22861;NC_000008.11_18787;hsa-miR-6511b-5p;NC_000009.12_21531
FRMD4B	23150	hsa_circ_0006957	0.105442	9.75495e-32	18	hsa-miR-30d-5p;hsa-miR-21-5p;hsa-miR-155-5p;hsa-miR-27a-3p;NC_000016.10_31515;NC_000003.12_9115;hsa-miR-215-5p;hsa-miR-24-3p;hsa-miR-22-3p;hsa-miR-9-5p;NC_000016.10_31213;hsa-miR-3929;NC_000012.12_26540;NC_000019.10_34428;hsa-miR-22-5p;NC_000010.11_22861;NC_000011.10_23882;NC_000020.11_34751
NCOA7	135112	hsa_circ_0076332	0.675676	1.1105e-31	23	hsa-miR-573;hsa-miR-3143;hsa-miR-15b-3p;hsa-miR-18a-3p;hsa-miR-522-3p;hsa-miR-302a-5p;NC_000010.11_23303;NC_000012.12_26286;NC_000006.12_15769;hsa-miR-3662;hsa-miR-520c-3p;NC_000008.11_20037*;hsa-miR-27b-5p;hsa-miR-372-5p;NC_000013.11_27627;hsa-miR-17-5p;NC_000008.11_19445;NC_000018.10_33742;hsa-miR-20a-5p;hsa-miR-512-3p;hsa-miR-302b-5p;hsa-miR-1323;NC_000008.11_20037
ESPL1	9700	hsa_circ_0059354	0.511111	1.20105e-31	18	hsa-miR-193a-5p;hsa-miR-27a-3p;NC_000024.10_38844;hsa-miR-24-3p;hsa-miR-6842-3p;hsa-miR-22-3p;hsa-miR-449c-5p;hsa-miR-3929;hsa-miR-9-5p;NC_000002.12_3880;hsa-miR-98-5p;NC_000017.11_32431;hsa-miR-22-5p;hsa-miR-6511b-5p;NC_000010.11_22861;hsa-miR-215-3p;NC_000011.10_24785;hsa-miR-4443
CNTNAP2	26047	hsa_circ_0059354	0.577778	1.20105e-31	18	hsa-miR-193a-5p;NC_000014.9_29046;hsa-miR-27a-3p;hsa-miR-6842-3p;hsa-miR-181c-5p;hsa-miR-9-5p;hsa-miR-449c-5p;hsa-miR-3929;NC_000016.10_31213;NC_000002.12_3880;hsa-miR-98-5p;NC_000017.11_32431;hsa-miR-181a-5p;hsa-miR-22-5p;NC_000010.11_22861;hsa-miR-6511b-5p;NC_000011.10_24785;hsa-miR-4443
MSH2	4436	hsa_circ_0008221	0.0817308	1.21016e-31	20	hsa-miR-328-3p;hsa-miR-193a-5p;NC_000014.9_29046;hsa-miR-27a-3p;hsa-miR-24-3p;hsa-miR-659-5p;hsa-miR-6842-3p;hsa-miR-9-5p;NC_000002.12_3880;hsa-miR-3929;hsa-miR-664a-5p;hsa-miR-98-5p;NC_000017.11_32431;hsa-miR-203a-3p;hsa-miR-6511b-5p;hsa-miR-22-5p;NC_000011.10_24785;NC_000020.11_34751;hsa-miR-4443;NC_000009.12_21531
SYNPO	11346	hsa_circ_0006957	0.129252	1.37312e-31	19	hsa-miR-30d-5p;hsa-miR-193a-5p;hsa-miR-155-5p;NC_000014.9_29046;NC_000016.10_31515;NC_000003.12_9115;hsa-miR-215-5p;hsa-miR-24-3p;hsa-miR-659-5p;hsa-miR-6807-5p;NC_000001.11_1021;hsa-miR-449c-5p;hsa-miR-3929;hsa-miR-9-5p;hsa-miR-664a-5p;hsa-miR-22-5p;NC_000010.11_22861;NC_000011.10_24785;NC_000020.11_34751
FANCA	2175	hsa_circ_0059354	0.555556	1.39177e-31	19	hsa-miR-30d-5p;hsa-miR-193a-5p;NC_000014.9_29046;hsa-miR-27a-3p;hsa-miR-24-3p;hsa-miR-6842-3p;hsa-miR-181c-5p;hsa-miR-22-3p;hsa-miR-449c-5p;hsa-miR-3929;hsa-miR-9-5p;hsa-miR-148a-3p;NC_000017.11_32431;hsa-miR-181a-5p;hsa-miR-6511b-5p;hsa-miR-22-5p;hsa-miR-215-3p;NC_000011.10_24785;hsa-miR-4443
KIF11	3832	hsa_circ_0008221	0.0769231	1.43786e-31	18	hsa-miR-30d-5p;hsa-miR-21-5p;NC_000003.12_9115;hsa-miR-6842-3p;hsa-miR-369-3p;hsa-miR-9-5p;hsa-miR-22-3p;hsa-miR-3929;hsa-miR-664a-5p;NC_000002.12_3880;hsa-miR-98-5p;NC_000017.11_32431;hsa-miR-203a-3p;NC_000004.12_10963;hsa-miR-22-5p;NC_000011.10_24785;NC_000020.11_34751;NC_000009.12_21531
STIL	6491	hsa_circ_0008221	0.0697115	1.43786e-31	18	hsa-miR-30d-5p;hsa-miR-193a-5p;hsa-miR-155-5p;hsa-miR-27a-3p;NC_000003.12_9115;hsa-miR-24-3p;hsa-miR-6842-3p;hsa-miR-9-5p;hsa-miR-3929;hsa-miR-98-5p;NC_000017.11_32431;hsa-miR-22-5p;hsa-miR-6511b-5p;NC_000010.11_22861;NC_000004.12_10963;NC_000011.10_24785;NC_000020.11_34751;NC_000009.12_21531
PPARGC1A	10891	hsa_circ_0086848	0.44898	1.82495e-31	17	hsa-miR-328-3p;hsa-miR-193a-5p;hsa-miR-4443;hsa-miR-24-3p;hsa-miR-659-5p;hsa-miR-6842-3p;hsa-miR-9-5p;hsa-miR-22-3p;hsa-miR-3929;hsa-miR-98-5p;NC_000017.11_32431;NC_000019.10_34428;hsa-miR-203a-3p;hsa-miR-22-5p;NC_000010.11_22861;NC_000011.10_23882;hsa-miR-183-5p
FGFR2	2263	hsa_circ_0086848	0.55102	1.82495e-31	17	hsa-miR-193a-5p;hsa-miR-24-3p;hsa-miR-6842-3p;NC_000005.10_13790;hsa-miR-9-5p;hsa-miR-22-3p;hsa-miR-449c-5p;hsa-miR-3929;hsa-miR-369-3p;hsa-miR-4435;NC_000017.11_32431;NC_000019.10_34428;hsa-miR-98-5p;hsa-miR-22-5p;hsa-miR-6511b-5p;NC_000010.11_22861;hsa-miR-4443
PRICKLE2	166336	hsa_circ_0052203	0.75	1.8284e-31	19	NC_000014.9_29046;hsa-miR-6842-3p;hsa-miR-181c-5p;hsa-miR-22-3p;hsa-miR-449c-5p;hsa-miR-3929;hsa-miR-4435;NC_000002.12_3880;hsa-miR-98-5p;NC_000017.11_32431;NC_000017.11_32431*;hsa-miR-6511b-5p;hsa-miR-22-5p;NC_000011.10_24785;NC_000010.11_22289;NC_000010.11_22861;NC_000020.11_34751;hsa-miR-4443;NC_000009.12_21531
CLIP4	79745	hsa_circ_0059713	0.560976	2.02048e-31	22	hsa-miR-573;hsa-miR-548i;hsa-miR-582-5p;hsa-miR-3529-3p;hsa-miR-34c-5p;NC_000023.11_36905;NC_000021.9_35751;NC_000003.12_9133;hsa-miR-373-5p;NC_000018.10_33504*;hsa-miR-526b-5p;NC_000002.12_3238;NC_000006.12_15769;NC_000018.10_33037;hsa-miR-3662;hsa-miR-92a-3p;NC_000010.11_23646;NC_000016.10_31157;hsa-miR-7-5p;hsa-miR-372-5p;hsa-miR-20a-5p;NC_000011.10_25384
PDE4D	5144	hsa_circ_0059354	0.511111	2.54562e-31	18	hsa-miR-30d-5p;hsa-miR-193a-5p;hsa-miR-27a-3p;NC_000024.10_38844;hsa-miR-24-3p;hsa-miR-6842-3p;hsa-miR-181c-5p;hsa-miR-22-3p;hsa-miR-9-5p;hsa-miR-3929;NC_000002.12_3880;NC_000017.11_32431;hsa-miR-181a-5p;hsa-miR-6511b-5p;hsa-miR-22-5p;hsa-miR-215-3p;NC_000011.10_24785;hsa-miR-4443
GCLC	2729	hsa_circ_0059713	0.512195	2.5638e-31	21	hsa-miR-92a-3p;hsa-miR-3662;NC_000009.12_21957;hsa-miR-20a-5p;NC_000016.10_31157;NC_000011.10_25384;NC_000003.12_9133;NC_000001.11_2997;NC_000010.11_23646;NC_000022.11_36437;hsa-miR-373-5p;hsa-miR-548i;hsa-miR-582-5p;NC_000009.12_21925;hsa-miR-1323;NC_000002.12_3238;hsa-miR-205-5p;NC_000018.10_33037;hsa-miR-3529-3p;hsa-miR-34c-5p;NC_000006.12_15769
MPP2	4355	hsa_circ_0052203	0.555556	2.58433e-31	17	NC_000014.9_29046;hsa-miR-26b-5p;hsa-miR-6842-3p;hsa-miR-6807-5p;hsa-miR-449c-5p;hsa-miR-3929;hsa-miR-4435;hsa-miR-98-5p;hsa-miR-148a-3p;NC_000017.11_32431;NC_000017.11_32431*;hsa-miR-642a-5p;hsa-miR-22-5p;NC_000011.10_24785;NC_000010.11_22861;NC_000020.11_34751;NC_000009.12_21531
TNFSF15	9966	hsa_circ_0053716	0.563636	2.61336e-31	23	hsa-miR-15b-3p;hsa-miR-5585-3p;hsa-miR-7974;NC_000023.11_38289;NC_000010.11_23303;NC_000018.10_33504*;NC_000009.12_20733;NC_000002.12_3238;hsa-miR-3662;hsa-miR-520a-3p;hsa-miR-92a-3p;hsa-miR-302c-5p;NC_000001.11_3101;NC_000010.11_23646;hsa-miR-92a-1-5p;hsa-miR-372-5p;NC_000007.14_17824;hsa-let-7c-5p;hsa-miR-512-3p;hsa-miR-510-5p;hsa-miR-302b-5p;hsa-miR-1323;NC_000008.11_20037
OAS3	4940	hsa_circ_0086848	0.653061	2.72687e-31	18	hsa-miR-328-3p;hsa-miR-193a-5p;hsa-miR-4443;hsa-miR-24-3p;hsa-miR-6842-3p;NC_000005.10_13790;hsa-miR-9-5p;hsa-miR-22-3p;hsa-miR-3929;hsa-miR-449c-5p;hsa-miR-4435;hsa-miR-148a-3p;NC_000017.11_32431;NC_000019.10_34428;hsa-miR-203a-3p;hsa-miR-6511b-5p;hsa-miR-22-5p;hsa-miR-183-5p
SYNPO	11346	hsa_circ_0086848	0.693878	2.72687e-31	18	hsa-miR-328-3p;hsa-miR-193a-5p;hsa-miR-24-3p;hsa-miR-659-5p;hsa-miR-6842-3p;NC_000005.10_13790;hsa-miR-9-5p;hsa-miR-449c-5p;hsa-miR-3929;hsa-miR-4435;hsa-miR-98-5p;hsa-miR-148a-3p;NC_000017.11_32431;hsa-miR-203a-3p;hsa-miR-22-5p;hsa-miR-6511b-5p;NC_000010.11_22861;hsa-miR-4443
ANK1	286	hsa_circ_0052203	0.722222	2.93927e-31	18	NC_000014.9_29046;hsa-miR-26b-5p;hsa-miR-6842-3p;hsa-miR-181c-5p;hsa-miR-22-3p;hsa-miR-449c-5p;hsa-miR-3929;hsa-miR-4435;hsa-miR-98-5p;NC_000017.11_32431;NC_000017.11_32431*;hsa-miR-6511b-5p;hsa-miR-642a-5p;hsa-miR-22-5p;NC_000011.10_24785;NC_000020.11_34751;hsa-miR-4443;NC_000009.12_21531
MKI67	4288	hsa_circ_0052203	0.666667	2.93927e-31	18	NC_000024.10_38844;hsa-miR-6842-3p;hsa-miR-181c-5p;hsa-miR-22-3p;hsa-miR-449c-5p;NC_000002.12_3880;hsa-miR-4435;hsa-miR-98-5p;NC_000017.11_32431;NC_000017.11_32431*;hsa-miR-6511b-5p;hsa-miR-22-5p;NC_000011.10_24785;NC_000010.11_22289;NC_000010.11_22861;NC_000020.11_34751;hsa-miR-4443;NC_000009.12_21531
TNFRSF19	55504	hsa_circ_0059354	0.466667	3.16922e-31	17	hsa-miR-30d-5p;hsa-miR-193a-5p;hsa-miR-27a-3p;NC_000024.10_38844;hsa-miR-24-3p;hsa-miR-6842-3p;hsa-miR-22-3p;hsa-miR-449c-5p;hsa-miR-3929;hsa-miR-9-5p;hsa-miR-98-5p;hsa-miR-4758-3p;hsa-miR-6511b-5p;NC_000010.11_22861;hsa-miR-215-3p;NC_000011.10_24785;hsa-miR-4443
CNTRL	11064	hsa_circ_0059354	0.6	3.16922e-31	17	hsa-miR-193a-5p;NC_000024.10_38844;hsa-miR-24-3p;hsa-miR-6842-3p;hsa-miR-181c-5p;hsa-miR-22-3p;hsa-miR-9-5p;hsa-miR-3929;NC_000016.10_31213;NC_000002.12_3880;hsa-miR-98-5p;hsa-miR-181a-5p;hsa-miR-22-5p;NC_000010.11_22861;hsa-miR-6511b-5p;NC_000011.10_24785;hsa-miR-4443
MAP3K2	10746	hsa_circ_0076332	0.675676	3.49184e-31	23	NC_000003.12_7520;hsa-miR-573;hsa-miR-3143;NC_000003.12_8583;NC_000003.12_7973;hsa-miR-15b-3p;hsa-miR-5585-3p;NC_000007.14_17821;hsa-miR-34c-5p;NC_000010.11_23303;NC_000012.12_26286;NC_000006.12_15769;hsa-miR-3662;hsa-miR-520c-3p;hsa-miR-372-5p;NC_000013.11_27627;hsa-miR-17-5p;NC_000018.10_33742;hsa-miR-20a-5p;hsa-miR-512-3p;hsa-miR-302b-5p;hsa-miR-1323;NC_000008.11_20037
LCOR	84458	hsa_circ_0076332	0.675676	3.95138e-31	22	NC_000003.12_7520;hsa-miR-573;hsa-miR-3143;NC_000003.12_7973;hsa-miR-15b-3p;NC_000007.14_17821;hsa-miR-34c-5p;hsa-miR-522-3p;NC_000010.11_23303;hsa-miR-373-5p;NC_000012.12_26286;NC_000006.12_15769;hsa-miR-520c-3p;NC_000008.11_20037*;hsa-miR-27b-5p;hsa-miR-372-5p;NC_000013.11_27627;hsa-miR-17-5p;NC_000008.11_19445;NC_000018.10_33742;hsa-miR-20a-5p;hsa-miR-1323
ATP2B4	493	hsa_circ_0076332	0.702703	5.05117e-31	23	NC_000003.12_7520;NC_000003.12_8583;NC_000003.12_7973;hsa-miR-5585-3p;NC_000007.14_17821;hsa-miR-18a-3p;hsa-miR-34c-5p;hsa-miR-302a-5p;NC_000010.11_23303;hsa-miR-373-5p;NC_000012.12_26286;NC_000006.12_15769;hsa-miR-3662;hsa-miR-520c-3p;hsa-miR-27b-5p;hsa-miR-372-5p;NC_000013.11_27627;hsa-miR-17-5p;NC_000018.10_33742;hsa-miR-20a-5p;hsa-miR-512-3p;hsa-miR-302b-5p;hsa-miR-1323
PBX1	5087	hsa_circ_0012566	0.76	5.18395e-31	17	hsa-miR-499a-5p;hsa-miR-21-5p;hsa-miR-193a-5p;NC_000016.10_31515;hsa-miR-24-3p;NC_000011.10_23882;hsa-miR-181c-5p;hsa-miR-22-3p;hsa-miR-9-5p;hsa-miR-664a-5p;hsa-miR-203a-3p;hsa-miR-181a-5p;hsa-miR-22-5p;NC_000010.11_22861;NC_000008.11_18787;hsa-miR-6511b-5p;NC_000009.12_21531
NFIB	4781	hsa_circ_0059354	0.577778	5.22737e-31	18	hsa-miR-30d-5p;hsa-miR-193a-5p;NC_000014.9_29046;hsa-miR-27a-3p;NC_000024.10_38844;hsa-miR-6842-3p;hsa-miR-181c-5p;hsa-miR-22-3p;hsa-miR-449c-5p;hsa-miR-3929;hsa-miR-9-5p;hsa-miR-98-5p;hsa-miR-148a-3p;hsa-miR-181a-5p;hsa-miR-22-5p;NC_000010.11_22861;hsa-miR-215-3p;NC_000011.10_24785
ABLIM3	22885	hsa_circ_0059713	0.560976	5.92905e-31	22	hsa-miR-573;hsa-miR-548i;hsa-miR-3529-3p;hsa-miR-34c-5p;NC_000006.12_16700;NC_000023.11_36905;hsa-miR-7974;hsa-miR-373-5p;NC_000018.10_33504*;NC_000009.12_21925;hsa-miR-526b-5p;NC_000002.12_3238;NC_000018.10_33037;NC_000005.10_11919>NC_000005.10_11920;NC_000009.12_21957;NC_000001.11_2997;NC_000022.11_36437;hsa-miR-205-5p;hsa-miR-372-5p;hsa-miR-20a-5p;NC_000011.10_25384;NC_000003.12_7276
KCNAB2	8514	hsa_circ_0008221	0.0793269	6.13012e-31	19	hsa-miR-328-3p;hsa-miR-193a-5p;NC_000014.9_29046;hsa-miR-27a-3p;hsa-miR-24-3p;hsa-miR-6842-3p;hsa-miR-9-5p;hsa-miR-449c-5p;hsa-miR-3929;hsa-miR-22-3p;hsa-miR-664a-5p;NC_000017.11_32431;NC_000019.10_34428;hsa-miR-181a-5p;hsa-miR-6511b-5p;NC_000016.10_31515;NC_000011.10_24785;hsa-miR-4443;NC_000009.12_21531
INPP5D	3635	hsa_circ_0052203	0.555556	6.22934e-31	17	NC_000014.9_29046;hsa-miR-26b-5p;NC_000024.10_38844;hsa-miR-6842-3p;hsa-miR-6807-5p;hsa-miR-22-3p;hsa-miR-449c-5p;NC_000002.12_3880;hsa-miR-4435;NC_000017.11_32431;NC_000017.11_32431*;hsa-miR-6511b-5p;hsa-miR-642a-5p;hsa-miR-22-5p;NC_000011.10_24785;NC_000010.11_22289;NC_000010.11_22861
FGFR2	2263	hsa_circ_0052203	0.527778	6.22934e-31	17	hsa-miR-26b-5p;NC_000024.10_38844;hsa-miR-6842-3p;hsa-miR-6807-5p;hsa-miR-181c-5p;hsa-miR-22-3p;hsa-miR-449c-5p;hsa-miR-3929;hsa-miR-4435;hsa-miR-98-5p;NC_000017.11_32431;NC_000017.11_32431*;hsa-miR-22-5p;hsa-miR-6511b-5p;NC_000010.11_22861;NC_000010.11_22289;hsa-miR-4443
FANCC	2176	hsa_circ_0059354	0.377778	8.04331e-31	17	hsa-miR-30d-5p;hsa-miR-193a-5p;NC_000014.9_29046;hsa-miR-27a-3p;NC_000024.10_38844;hsa-miR-24-3p;hsa-miR-6842-3p;hsa-miR-22-3p;hsa-miR-449c-5p;hsa-miR-9-5p;NC_000002.12_3880;hsa-miR-4758-3p;hsa-miR-148a-3p;NC_000017.11_32431;NC_000010.11_22861;NC_000011.10_24785;hsa-miR-4443
OCLN	100506658	hsa_circ_0076332	0.621622	8.93701e-31	21	hsa-miR-522-3p;NC_000013.11_27627;NC_000008.11_19445;hsa-miR-3662;hsa-miR-520c-3p;NC_000003.12_7520;NC_000008.11_20037*;hsa-miR-573;NC_000018.10_33742;hsa-miR-20a-5p;hsa-miR-512-3p;hsa-miR-373-5p;NC_000008.11_20037;hsa-miR-3143;NC_000003.12_7973;hsa-miR-15b-3p;hsa-miR-1323;NC_000007.14_17821;hsa-miR-17-5p;hsa-miR-34c-5p;hsa-miR-18a-3p
CISH	1154	hsa_circ_0086848	0.795918	9.28405e-31	17	hsa-miR-328-3p;hsa-miR-4443;hsa-miR-24-3p;hsa-miR-6842-3p;hsa-miR-9-5p;hsa-miR-22-3p;hsa-miR-3929;hsa-miR-449c-5p;hsa-miR-4435;hsa-miR-98-5p;NC_000017.11_32431;NC_000019.10_34428;hsa-miR-148a-3p;hsa-miR-22-5p;hsa-miR-6511b-5p;NC_000010.11_22861;hsa-miR-183-5p
WDR62	284403	hsa_circ_0086848	0.571429	9.28405e-31	17	hsa-miR-328-3p;hsa-miR-193a-5p;hsa-miR-24-3p;hsa-miR-659-5p;hsa-miR-6842-3p;NC_000005.10_13790;hsa-miR-9-5p;hsa-miR-449c-5p;hsa-miR-98-5p;hsa-miR-4435;NC_000017.11_32431;NC_000019.10_34428;hsa-miR-6511b-5p;hsa-miR-22-5p;NC_000011.10_23882;NC_000010.11_22861;hsa-miR-4443
E2F2	1870	hsa_circ_0086848	0.530612	9.28405e-31	17	hsa-miR-328-3p;hsa-miR-193a-5p;hsa-miR-4443;hsa-miR-24-3p;hsa-miR-659-5p;hsa-miR-6842-3p;NC_000005.10_13790;hsa-miR-9-5p;hsa-miR-22-3p;hsa-miR-3929;hsa-miR-4435;hsa-miR-98-5p;hsa-miR-148a-3p;NC_000019.10_34428;hsa-miR-6511b-5p;hsa-miR-22-5p;hsa-miR-183-5p
C17orf53	78995	hsa_circ_0052203	0.472222	9.55997e-31	16	NC_000014.9_29046;hsa-miR-6842-3p;hsa-miR-22-3p;hsa-miR-449c-5p;hsa-miR-3929;hsa-miR-4435;NC_000002.12_3880;hsa-miR-98-5p;NC_000017.11_32431;NC_000017.11_32431*;hsa-miR-6511b-5p;hsa-miR-642a-5p;hsa-miR-22-5p;NC_000011.10_24785;NC_000010.11_22289;hsa-miR-4443
ARHGEF39	84904	hsa_circ_0052203	0.611111	9.55997e-31	16	NC_000024.10_38844;hsa-miR-26b-5p;hsa-miR-6842-3p;hsa-miR-6807-5p;NC_000002.12_3880;hsa-miR-3929;hsa-miR-4435;NC_000017.11_32431;NC_000017.11_32431*;hsa-miR-6511b-5p;hsa-miR-22-5p;NC_000011.10_24785;NC_000010.11_22289;NC_000020.11_34751;hsa-miR-4443;NC_000009.12_21531
ANK1	286	hsa_circ_0059354	0.644444	1.04276e-30	18	hsa-miR-193a-5p;NC_000014.9_29046;hsa-miR-27a-3p;hsa-miR-24-3p;hsa-miR-6842-3p;hsa-miR-181c-5p;hsa-miR-9-5p;hsa-miR-449c-5p;hsa-miR-3929;hsa-miR-22-3p;hsa-miR-98-5p;NC_000017.11_32431;hsa-miR-181a-5p;hsa-miR-6511b-5p;hsa-miR-22-5p;hsa-miR-215-3p;NC_000011.10_24785;hsa-miR-4443
RFC3	5983	hsa_circ_0059354	0.511111	1.04276e-30	18	hsa-miR-193a-5p;NC_000014.9_29046;hsa-miR-27a-3p;NC_000024.10_38844;hsa-miR-24-3p;hsa-miR-6842-3p;hsa-miR-9-5p;hsa-miR-449c-5p;hsa-miR-3929;hsa-miR-98-5p;hsa-miR-4758-3p;NC_000017.11_32431;hsa-miR-181a-5p;hsa-miR-22-5p;NC_000010.11_22861;hsa-miR-6511b-5p;NC_000011.10_24785;hsa-miR-4443
PRSS37	136242	hsa_circ_0012566	0.76	1.06721e-30	17	hsa-miR-30d-5p;hsa-miR-21-5p;hsa-miR-499a-5p;hsa-miR-193a-5p;NC_000003.12_9115;hsa-miR-24-3p;hsa-miR-181c-5p;hsa-miR-22-3p;hsa-miR-9-5p;hsa-miR-664a-5p;hsa-miR-203a-3p;hsa-miR-181a-5p;hsa-miR-6511b-5p;hsa-miR-22-5p;NC_000008.11_18787;NC_000011.10_23882;NC_000009.12_21531
SYNPO	11346	hsa_circ_0052203	0.611111	1.08269e-30	18	NC_000014.9_29046;hsa-miR-6842-3p;hsa-miR-6807-5p;hsa-miR-181c-5p;NC_000002.12_3880;hsa-miR-449c-5p;hsa-miR-3929;hsa-miR-4435;hsa-miR-98-5p;hsa-miR-148a-3p;NC_000017.11_32431;hsa-miR-6511b-5p;hsa-miR-22-5p;NC_000011.10_24785;NC_000010.11_22289;NC_000010.11_22861;NC_000020.11_34751;hsa-miR-4443
IQGAP3	128239	hsa_circ_0052203	0.694444	1.08269e-30	18	NC_000014.9_29046;NC_000024.10_38844;hsa-miR-6842-3p;hsa-miR-181c-5p;hsa-miR-22-3p;hsa-miR-449c-5p;hsa-miR-3929;hsa-miR-4435;NC_000002.12_3880;hsa-miR-98-5p;NC_000017.11_32431*;hsa-miR-6511b-5p;hsa-miR-22-5p;NC_000011.10_24785;NC_000010.11_22289;NC_000020.11_34751;hsa-miR-4443;NC_000009.12_21531
USP2	9099	hsa_circ_0008221	0.0721154	1.17555e-30	16	hsa-miR-328-3p;hsa-miR-193a-5p;hsa-miR-30d-5p;hsa-miR-27a-3p;NC_000003.12_9115;hsa-miR-24-3p;hsa-miR-659-5p;hsa-miR-22-3p;hsa-miR-449c-5p;NC_000016.10_31213;hsa-miR-3929;hsa-miR-9-5p;hsa-miR-98-5p;NC_000016.10_31515;NC_000011.10_24785;hsa-miR-4443
MAP3K2	10746	hsa_circ_0053716	0.618182	1.21829e-30	23	hsa-miR-15b-3p;hsa-miR-5585-3p;hsa-miR-3529-3p;NC_000007.14_17821;hsa-miR-3155a;NC_000023.11_38289;NC_000003.12_9133;NC_000010.11_23303;NC_000018.10_33504*;NC_000009.12_20733;NC_000002.12_3238;hsa-miR-3662;hsa-miR-520a-3p;hsa-miR-302c-5p;NC_000001.11_3101;NC_000010.11_23646;hsa-miR-92a-1-5p;hsa-miR-372-5p;hsa-let-7c-5p;hsa-miR-512-3p;hsa-miR-302b-5p;hsa-miR-1323;NC_000008.11_20037
RALGPS2	55103	hsa_circ_0059713	0.682927	1.55152e-30	24	hsa-miR-582-5p;hsa-miR-3529-3p;hsa-miR-34c-5p;NC_000006.12_16700;NC_000023.11_36905;hsa-miR-302a-5p;NC_000003.12_9133;hsa-miR-373-5p;NC_000018.10_33504*;NC_000009.12_21925;hsa-miR-526b-5p;NC_000002.12_3238;NC_000006.12_15769;hsa-miR-3662;NC_000010.11_23646;NC_000016.10_31157;NC_000022.11_36437;hsa-miR-7-5p;hsa-miR-205-5p;hsa-miR-372-5p;hsa-miR-20a-5p;NC_000011.10_25384;hsa-miR-371a-5p;hsa-miR-1323
GTSE1	51512	hsa_circ_0008221	0.0865385	1.66068e-30	19	hsa-miR-499a-5p;hsa-miR-193a-5p;hsa-miR-24-3p;hsa-miR-6842-3p;hsa-miR-181c-5p;hsa-miR-9-5p;hsa-miR-449c-5p;hsa-miR-22-3p;hsa-miR-3929;hsa-miR-369-3p;NC_000017.11_32431;NC_000019.10_34428;hsa-miR-181a-5p;hsa-miR-22-5p;NC_000016.10_31515;hsa-miR-6511b-5p;NC_000011.10_24785;NC_000020.11_34751;NC_000009.12_21531
PROKR2	128674	hsa_circ_0059713	0.536585	1.6656e-30	21	hsa-miR-3662;NC_000009.12_21957;NC_000021.9_35751;hsa-miR-7974;hsa-miR-573;hsa-miR-526b-5p;NC_000003.12_9133;NC_000001.11_2997;NC_000010.11_23646;hsa-miR-20a-5p;NC_000011.10_25384;NC_000018.10_33504*;hsa-miR-582-5p;NC_000009.12_21925;hsa-miR-1323;NC_000002.12_3238;NC_000022.11_36437;NC_000005.10_11919>NC_000005.10_11920;NC_000008.11_20037;hsa-miR-34c-5p;NC_000006.12_15769
FGFR2	2263	hsa_circ_0059354	0.488889	1.93807e-30	17	hsa-miR-193a-5p;NC_000024.10_38844;hsa-miR-24-3p;hsa-miR-6842-3p;hsa-miR-181c-5p;hsa-miR-22-3p;hsa-miR-449c-5p;hsa-miR-3929;hsa-miR-9-5p;hsa-miR-98-5p;NC_000017.11_32431;hsa-miR-181a-5p;hsa-miR-22-5p;NC_000010.11_22861;hsa-miR-6511b-5p;hsa-miR-215-3p;hsa-miR-4443
IGFBP5	3488	hsa_circ_0086848	0.571429	1.97621e-30	17	hsa-miR-328-3p;hsa-miR-24-3p;hsa-miR-659-5p;hsa-miR-6842-3p;NC_000005.10_13790;hsa-miR-22-3p;hsa-miR-449c-5p;hsa-miR-3929;hsa-miR-4435;hsa-miR-98-5p;hsa-miR-148a-3p;hsa-miR-203a-3p;hsa-miR-22-5p;hsa-miR-6511b-5p;NC_000010.11_22861;NC_000011.10_23882;hsa-miR-4443
MCM4	4173	hsa_circ_0086848	0.510204	1.97621e-30	17	hsa-miR-328-3p;hsa-miR-193a-5p;hsa-miR-4443;hsa-miR-659-5p;hsa-miR-6842-3p;NC_000005.10_13790;hsa-miR-22-3p;hsa-miR-449c-5p;hsa-miR-3929;hsa-miR-9-5p;hsa-miR-4435;hsa-miR-98-5p;NC_000017.11_32431;NC_000019.10_34428;hsa-miR-6511b-5p;NC_000010.11_22861;hsa-miR-183-5p
HELLS	3070	hsa_circ_0059354	0.577778	2.02536e-30	18	hsa-miR-30d-5p;hsa-miR-193a-5p;hsa-miR-27a-3p;NC_000024.10_38844;hsa-miR-24-3p;hsa-miR-6842-3p;hsa-miR-181c-5p;hsa-miR-9-5p;NC_000002.12_3880;hsa-miR-3929;hsa-miR-98-5p;NC_000017.11_32431;hsa-miR-181a-5p;hsa-miR-6511b-5p;NC_000010.11_22861;hsa-miR-215-3p;NC_000011.10_24785;hsa-miR-4443
STOX1	219736	hsa_circ_0008221	0.0793269	2.02536e-30	18	hsa-miR-328-3p;hsa-miR-155-5p;hsa-miR-27a-3p;hsa-miR-215-5p;hsa-miR-6842-3p;hsa-miR-181c-5p;hsa-miR-22-3p;hsa-miR-449c-5p;hsa-miR-3929;NC_000016.10_31213;hsa-miR-9-5p;hsa-miR-664a-5p;NC_000017.11_32431;hsa-miR-98-5p;hsa-miR-203a-3p;hsa-miR-6511b-5p;hsa-miR-22-5p;NC_000011.10_23882
MATN2	4147	hsa_circ_0008221	0.0552885	2.02536e-30	18	hsa-miR-328-3p;hsa-miR-499a-5p;hsa-miR-21-5p;hsa-miR-193a-5p;hsa-miR-27a-3p;NC_000016.10_31515;hsa-miR-24-3p;hsa-miR-659-5p;hsa-miR-181c-5p;hsa-miR-22-3p;hsa-miR-449c-5p;hsa-miR-3929;hsa-miR-98-5p;NC_000017.11_32431;hsa-miR-181a-5p;hsa-miR-22-5p;NC_000010.11_22861;hsa-miR-6511b-5p
MXD1	4084	hsa_circ_0059713	0.609756	2.16751e-30	23	hsa-miR-573;hsa-miR-582-5p;hsa-miR-3529-3p;NC_000006.12_16700;NC_000023.11_36905;hsa-miR-302a-5p;hsa-miR-7974;NC_000003.12_9133;hsa-miR-373-5p;NC_000018.10_33504*;hsa-miR-526b-5p;NC_000002.12_3238;NC_000006.12_15769;NC_000018.10_33037;hsa-miR-3662;NC_000005.10_11919>NC_000005.10_11920;hsa-miR-92a-3p;NC_000010.11_23646;NC_000022.11_36437;hsa-miR-205-5p;hsa-miR-20a-5p;NC_000011.10_25384;hsa-miR-371…
TIPARP	25976	hsa_circ_0076332	0.621622	2.40394e-30	21	NC_000008.11_19445;hsa-miR-302a-5p;hsa-miR-3662;hsa-miR-520c-3p;NC_000018.10_33742;hsa-miR-573;hsa-miR-20a-5p;hsa-miR-18a-3p;NC_000010.11_23303;hsa-miR-548j-3p;hsa-miR-373-5p;NC_000008.11_20037;NC_000012.12_26286;hsa-miR-3143;hsa-miR-27b-5p;hsa-miR-15b-3p;hsa-miR-302b-5p;hsa-miR-372-5p;hsa-miR-17-5p;NC_000007.14_17821;hsa-miR-522-3p
ARHGAP5	394	hsa_circ_0076332	0.648649	2.40394e-30	21	hsa-miR-522-3p;NC_000013.11_27627;NC_000008.11_19445;hsa-miR-520c-3p;NC_000003.12_7520;NC_000008.11_20037*;hsa-miR-573;NC_000018.10_33742;hsa-miR-20a-5p;hsa-miR-373-5p;NC_000008.11_20037;hsa-miR-3143;hsa-miR-27b-5p;NC_000003.12_7973;hsa-miR-15b-3p;NC_000006.12_15769;hsa-miR-1323;hsa-miR-372-5p;hsa-miR-17-5p;NC_000007.14_17821;hsa-miR-18a-3p
FRAS1	80144	hsa_circ_0053716	0.636364	2.94521e-30	22	hsa-miR-15b-3p;hsa-miR-3529-3p;NC_000007.14_17821;hsa-miR-3155a;NC_000021.9_35751;hsa-miR-7974;NC_000003.12_9133;NC_000010.11_23303;NC_000018.10_33504*;NC_000009.12_20733;NC_000002.12_3238;hsa-miR-3662;hsa-miR-520a-3p;NC_000001.11_3101;NC_000010.11_23646;hsa-miR-92a-1-5p;hsa-miR-372-5p;hsa-let-7c-5p;hsa-miR-512-3p;hsa-miR-510-5p;hsa-miR-302b-5p;NC_000008.11_20037
CTAGE5		hsa_circ_0059713	0.536585	2.99507e-30	21	NC_000006.12_16700;hsa-miR-302a-5p;hsa-miR-3662;hsa-miR-526b-5p;NC_000016.10_31157;hsa-miR-20a-5p;NC_000003.12_9133;NC_000011.10_25384;NC_000010.11_23646;NC_000022.11_36437;hsa-miR-373-5p;NC_000018.10_33504*;hsa-miR-582-5p;NC_000009.12_21925;hsa-miR-1323;hsa-miR-372-5p;NC_000002.12_3238;hsa-miR-205-5p;NC_000018.10_33037;hsa-miR-3529-3p;hsa-miR-34c-5p
NAV2	89797	hsa_circ_0012566	0.8	3.02019e-30	18	hsa-miR-30d-5p;hsa-miR-21-5p;hsa-miR-499a-5p;hsa-miR-193a-5p;NC_000003.12_9115;NW_003315954.1_39634;hsa-miR-24-3p;hsa-miR-181c-5p;hsa-miR-22-3p;hsa-miR-449c-5p;hsa-miR-9-5p;hsa-miR-664a-5p;hsa-miR-181a-5p;hsa-miR-22-5p;NC_000010.11_22861;NC_000008.11_18787;hsa-miR-6511b-5p;NC_000009.12_21531
PRICKLE2	166336	hsa_circ_0012566	0.84	3.02019e-30	18	hsa-miR-499a-5p;hsa-miR-21-5p;hsa-miR-193a-5p;NW_003315954.1_39634;hsa-miR-24-3p;NC_000011.10_23882;hsa-miR-181c-5p;hsa-miR-22-3p;hsa-miR-449c-5p;hsa-miR-9-5p;hsa-miR-664a-5p;hsa-miR-203a-3p;hsa-miR-181a-5p;hsa-miR-22-5p;NC_000010.11_22861;NC_000008.11_18787;hsa-miR-6511b-5p;NC_000009.12_21531
TRIM14	9830	hsa_circ_0052203	0.611111	3.1667e-30	17	hsa-miR-26b-5p;hsa-miR-6842-3p;hsa-miR-181c-5p;hsa-miR-22-3p;hsa-miR-449c-5p;hsa-miR-3929;hsa-miR-4435;NC_000002.12_3880;hsa-miR-98-5p;hsa-miR-148a-3p;hsa-miR-6511b-5p;hsa-miR-642a-5p;NC_000010.11_22861;NC_000011.10_24785;NC_000010.11_22289;hsa-miR-4443;NC_000009.12_21531
CCNF	899	hsa_circ_0052203	0.638889	3.1667e-30	17	hsa-miR-6842-3p;hsa-miR-6807-5p;hsa-miR-181c-5p;hsa-miR-22-3p;hsa-miR-449c-5p;hsa-miR-3929;hsa-miR-4435;NC_000002.12_3880;hsa-miR-98-5p;NC_000017.11_32431;hsa-miR-148a-3p;hsa-miR-6511b-5p;hsa-miR-22-5p;NC_000011.10_24785;NC_000020.11_34751;hsa-miR-4443;NC_000009.12_21531
ABCC4	10257	hsa_circ_0059713	0.634146	3.2855e-30	23	hsa-miR-573;hsa-miR-582-5p;hsa-miR-3529-3p;NC_000006.12_16700;NC_000021.9_35751;hsa-miR-7974;NC_000003.12_9133;hsa-miR-373-5p;NC_000018.10_33504*;NC_000009.12_21925;hsa-miR-526b-5p;NC_000002.12_3238;NC_000006.12_15769;NC_000018.10_33037;hsa-miR-3662;NC_000005.10_11919>NC_000005.10_11920;NC_000010.11_23646;NC_000016.10_31157;hsa-miR-205-5p;hsa-miR-372-5p;NC_000003.12_7276;hsa-miR-1323;NC_000008.11…
BTN3A1	11119	hsa_circ_0008221	0.0625	3.30627e-30	17	hsa-miR-499a-5p;hsa-miR-155-5p;hsa-miR-27a-3p;hsa-miR-24-3p;hsa-miR-6842-3p;hsa-miR-22-3p;hsa-miR-449c-5p;NC_000016.10_31213;hsa-miR-3929;hsa-miR-98-5p;NC_000017.11_32431;NC_000019.10_34428;hsa-miR-203a-3p;hsa-miR-6511b-5p;hsa-miR-22-5p;NC_000011.10_24785;NC_000010.11_22861
OAS3	4940	hsa_circ_0059354	0.555556	3.83819e-30	18	hsa-miR-193a-5p;NC_000024.10_38844;hsa-miR-24-3p;hsa-miR-6842-3p;hsa-miR-181c-5p;hsa-miR-9-5p;hsa-miR-449c-5p;hsa-miR-22-3p;hsa-miR-3929;NC_000002.12_3880;hsa-miR-4758-3p;NC_000017.11_32431;hsa-miR-148a-3p;hsa-miR-6511b-5p;hsa-miR-22-5p;hsa-miR-215-3p;NC_000011.10_24785;hsa-miR-4443
CBX2	84733	hsa_circ_0086848	0.571429	4.0669e-30	17	hsa-miR-328-3p;hsa-miR-193a-5p;hsa-miR-4443;hsa-miR-24-3p;hsa-miR-6842-3p;NC_000005.10_13790;hsa-miR-9-5p;hsa-miR-22-3p;hsa-miR-3929;hsa-miR-4435;hsa-miR-98-5p;NC_000019.10_34428;hsa-miR-203a-3p;hsa-miR-22-5p;hsa-miR-6511b-5p;NC_000010.11_22861;hsa-miR-183-5p
CNTNAP2	26047	hsa_circ_0086848	0.489796	4.0669e-30	17	hsa-miR-328-3p;hsa-miR-193a-5p;hsa-miR-4443;hsa-miR-659-5p;hsa-miR-6842-3p;hsa-miR-369-3p;hsa-miR-9-5p;hsa-miR-449c-5p;hsa-miR-3929;hsa-miR-98-5p;NC_000017.11_32431;NC_000019.10_34428;hsa-miR-22-5p;hsa-miR-6511b-5p;NC_000010.11_22861;NC_000011.10_23882;hsa-miR-183-5p
NFIB	4781	hsa_circ_0012566	0.76	4.13495e-30	17	hsa-miR-30d-5p;hsa-miR-21-5p;hsa-miR-499a-5p;hsa-miR-193a-5p;NC_000003.12_9115;NW_003315954.1_39634;hsa-miR-181c-5p;hsa-miR-22-3p;hsa-miR-449c-5p;hsa-miR-9-5p;hsa-miR-203a-3p;hsa-miR-181a-5p;hsa-miR-22-5p;NC_000010.11_22861;NC_000008.11_18787;NC_000011.10_23882;NC_000009.12_21531
NFIB	4781	hsa_circ_0006957	0.112245	5.03284e-30	18	hsa-miR-30d-5p;hsa-miR-21-5p;hsa-miR-193a-5p;hsa-miR-27a-3p;NC_000014.9_29046;NC_000003.12_9115;hsa-miR-22-3p;NC_000001.11_1021;hsa-miR-3929;hsa-miR-449c-5p;hsa-miR-9-5p;hsa-miR-5701;NC_000012.12_26540;hsa-miR-22-5p;NC_000010.11_22861;NC_000011.10_23882;NC_000011.10_24785;NC_000020.11_34751
NOM1	64434	hsa_circ_0053716	0.509091	5.14752e-30	20	NC_000007.14_17824;NC_000019.10_34542;hsa-miR-520a-3p;NC_000002.12_3238;hsa-miR-92a-3p;hsa-let-7c-5p;hsa-miR-302c-5p;NC_000003.12_9133;NC_000001.11_3101;NC_000010.11_23646;hsa-miR-512-3p;hsa-miR-548i;NC_000018.10_33504*;hsa-miR-92a-1-5p;hsa-miR-510-5p;hsa-miR-302b-5p;hsa-miR-15b-3p;hsa-miR-5585-3p;hsa-miR-372-5p;hsa-miR-3662
RAP2A	5911	hsa_circ_0059713	0.536585	5.29659e-30	21	NC_000006.12_16700;hsa-miR-3662;NC_000009.12_21957;NC_000021.9_35751;hsa-miR-7974;hsa-miR-526b-5p;NC_000016.10_31157;hsa-miR-20a-5p;NC_000010.11_23646;hsa-miR-373-5p;NC_000018.10_33504*;hsa-miR-582-5p;NC_000008.11_20037;hsa-miR-371a-5p;hsa-miR-1323;hsa-miR-372-5p;NC_000006.12_15769;hsa-miR-7-5p;NC_000005.10_11919>NC_000005.10_11920;hsa-miR-3529-3p;hsa-miR-34c-5p
SLC1A2	6506	hsa_circ_0006957	0.142857	6.22303e-30	17	hsa-miR-30d-5p;NC_000014.9_29046;hsa-miR-155-5p;hsa-miR-27a-3p;NC_000003.12_9115;hsa-miR-215-5p;hsa-miR-24-3p;hsa-miR-22-3p;hsa-miR-449c-5p;NC_000016.10_31213;hsa-miR-3929;hsa-miR-9-5p;hsa-miR-5701;hsa-miR-664a-5p;hsa-miR-22-5p;NC_000011.10_24785;NC_000020.11_34751
ARHGEF19	128272	hsa_circ_0008221	0.0721154	6.53621e-30	18	hsa-miR-328-3p;hsa-miR-193a-5p;hsa-miR-21-5p;NC_000014.9_29046;hsa-miR-24-3p;hsa-miR-659-5p;hsa-miR-6842-3p;hsa-miR-22-3p;hsa-miR-449c-5p;hsa-miR-3929;NC_000002.12_3880;hsa-miR-98-5p;NC_000017.11_32431;hsa-miR-6511b-5p;hsa-miR-22-5p;NC_000011.10_24785;NC_000010.11_22861;hsa-miR-4443
CDCA7	83879	hsa_circ_0008221	0.0552885	6.53621e-30	18	hsa-miR-30d-5p;hsa-miR-499a-5p;hsa-miR-155-5p;NC_000003.12_9115;hsa-miR-659-5p;hsa-miR-6842-3p;hsa-miR-181c-5p;hsa-miR-369-3p;hsa-miR-449c-5p;hsa-miR-3929;hsa-miR-98-5p;NC_000017.11_32431;NC_000019.10_34428;hsa-miR-181a-5p;hsa-miR-6511b-5p;hsa-miR-22-5p;NC_000011.10_24785;NC_000009.12_21531
PLK4	10733	hsa_circ_0008221	0.0480769	6.53621e-30	18	hsa-miR-328-3p;hsa-miR-499a-5p;hsa-miR-21-5p;hsa-miR-155-5p;hsa-miR-27a-3p;hsa-miR-24-3p;hsa-miR-659-5p;hsa-miR-369-3p;hsa-miR-9-5p;NC_000002.12_3880;hsa-miR-3929;hsa-miR-98-5p;NC_000017.11_32431;hsa-miR-203a-3p;hsa-miR-22-5p;NC_000011.10_23882;NC_000011.10_24785;NC_000009.12_21531
RGS5	8490	hsa_circ_0008221	0.0673077	6.53621e-30	18	hsa-miR-328-3p;hsa-miR-499a-5p;hsa-miR-21-5p;hsa-miR-193a-5p;hsa-miR-6842-3p;hsa-miR-181c-5p;hsa-miR-369-3p;hsa-miR-449c-5p;hsa-miR-3929;hsa-miR-664a-5p;NC_000002.12_3880;hsa-miR-203a-3p;hsa-miR-181a-5p;hsa-miR-6511b-5p;hsa-miR-22-5p;NC_000004.12_10963;NC_000011.10_24785;NC_000009.12_21531
MCM4	4173	hsa_circ_0052203	0.527778	6.73817e-30	17	NC_000014.9_29046;NC_000024.10_38844;hsa-miR-6842-3p;hsa-miR-6807-5p;hsa-miR-181c-5p;hsa-miR-22-3p;hsa-miR-449c-5p;hsa-miR-3929;hsa-miR-4435;NC_000002.12_3880;hsa-miR-98-5p;NC_000017.11_32431;hsa-miR-6511b-5p;hsa-miR-642a-5p;NC_000010.11_22861;NC_000020.11_34751;hsa-miR-4443
ARHGEF19	128272	hsa_circ_0086848	0.489796	6.86899e-30	16	hsa-miR-328-3p;hsa-miR-193a-5p;hsa-miR-24-3p;hsa-miR-659-5p;hsa-miR-6842-3p;NC_000005.10_13790;hsa-miR-22-3p;hsa-miR-449c-5p;hsa-miR-3929;hsa-miR-4435;hsa-miR-98-5p;NC_000017.11_32431;hsa-miR-6511b-5p;hsa-miR-22-5p;NC_000010.11_22861;hsa-miR-4443
CASC5		hsa_circ_0030467	0.638298	7.82914e-30	15	hsa-miR-499a-5p;hsa-miR-21-5p;hsa-miR-181c-5p;NC_000002.12_3880;NC_000011.10_23807;hsa-miR-3929;hsa-miR-4435;hsa-miR-664a-5p;hsa-miR-9-5p;hsa-miR-203a-3p;NC_000023.11_37419;hsa-miR-22-5p;hsa-miR-6761-5p;hsa-miR-3189-3p;NC_000009.12_21531
SOCS3	9021	hsa_circ_0052203	0.5	7.91994e-30	16	NC_000014.9_29046;hsa-miR-26b-5p;NC_000024.10_38844;hsa-miR-6842-3p;hsa-miR-6807-5p;hsa-miR-22-3p;NC_000002.12_3880;hsa-miR-3929;hsa-miR-6511b-5p;hsa-miR-642a-5p;hsa-miR-22-5p;NC_000011.10_24785;NC_000010.11_22289;NC_000010.11_22861;NC_000020.11_34751;hsa-miR-4443
DNMT1	1786	hsa_circ_0052203	0.5	7.91994e-30	16	hsa-miR-6842-3p;hsa-miR-181c-5p;hsa-miR-22-3p;NC_000002.12_3880;hsa-miR-3929;hsa-miR-4435;hsa-miR-98-5p;hsa-miR-148a-3p;NC_000017.11_32431*;hsa-miR-6511b-5p;hsa-miR-642a-5p;hsa-miR-22-5p;NC_000011.10_24785;NC_000010.11_22289;NC_000020.11_34751;NC_000009.12_21531
RGS3	5998	hsa_circ_0012566	0.84	8.0175e-30	18	hsa-miR-30d-5p;hsa-miR-21-5p;hsa-miR-499a-5p;hsa-miR-193a-5p;NC_000003.12_9115;hsa-miR-24-3p;NC_000011.10_23882;hsa-miR-181c-5p;hsa-miR-22-3p;hsa-miR-449c-5p;hsa-miR-9-5p;hsa-miR-203a-3p;hsa-miR-181a-5p;hsa-miR-22-5p;NC_000010.11_22861;NC_000008.11_18787;hsa-miR-6511b-5p;NC_000009.12_21531
TICRR	90381	hsa_circ_0086848	0.673469	8.11577e-30	17	hsa-miR-328-3p;hsa-miR-193a-5p;hsa-miR-24-3p;hsa-miR-6842-3p;hsa-miR-9-5p;hsa-miR-22-3p;hsa-miR-3929;hsa-miR-449c-5p;hsa-miR-4435;hsa-miR-98-5p;NC_000017.11_32431;hsa-miR-148a-3p;hsa-miR-203a-3p;hsa-miR-6511b-5p;hsa-miR-22-5p;NC_000011.10_23882;hsa-miR-183-5p
ROBO1	6091	hsa_circ_0059354	0.533333	9.84492e-30	17	hsa-miR-193a-5p;NC_000014.9_29046;hsa-miR-27a-3p;hsa-miR-24-3p;hsa-miR-6842-3p;hsa-miR-181c-5p;hsa-miR-22-3p;NC_000002.12_3880;hsa-miR-3929;hsa-miR-98-5p;hsa-miR-148a-3p;NC_000017.11_32431;hsa-miR-22-5p;hsa-miR-6511b-5p;hsa-miR-215-3p;NC_000011.10_24785;hsa-miR-4443
BCOR	54880	hsa_circ_0059354	0.511111	9.84492e-30	17	hsa-miR-30d-5p;hsa-miR-193a-5p;hsa-miR-27a-3p;hsa-miR-24-3p;hsa-miR-6842-3p;hsa-miR-9-5p;hsa-miR-22-3p;hsa-miR-3929;NC_000002.12_3880;hsa-miR-98-5p;NC_000017.11_32431;hsa-miR-181a-5p;hsa-miR-6511b-5p;hsa-miR-22-5p;hsa-miR-215-3p;NC_000011.10_24785;hsa-miR-4443
WDR62	284403	hsa_circ_0059354	0.555556	9.84492e-30	17	hsa-miR-193a-5p;NC_000014.9_29046;hsa-miR-27a-3p;hsa-miR-24-3p;hsa-miR-6842-3p;hsa-miR-9-5p;hsa-miR-449c-5p;NC_000002.12_3880;hsa-miR-98-5p;hsa-miR-4758-3p;NC_000017.11_32431;hsa-miR-22-5p;hsa-miR-6511b-5p;hsa-miR-215-3p;NC_000011.10_24785;NC_000010.11_22861;hsa-miR-4443
DCAF4L2	138009	hsa_circ_0008221	0.0456731	1.04986e-29	16	hsa-miR-328-3p;hsa-miR-30d-5p;hsa-miR-21-5p;hsa-miR-155-5p;NC_000003.12_9115;hsa-miR-215-5p;hsa-miR-24-3p;hsa-miR-659-5p;hsa-miR-181c-5p;hsa-miR-9-5p;hsa-miR-3929;NC_000017.11_32431;hsa-miR-181a-5p;NC_000011.10_24785;NC_000020.11_34751;NC_000009.12_21531
ERN1	2081	hsa_circ_0059713	0.634146	1.09405e-29	23	hsa-miR-548i;hsa-miR-582-5p;hsa-miR-3529-3p;hsa-miR-34c-5p;NC_000006.12_16700;NC_000021.9_35751;NC_000003.12_9133;hsa-miR-373-5p;NC_000018.10_33504*;NC_000009.12_21925;hsa-miR-526b-5p;NC_000002.12_3238;NC_000006.12_15769;NC_000005.10_11919>NC_000005.10_11920;NC_000009.12_21957;NC_000001.11_2997;NC_000010.11_23646;NC_000022.11_36437;hsa-miR-205-5p;hsa-miR-372-5p;NC_000011.10_25384;NC_000003.12_727…
PROM2	150696	hsa_circ_0008221	0.0793269	1.44406e-29	17	hsa-miR-193a-5p;hsa-miR-24-3p;hsa-miR-6842-3p;hsa-miR-181c-5p;hsa-miR-22-3p;hsa-miR-369-3p;hsa-miR-3929;hsa-miR-664a-5p;NC_000002.12_3880;hsa-miR-98-5p;hsa-miR-203a-3p;hsa-miR-181a-5p;hsa-miR-6511b-5p;hsa-miR-22-5p;NC_000011.10_24785;NC_000010.11_22861;NC_000020.11_34751
SPTLC3	55304	hsa_circ_0008221	0.0745192	1.44406e-29	17	hsa-miR-328-3p;hsa-miR-30d-5p;hsa-miR-21-5p;hsa-miR-155-5p;hsa-miR-499a-5p;NC_000003.12_9115;hsa-miR-659-5p;hsa-miR-6842-3p;hsa-miR-181c-5p;hsa-miR-3929;hsa-miR-98-5p;hsa-miR-181a-5p;hsa-miR-22-5p;NC_000010.11_22861;hsa-miR-6511b-5p;NC_000011.10_24785;NC_000020.11_34751
KIF15	56992	hsa_circ_0008221	0.0504808	1.44406e-29	17	hsa-miR-499a-5p;NC_000016.10_31515;hsa-miR-215-5p;hsa-miR-24-3p;hsa-miR-181c-5p;hsa-miR-9-5p;hsa-miR-22-3p;hsa-miR-3929;hsa-miR-664a-5p;NC_000002.12_3880;hsa-miR-98-5p;NC_000017.11_32431;NC_000019.10_34428;hsa-miR-181a-5p;hsa-miR-6511b-5p;hsa-miR-22-5p;NC_000011.10_24785
BLM	641	hsa_circ_0008221	0.0552885	1.44406e-29	17	hsa-miR-30d-5p;hsa-miR-21-5p;hsa-miR-499a-5p;hsa-miR-27a-3p;NC_000016.10_31515;hsa-miR-193a-5p;NC_000003.12_9115;hsa-miR-659-5p;hsa-miR-369-3p;hsa-miR-3929;hsa-miR-664a-5p;hsa-miR-98-5p;hsa-miR-6511b-5p;NC_000004.12_10963;hsa-miR-22-5p;hsa-miR-4443;NC_000009.12_21531
ZNF850	342892	hsa_circ_0008221	0.129808	1.44406e-29	17	hsa-miR-27a-3p;hsa-miR-215-5p;hsa-miR-6842-3p;hsa-miR-181c-5p;hsa-miR-9-5p;hsa-miR-369-3p;hsa-miR-3929;hsa-miR-664a-5p;NC_000002.12_3880;hsa-miR-98-5p;NC_000019.10_34428;hsa-miR-181a-5p;hsa-miR-6511b-5p;NC_000004.12_10963;NC_000011.10_23882;NC_000020.11_34751;hsa-miR-4443
CCNE2	9134	hsa_circ_0008221	0.0504808	1.44406e-29	17	hsa-miR-30d-5p;hsa-miR-27a-3p;NC_000003.12_9115;hsa-miR-24-3p;hsa-miR-659-5p;hsa-miR-6842-3p;hsa-miR-369-3p;hsa-miR-9-5p;NC_000002.12_3880;hsa-miR-98-5p;hsa-miR-664a-5p;hsa-miR-203a-3p;hsa-miR-22-5p;NC_000011.10_23882;NC_000010.11_22861;hsa-miR-4443;NC_000009.12_21531
MAP3K1	4214	hsa_circ_0086848	0.489796	1.57457e-29	17	hsa-miR-328-3p;hsa-miR-193a-5p;hsa-miR-4443;hsa-miR-24-3p;hsa-miR-659-5p;hsa-miR-6842-3p;hsa-miR-369-3p;hsa-miR-9-5p;hsa-miR-22-3p;hsa-miR-3929;hsa-miR-4435;hsa-miR-98-5p;NC_000017.11_32431;hsa-miR-203a-3p;hsa-miR-22-5p;NC_000011.10_23882;hsa-miR-183-5p
FIGN	55137	hsa_circ_0086848	0.55102	1.57457e-29	17	hsa-miR-328-3p;hsa-miR-193a-5p;hsa-miR-24-3p;hsa-miR-659-5p;hsa-miR-6842-3p;hsa-miR-369-3p;hsa-miR-9-5p;hsa-miR-22-3p;hsa-miR-3929;hsa-miR-4435;hsa-miR-98-5p;NC_000017.11_32431;hsa-miR-203a-3p;hsa-miR-6511b-5p;hsa-miR-22-5p;NC_000011.10_23882;hsa-miR-183-5p
CPEB2	132864	hsa_circ_0059713	0.560976	1.6109e-29	23	hsa-miR-3529-3p;hsa-miR-34c-5p;NC_000006.12_16700;hsa-miR-302a-5p;NC_000023.11_36905;hsa-miR-7974;NC_000003.12_9133;hsa-miR-373-5p;NC_000018.10_33504*;NC_000009.12_21925;hsa-miR-526b-5p;NC_000002.12_3238;hsa-miR-3662;NC_000009.12_21957;NC_000010.11_23646;NC_000016.10_31157;NC_000022.11_36437;hsa-miR-7-5p;hsa-miR-205-5p;hsa-miR-20a-5p;NC_000011.10_25384;hsa-miR-1323;NC_000008.11_20037
CCNA2	890	hsa_circ_0052203	0.5	1.73555e-29	15	NC_000024.10_38844;hsa-miR-26b-5p;hsa-miR-6807-5p;hsa-miR-22-3p;hsa-miR-449c-5p;hsa-miR-98-5p;hsa-miR-148a-3p;NC_000017.11_32431;NC_000017.11_32431*;hsa-miR-6511b-5p;hsa-miR-22-5p;NC_000011.10_24785;NC_000010.11_22289;NC_000010.11_22861;NC_000009.12_21531
RBBP8NL	140893	hsa_circ_0052203	0.555556	1.73555e-29	15	NC_000014.9_29046;hsa-miR-6842-3p;hsa-miR-22-3p;hsa-miR-449c-5p;hsa-miR-3929;hsa-miR-4435;hsa-miR-148a-3p;hsa-miR-6511b-5p;hsa-miR-642a-5p;hsa-miR-22-5p;NC_000011.10_24785;NC_000010.11_22289;NC_000020.11_34751;hsa-miR-4443;NC_000009.12_21531
PRKG2	5593	hsa_circ_0059713	0.560976	1.75301e-29	22	hsa-miR-548i;hsa-miR-582-5p;hsa-miR-34c-5p;NC_000006.12_16700;hsa-miR-302a-5p;hsa-miR-7974;NC_000003.12_9133;hsa-miR-373-5p;NC_000018.10_33504*;NC_000002.12_3238;NC_000006.12_15769;hsa-miR-3662;NC_000005.10_11919>NC_000005.10_11920;NC_000009.12_21957;NC_000001.11_2997;NC_000010.11_23646;NC_000016.10_31157;NC_000022.11_36437;hsa-miR-205-5p;hsa-miR-372-5p;hsa-miR-20a-5p;hsa-miR-371a-5p
LYST	1130	hsa_circ_0059713	0.682927	1.76671e-29	24	hsa-miR-573;hsa-miR-3529-3p;hsa-miR-34c-5p;NC_000006.12_16700;NC_000021.9_35751;hsa-miR-7974;hsa-miR-373-5p;NC_000018.10_33504*;NC_000009.12_21925;hsa-miR-526b-5p;NC_000002.12_3238;NC_000006.12_15769;NC_000018.10_33037;hsa-miR-3662;NC_000010.11_23646;NC_000016.10_31157;NC_000022.11_36437;hsa-miR-7-5p;hsa-miR-205-5p;hsa-miR-372-5p;hsa-miR-20a-5p;NC_000011.10_25384;hsa-miR-1323;NC_000008.11_20037
DPYSL3	1809	hsa_circ_0008221	0.0889423	1.94709e-29	18	hsa-miR-328-3p;hsa-miR-193a-5p;hsa-miR-21-5p;NC_000014.9_29046;hsa-miR-27a-3p;hsa-miR-215-5p;hsa-miR-24-3p;hsa-miR-6842-3p;hsa-miR-9-5p;hsa-miR-22-3p;hsa-miR-3929;hsa-miR-664a-5p;NC_000002.12_3880;NC_000017.11_32431;hsa-miR-22-5p;NC_000011.10_23882;NC_000011.10_24785;NC_000020.11_34751
ARHGEF19	128272	hsa_circ_0052203	0.555556	2.05314e-29	16	NC_000014.9_29046;hsa-miR-6842-3p;hsa-miR-22-3p;hsa-miR-449c-5p;hsa-miR-3929;hsa-miR-4435;NC_000002.12_3880;hsa-miR-98-5p;NC_000017.11_32431;NC_000017.11_32431*;hsa-miR-6511b-5p;hsa-miR-22-5p;NC_000011.10_24785;NC_000010.11_22289;NC_000010.11_22861;hsa-miR-4443
FIGNL1	63979	hsa_circ_0059354	0.533333	2.09405e-29	17	hsa-miR-193a-5p;hsa-miR-27a-3p;NC_000024.10_38844;hsa-miR-6842-3p;hsa-miR-181c-5p;hsa-miR-22-3p;hsa-miR-449c-5p;hsa-miR-3929;NC_000002.12_3880;hsa-miR-98-5p;NC_000017.11_32431;hsa-miR-181a-5p;hsa-miR-6511b-5p;hsa-miR-22-5p;hsa-miR-215-3p;NC_000011.10_24785;hsa-miR-4443
PLEKHA6	22874	hsa_circ_0086848	0.693878	2.25545e-29	18	hsa-miR-328-3p;hsa-miR-193a-5p;hsa-miR-24-3p;hsa-miR-659-5p;hsa-miR-6842-3p;NC_000005.10_13790;hsa-miR-9-5p;hsa-miR-22-3p;hsa-miR-3929;hsa-miR-369-3p;hsa-miR-4435;hsa-miR-98-5p;NC_000017.11_32431;hsa-miR-203a-3p;hsa-miR-22-5p;hsa-miR-6511b-5p;NC_000010.11_22861;hsa-miR-4443
PLCE1	51196	hsa_circ_0030467	0.659574	2.56662e-29	15	hsa-miR-499a-5p;hsa-miR-181c-5p;NC_000002.12_3880;hsa-miR-22-3p;hsa-miR-3929;NC_000011.10_23807;hsa-miR-4435;hsa-miR-664a-5p;hsa-miR-9-5p;hsa-miR-203a-3p;NC_000023.11_37419;hsa-miR-22-5p;hsa-miR-6761-5p;hsa-miR-3189-3p;NC_000009.12_21531
UVSSA	57654	hsa_circ_0059713	0.560976	2.67414e-29	21	NC_000006.12_16700;NC_000023.11_36905;hsa-miR-3662;NC_000009.12_21957;hsa-miR-7974;hsa-miR-573;hsa-miR-526b-5p;NC_000016.10_31157;NC_000011.10_25384;hsa-miR-548i;NC_000018.10_33504*;hsa-miR-7-5p;NC_000003.12_7276;NC_000009.12_21925;NC_000005.10_11919>NC_000005.10_11920;hsa-miR-1323;NC_000002.12_3238;hsa-miR-205-5p;NC_000018.10_33037;hsa-miR-34c-5p;NC_000006.12_15769
TICRR	90381	hsa_circ_0052203	0.611111	2.76514e-29	17	NC_000014.9_29046;NC_000024.10_38844;hsa-miR-6842-3p;hsa-miR-6807-5p;hsa-miR-181c-5p;hsa-miR-22-3p;hsa-miR-449c-5p;hsa-miR-3929;hsa-miR-4435;hsa-miR-98-5p;hsa-miR-148a-3p;NC_000017.11_32431;NC_000017.11_32431*;hsa-miR-6511b-5p;hsa-miR-22-5p;NC_000011.10_24785;NC_000009.12_21531
CLSPN	63967	hsa_circ_0052203	0.638889	2.76514e-29	17	NC_000024.10_38844;hsa-miR-6842-3p;hsa-miR-181c-5p;hsa-miR-22-3p;NC_000002.12_3880;hsa-miR-3929;hsa-miR-4435;hsa-miR-98-5p;NC_000017.11_32431;hsa-miR-6511b-5p;hsa-miR-642a-5p;hsa-miR-22-5p;NC_000011.10_24785;NC_000010.11_22861;NC_000020.11_34751;hsa-miR-4443;NC_000009.12_21531
MKI67	4288	hsa_circ_0086848	0.673469	2.97677e-29	17	hsa-miR-193a-5p;hsa-miR-24-3p;hsa-miR-659-5p;hsa-miR-6842-3p;NC_000005.10_13790;hsa-miR-9-5p;hsa-miR-22-3p;hsa-miR-449c-5p;hsa-miR-369-3p;hsa-miR-4435;hsa-miR-98-5p;NC_000017.11_32431;hsa-miR-203a-3p;hsa-miR-22-5p;hsa-miR-6511b-5p;NC_000010.11_22861;hsa-miR-4443
SLC7A11	23657	hsa_circ_0076332	0.675676	3.07916e-29	22	hsa-miR-573;hsa-miR-3143;NC_000003.12_7973;hsa-miR-15b-3p;hsa-miR-5585-3p;NC_000007.14_17821;hsa-miR-302a-5p;hsa-miR-373-5p;NC_000012.12_26286;NC_000006.12_15769;hsa-miR-3662;hsa-miR-520c-3p;hsa-miR-27b-5p;hsa-miR-372-5p;hsa-miR-17-5p;NC_000008.11_19445;NC_000018.10_33742;hsa-miR-20a-5p;hsa-miR-512-3p;hsa-miR-302b-5p;hsa-miR-1323;NC_000008.11_20037
IQGAP3	128239	hsa_circ_0006957	0.112245	3.68712e-29	18	hsa-miR-193a-5p;hsa-miR-21-5p;NC_000014.9_29046;hsa-miR-27a-3p;hsa-miR-215-5p;hsa-miR-24-3p;hsa-miR-22-3p;NC_000001.11_1021;hsa-miR-3929;hsa-miR-449c-5p;hsa-miR-9-5p;hsa-miR-664a-5p;NC_000012.12_26540;NC_000019.10_34428;hsa-miR-22-5p;NC_000016.10_31515;NC_000011.10_24785;NC_000020.11_34751
GALNT5	11227	hsa_circ_0053716	0.618182	3.79759e-29	23	hsa-miR-548i;hsa-miR-5585-3p;hsa-miR-3529-3p;NC_000007.14_17821;NC_000003.12_9133;NC_000010.11_23303;NC_000018.10_33504*;NC_000009.12_20733;NC_000002.12_3238;hsa-miR-3662;hsa-miR-520a-3p;hsa-miR-302c-5p;NC_000001.11_3101;NC_000010.11_23646;hsa-miR-92a-1-5p;hsa-miR-372-5p;NC_000007.14_17824;hsa-let-7c-5p;hsa-miR-512-3p;hsa-miR-510-5p;hsa-miR-302b-5p;hsa-miR-1323;NC_000008.11_20037
MSH2	4436	hsa_circ_0059354	0.444444	4.30621e-29	17	hsa-miR-193a-5p;NC_000014.9_29046;hsa-miR-27a-3p;NC_000024.10_38844;hsa-miR-24-3p;hsa-miR-6842-3p;hsa-miR-9-5p;NC_000002.12_3880;hsa-miR-3929;hsa-miR-98-5p;hsa-miR-4758-3p;NC_000017.11_32431;hsa-miR-22-5p;hsa-miR-6511b-5p;hsa-miR-215-3p;NC_000011.10_24785;hsa-miR-4443
PDGFRA	5156	hsa_circ_0052203	0.527778	5.02471e-29	16	NC_000024.10_38844;hsa-miR-6842-3p;hsa-miR-181c-5p;NC_000002.12_3880;hsa-miR-449c-5p;hsa-miR-3929;hsa-miR-4435;hsa-miR-98-5p;hsa-miR-148a-3p;NC_000017.11_32431;hsa-miR-6511b-5p;hsa-miR-22-5p;NC_000011.10_24785;NC_000010.11_22289;NC_000010.11_22861;NC_000009.12_21531
ISL1	3670	hsa_circ_0008221	0.0480769	5.41355e-29	18	hsa-miR-328-3p;hsa-miR-30d-5p;hsa-miR-27a-3p;NC_000003.12_9115;hsa-miR-24-3p;hsa-miR-6842-3p;hsa-miR-369-3p;hsa-miR-9-5p;hsa-miR-22-3p;hsa-miR-3929;hsa-miR-664a-5p;NC_000002.12_3880;hsa-miR-98-5p;NC_000017.11_32431;hsa-miR-203a-3p;hsa-miR-6511b-5p;NC_000010.11_22861;NC_000011.10_24785
DDX51	317781	hsa_circ_0008221	0.0745192	5.41355e-29	18	hsa-miR-328-3p;NC_000014.9_29046;hsa-miR-27a-3p;hsa-miR-24-3p;hsa-miR-659-5p;hsa-miR-6842-3p;hsa-miR-22-3p;hsa-miR-3929;hsa-miR-664a-5p;NC_000017.11_32431;NC_000019.10_34428;hsa-miR-181a-5p;hsa-miR-22-5p;NC_000016.10_31515;hsa-miR-6511b-5p;NC_000011.10_24785;NC_000020.11_34751;hsa-miR-4443
NUDT21	11051	hsa_circ_0008221	0.0552885	5.41355e-29	18	hsa-miR-499a-5p;hsa-miR-21-5p;hsa-miR-27a-3p;hsa-miR-659-5p;hsa-miR-181c-5p;hsa-miR-9-5p;hsa-miR-22-3p;hsa-miR-369-3p;hsa-miR-664a-5p;NC_000002.12_3880;hsa-miR-203a-3p;hsa-miR-181a-5p;hsa-miR-6511b-5p;hsa-miR-22-5p;NC_000011.10_23882;NC_000011.10_24785;hsa-miR-4443;NC_000009.12_21531
LMNB2	84823	hsa_circ_0008221	0.0817308	5.4928e-29	19	hsa-miR-328-3p;hsa-miR-499a-5p;NC_000014.9_29046;hsa-miR-27a-3p;hsa-miR-215-5p;hsa-miR-24-3p;hsa-miR-22-3p;hsa-miR-449c-5p;hsa-miR-9-5p;NC_000002.12_3880;NC_000017.11_32431;NC_000019.10_34428;hsa-miR-203a-3p;hsa-miR-181a-5p;hsa-miR-22-5p;NC_000016.10_31515;hsa-miR-6511b-5p;NC_000011.10_24785;hsa-miR-4443
ESCO2	157570	hsa_circ_0008221	0.0528846	5.49481e-29	17	hsa-miR-30d-5p;hsa-miR-499a-5p;NC_000003.12_9115;hsa-miR-215-5p;hsa-miR-24-3p;hsa-miR-181c-5p;hsa-miR-22-3p;hsa-miR-449c-5p;hsa-miR-9-5p;NC_000017.11_32431;hsa-miR-203a-3p;hsa-miR-181a-5p;hsa-miR-22-5p;NC_000010.11_22861;hsa-miR-6511b-5p;NC_000020.11_34751;NC_000009.12_21531
BUB1	699	hsa_circ_0008221	0.0552885	5.49481e-29	17	hsa-miR-21-5p;hsa-miR-155-5p;hsa-miR-27a-3p;hsa-miR-24-3p;hsa-miR-659-5p;hsa-miR-6842-3p;hsa-miR-369-3p;hsa-miR-9-5p;hsa-miR-449c-5p;hsa-miR-664a-5p;NC_000017.11_32431;hsa-miR-203a-3p;hsa-miR-22-5p;hsa-miR-6511b-5p;NC_000010.11_22861;NC_000011.10_23882;NC_000009.12_21531
FRMD4B	23150	hsa_circ_0012566	0.72	5.69403e-29	16	hsa-miR-30d-5p;hsa-miR-21-5p;NC_000003.12_9115;NC_000016.10_31515;NW_003315954.1_39634;hsa-miR-24-3p;hsa-miR-22-3p;hsa-miR-9-5p;NC_000016.10_31213;hsa-miR-203a-3p;hsa-miR-22-5p;hsa-miR-6511b-5p;NC_000010.11_22861;NC_000008.11_18787;NC_000011.10_23882;NC_000009.12_21531
DBF4	10926	hsa_circ_0008221	0.0432692	6.59799e-29	16	hsa-miR-328-3p;hsa-miR-30d-5p;NC_000014.9_29046;hsa-miR-155-5p;NC_000003.12_9115;hsa-miR-27a-3p;hsa-miR-6842-3p;hsa-miR-181c-5p;NC_000002.12_3880;hsa-miR-98-5p;hsa-miR-203a-3p;hsa-miR-181a-5p;NC_000004.12_10963;hsa-miR-22-5p;NC_000011.10_24785;NC_000009.12_21531
SETMAR	6419	hsa_circ_0012566	0.64	7.13043e-29	15	hsa-miR-30d-5p;hsa-miR-21-5p;hsa-miR-193a-5p;NW_003315954.1_39634;hsa-miR-24-3p;hsa-miR-181c-5p;hsa-miR-22-3p;hsa-miR-449c-5p;NC_000016.10_31213;hsa-miR-9-5p;hsa-miR-664a-5p;hsa-miR-181a-5p;hsa-miR-6511b-5p;hsa-miR-22-5p;NC_000011.10_23882
ZRANB3	84083	hsa_circ_0006957	0.0952381	7.60002e-29	17	hsa-miR-30d-5p;hsa-miR-193a-5p;hsa-miR-155-5p;hsa-miR-27a-3p;NC_000014.9_29046;NC_000003.12_9115;hsa-miR-215-5p;hsa-miR-6807-5p;NC_000001.11_1021;hsa-miR-449c-5p;NC_000016.10_31213;hsa-miR-9-5p;hsa-miR-664a-5p;NC_000012.12_26540;NC_000010.11_22861;NC_000011.10_23882;NC_000020.11_34751
NCOA3	8202	hsa_circ_0076332	0.648649	8.25355e-29	21	hsa-miR-522-3p;NC_000008.11_19445;hsa-miR-3662;hsa-miR-520c-3p;NC_000003.12_7520;NC_000018.10_33742;hsa-miR-573;hsa-miR-20a-5p;NC_000010.11_23303;hsa-miR-512-3p;NC_000008.11_20037;NC_000012.12_26286;hsa-miR-3143;NC_000003.12_7973;hsa-miR-15b-3p;NC_000006.12_15769;hsa-miR-1323;hsa-miR-372-5p;hsa-miR-17-5p;NC_000007.14_17821;hsa-miR-18a-3p
LZTS1	11178	hsa_circ_0059354	0.6	8.58696e-29	17	hsa-miR-30d-5p;hsa-miR-193a-5p;NC_000014.9_29046;hsa-miR-24-3p;hsa-miR-6842-3p;hsa-miR-9-5p;hsa-miR-22-3p;hsa-miR-3929;NC_000002.12_3880;hsa-miR-98-5p;hsa-miR-4758-3p;NC_000017.11_32431;hsa-miR-22-5p;hsa-miR-6511b-5p;hsa-miR-215-3p;NC_000011.10_24785;hsa-miR-4443
CIT	11113	hsa_circ_0059354	0.666667	8.58696e-29	17	hsa-miR-30d-5p;hsa-miR-193a-5p;NC_000014.9_29046;hsa-miR-27a-3p;hsa-miR-24-3p;hsa-miR-6842-3p;hsa-miR-181c-5p;hsa-miR-9-5p;hsa-miR-22-3p;hsa-miR-98-5p;hsa-miR-181a-5p;hsa-miR-22-5p;NC_000010.11_22861;hsa-miR-6511b-5p;hsa-miR-215-3p;NC_000011.10_24785;hsa-miR-4443
TRANK1	9881	hsa_circ_0086848	0.632653	8.70844e-29	16	hsa-miR-193a-5p;hsa-miR-24-3p;hsa-miR-659-5p;hsa-miR-6842-3p;hsa-miR-9-5p;hsa-miR-22-3p;hsa-miR-3929;hsa-miR-4435;hsa-miR-98-5p;NC_000017.11_32431;hsa-miR-203a-3p;hsa-miR-6511b-5p;hsa-miR-22-5p;NC_000011.10_23882;NC_000010.11_22861;hsa-miR-4443
SORBS2	8470	hsa_circ_0052203	0.5	1.16899e-28	16	hsa-miR-26b-5p;NC_000024.10_38844;hsa-miR-6842-3p;hsa-miR-6807-5p;hsa-miR-22-3p;hsa-miR-3929;hsa-miR-98-5p;hsa-miR-148a-3p;NC_000017.11_32431;hsa-miR-6511b-5p;hsa-miR-22-5p;NC_000011.10_24785;NC_000010.11_22289;NC_000010.11_22861;hsa-miR-4443;NC_000009.12_21531
TRMT5	57570	hsa_circ_0012566	0.64	1.17417e-28	16	hsa-miR-30d-5p;hsa-miR-193a-5p;NC_000003.12_9115;hsa-miR-24-3p;hsa-miR-181c-5p;hsa-miR-9-5p;hsa-miR-449c-5p;hsa-miR-22-3p;hsa-miR-664a-5p;hsa-miR-203a-3p;hsa-miR-181a-5p;hsa-miR-22-5p;NC_000016.10_31515;NC_000008.11_18787;NC_000011.10_23882;NC_000009.12_21531
CPEB4	80315	hsa_circ_0076332	0.594595	1.23336e-28	21	hsa-miR-522-3p;NC_000013.11_27627;NC_000008.11_19445;hsa-miR-3662;hsa-miR-520c-3p;hsa-miR-20a-5p;hsa-miR-573;NC_000010.11_23303;hsa-miR-512-3p;hsa-miR-373-5p;hsa-miR-302b-5p;NC_000012.12_26286;hsa-miR-3143;hsa-miR-27b-5p;NC_000003.12_7973;hsa-miR-15b-3p;NC_000006.12_15769;hsa-miR-1323;hsa-miR-372-5p;NC_000007.14_17821;hsa-miR-34c-5p
RPS6KA2	6196	hsa_circ_0076332	0.540541	1.34823e-28	20	NC_000013.11_27627;NC_000008.11_19445;hsa-miR-3662;hsa-miR-520c-3p;NC_000003.12_7520;hsa-miR-20a-5p;hsa-miR-573;NC_000010.11_23303;hsa-miR-512-3p;hsa-miR-373-5p;NC_000008.11_20037;NC_000012.12_26286;hsa-miR-3143;NC_000003.12_8583;hsa-miR-372-5p;NC_000006.12_15769;hsa-miR-1323;hsa-miR-17-5p;NC_000007.14_17821;hsa-miR-18a-3p
SMC1A	8243	hsa_circ_0038178	0.75	1.35268e-28	16	hsa-miR-27a-3p;hsa-miR-24-3p;hsa-miR-6842-3p;hsa-miR-181c-5p;NC_000002.12_3880;hsa-miR-9-5p;hsa-miR-3929;hsa-miR-4435;hsa-miR-664a-5p;NC_000017.11_32431;hsa-miR-181a-5p;hsa-miR-642a-5p;hsa-miR-22-5p;hsa-miR-6511b-5p;hsa-miR-1301-3p;hsa-miR-4443
FANCA	2175	hsa_circ_0038178	0.642857	1.35268e-28	16	hsa-miR-27a-3p;hsa-miR-24-3p;hsa-miR-6842-3p;hsa-miR-181c-5p;hsa-miR-9-5p;hsa-miR-3929;hsa-miR-4435;hsa-miR-664a-5p;NC_000012.12_26540;NC_000017.11_32431;hsa-miR-181a-5p;hsa-miR-642a-5p;hsa-miR-22-5p;hsa-miR-6511b-5p;hsa-miR-1301-3p;hsa-miR-4443
COL28A1	340267	hsa_circ_0012566	0.72	1.36608e-28	17	hsa-miR-30d-5p;hsa-miR-21-5p;hsa-miR-193a-5p;NC_000003.12_9115;hsa-miR-24-3p;NC_000011.10_23882;hsa-miR-181c-5p;hsa-miR-22-3p;hsa-miR-9-5p;hsa-miR-664a-5p;hsa-miR-203a-3p;hsa-miR-181a-5p;hsa-miR-22-5p;NC_000010.11_22861;NC_000008.11_18787;hsa-miR-6511b-5p;NC_000009.12_21531
TUBGCP3	10426	hsa_circ_0059354	0.4	1.39012e-28	16	hsa-miR-30d-5p;hsa-miR-193a-5p;NC_000024.10_38844;hsa-miR-24-3p;hsa-miR-181c-5p;hsa-miR-9-5p;hsa-miR-449c-5p;hsa-miR-3929;hsa-miR-98-5p;hsa-miR-148a-3p;NC_000017.11_32431;hsa-miR-181a-5p;hsa-miR-6511b-5p;hsa-miR-22-5p;hsa-miR-215-3p;NC_000011.10_24785
FGFR2	2263	hsa_circ_0008221	0.0721154	1.41718e-28	18	hsa-miR-193a-5p;hsa-miR-21-5p;hsa-miR-24-3p;hsa-miR-6842-3p;hsa-miR-181c-5p;hsa-miR-22-3p;hsa-miR-449c-5p;hsa-miR-3929;hsa-miR-9-5p;hsa-miR-369-3p;hsa-miR-98-5p;NC_000017.11_32431;NC_000019.10_34428;hsa-miR-181a-5p;hsa-miR-22-5p;NC_000010.11_22861;hsa-miR-6511b-5p;hsa-miR-4443
ALDH7A1	501	hsa_circ_0008221	0.0649038	1.41718e-28	18	hsa-miR-193a-5p;hsa-miR-27a-3p;hsa-miR-24-3p;hsa-miR-6842-3p;hsa-miR-181c-5p;hsa-miR-9-5p;NC_000002.12_3880;hsa-miR-3929;hsa-miR-664a-5p;hsa-miR-98-5p;NC_000017.11_32431;hsa-miR-203a-3p;hsa-miR-181a-5p;hsa-miR-22-5p;NC_000011.10_24785;NC_000020.11_34751;hsa-miR-4443;NC_000009.12_21531
DENND4A	10260	hsa_circ_0059713	0.585366	1.4676e-28	22	hsa-miR-573;hsa-miR-582-5p;hsa-miR-3529-3p;hsa-miR-34c-5p;NC_000023.11_36905;NC_000021.9_35751;hsa-miR-373-5p;NC_000009.12_21925;hsa-miR-526b-5p;NC_000002.12_3238;NC_000006.12_15769;NC_000018.10_33037;hsa-miR-3662;NC_000005.10_11919>NC_000005.10_11920;NC_000010.11_23646;NC_000016.10_31157;hsa-miR-7-5p;hsa-miR-205-5p;hsa-miR-20a-5p;NC_000011.10_25384;hsa-miR-1323;NC_000008.11_20037
CARF	79800	hsa_circ_0053716	0.418182	1.61535e-28	17	NC_000007.14_17824;NC_000019.10_34542;hsa-miR-520a-3p;NC_000002.12_3238;NC_000004.12_9958;NC_000023.11_38289;hsa-let-7c-5p;NC_000003.12_9133;NC_000010.11_23303;hsa-miR-302b-5p;NC_000009.12_20733;NC_000008.11_20037;hsa-miR-15b-3p;hsa-miR-5585-3p;hsa-miR-1323;hsa-miR-372-5p;hsa-miR-3662
MAP3K1	4214	hsa_circ_0059354	0.488889	1.66475e-28	17	hsa-miR-193a-5p;NC_000014.9_29046;hsa-miR-27a-3p;hsa-miR-24-3p;hsa-miR-6842-3p;hsa-miR-181c-5p;hsa-miR-9-5p;hsa-miR-22-3p;hsa-miR-3929;hsa-miR-98-5p;hsa-miR-4758-3p;NC_000017.11_32431;hsa-miR-181a-5p;hsa-miR-22-5p;hsa-miR-215-3p;NC_000011.10_24785;hsa-miR-4443
INCENP	3619	hsa_circ_0059354	0.622222	1.66475e-28	17	hsa-miR-30d-5p;hsa-miR-193a-5p;NC_000014.9_29046;NC_000024.10_38844;hsa-miR-24-3p;hsa-miR-6842-3p;hsa-miR-181c-5p;hsa-miR-22-3p;hsa-miR-449c-5p;hsa-miR-9-5p;NC_000002.12_3880;hsa-miR-4758-3p;hsa-miR-181a-5p;hsa-miR-22-5p;NC_000010.11_22861;hsa-miR-6511b-5p;hsa-miR-4443
RALGPS2	55103	hsa_circ_0076332	0.675676	1.71912e-28	22	hsa-miR-3143;NC_000003.12_7973;hsa-miR-15b-3p;hsa-miR-5585-3p;NC_000007.14_17821;hsa-miR-522-3p;hsa-miR-18a-3p;hsa-miR-34c-5p;hsa-miR-302a-5p;NC_000010.11_23303;hsa-miR-373-5p;NC_000006.12_15769;hsa-miR-3662;hsa-miR-520c-3p;hsa-miR-27b-5p;hsa-miR-372-5p;NC_000013.11_27627;NC_000008.11_19445;hsa-miR-20a-5p;hsa-miR-512-3p;hsa-miR-302b-5p;hsa-miR-1323
PSD3	23362	hsa_circ_0086848	0.530612	1.7548e-28	17	hsa-miR-328-3p;hsa-miR-193a-5p;hsa-miR-4443;hsa-miR-6842-3p;hsa-miR-9-5p;hsa-miR-22-3p;hsa-miR-3929;hsa-miR-4435;hsa-miR-98-5p;NC_000017.11_32431;NC_000019.10_34428;hsa-miR-203a-3p;hsa-miR-22-5p;hsa-miR-6511b-5p;NC_000010.11_22861;NC_000011.10_23882;hsa-miR-183-5p
RAD54L	8438	hsa_circ_0086848	0.44898	1.86129e-28	16	hsa-miR-24-3p;hsa-miR-659-5p;hsa-miR-6842-3p;hsa-miR-22-3p;hsa-miR-449c-5p;hsa-miR-3929;hsa-miR-4435;hsa-miR-98-5p;hsa-miR-148a-3p;NC_000017.11_32431;NC_000019.10_34428;hsa-miR-203a-3p;hsa-miR-22-5p;hsa-miR-6511b-5p;NC_000010.11_22861;hsa-miR-4443
HEG1	57493	hsa_circ_0052203	0.694444	1.87006e-28	17	NC_000014.9_29046;hsa-miR-6842-3p;hsa-miR-181c-5p;hsa-miR-22-3p;NC_000002.12_3880;hsa-miR-3929;hsa-miR-98-5p;NC_000017.11_32431;NC_000017.11_32431*;hsa-miR-6511b-5p;hsa-miR-642a-5p;hsa-miR-22-5p;NC_000011.10_24785;NC_000010.11_22289;NC_000020.11_34751;hsa-miR-4443;NC_000009.12_21531
DAB2	1601	hsa_circ_0008221	0.0552885	1.87006e-28	17	hsa-miR-328-3p;hsa-miR-499a-5p;hsa-miR-193a-5p;hsa-miR-6842-3p;hsa-miR-9-5p;hsa-miR-22-3p;hsa-miR-3929;hsa-miR-664a-5p;NC_000002.12_3880;hsa-miR-203a-3p;hsa-miR-22-5p;hsa-miR-6511b-5p;NC_000010.11_22861;NC_000011.10_23882;NC_000011.10_24785;NC_000020.11_34751;NC_000009.12_21531
RASGEF1B	153020	hsa_circ_0008221	0.0528846	1.87006e-28	17	hsa-miR-30d-5p;hsa-miR-193a-5p;NC_000014.9_29046;hsa-miR-27a-3p;NC_000003.12_9115;hsa-miR-24-3p;hsa-miR-9-5p;hsa-miR-22-3p;hsa-miR-3929;hsa-miR-664a-5p;NC_000017.11_32431;hsa-miR-203a-3p;hsa-miR-6511b-5p;NC_000011.10_23882;NC_000011.10_24785;NC_000020.11_34751;NC_000009.12_21531
ADCK3		hsa_circ_0008221	0.0625	1.87006e-28	17	hsa-miR-328-3p;hsa-miR-499a-5p;hsa-miR-193a-5p;NC_000014.9_29046;hsa-miR-659-5p;hsa-miR-6842-3p;hsa-miR-181c-5p;NC_000002.12_3880;hsa-miR-3929;hsa-miR-664a-5p;NC_000019.10_34428;hsa-miR-181a-5p;hsa-miR-6511b-5p;hsa-miR-22-5p;NC_000011.10_24785;NC_000010.11_22861;hsa-miR-4443
PPARA	5465	hsa_circ_0053716	0.636364	1.95462e-28	22	hsa-miR-15b-3p;hsa-miR-5585-3p;hsa-miR-3155a;NC_000021.9_35751;hsa-miR-7974;NC_000023.11_38289;NC_000003.12_9133;NC_000010.11_23303;NC_000018.10_33504*;NC_000002.12_3238;hsa-miR-3662;hsa-miR-520a-3p;hsa-miR-302c-5p;NC_000001.11_3101;NC_000010.11_23646;hsa-miR-92a-1-5p;NC_000007.14_17824;hsa-miR-512-3p;hsa-miR-510-5p;hsa-miR-302b-5p;hsa-miR-1323;NC_000008.11_20037
CISH	1154	hsa_circ_0038178	0.678571	2.0973e-28	15	hsa-miR-27a-3p;hsa-miR-24-3p;hsa-miR-6842-3p;hsa-miR-181c-5p;hsa-miR-9-5p;hsa-miR-3929;hsa-miR-4435;hsa-miR-664a-5p;NC_000017.11_32431;hsa-miR-181a-5p;hsa-miR-642a-5p;hsa-miR-22-5p;hsa-miR-6511b-5p;hsa-miR-1301-3p;hsa-miR-4443
GPCPD1	56261	hsa_circ_0076332	0.648649	2.69138e-28	21	hsa-miR-522-3p;NC_000013.11_27627;NC_000008.11_19445;hsa-miR-3662;hsa-miR-520c-3p;hsa-miR-20a-5p;hsa-miR-573;hsa-miR-548j-3p;hsa-miR-512-3p;hsa-miR-373-5p;NC_000006.12_15769;NC_000012.12_26286;hsa-miR-302b-5p;hsa-miR-3143;NC_000003.12_7973;hsa-miR-372-5p;hsa-miR-5585-3p;hsa-miR-1323;hsa-miR-17-5p;hsa-miR-34c-5p;hsa-miR-18a-3p
MYT1L	23040	hsa_circ_0086848	0.612245	3.04505e-28	17	hsa-miR-193a-5p;hsa-miR-24-3p;hsa-miR-659-5p;hsa-miR-6842-3p;hsa-miR-9-5p;hsa-miR-22-3p;hsa-miR-449c-5p;hsa-miR-3929;hsa-miR-4435;hsa-miR-98-5p;NC_000017.11_32431;NC_000019.10_34428;hsa-miR-203a-3p;hsa-miR-22-5p;hsa-miR-6511b-5p;NC_000010.11_22861;hsa-miR-4443
IFIT1	3434	hsa_circ_0059354	0.422222	3.23289e-28	16	hsa-miR-30d-5p;hsa-miR-193a-5p;hsa-miR-27a-3p;NC_000024.10_38844;hsa-miR-6842-3p;hsa-miR-9-5p;hsa-miR-449c-5p;hsa-miR-3929;NC_000002.12_3880;hsa-miR-4758-3p;hsa-miR-148a-3p;NC_000017.11_32431;hsa-miR-22-5p;NC_000010.11_22861;hsa-miR-215-3p;NC_000011.10_24785
SLC1A2	6506	hsa_circ_0059354	0.466667	3.23289e-28	16	hsa-miR-30d-5p;NC_000014.9_29046;hsa-miR-27a-3p;hsa-miR-24-3p;hsa-miR-22-3p;hsa-miR-449c-5p;NC_000016.10_31213;hsa-miR-3929;hsa-miR-9-5p;NC_000002.12_3880;NC_000017.11_32431;hsa-miR-98-5p;hsa-miR-148a-3p;hsa-miR-22-5p;NC_000011.10_24785;hsa-miR-4443
MYBL2	4605	hsa_circ_0008221	0.0576923	3.27362e-28	16	hsa-miR-328-3p;hsa-miR-193a-5p;NC_000014.9_29046;hsa-miR-30d-5p;NC_000003.12_9115;NC_000016.10_31515;hsa-miR-24-3p;hsa-miR-6842-3p;hsa-miR-22-3p;hsa-miR-9-5p;NC_000016.10_31213;hsa-miR-664a-5p;hsa-miR-22-5p;NC_000011.10_24785;hsa-miR-4443;NC_000009.12_21531
SLC16A6	9120	hsa_circ_0076332	0.540541	3.29223e-28	19	NC_000013.11_27627;NC_000008.11_19445;hsa-miR-3662;hsa-miR-520c-3p;NC_000003.12_7520;NC_000008.11_20037*;hsa-miR-20a-5p;NC_000010.11_23303;hsa-miR-512-3p;hsa-miR-373-5p;NC_000012.12_26286;hsa-miR-3143;NC_000003.12_7973;hsa-miR-15b-3p;NC_000006.12_15769;hsa-miR-1323;hsa-miR-372-5p;hsa-miR-17-5p;hsa-miR-34c-5p
CNTNAP2	26047	hsa_circ_0006957	0.115646	3.31936e-28	17	hsa-miR-193a-5p;NC_000014.9_29046;hsa-miR-155-5p;hsa-miR-27a-3p;hsa-miR-659-5p;hsa-miR-6807-5p;hsa-miR-9-5p;hsa-miR-449c-5p;hsa-miR-3929;NC_000016.10_31213;hsa-miR-664a-5p;NC_000012.12_26540;NC_000019.10_34428;hsa-miR-22-5p;NC_000010.11_22861;NC_000011.10_23882;NC_000011.10_24785
C11orf54	28970	hsa_circ_0076332	0.594595	3.41074e-28	20	hsa-miR-3662;hsa-miR-520c-3p;NC_000003.12_7520;hsa-miR-20a-5p;hsa-miR-573;NC_000010.11_23303;hsa-miR-512-3p;hsa-miR-373-5p;NC_000006.12_15769;NC_000012.12_26286;hsa-miR-3143;hsa-miR-27b-5p;NC_000003.12_7973;hsa-miR-372-5p;hsa-miR-5585-3p;hsa-miR-1323;NC_000007.14_17821;hsa-miR-17-5p;hsa-miR-34c-5p;hsa-miR-18a-3p
PSD3	23362	hsa_circ_0030467	0.744681	3.47036e-28	15	hsa-miR-499a-5p;hsa-miR-21-5p;hsa-miR-181c-5p;NC_000002.12_3880;hsa-miR-22-3p;NC_000011.10_23807;hsa-miR-3929;hsa-miR-4435;hsa-miR-664a-5p;hsa-miR-9-5p;hsa-miR-203a-3p;hsa-miR-22-5p;hsa-miR-6761-5p;hsa-miR-3189-3p;NC_000009.12_21531
KIF4A	24137	hsa_circ_0008221	0.0649038	3.51804e-28	18	hsa-miR-328-3p;hsa-miR-499a-5p;NC_000014.9_29046;NC_000016.10_31515;hsa-miR-6842-3p;hsa-miR-9-5p;hsa-miR-22-3p;hsa-miR-449c-5p;hsa-miR-664a-5p;NC_000002.12_3880;NC_000017.11_32431;NC_000019.10_34428;hsa-miR-22-5p;hsa-miR-6511b-5p;NC_000010.11_22861;NC_000011.10_24785;hsa-miR-4443;NC_000009.12_21531
KCNJ2	3759	hsa_circ_0008221	0.0673077	3.51804e-28	18	hsa-miR-193a-5p;hsa-miR-155-5p;NC_000016.10_31515;hsa-miR-24-3p;hsa-miR-181c-5p;hsa-miR-9-5p;hsa-miR-449c-5p;hsa-miR-22-3p;hsa-miR-3929;hsa-miR-98-5p;NC_000017.11_32431;hsa-miR-203a-3p;hsa-miR-181a-5p;hsa-miR-6511b-5p;hsa-miR-22-5p;NC_000011.10_24785;NC_000020.11_34751;hsa-miR-4443
FANCA	2175	hsa_circ_0006957	0.0748299	3.83218e-28	18	hsa-miR-30d-5p;hsa-miR-193a-5p;NC_000014.9_29046;hsa-miR-27a-3p;NC_000003.12_9115;hsa-miR-24-3p;hsa-miR-659-5p;hsa-miR-22-3p;hsa-miR-449c-5p;NC_000001.11_1021;hsa-miR-3929;hsa-miR-9-5p;hsa-miR-664a-5p;NC_000012.12_26540;NC_000019.10_34428;hsa-miR-22-5p;NC_000011.10_24785;NC_000020.11_34751
TRIM14	9830	hsa_circ_0086848	0.530612	3.83677e-28	16	hsa-miR-328-3p;hsa-miR-4443;hsa-miR-6842-3p;NC_000005.10_13790;hsa-miR-22-3p;hsa-miR-449c-5p;hsa-miR-3929;hsa-miR-9-5p;hsa-miR-4435;hsa-miR-98-5p;hsa-miR-148a-3p;NC_000019.10_34428;hsa-miR-203a-3p;hsa-miR-6511b-5p;NC_000010.11_22861;hsa-miR-183-5p
CCNF	899	hsa_circ_0086848	0.591837	3.83677e-28	16	hsa-miR-193a-5p;hsa-miR-4443;hsa-miR-24-3p;hsa-miR-6842-3p;hsa-miR-9-5p;hsa-miR-22-3p;hsa-miR-3929;hsa-miR-449c-5p;hsa-miR-4435;hsa-miR-98-5p;NC_000017.11_32431;NC_000019.10_34428;hsa-miR-148a-3p;hsa-miR-6511b-5p;hsa-miR-22-5p;hsa-miR-183-5p
BCOR	54880	hsa_circ_0086848	0.530612	3.83677e-28	16	hsa-miR-193a-5p;hsa-miR-24-3p;hsa-miR-659-5p;hsa-miR-6842-3p;NC_000005.10_13790;hsa-miR-9-5p;hsa-miR-22-3p;hsa-miR-3929;hsa-miR-369-3p;hsa-miR-98-5p;NC_000017.11_32431;NC_000019.10_34428;hsa-miR-203a-3p;hsa-miR-6511b-5p;hsa-miR-22-5p;hsa-miR-4443
AKR1C1	1645	hsa_circ_0059713	0.487805	3.92872e-28	20	NC_000006.12_16700;hsa-miR-302a-5p;NC_000009.12_21957;NC_000021.9_35751;hsa-miR-526b-5p;hsa-miR-573;NC_000016.10_31157;NC_000003.12_9133;NC_000001.11_2997;NC_000010.11_23646;NC_000022.11_36437;hsa-miR-548i;NC_000018.10_33504*;NC_000008.11_20037;hsa-miR-1323;hsa-miR-372-5p;NC_000006.12_15769;hsa-miR-205-5p;hsa-miR-3529-3p;hsa-miR-3662
C6orf141	135398	hsa_circ_0059713	0.487805	3.92872e-28	20	hsa-miR-302a-5p;NC_000023.11_36905;hsa-miR-3662;hsa-miR-526b-5p;NC_000009.12_21957;NC_000016.10_31157;NC_000003.12_9133;hsa-miR-20a-5p;NC_000010.11_23646;hsa-miR-373-5p;hsa-miR-582-5p;NC_000003.12_7276;NC_000009.12_21925;NC_000005.10_11919>NC_000005.10_11920;NC_000002.12_3238;hsa-miR-1323;NC_000018.10_33037;hsa-miR-3529-3p;hsa-miR-34c-5p;NC_000006.12_15769
TGM2	7052	hsa_circ_0038178	0.714286	3.94352e-28	15	hsa-miR-27a-3p;hsa-miR-24-3p;hsa-miR-6842-3p;hsa-miR-181c-5p;hsa-miR-9-5p;hsa-miR-3929;hsa-miR-4435;hsa-miR-664a-5p;NC_000017.11_32431;hsa-miR-181a-5p;hsa-miR-642a-5p;hsa-miR-22-5p;hsa-miR-6511b-5p;hsa-miR-1301-3p;hsa-miR-4443
PODXL	5420	hsa_circ_0012566	0.72	4.53844e-28	16	hsa-miR-21-5p;NC_000003.12_9115;NC_000016.10_31515;NW_003315954.1_39634;hsa-miR-181c-5p;hsa-miR-22-3p;hsa-miR-449c-5p;hsa-miR-9-5p;hsa-miR-664a-5p;hsa-miR-203a-3p;hsa-miR-181a-5p;hsa-miR-22-5p;NC_000010.11_22861;NC_000008.11_18787;hsa-miR-6511b-5p;NC_000009.12_21531
VSIG10L	147645	hsa_circ_0053716	0.4	4.584e-28	19	NC_000019.10_34542;hsa-miR-520a-3p;hsa-miR-3662;hsa-miR-3155a;NC_000021.9_35751;hsa-miR-7974;NC_000023.11_38289;hsa-let-7c-5p;NC_000010.11_23303;NC_000001.11_3101;hsa-miR-512-3p;hsa-miR-510-5p;NC_000018.10_33504*;hsa-miR-92a-1-5p;NC_000008.11_20037;NC_000002.12_3238;hsa-miR-1323;hsa-miR-372-5p;NC_000007.14_17821
TMEM156	80008	hsa_circ_0059713	0.536585	4.82664e-28	21	hsa-miR-92a-3p;NC_000023.11_36905;hsa-miR-3662;NC_000021.9_35751;hsa-miR-7974;hsa-miR-573;hsa-miR-526b-5p;NC_000016.10_31157;hsa-miR-20a-5p;NC_000011.10_25384;hsa-miR-373-5p;hsa-miR-548i;hsa-miR-582-5p;NC_000003.12_7276;NC_000005.10_11919>NC_000005.10_11920;NC_000002.12_3238;hsa-miR-1323;NC_000018.10_33037;hsa-miR-372-5p;hsa-miR-34c-5p;NC_000006.12_15769
ZNF425	155054	hsa_circ_0059713	0.487805	4.90516e-28	18	NC_000006.12_16700;NC_000023.11_36905;hsa-miR-302a-5p;hsa-miR-3662;hsa-miR-7974;hsa-miR-526b-5p;NC_000016.10_31157;NC_000011.10_25384;hsa-miR-373-5p;hsa-miR-548i;hsa-miR-7-5p;hsa-miR-582-5p;hsa-miR-371a-5p;NC_000009.12_21925;hsa-miR-1323;NC_000002.12_3238;hsa-miR-205-5p;hsa-miR-34c-5p
COL28A1	340267	hsa_circ_0086848	0.469388	5.19039e-28	17	hsa-miR-328-3p;hsa-miR-193a-5p;hsa-miR-4443;hsa-miR-24-3p;hsa-miR-659-5p;hsa-miR-369-3p;hsa-miR-9-5p;hsa-miR-22-3p;hsa-miR-3929;hsa-miR-4435;hsa-miR-98-5p;hsa-miR-203a-3p;hsa-miR-22-5p;hsa-miR-6511b-5p;NC_000010.11_22861;NC_000011.10_23882;hsa-miR-183-5p
NAV2	89797	hsa_circ_0038178	0.714286	5.24138e-28	16	hsa-miR-27a-3p;hsa-miR-24-3p;hsa-miR-6842-3p;hsa-miR-181c-5p;NC_000002.12_3880;hsa-miR-9-5p;hsa-miR-3929;hsa-miR-4435;hsa-miR-664a-5p;hsa-miR-5701;NC_000012.12_26540;NC_000017.11_32431;hsa-miR-181a-5p;hsa-miR-6511b-5p;hsa-miR-22-5p;hsa-miR-4443
GTSE1	51512	hsa_circ_0052203	0.527778	5.5552e-28	16	NC_000024.10_38844;hsa-miR-26b-5p;hsa-miR-6842-3p;hsa-miR-181c-5p;hsa-miR-22-3p;hsa-miR-449c-5p;hsa-miR-3929;hsa-miR-4435;hsa-miR-148a-3p;NC_000017.11_32431;NC_000017.11_32431*;hsa-miR-6511b-5p;hsa-miR-22-5p;NC_000011.10_24785;NC_000020.11_34751;NC_000009.12_21531
ZNF160	90338	hsa_circ_0076332	0.567568	5.67257e-28	19	NC_000008.11_19445;hsa-miR-520c-3p;NC_000008.11_20037*;NC_000018.10_33742;hsa-miR-573;hsa-miR-20a-5p;NC_000010.11_23303;hsa-miR-548j-3p;hsa-miR-373-5p;NC_000008.11_20037;NC_000012.12_26286;hsa-miR-3143;NC_000003.12_7973;hsa-miR-18a-3p;hsa-miR-1323;hsa-miR-372-5p;hsa-miR-17-5p;NC_000007.14_17821;hsa-miR-522-3p
MAFG	4097	hsa_circ_0053716	0.436364	5.67977e-28	20	NC_000007.14_17824;NC_000019.10_34542;hsa-miR-520a-3p;hsa-miR-3155a;NC_000004.12_9958;hsa-miR-302c-5p;hsa-let-7c-5p;NC_000003.12_9133;NC_000010.11_23303;NC_000001.11_3101;NC_000010.11_23646;hsa-miR-512-3p;hsa-miR-548i;hsa-miR-92a-1-5p;hsa-miR-510-5p;hsa-miR-302b-5p;NC_000002.12_3238;hsa-miR-1323;hsa-miR-372-5p;hsa-miR-3662
HEG1	57493	hsa_circ_0059354	0.577778	5.80091e-28	17	NC_000014.9_29046;hsa-miR-27a-3p;hsa-miR-24-3p;hsa-miR-6842-3p;hsa-miR-181c-5p;hsa-miR-9-5p;hsa-miR-22-3p;hsa-miR-3929;NC_000002.12_3880;hsa-miR-98-5p;NC_000017.11_32431;hsa-miR-181a-5p;hsa-miR-6511b-5p;hsa-miR-22-5p;hsa-miR-215-3p;NC_000011.10_24785;hsa-miR-4443
NCAPD2	9918	hsa_circ_0008221	0.0745192	5.80091e-28	17	hsa-miR-193a-5p;hsa-miR-27a-3p;NC_000016.10_31515;hsa-miR-24-3p;hsa-miR-6842-3p;hsa-miR-9-5p;hsa-miR-449c-5p;hsa-miR-3929;hsa-miR-664a-5p;hsa-miR-98-5p;NC_000017.11_32431;NC_000019.10_34428;hsa-miR-6511b-5p;hsa-miR-22-5p;NC_000020.11_34751;hsa-miR-4443;NC_000009.12_21531
ALDH5A1	7915	hsa_circ_0008221	0.0697115	5.80091e-28	17	hsa-miR-30d-5p;hsa-miR-193a-5p;hsa-miR-155-5p;hsa-miR-27a-3p;NC_000014.9_29046;NC_000003.12_9115;hsa-miR-24-3p;hsa-miR-659-5p;hsa-miR-6842-3p;hsa-miR-9-5p;hsa-miR-449c-5p;NC_000002.12_3880;hsa-miR-203a-3p;hsa-miR-22-5p;hsa-miR-6511b-5p;NC_000010.11_22861;NC_000020.11_34751
SOCS3	9021	hsa_circ_0008221	0.0625	5.80091e-28	17	hsa-miR-30d-5p;hsa-miR-193a-5p;NC_000014.9_29046;NC_000003.12_9115;hsa-miR-24-3p;hsa-miR-6842-3p;hsa-miR-22-3p;NC_000002.12_3880;hsa-miR-3929;NC_000019.10_34428;hsa-miR-203a-3p;hsa-miR-22-5p;hsa-miR-6511b-5p;NC_000010.11_22861;NC_000011.10_24785;NC_000020.11_34751;hsa-miR-4443
C19orf57	79173	hsa_circ_0008221	0.0552885	5.80091e-28	17	hsa-miR-328-3p;hsa-miR-193a-5p;NC_000014.9_29046;hsa-miR-24-3p;hsa-miR-6842-3p;hsa-miR-9-5p;hsa-miR-22-3p;hsa-miR-3929;hsa-miR-664a-5p;hsa-miR-98-5p;hsa-miR-6511b-5p;hsa-miR-22-5p;NC_000011.10_24785;NC_000010.11_22861;NC_000020.11_34751;hsa-miR-4443;NC_000009.12_21531
DNMT1	1786	hsa_circ_0008221	0.0649038	5.80091e-28	17	hsa-miR-328-3p;hsa-miR-193a-5p;hsa-miR-24-3p;hsa-miR-6842-3p;hsa-miR-181c-5p;hsa-miR-9-5p;hsa-miR-22-3p;hsa-miR-3929;NC_000002.12_3880;hsa-miR-98-5p;hsa-miR-181a-5p;hsa-miR-22-5p;NC_000016.10_31515;hsa-miR-6511b-5p;NC_000011.10_24785;NC_000020.11_34751;NC_000009.12_21531
TICRR	90381	hsa_circ_0006957	0.139456	6.61419e-28	17	hsa-miR-30d-5p;hsa-miR-193a-5p;NC_000014.9_29046;hsa-miR-27a-3p;NC_000003.12_9115;hsa-miR-24-3p;hsa-miR-6807-5p;hsa-miR-22-3p;hsa-miR-449c-5p;NC_000001.11_1021;hsa-miR-3929;hsa-miR-9-5p;hsa-miR-664a-5p;NC_000012.12_26540;hsa-miR-22-5p;NC_000011.10_23882;NC_000011.10_24785
NR3C2	4306	hsa_circ_0059713	0.536585	6.69711e-28	20	hsa-miR-92a-3p;NC_000023.11_36905;hsa-miR-3662;hsa-miR-7974;hsa-miR-526b-5p;NC_000016.10_31157;NC_000003.12_9133;NC_000001.11_2997;NC_000010.11_23646;NC_000022.11_36437;hsa-miR-548i;NC_000009.12_21925;NC_000005.10_11919>NC_000005.10_11920;hsa-miR-1323;NC_000002.12_3238;hsa-miR-205-5p;NC_000018.10_33037;hsa-miR-372-5p;hsa-miR-34c-5p;NC_000006.12_15769
LAMB3	3914	hsa_circ_0059713	0.536585	6.69711e-28	20	NC_000006.12_16700;hsa-miR-302a-5p;hsa-miR-3662;NC_000021.9_35751;hsa-miR-7974;hsa-miR-573;hsa-miR-526b-5p;NC_000009.12_21957;NC_000001.11_2997;NC_000016.10_31157;NC_000011.10_25384;NC_000008.11_20037;hsa-miR-371a-5p;NC_000009.12_21925;NC_000002.12_3238;NC_000022.11_36437;NC_000005.10_11919>NC_000005.10_11920;hsa-miR-372-5p;hsa-miR-34c-5p;NC_000006.12_15769
TNFSF15	9966	hsa_circ_0059713	0.634146	6.97406e-28	22	hsa-miR-573;hsa-miR-34c-5p;NC_000023.11_36905;hsa-miR-7974;hsa-miR-373-5p;NC_000018.10_33504*;NC_000009.12_21925;hsa-miR-526b-5p;NC_000002.12_3238;NC_000006.12_15769;hsa-miR-3662;hsa-miR-92a-3p;NC_000010.11_23646;NC_000016.10_31157;hsa-miR-7-5p;NC_000022.11_36437;hsa-miR-372-5p;hsa-miR-20a-5p;NC_000011.10_25384;hsa-miR-371a-5p;hsa-miR-1323;NC_000008.11_20037
PPARGC1A	10891	hsa_circ_0059354	0.511111	7.18797e-28	16	hsa-miR-30d-5p;hsa-miR-193a-5p;NC_000024.10_38844;hsa-miR-24-3p;hsa-miR-6842-3p;hsa-miR-22-3p;hsa-miR-9-5p;hsa-miR-3929;NC_000016.10_31213;NC_000002.12_3880;hsa-miR-98-5p;NC_000017.11_32431;hsa-miR-22-5p;NC_000010.11_22861;NC_000011.10_24785;hsa-miR-4443
ALDH7A1	501	hsa_circ_0059354	0.422222	7.18797e-28	16	hsa-miR-193a-5p;hsa-miR-27a-3p;hsa-miR-24-3p;hsa-miR-6842-3p;hsa-miR-181c-5p;hsa-miR-9-5p;NC_000002.12_3880;hsa-miR-3929;hsa-miR-98-5p;hsa-miR-148a-3p;NC_000017.11_32431;hsa-miR-181a-5p;hsa-miR-22-5p;hsa-miR-215-3p;NC_000011.10_24785;hsa-miR-4443
TGM2	7052	hsa_circ_0086848	0.469388	7.65377e-28	16	hsa-miR-328-3p;hsa-miR-4443;hsa-miR-24-3p;hsa-miR-659-5p;hsa-miR-6842-3p;hsa-miR-9-5p;hsa-miR-449c-5p;hsa-miR-3929;hsa-miR-4435;hsa-miR-98-5p;NC_000017.11_32431;hsa-miR-203a-3p;hsa-miR-22-5p;hsa-miR-6511b-5p;NC_000010.11_22861;hsa-miR-183-5p
DIAPH3	81624	hsa_circ_0086848	0.44898	7.65377e-28	16	hsa-miR-328-3p;hsa-miR-4443;hsa-miR-659-5p;hsa-miR-6842-3p;hsa-miR-369-3p;hsa-miR-9-5p;hsa-miR-22-3p;hsa-miR-3929;hsa-miR-4435;hsa-miR-98-5p;NC_000017.11_32431;hsa-miR-203a-3p;hsa-miR-22-5p;hsa-miR-6511b-5p;NC_000010.11_22861;hsa-miR-183-5p
PBX1	5087	hsa_circ_0086848	0.44898	7.65377e-28	16	hsa-miR-328-3p;hsa-miR-193a-5p;hsa-miR-4443;hsa-miR-24-3p;NC_000005.10_13790;hsa-miR-9-5p;hsa-miR-22-3p;hsa-miR-3929;hsa-miR-98-5p;NC_000017.11_32431;hsa-miR-203a-3p;hsa-miR-22-5p;hsa-miR-6511b-5p;NC_000010.11_22861;NC_000011.10_23882;hsa-miR-183-5p
GPCPD1	56261	hsa_circ_0053716	0.472727	7.70093e-28	21	NC_000007.14_17824;hsa-miR-520a-3p;hsa-miR-92a-3p;NC_000002.12_3238;hsa-miR-7974;NC_000023.11_38289;hsa-miR-302c-5p;NC_000003.12_9133;hsa-let-7c-5p;NC_000001.11_3101;hsa-miR-512-3p;hsa-miR-548i;NC_000018.10_33504*;NC_000009.12_20733;hsa-miR-510-5p;hsa-miR-302b-5p;hsa-miR-372-5p;hsa-miR-5585-3p;hsa-miR-1323;hsa-miR-3529-3p;hsa-miR-3662
PDE4D	5144	hsa_circ_0012566	0.76	8.55366e-28	16	hsa-miR-30d-5p;hsa-miR-21-5p;hsa-miR-499a-5p;hsa-miR-193a-5p;NC_000003.12_9115;NW_003315954.1_39634;hsa-miR-24-3p;hsa-miR-181c-5p;hsa-miR-22-3p;hsa-miR-9-5p;hsa-miR-203a-3p;hsa-miR-181a-5p;hsa-miR-6511b-5p;hsa-miR-22-5p;NC_000008.11_18787;NC_000011.10_23882
FANCA	2175	hsa_circ_0086848	0.530612	8.70047e-28	17	hsa-miR-328-3p;hsa-miR-193a-5p;hsa-miR-24-3p;hsa-miR-659-5p;hsa-miR-6842-3p;hsa-miR-9-5p;hsa-miR-22-3p;hsa-miR-449c-5p;hsa-miR-3929;hsa-miR-4435;hsa-miR-148a-3p;NC_000017.11_32431;NC_000019.10_34428;hsa-miR-203a-3p;hsa-miR-6511b-5p;hsa-miR-22-5p;hsa-miR-4443
COL28A1	340267	hsa_circ_0030467	0.638298	8.74954e-28	15	hsa-miR-21-5p;NC_000011.10_23807;hsa-miR-181c-5p;NC_000002.12_3880;hsa-miR-22-3p;hsa-miR-3929;hsa-miR-4435;hsa-miR-664a-5p;hsa-miR-9-5p;hsa-miR-203a-3p;NC_000023.11_37419;hsa-miR-22-5p;hsa-miR-6761-5p;hsa-miR-3189-3p;NC_000009.12_21531
FXN	2395	hsa_circ_0006957	0.112245	8.79997e-28	16	hsa-miR-193a-5p;hsa-miR-21-5p;NC_000014.9_29046;hsa-miR-24-3p;hsa-miR-659-5p;hsa-miR-6807-5p;hsa-miR-9-5p;hsa-miR-449c-5p;hsa-miR-3929;NC_000016.10_31213;hsa-miR-664a-5p;hsa-miR-5701;NC_000012.12_26540;NC_000010.11_22861;NC_000011.10_24785;NC_000020.11_34751
FGD3	89846	hsa_circ_0008221	0.0625	9.12095e-28	14	hsa-miR-328-3p;NC_000014.9_29046;hsa-miR-27a-3p;hsa-miR-24-3p;hsa-miR-659-5p;hsa-miR-6842-3p;hsa-miR-22-3p;hsa-miR-449c-5p;hsa-miR-3929;hsa-miR-6511b-5p;NC_000016.10_31515;NC_000011.10_24785;hsa-miR-4443;NC_000009.12_21531
CRTC1	23373	hsa_circ_0008221	0.0817308	9.12095e-28	14	hsa-miR-193a-5p;NC_000014.9_29046;hsa-miR-27a-3p;hsa-miR-24-3p;hsa-miR-22-3p;hsa-miR-3929;hsa-miR-664a-5p;NC_000017.11_32431;NC_000019.10_34428;hsa-miR-203a-3p;hsa-miR-6511b-5p;NC_000011.10_23882;NC_000011.10_24785;hsa-miR-4443
DPYS	1807	hsa_circ_0008221	0.0504808	9.12095e-28	14	hsa-miR-21-5p;hsa-miR-155-5p;NC_000003.12_9115;hsa-miR-27a-3p;hsa-miR-215-5p;hsa-miR-181c-5p;hsa-miR-369-3p;NC_000016.10_31213;hsa-miR-3929;hsa-miR-664a-5p;NC_000017.11_32431;NC_000019.10_34428;hsa-miR-22-5p;hsa-miR-4443
NCOA7	135112	hsa_circ_0059713	0.585366	1.01204e-27	22	hsa-miR-573;hsa-miR-3529-3p;NC_000006.12_16700;hsa-miR-302a-5p;NC_000023.11_36905;NC_000003.12_9133;NC_000018.10_33504*;hsa-miR-526b-5p;NC_000002.12_3238;NC_000006.12_15769;NC_000018.10_33037;hsa-miR-3662;NC_000010.11_23646;NC_000016.10_31157;hsa-miR-7-5p;NC_000022.11_36437;hsa-miR-372-5p;hsa-miR-20a-5p;NC_000011.10_25384;hsa-miR-371a-5p;hsa-miR-1323;NC_000008.11_20037
MTMR9	66036	hsa_circ_0059713	0.585366	1.01204e-27	22	hsa-miR-582-5p;hsa-miR-3529-3p;hsa-miR-34c-5p;NC_000006.12_16700;NC_000023.11_36905;NC_000021.9_35751;hsa-miR-7974;hsa-miR-373-5p;NC_000009.12_21925;hsa-miR-526b-5p;NC_000018.10_33037;hsa-miR-3662;NC_000009.12_21957;NC_000010.11_23646;NC_000016.10_31157;hsa-miR-7-5p;hsa-miR-205-5p;hsa-miR-372-5p;hsa-miR-20a-5p;NC_000011.10_25384;NC_000003.12_7276;hsa-miR-1323
FILIP1L	11259	hsa_circ_0008221	0.0456731	1.0907e-27	15	hsa-miR-328-3p;hsa-miR-155-5p;hsa-miR-27a-3p;hsa-miR-6842-3p;hsa-miR-9-5p;hsa-miR-664a-5p;NC_000017.11_32431;hsa-miR-203a-3p;hsa-miR-6511b-5p;NC_000004.12_10963;NC_000016.10_31515;NC_000011.10_23882;NC_000011.10_24785;hsa-miR-4443;NC_000009.12_21531
TGFBI	7045	hsa_circ_0008221	0.0480769	1.0907e-27	15	hsa-miR-193a-5p;hsa-miR-21-5p;NC_000014.9_29046;hsa-miR-155-5p;hsa-miR-27a-3p;hsa-miR-659-5p;hsa-miR-6842-3p;hsa-miR-181c-5p;NC_000002.12_3880;hsa-miR-22-3p;hsa-miR-9-5p;hsa-miR-181a-5p;hsa-miR-6511b-5p;NC_000011.10_24785;hsa-miR-4443
SLC45A4	57210	hsa_circ_0053716	0.490909	1.12477e-27	21	hsa-miR-520a-3p;hsa-miR-92a-3p;NC_000002.12_3238;hsa-miR-3662;hsa-miR-3155a;NC_000004.12_9958;NC_000023.11_38289;hsa-miR-7974;hsa-miR-302c-5p;hsa-let-7c-5p;NC_000001.11_3101;hsa-miR-512-3p;hsa-miR-548i;NC_000018.10_33504*;hsa-miR-92a-1-5p;hsa-miR-510-5p;NC_000008.11_20037;hsa-miR-15b-3p;hsa-miR-5585-3p;hsa-miR-3529-3p;NC_000007.14_17821
MXD1	4084	hsa_circ_0053716	0.509091	1.12477e-27	21	hsa-miR-520a-3p;hsa-miR-92a-3p;NC_000002.12_3238;hsa-miR-3662;hsa-miR-3155a;hsa-miR-7974;hsa-miR-302c-5p;hsa-let-7c-5p;NC_000003.12_9133;NC_000010.11_23303;NC_000001.11_3101;NC_000010.11_23646;hsa-miR-512-3p;hsa-miR-510-5p;NC_000018.10_33504*;NC_000009.12_20733;hsa-miR-92a-1-5p;hsa-miR-15b-3p;hsa-miR-5585-3p;hsa-miR-3529-3p;NC_000007.14_17821
MID1	4281	hsa_circ_0052203	0.555556	1.1447e-27	16	NC_000014.9_29046;NC_000024.10_38844;hsa-miR-6842-3p;hsa-miR-22-3p;NC_000002.12_3880;hsa-miR-3929;hsa-miR-4435;hsa-miR-98-5p;NC_000017.11_32431;NC_000017.11_32431*;hsa-miR-6511b-5p;hsa-miR-22-5p;NC_000011.10_24785;NC_000010.11_22289;NC_000020.11_34751;NC_000009.12_21531
WDR62	284403	hsa_circ_0052203	0.611111	1.1447e-27	16	NC_000014.9_29046;hsa-miR-6842-3p;NC_000002.12_3880;hsa-miR-449c-5p;hsa-miR-98-5p;hsa-miR-4435;NC_000017.11_32431;NC_000017.11_32431*;hsa-miR-6511b-5p;hsa-miR-22-5p;NC_000011.10_24785;NC_000010.11_22289;NC_000010.11_22861;NC_000020.11_34751;hsa-miR-4443;NC_000009.12_21531
NCAPD3	23310	hsa_circ_0052203	0.555556	1.1447e-27	16	NC_000024.10_38844;hsa-miR-6842-3p;hsa-miR-181c-5p;hsa-miR-22-3p;hsa-miR-449c-5p;hsa-miR-3929;hsa-miR-4435;NC_000002.12_3880;hsa-miR-98-5p;NC_000017.11_32431;hsa-miR-148a-3p;hsa-miR-6511b-5p;hsa-miR-22-5p;NC_000011.10_24785;NC_000010.11_22861;NC_000009.12_21531
E2F2	1870	hsa_circ_0052203	0.583333	1.1447e-27	16	NC_000014.9_29046;hsa-miR-6842-3p;hsa-miR-6807-5p;hsa-miR-22-3p;NC_000002.12_3880;hsa-miR-3929;hsa-miR-4435;hsa-miR-98-5p;hsa-miR-148a-3p;hsa-miR-6511b-5p;hsa-miR-642a-5p;hsa-miR-22-5p;NC_000011.10_24785;NC_000020.11_34751;hsa-miR-4443;NC_000009.12_21531
KIF21B	23046	hsa_circ_0059713	0.585366	1.16237e-27	21	NC_000006.12_16700;NC_000023.11_36905;hsa-miR-3662;NC_000021.9_35751;hsa-miR-7974;hsa-miR-573;hsa-miR-526b-5p;NC_000009.12_21957;hsa-miR-20a-5p;hsa-miR-548i;hsa-miR-7-5p;NC_000003.12_7276;NC_000009.12_21925;NC_000005.10_11919>NC_000005.10_11920;hsa-miR-1323;NC_000002.12_3238;NC_000022.11_36437;NC_000018.10_33037;hsa-miR-372-5p;hsa-miR-34c-5p;NC_000006.12_15769
TMEM156	80008	hsa_circ_0076332	0.621622	1.26855e-27	20	NC_000013.11_27627;hsa-miR-3662;hsa-miR-520c-3p;NC_000008.11_20037*;hsa-miR-20a-5p;hsa-miR-573;hsa-miR-18a-3p;hsa-miR-512-3p;hsa-miR-373-5p;NC_000006.12_15769;NC_000012.12_26286;hsa-miR-3143;hsa-miR-27b-5p;hsa-miR-15b-3p;hsa-miR-5585-3p;hsa-miR-1323;hsa-miR-372-5p;hsa-miR-17-5p;NC_000007.14_17821;hsa-miR-34c-5p
CLSPN	63967	hsa_circ_0038178	0.678571	1.29091e-27	15	hsa-miR-27a-3p;hsa-miR-24-3p;hsa-miR-6842-3p;hsa-miR-181c-5p;NC_000002.12_3880;hsa-miR-9-5p;hsa-miR-3929;hsa-miR-4435;hsa-miR-664a-5p;NC_000017.11_32431;hsa-miR-181a-5p;hsa-miR-642a-5p;hsa-miR-22-5p;hsa-miR-6511b-5p;hsa-miR-4443
STIL	6491	hsa_circ_0059354	0.377778	1.35472e-27	15	hsa-miR-30d-5p;hsa-miR-193a-5p;hsa-miR-27a-3p;hsa-miR-24-3p;hsa-miR-6842-3p;hsa-miR-9-5p;hsa-miR-3929;hsa-miR-98-5p;hsa-miR-4758-3p;NC_000017.11_32431;hsa-miR-6511b-5p;hsa-miR-22-5p;hsa-miR-215-3p;NC_000011.10_24785;NC_000010.11_22861
SETMAR	6419	hsa_circ_0059354	0.444444	1.35472e-27	15	hsa-miR-30d-5p;hsa-miR-193a-5p;NC_000014.9_29046;hsa-miR-27a-3p;hsa-miR-24-3p;hsa-miR-181c-5p;hsa-miR-22-3p;hsa-miR-449c-5p;NC_000016.10_31213;hsa-miR-9-5p;NC_000002.12_3880;hsa-miR-98-5p;hsa-miR-181a-5p;hsa-miR-6511b-5p;hsa-miR-22-5p
MATN2	4147	hsa_circ_0086848	0.408163	1.35472e-27	15	hsa-miR-328-3p;hsa-miR-193a-5p;hsa-miR-24-3p;hsa-miR-659-5p;NC_000005.10_13790;hsa-miR-22-3p;hsa-miR-449c-5p;hsa-miR-3929;hsa-miR-4435;hsa-miR-98-5p;NC_000017.11_32431;hsa-miR-22-5p;hsa-miR-6511b-5p;NC_000010.11_22861;hsa-miR-183-5p
C19orf57	79173	hsa_circ_0086848	0.367347	1.35472e-27	15	hsa-miR-328-3p;hsa-miR-193a-5p;hsa-miR-4443;hsa-miR-24-3p;hsa-miR-6842-3p;NC_000005.10_13790;hsa-miR-9-5p;hsa-miR-22-3p;hsa-miR-3929;hsa-miR-4435;hsa-miR-98-5p;hsa-miR-22-5p;hsa-miR-6511b-5p;NC_000010.11_22861;hsa-miR-183-5p
TRANK1	9881	hsa_circ_0030467	0.702128	1.37493e-27	14	hsa-miR-499a-5p;hsa-miR-181c-5p;NC_000002.12_3880;hsa-miR-22-3p;hsa-miR-3929;NC_000011.10_23807;hsa-miR-4435;hsa-miR-664a-5p;hsa-miR-9-5p;hsa-miR-203a-3p;NC_000023.11_37419;hsa-miR-22-5p;hsa-miR-6761-5p;NC_000009.12_21531
HIVEP2	3097	hsa_circ_0059713	0.609756	1.45919e-27	22	hsa-miR-573;hsa-miR-582-5p;hsa-miR-34c-5p;NC_000006.12_16700;NC_000023.11_36905;NC_000021.9_35751;hsa-miR-7974;hsa-miR-373-5p;NC_000009.12_21925;hsa-miR-526b-5p;NC_000002.12_3238;NC_000006.12_15769;NC_000018.10_33037;hsa-miR-3662;NC_000016.10_31157;NC_000022.11_36437;hsa-miR-7-5p;hsa-miR-205-5p;hsa-miR-372-5p;hsa-miR-20a-5p;NC_000011.10_25384;NC_000003.12_7276
HIPK2	28996	hsa_circ_0045194	1	1.47093e-27	18	NC_000012.12_25887;NC_000020.11_35116;hsa-miR-3155a;hsa-miR-26a-1-3p;NC_000003.12_9133;NC_000022.11_36437;hsa-miR-510-5p;hsa-miR-302b-5p;NC_000005.10_14158;hsa-miR-7-5p;hsa-miR-3143;hsa-miR-367-3p;hsa-miR-92a-1-5p;hsa-miR-526b-5p;hsa-miR-205-5p;NC_000007.14_17821;hsa-miR-3662;NC_000006.12_15769
MSH2	4436	hsa_circ_0086848	0.428571	1.4819e-27	16	hsa-miR-328-3p;hsa-miR-193a-5p;hsa-miR-4443;hsa-miR-24-3p;hsa-miR-659-5p;hsa-miR-6842-3p;NC_000005.10_13790;hsa-miR-9-5p;hsa-miR-3929;hsa-miR-4435;hsa-miR-98-5p;NC_000017.11_32431;hsa-miR-203a-3p;hsa-miR-6511b-5p;hsa-miR-22-5p;hsa-miR-183-5p
ROR1	4919	hsa_circ_0059354	0.488889	1.53518e-27	16	hsa-miR-30d-5p;NC_000014.9_29046;hsa-miR-27a-3p;NC_000024.10_38844;hsa-miR-6842-3p;hsa-miR-181c-5p;hsa-miR-22-3p;hsa-miR-9-5p;hsa-miR-3929;NC_000002.12_3880;hsa-miR-98-5p;hsa-miR-181a-5p;hsa-miR-22-5p;NC_000010.11_22861;NC_000011.10_24785;hsa-miR-4443
PLEKHA6	22874	hsa_circ_0012566	0.76	1.56226e-27	17	hsa-miR-30d-5p;hsa-miR-21-5p;hsa-miR-193a-5p;NC_000016.10_31515;NW_003315954.1_39634;hsa-miR-24-3p;hsa-miR-181c-5p;hsa-miR-22-3p;hsa-miR-9-5p;hsa-miR-664a-5p;hsa-miR-203a-3p;hsa-miR-181a-5p;hsa-miR-22-5p;NC_000010.11_22861;NC_000008.11_18787;hsa-miR-6511b-5p;NC_000009.12_21531
INCENP	3619	hsa_circ_0012566	0.72	1.57219e-27	16	hsa-miR-30d-5p;hsa-miR-499a-5p;hsa-miR-193a-5p;NC_000003.12_9115;hsa-miR-24-3p;hsa-miR-181c-5p;hsa-miR-22-3p;hsa-miR-449c-5p;hsa-miR-9-5p;hsa-miR-203a-3p;hsa-miR-181a-5p;hsa-miR-22-5p;NC_000010.11_22861;hsa-miR-6511b-5p;NC_000011.10_23882;NC_000009.12_21531
FBXO32	114907	hsa_circ_0059713	0.536585	1.77883e-27	21	NC_000006.12_16700;hsa-miR-302a-5p;hsa-miR-3662;hsa-miR-7974;hsa-miR-573;hsa-miR-526b-5p;NC_000003.12_9133;NC_000016.10_31157;hsa-miR-20a-5p;NC_000011.10_25384;hsa-miR-373-5p;NC_000008.11_20037;hsa-miR-582-5p;NC_000009.12_21925;hsa-miR-1323;hsa-miR-372-5p;NC_000006.12_15769;hsa-miR-7-5p;NC_000018.10_33037;hsa-miR-3529-3p;hsa-miR-34c-5p
PHLDA1	22822	hsa_circ_0059713	0.536585	1.77883e-27	21	hsa-miR-92a-3p;hsa-miR-3662;hsa-miR-7974;hsa-miR-573;hsa-miR-526b-5p;NC_000011.10_25384;NC_000010.11_23646;hsa-miR-373-5p;hsa-miR-548i;NC_000018.10_33504*;hsa-miR-582-5p;NC_000003.12_7276;NC_000009.12_21925;hsa-miR-1323;hsa-miR-372-5p;NC_000002.12_3238;NC_000022.11_36437;NC_000018.10_33037;hsa-miR-3529-3p;NC_000005.10_11919>NC_000005.10_11920;NC_000006.12_15769
SEL1L3	23231	hsa_circ_0059713	0.512195	1.86483e-27	20	hsa-miR-92a-3p;NC_000023.11_36905;hsa-miR-526b-5p;NC_000011.10_25384;NC_000003.12_9133;NC_000001.11_2997;NC_000010.11_23646;NC_000022.11_36437;hsa-miR-548i;NC_000018.10_33504*;hsa-miR-582-5p;hsa-miR-7-5p;NC_000003.12_7276;hsa-miR-371a-5p;NC_000009.12_21925;NC_000002.12_3238;hsa-miR-205-5p;hsa-miR-372-5p;hsa-miR-3662;NC_000006.12_15769
PRDM1	639	hsa_circ_0059713	0.512195	1.86483e-27	20	NC_000023.11_36905;hsa-miR-3662;NC_000021.9_35751;hsa-miR-526b-5p;hsa-miR-573;NC_000016.10_31157;NC_000003.12_9133;hsa-miR-20a-5p;NC_000011.10_25384;hsa-miR-373-5p;hsa-miR-7-5p;hsa-miR-582-5p;NC_000008.11_20037;NC_000009.12_21925;hsa-miR-372-5p;NC_000006.12_15769;hsa-miR-205-5p;NC_000005.10_11919>NC_000005.10_11920;hsa-miR-3529-3p;hsa-miR-34c-5p
TDP1	55775	hsa_circ_0008221	0.0697115	1.89064e-27	18	hsa-miR-328-3p;hsa-miR-499a-5p;hsa-miR-21-5p;hsa-miR-27a-3p;hsa-miR-215-5p;hsa-miR-24-3p;hsa-miR-181c-5p;hsa-miR-22-3p;NC_000002.12_3880;hsa-miR-98-5p;NC_000017.11_32431;hsa-miR-203a-3p;hsa-miR-181a-5p;hsa-miR-22-5p;NC_000010.11_22861;NC_000011.10_24785;hsa-miR-4443;NC_000009.12_21531
USP2	9099	hsa_circ_0006957	0.0884354	2.0084e-27	14	hsa-miR-193a-5p;hsa-miR-30d-5p;hsa-miR-27a-3p;NC_000003.12_9115;hsa-miR-24-3p;hsa-miR-659-5p;hsa-miR-22-3p;hsa-miR-449c-5p;NC_000016.10_31213;hsa-miR-3929;hsa-miR-9-5p;hsa-miR-5701;NC_000016.10_31515;NC_000011.10_24785
AUTS2	26053	hsa_circ_0076332	0.675676	2.07829e-27	22	NC_000003.12_7520;hsa-miR-573;NC_000003.12_8583;hsa-miR-15b-3p;hsa-miR-5585-3p;NC_000007.14_17821;hsa-miR-34c-5p;hsa-miR-18a-3p;hsa-miR-302a-5p;NC_000010.11_23303;hsa-miR-373-5p;NC_000012.12_26286;NC_000006.12_15769;hsa-miR-3662;hsa-miR-27b-5p;hsa-miR-372-5p;NC_000013.11_27627;hsa-miR-20a-5p;hsa-miR-512-3p;hsa-miR-302b-5p;hsa-miR-1323;NC_000008.11_20037
FIGNL1	63979	hsa_circ_0052203	0.638889	2.28266e-27	16	NC_000024.10_38844;hsa-miR-6842-3p;hsa-miR-181c-5p;hsa-miR-22-3p;hsa-miR-449c-5p;hsa-miR-3929;NC_000002.12_3880;hsa-miR-98-5p;NC_000017.11_32431;hsa-miR-6511b-5p;hsa-miR-22-5p;NC_000011.10_24785;NC_000010.11_22289;NC_000020.11_34751;hsa-miR-4443;NC_000009.12_21531
IGFBP5	3488	hsa_circ_0052203	0.611111	2.28266e-27	16	NC_000014.9_29046;hsa-miR-6842-3p;hsa-miR-6807-5p;hsa-miR-22-3p;hsa-miR-449c-5p;hsa-miR-3929;hsa-miR-4435;hsa-miR-98-5p;hsa-miR-148a-3p;hsa-miR-6511b-5p;hsa-miR-642a-5p;hsa-miR-22-5p;NC_000011.10_24785;NC_000010.11_22861;hsa-miR-4443;NC_000009.12_21531
XIAP	331	hsa_circ_0053716	0.490909	2.35057e-27	21	hsa-miR-520a-3p;NC_000002.12_3238;hsa-miR-3662;hsa-miR-3155a;NC_000021.9_35751;hsa-miR-7974;hsa-miR-302c-5p;hsa-let-7c-5p;NC_000003.12_9133;NC_000010.11_23303;NC_000001.11_3101;NC_000010.11_23646;hsa-miR-512-3p;hsa-miR-510-5p;NC_000018.10_33504*;hsa-miR-15b-3p;hsa-miR-5585-3p;hsa-miR-1323;hsa-miR-372-5p;hsa-miR-3529-3p;NC_000007.14_17821
HIVEP2	3097	hsa_circ_0076332	0.621622	2.37114e-27	21	hsa-miR-522-3p;NC_000013.11_27627;NC_000008.11_19445;hsa-miR-34c-5p;hsa-miR-3662;hsa-miR-520c-3p;NC_000008.11_20037*;hsa-miR-573;hsa-miR-20a-5p;NC_000010.11_23303;hsa-miR-512-3p;hsa-miR-373-5p;NC_000012.12_26286;hsa-miR-27b-5p;NC_000003.12_8583;hsa-miR-15b-3p;NC_000006.12_15769;hsa-miR-372-5p;hsa-miR-17-5p;NC_000007.14_17821;hsa-miR-18a-3p
CNTRL	11064	hsa_circ_0012566	0.72	2.50228e-27	15	hsa-miR-499a-5p;hsa-miR-21-5p;hsa-miR-193a-5p;hsa-miR-24-3p;hsa-miR-181c-5p;hsa-miR-22-3p;hsa-miR-9-5p;NC_000016.10_31213;hsa-miR-203a-3p;hsa-miR-181a-5p;hsa-miR-22-5p;NC_000010.11_22861;hsa-miR-6511b-5p;NC_000011.10_23882;NC_000009.12_21531
TLDC1	57707	hsa_circ_0059713	0.560976	2.69839e-27	21	hsa-miR-302a-5p;hsa-miR-7974;hsa-miR-526b-5p;NC_000016.10_31157;NC_000001.11_2997;hsa-miR-20a-5p;NC_000010.11_23646;NC_000011.10_25384;hsa-miR-373-5p;hsa-miR-548i;NC_000018.10_33504*;hsa-miR-582-5p;hsa-miR-7-5p;hsa-miR-371a-5p;NC_000009.12_21925;hsa-miR-1323;NC_000002.12_3238;NC_000022.11_36437;NC_000018.10_33037;NC_000005.10_11919>NC_000005.10_11920;NC_000006.12_15769
CIT	11113	hsa_circ_0086848	0.632653	2.79194e-27	16	hsa-miR-193a-5p;hsa-miR-4443;hsa-miR-24-3p;hsa-miR-6842-3p;hsa-miR-369-3p;hsa-miR-9-5p;hsa-miR-22-3p;hsa-miR-98-5p;hsa-miR-4435;NC_000019.10_34428;hsa-miR-203a-3p;hsa-miR-22-5p;hsa-miR-6511b-5p;NC_000010.11_22861;NC_000011.10_23882;hsa-miR-183-5p
PDE4D	5144	hsa_circ_0086848	0.44898	2.79194e-27	16	hsa-miR-328-3p;hsa-miR-193a-5p;hsa-miR-4443;hsa-miR-24-3p;hsa-miR-6842-3p;NC_000005.10_13790;hsa-miR-9-5p;hsa-miR-22-3p;hsa-miR-3929;hsa-miR-4435;NC_000017.11_32431;hsa-miR-203a-3p;hsa-miR-6511b-5p;hsa-miR-22-5p;NC_000011.10_23882;hsa-miR-183-5p
CLSPN	63967	hsa_circ_0086848	0.55102	2.79194e-27	16	hsa-miR-193a-5p;hsa-miR-24-3p;hsa-miR-6842-3p;hsa-miR-369-3p;hsa-miR-9-5p;hsa-miR-22-3p;hsa-miR-3929;hsa-miR-4435;hsa-miR-98-5p;NC_000017.11_32431;hsa-miR-203a-3p;hsa-miR-6511b-5p;hsa-miR-22-5p;NC_000011.10_23882;NC_000010.11_22861;hsa-miR-4443
MKI67	4288	hsa_circ_0012566	0.76	2.82369e-27	16	hsa-miR-193a-5p;hsa-miR-21-5p;NC_000016.10_31515;NW_003315954.1_39634;hsa-miR-24-3p;hsa-miR-181c-5p;hsa-miR-22-3p;hsa-miR-449c-5p;hsa-miR-9-5p;hsa-miR-203a-3p;hsa-miR-181a-5p;hsa-miR-22-5p;NC_000010.11_22861;NC_000008.11_18787;hsa-miR-6511b-5p;NC_000009.12_21531
PDLIM5	10611	hsa_circ_0076332	0.648649	2.90495e-27	20	hsa-miR-522-3p;NC_000013.11_27627;NC_000008.11_19445;hsa-miR-302a-5p;hsa-miR-3662;NC_000003.12_7520;hsa-miR-520c-3p;hsa-miR-573;hsa-miR-20a-5p;hsa-miR-512-3p;NC_000006.12_15769;NC_000012.12_26286;hsa-miR-27b-5p;NC_000003.12_8583;hsa-miR-372-5p;hsa-miR-5585-3p;hsa-miR-1323;hsa-miR-17-5p;NC_000007.14_17821;hsa-miR-34c-5p
SLC35A3	23443	hsa_circ_0059713	0.487805	2.92843e-27	19	NC_000006.12_16700;hsa-miR-302a-5p;NC_000023.11_36905;NC_000009.12_21957;hsa-miR-7974;hsa-miR-573;hsa-miR-526b-5p;NC_000003.12_9133;NC_000016.10_31157;NC_000010.11_23646;NC_000022.11_36437;hsa-miR-20a-5p;hsa-miR-548i;hsa-miR-371a-5p;NC_000006.12_15769;hsa-miR-205-5p;NC_000018.10_33037;hsa-miR-3529-3p;hsa-miR-3662
E2F2	1870	hsa_circ_0059354	0.466667	3.16221e-27	16	hsa-miR-193a-5p;NC_000014.9_29046;hsa-miR-27a-3p;hsa-miR-24-3p;hsa-miR-6842-3p;hsa-miR-9-5p;hsa-miR-22-3p;hsa-miR-3929;NC_000002.12_3880;hsa-miR-98-5p;hsa-miR-148a-3p;hsa-miR-22-5p;hsa-miR-6511b-5p;hsa-miR-215-3p;NC_000011.10_24785;hsa-miR-4443
MID1	4281	hsa_circ_0059354	0.466667	3.16221e-27	16	hsa-miR-193a-5p;NC_000014.9_29046;hsa-miR-27a-3p;NC_000024.10_38844;hsa-miR-24-3p;hsa-miR-6842-3p;hsa-miR-9-5p;hsa-miR-22-3p;hsa-miR-3929;NC_000002.12_3880;hsa-miR-98-5p;NC_000017.11_32431;hsa-miR-6511b-5p;hsa-miR-22-5p;hsa-miR-215-3p;NC_000011.10_24785
TRMT5	57570	hsa_circ_0059354	0.377778	3.16221e-27	16	hsa-miR-30d-5p;hsa-miR-193a-5p;hsa-miR-27a-3p;NC_000024.10_38844;hsa-miR-24-3p;hsa-miR-6842-3p;hsa-miR-181c-5p;hsa-miR-22-3p;hsa-miR-449c-5p;hsa-miR-9-5p;hsa-miR-98-5p;hsa-miR-148a-3p;NC_000017.11_32431;hsa-miR-181a-5p;hsa-miR-22-5p;hsa-miR-215-3p
TMEM156	80008	hsa_circ_0053716	0.454545	3.3362e-27	20	NC_000007.14_17824;hsa-miR-520a-3p;hsa-miR-92a-3p;NC_000002.12_3238;hsa-miR-3662;hsa-miR-3155a;NC_000021.9_35751;hsa-miR-7974;NC_000023.11_38289;hsa-let-7c-5p;NC_000001.11_3101;hsa-miR-512-3p;hsa-miR-548i;hsa-miR-510-5p;NC_000009.12_20733;hsa-miR-15b-3p;hsa-miR-5585-3p;hsa-miR-1323;hsa-miR-372-5p;NC_000007.14_17821
C19orf57	79173	hsa_circ_0052203	0.472222	3.59937e-27	15	NC_000014.9_29046;hsa-miR-6842-3p;hsa-miR-22-3p;hsa-miR-3929;hsa-miR-4435;hsa-miR-98-5p;NC_000017.11_32431*;hsa-miR-6511b-5p;hsa-miR-22-5p;NC_000011.10_24785;NC_000010.11_22289;NC_000010.11_22861;NC_000020.11_34751;hsa-miR-4443;NC_000009.12_21531
SLCO2A1	6578	hsa_circ_0052203	0.5	3.59937e-27	15	NC_000014.9_29046;hsa-miR-6807-5p;hsa-miR-181c-5p;hsa-miR-22-3p;hsa-miR-449c-5p;hsa-miR-3929;hsa-miR-98-5p;NC_000017.11_32431;NC_000017.11_32431*;hsa-miR-6511b-5p;hsa-miR-22-5p;NC_000011.10_24785;NC_000020.11_34751;hsa-miR-4443;NC_000009.12_21531
ANK1	286	hsa_circ_0038178	0.714286	3.8642e-27	15	hsa-miR-27a-3p;hsa-miR-24-3p;hsa-miR-6842-3p;hsa-miR-181c-5p;hsa-miR-9-5p;hsa-miR-3929;hsa-miR-4435;hsa-miR-664a-5p;NC_000017.11_32431;hsa-miR-181a-5p;hsa-miR-642a-5p;hsa-miR-22-5p;hsa-miR-6511b-5p;hsa-miR-1301-3p;hsa-miR-4443
IL6R	3570	hsa_circ_0053716	0.509091	3.91635e-27	19	NC_000007.14_17824;NC_000019.10_34542;hsa-miR-520a-3p;NC_000002.12_3238;hsa-miR-3662;hsa-miR-3155a;hsa-miR-7974;hsa-let-7c-5p;NC_000010.11_23303;NC_000001.11_3101;NC_000010.11_23646;hsa-miR-3677-5p;hsa-miR-548i;hsa-miR-510-5p;hsa-miR-302b-5p;hsa-miR-15b-3p;hsa-miR-5585-3p;hsa-miR-3529-3p;NC_000007.14_17821
TCAIM	285343	hsa_circ_0053716	0.418182	3.91635e-27	19	NC_000019.10_34542;hsa-miR-520a-3p;hsa-miR-92a-3p;NC_000004.12_9958;NC_000023.11_38289;hsa-miR-7974;NC_000003.12_9133;hsa-miR-302c-5p;NC_000010.11_23303;NC_000010.11_23646;hsa-miR-548i;hsa-miR-92a-1-5p;NC_000009.12_20733;hsa-miR-510-5p;hsa-miR-302b-5p;hsa-miR-15b-3p;hsa-miR-5585-3p;hsa-miR-3529-3p;hsa-miR-3662
PRKCQ	5588	hsa_circ_0008221	0.0697115	4.13013e-27	18	hsa-miR-328-3p;hsa-miR-30d-5p;hsa-miR-499a-5p;NC_000003.12_9115;hsa-miR-215-5p;hsa-miR-659-5p;hsa-miR-181c-5p;hsa-miR-22-3p;NC_000002.12_3880;hsa-miR-3929;hsa-miR-664a-5p;NC_000017.11_32431;hsa-miR-203a-3p;hsa-miR-181a-5p;hsa-miR-22-5p;NC_000010.11_22861;NC_000011.10_24785;hsa-miR-4443
CNTNAP2	26047	hsa_circ_0052203	0.583333	4.41799e-27	16	NC_000014.9_29046;hsa-miR-6842-3p;hsa-miR-6807-5p;hsa-miR-181c-5p;NC_000002.12_3880;hsa-miR-449c-5p;hsa-miR-3929;hsa-miR-98-5p;NC_000017.11_32431;hsa-miR-6511b-5p;hsa-miR-22-5p;NC_000011.10_24785;NC_000010.11_22289;NC_000010.11_22861;hsa-miR-4443;NC_000009.12_21531
CDC6	990	hsa_circ_0008221	0.0576923	4.45827e-27	17	hsa-miR-328-3p;hsa-miR-499a-5p;NC_000016.10_31515;hsa-miR-24-3p;hsa-miR-6842-3p;hsa-miR-181c-5p;hsa-miR-9-5p;hsa-miR-449c-5p;hsa-miR-22-3p;hsa-miR-3929;hsa-miR-369-3p;hsa-miR-664a-5p;hsa-miR-98-5p;hsa-miR-181a-5p;hsa-miR-6511b-5p;hsa-miR-22-5p;NC_000011.10_24785
JADE2	23338	hsa_circ_0006957	0.105442	4.54355e-27	16	hsa-miR-30d-5p;hsa-miR-193a-5p;NC_000014.9_29046;hsa-miR-27a-3p;NC_000003.12_9115;hsa-miR-24-3p;hsa-miR-22-3p;hsa-miR-449c-5p;NC_000016.10_31213;hsa-miR-3929;hsa-miR-9-5p;NC_000019.10_34428;hsa-miR-22-5p;NC_000016.10_31515;NC_000011.10_24785;NC_000020.11_34751
ANXA4	307	hsa_circ_0059713	0.463415	4.63255e-27	18	NC_000006.12_16700;hsa-miR-3662;NC_000009.12_21957;NC_000021.9_35751;hsa-miR-7974;hsa-miR-573;hsa-miR-20a-5p;NC_000003.12_9133;NC_000011.10_25384;hsa-miR-548i;NC_000018.10_33504*;hsa-miR-582-5p;hsa-miR-1323;NC_000006.12_15769;hsa-miR-205-5p;NC_000018.10_33037;hsa-miR-372-5p;hsa-miR-34c-5p
HELLS	3070	hsa_circ_0012566	0.76	4.96407e-27	16	hsa-miR-30d-5p;hsa-miR-499a-5p;hsa-miR-193a-5p;NC_000003.12_9115;NC_000016.10_31515;NW_003315954.1_39634;hsa-miR-24-3p;hsa-miR-181c-5p;hsa-miR-9-5p;hsa-miR-664a-5p;hsa-miR-203a-3p;hsa-miR-181a-5p;hsa-miR-6511b-5p;NC_000010.11_22861;NC_000008.11_18787;NC_000009.12_21531
DTNB	1838	hsa_circ_0008221	0.0745192	4.96407e-27	16	hsa-miR-328-3p;hsa-miR-21-5p;hsa-miR-215-5p;hsa-miR-24-3p;hsa-miR-6842-3p;hsa-miR-181c-5p;hsa-miR-9-5p;hsa-miR-22-3p;hsa-miR-3929;hsa-miR-98-5p;hsa-miR-203a-3p;hsa-miR-181a-5p;hsa-miR-6511b-5p;NC_000016.10_31515;NC_000011.10_24785;NC_000020.11_34751
GMNN	51053	hsa_circ_0008221	0.0528846	4.96407e-27	16	hsa-miR-30d-5p;hsa-miR-499a-5p;hsa-miR-193a-5p;hsa-miR-27a-3p;NC_000003.12_9115;hsa-miR-181c-5p;hsa-miR-449c-5p;hsa-miR-3929;hsa-miR-664a-5p;hsa-miR-98-5p;hsa-miR-203a-3p;hsa-miR-181a-5p;hsa-miR-22-5p;NC_000010.11_22861;NC_000011.10_23882;NC_000011.10_24785
NFIB	4781	hsa_circ_0086848	0.489796	5.12979e-27	16	hsa-miR-193a-5p;hsa-miR-6842-3p;NC_000005.10_13790;hsa-miR-22-3p;hsa-miR-449c-5p;hsa-miR-3929;hsa-miR-9-5p;hsa-miR-369-3p;hsa-miR-4435;hsa-miR-98-5p;hsa-miR-148a-3p;hsa-miR-203a-3p;hsa-miR-22-5p;NC_000010.11_22861;NC_000011.10_23882;hsa-miR-183-5p
INCENP	3619	hsa_circ_0086848	0.469388	5.12979e-27	16	hsa-miR-328-3p;hsa-miR-193a-5p;hsa-miR-24-3p;hsa-miR-6842-3p;NC_000005.10_13790;hsa-miR-9-5p;hsa-miR-22-3p;hsa-miR-449c-5p;hsa-miR-369-3p;hsa-miR-4435;hsa-miR-203a-3p;hsa-miR-22-5p;hsa-miR-6511b-5p;NC_000010.11_22861;NC_000011.10_23882;hsa-miR-4443
NTN4	59277	hsa_circ_0059713	0.487805	5.21548e-27	19	NC_000006.12_16700;hsa-miR-92a-3p;NC_000023.11_36905;hsa-miR-302a-5p;NC_000021.9_35751;hsa-miR-7974;hsa-miR-573;NC_000016.10_31157;NC_000003.12_9133;hsa-miR-20a-5p;NC_000010.11_23646;hsa-miR-7-5p;hsa-miR-582-5p;NC_000009.12_21925;NC_000002.12_3238;hsa-miR-205-5p;NC_000008.11_20037;hsa-miR-34c-5p;NC_000006.12_15769
GFPT1	2673	hsa_circ_0059713	0.585366	5.93803e-27	22	hsa-miR-573;hsa-miR-582-5p;hsa-miR-3529-3p;hsa-miR-34c-5p;NC_000006.12_16700;NC_000003.12_9133;hsa-miR-373-5p;NC_000018.10_33504*;hsa-miR-526b-5p;NC_000006.12_15769;NC_000018.10_33037;hsa-miR-3662;NC_000005.10_11919>NC_000005.10_11920;NC_000010.11_23646;NC_000016.10_31157;NC_000022.11_36437;hsa-miR-7-5p;hsa-miR-205-5p;hsa-miR-372-5p;hsa-miR-20a-5p;hsa-miR-371a-5p;hsa-miR-1323
DIAPH3	81624	hsa_circ_0059354	0.511111	6.30348e-27	16	hsa-miR-30d-5p;hsa-miR-6842-3p;hsa-miR-181c-5p;hsa-miR-9-5p;hsa-miR-22-3p;hsa-miR-3929;NC_000002.12_3880;hsa-miR-98-5p;NC_000017.11_32431;hsa-miR-181a-5p;hsa-miR-22-5p;NC_000010.11_22861;hsa-miR-6511b-5p;hsa-miR-215-3p;NC_000011.10_24785;hsa-miR-4443
PBX1	5087	hsa_circ_0059354	0.422222	6.30348e-27	16	hsa-miR-193a-5p;NC_000014.9_29046;hsa-miR-24-3p;hsa-miR-181c-5p;hsa-miR-9-5p;hsa-miR-22-3p;hsa-miR-3929;NC_000002.12_3880;hsa-miR-98-5p;NC_000017.11_32431;hsa-miR-181a-5p;hsa-miR-6511b-5p;hsa-miR-22-5p;hsa-miR-215-3p;NC_000010.11_22861;hsa-miR-4443
LMO7	4008	hsa_circ_0076332	0.594595	6.48707e-27	21	hsa-miR-522-3p;NC_000013.11_27627;NC_000008.11_19445;hsa-miR-302a-5p;hsa-miR-3662;hsa-miR-520c-3p;NC_000018.10_33742;hsa-miR-573;hsa-miR-20a-5p;hsa-miR-373-5p;NC_000012.12_26286;hsa-miR-3143;hsa-miR-27b-5p;NC_000003.12_8583;NC_000003.12_7973;hsa-miR-15b-3p;NC_000006.12_15769;NC_000007.14_17821;hsa-miR-17-5p;hsa-miR-34c-5p;hsa-miR-18a-3p
GINS1	9837	hsa_circ_0008221	0.0625	6.49172e-27	15	hsa-miR-21-5p;hsa-miR-155-5p;hsa-miR-27a-3p;NC_000016.10_31515;hsa-miR-6842-3p;NC_000002.12_3880;hsa-miR-449c-5p;hsa-miR-3929;hsa-miR-664a-5p;hsa-miR-98-5p;hsa-miR-203a-3p;hsa-miR-6511b-5p;hsa-miR-22-5p;NC_000020.11_34751;NC_000009.12_21531
CENPN	55839	hsa_circ_0008221	0.0576923	6.49172e-27	15	hsa-miR-21-5p;NC_000014.9_29046;hsa-miR-155-5p;NC_000016.10_31515;hsa-miR-24-3p;hsa-miR-6842-3p;NC_000002.12_3880;hsa-miR-3929;hsa-miR-664a-5p;hsa-miR-98-5p;hsa-miR-203a-3p;hsa-miR-6511b-5p;hsa-miR-22-5p;NC_000020.11_34751;NC_000009.12_21531
OVOS2	144203	hsa_circ_0008221	0.0552885	6.49172e-27	15	hsa-miR-193a-5p;NC_000014.9_29046;hsa-miR-6842-3p;hsa-miR-181c-5p;NC_000002.12_3880;hsa-miR-9-5p;NC_000016.10_31213;hsa-miR-3929;NC_000017.11_32431;hsa-miR-203a-3p;hsa-miR-181a-5p;NC_000011.10_23882;NC_000020.11_34751;hsa-miR-4443;NC_000009.12_21531
PER2	8864	hsa_circ_0008221	0.0793269	6.49172e-27	15	hsa-miR-193a-5p;hsa-miR-21-5p;hsa-miR-155-5p;NC_000003.12_9115;hsa-miR-215-5p;hsa-miR-24-3p;hsa-miR-659-5p;NC_000002.12_3880;hsa-miR-9-5p;hsa-miR-3929;hsa-miR-664a-5p;hsa-miR-203a-3p;hsa-miR-6511b-5p;hsa-miR-22-5p;NC_000009.12_21531
PLEKHA6	22874	hsa_circ_0030467	0.659574	7.04569e-27	15	hsa-miR-21-5p;NC_000011.10_23807;hsa-miR-181c-5p;NC_000002.12_3880;hsa-miR-22-3p;hsa-miR-3929;hsa-miR-4435;hsa-miR-664a-5p;hsa-miR-9-5p;hsa-miR-203a-3p;NC_000023.11_37419;hsa-miR-22-5p;hsa-miR-6761-5p;hsa-miR-3189-3p;NC_000009.12_21531
ORC1	4998	hsa_circ_0086848	0.387755	7.16253e-27	15	hsa-miR-4443;hsa-miR-24-3p;hsa-miR-659-5p;hsa-miR-6842-3p;NC_000005.10_13790;hsa-miR-22-3p;hsa-miR-449c-5p;hsa-miR-3929;hsa-miR-9-5p;hsa-miR-98-5p;hsa-miR-148a-3p;NC_000019.10_34428;hsa-miR-6511b-5p;NC_000010.11_22861;hsa-miR-183-5p
PDGFRA	5156	hsa_circ_0086848	0.44898	7.16253e-27	15	hsa-miR-328-3p;hsa-miR-24-3p;hsa-miR-6842-3p;hsa-miR-9-5p;hsa-miR-449c-5p;hsa-miR-3929;hsa-miR-4435;hsa-miR-98-5p;hsa-miR-148a-3p;NC_000017.11_32431;hsa-miR-203a-3p;hsa-miR-22-5p;hsa-miR-6511b-5p;NC_000010.11_22861;hsa-miR-183-5p
TNFRSF19	55504	hsa_circ_0086848	0.44898	7.16253e-27	15	hsa-miR-193a-5p;hsa-miR-24-3p;hsa-miR-6842-3p;hsa-miR-369-3p;hsa-miR-9-5p;hsa-miR-22-3p;hsa-miR-449c-5p;hsa-miR-3929;hsa-miR-4435;hsa-miR-98-5p;hsa-miR-203a-3p;hsa-miR-6511b-5p;NC_000010.11_22861;NC_000011.10_23882;hsa-miR-4443
FXN	2395	hsa_circ_0086848	0.469388	7.16253e-27	15	hsa-miR-328-3p;hsa-miR-193a-5p;hsa-miR-4443;hsa-miR-24-3p;hsa-miR-659-5p;hsa-miR-6842-3p;hsa-miR-369-3p;hsa-miR-9-5p;hsa-miR-449c-5p;hsa-miR-3929;hsa-miR-98-5p;NC_000017.11_32431;hsa-miR-6511b-5p;NC_000010.11_22861;hsa-miR-183-5p
ATAD5	79915	hsa_circ_0030467	0.531915	7.57756e-27	13	hsa-miR-499a-5p;hsa-miR-21-5p;NC_000011.10_23807;NC_000002.12_3880;hsa-miR-22-3p;hsa-miR-3929;hsa-miR-4435;hsa-miR-664a-5p;hsa-miR-9-5p;NC_000023.11_37419;hsa-miR-22-5p;hsa-miR-6761-5p;NC_000009.12_21531
IQSEC2	23096	hsa_circ_0053716	0.490909	7.63408e-27	20	NC_000007.14_17824;NC_000002.12_3238;hsa-miR-3155a;NC_000021.9_35751;NC_000004.12_9958;NC_000023.11_38289;hsa-miR-7974;NC_000003.12_9133;hsa-let-7c-5p;NC_000001.11_3101;NC_000010.11_23646;hsa-miR-512-3p;hsa-miR-548i;hsa-miR-92a-1-5p;hsa-miR-510-5p;NC_000008.11_20037;hsa-miR-15b-3p;hsa-miR-5585-3p;hsa-miR-3529-3p;hsa-miR-3662
RBAK	57786	hsa_circ_0059713	0.536585	7.8725e-27	20	NC_000006.12_16700;hsa-miR-92a-3p;hsa-miR-302a-5p;NC_000021.9_35751;hsa-miR-20a-5p;hsa-miR-573;NC_000016.10_31157;NC_000011.10_25384;NC_000010.11_23646;NC_000022.11_36437;hsa-miR-373-5p;hsa-miR-7-5p;hsa-miR-582-5p;NC_000009.12_21925;hsa-miR-1323;hsa-miR-372-5p;NC_000002.12_3238;hsa-miR-205-5p;hsa-miR-3529-3p;hsa-miR-3662
UPP1	7378	hsa_circ_0059713	0.536585	7.8725e-27	20	NC_000023.11_36905;hsa-miR-302a-5p;hsa-miR-3662;hsa-miR-7974;hsa-miR-573;hsa-miR-526b-5p;NC_000003.12_9133;NC_000001.11_2997;NC_000016.10_31157;NC_000022.11_36437;hsa-miR-20a-5p;hsa-miR-373-5p;hsa-miR-548i;hsa-miR-582-5p;hsa-miR-371a-5p;NC_000009.12_21925;NC_000002.12_3238;hsa-miR-205-5p;hsa-miR-372-5p;hsa-miR-34c-5p
PLCE1	51196	hsa_circ_0052203	0.555556	8.32051e-27	16	NC_000024.10_38844;hsa-miR-6842-3p;hsa-miR-181c-5p;hsa-miR-22-3p;NC_000002.12_3880;hsa-miR-3929;hsa-miR-4435;hsa-miR-98-5p;NC_000017.11_32431;hsa-miR-6511b-5p;hsa-miR-22-5p;NC_000011.10_24785;NC_000010.11_22289;NC_000010.11_22861;NC_000020.11_34751;NC_000009.12_21531
LZTS1	11178	hsa_circ_0052203	0.638889	8.32051e-27	16	NC_000014.9_29046;hsa-miR-6842-3p;hsa-miR-22-3p;NC_000002.12_3880;hsa-miR-3929;hsa-miR-4435;hsa-miR-98-5p;NC_000017.11_32431;NC_000017.11_32431*;hsa-miR-6511b-5p;hsa-miR-642a-5p;hsa-miR-22-5p;NC_000011.10_24785;NC_000020.11_34751;hsa-miR-4443;NC_000009.12_21531
CDCA7	83879	hsa_circ_0052203	0.444444	8.47961e-27	15	NC_000024.10_38844;hsa-miR-26b-5p;hsa-miR-6842-3p;hsa-miR-6807-5p;hsa-miR-181c-5p;hsa-miR-449c-5p;hsa-miR-3929;hsa-miR-98-5p;NC_000017.11_32431;NC_000017.11_32431*;hsa-miR-6511b-5p;hsa-miR-642a-5p;hsa-miR-22-5p;NC_000011.10_24785;NC_000009.12_21531
ALDH5A1	7915	hsa_circ_0059354	0.422222	8.96554e-27	15	hsa-miR-30d-5p;hsa-miR-193a-5p;NC_000014.9_29046;hsa-miR-27a-3p;NC_000024.10_38844;hsa-miR-24-3p;hsa-miR-6842-3p;hsa-miR-9-5p;hsa-miR-449c-5p;NC_000002.12_3880;hsa-miR-4758-3p;hsa-miR-22-5p;hsa-miR-6511b-5p;NC_000010.11_22861;hsa-miR-215-3p
SLCO2A1	6578	hsa_circ_0059354	0.4	8.96554e-27	15	hsa-miR-193a-5p;NC_000014.9_29046;hsa-miR-24-3p;hsa-miR-181c-5p;hsa-miR-22-3p;hsa-miR-449c-5p;hsa-miR-3929;hsa-miR-98-5p;hsa-miR-4758-3p;NC_000017.11_32431;hsa-miR-181a-5p;hsa-miR-6511b-5p;hsa-miR-22-5p;NC_000011.10_24785;hsa-miR-4443
NCAPD2	9918	hsa_circ_0059354	0.422222	8.96554e-27	15	hsa-miR-193a-5p;hsa-miR-27a-3p;NC_000024.10_38844;hsa-miR-24-3p;hsa-miR-6842-3p;hsa-miR-9-5p;hsa-miR-449c-5p;hsa-miR-3929;hsa-miR-98-5p;hsa-miR-4758-3p;NC_000017.11_32431;hsa-miR-6511b-5p;hsa-miR-22-5p;hsa-miR-215-3p;hsa-miR-4443
MATN2	4147	hsa_circ_0059354	0.377778	8.96554e-27	15	hsa-miR-193a-5p;hsa-miR-27a-3p;hsa-miR-24-3p;hsa-miR-181c-5p;hsa-miR-22-3p;hsa-miR-449c-5p;hsa-miR-3929;hsa-miR-98-5p;hsa-miR-4758-3p;NC_000017.11_32431;hsa-miR-181a-5p;hsa-miR-22-5p;NC_000010.11_22861;hsa-miR-6511b-5p;hsa-miR-215-3p
DNMT1	1786	hsa_circ_0059354	0.444444	8.96554e-27	15	hsa-miR-193a-5p;hsa-miR-24-3p;hsa-miR-6842-3p;hsa-miR-181c-5p;hsa-miR-9-5p;hsa-miR-22-3p;hsa-miR-3929;NC_000002.12_3880;hsa-miR-98-5p;hsa-miR-148a-3p;hsa-miR-181a-5p;hsa-miR-22-5p;hsa-miR-215-3p;hsa-miR-6511b-5p;NC_000011.10_24785
ROR1	4919	hsa_circ_0006957	0.112245	9.6968e-27	16	hsa-miR-30d-5p;hsa-miR-21-5p;hsa-miR-155-5p;hsa-miR-27a-3p;NC_000014.9_29046;NC_000003.12_9115;hsa-miR-215-5p;hsa-miR-659-5p;hsa-miR-22-3p;hsa-miR-9-5p;hsa-miR-3929;hsa-miR-664a-5p;NC_000012.12_26540;hsa-miR-22-5p;NC_000010.11_22861;NC_000011.10_24785
GAS2L3	283431	hsa_circ_0012566	0.68	1.11069e-26	15	hsa-miR-30d-5p;hsa-miR-499a-5p;hsa-miR-193a-5p;NC_000003.12_9115;hsa-miR-181c-5p;hsa-miR-9-5p;hsa-miR-449c-5p;NC_000016.10_31213;hsa-miR-203a-3p;hsa-miR-181a-5p;hsa-miR-22-5p;NC_000010.11_22861;NC_000008.11_18787;hsa-miR-6511b-5p;NC_000009.12_21531
TRANK1	9881	hsa_circ_0012566	0.72	1.11069e-26	15	hsa-miR-499a-5p;hsa-miR-193a-5p;hsa-miR-24-3p;NC_000011.10_23882;hsa-miR-181c-5p;hsa-miR-9-5p;hsa-miR-22-3p;hsa-miR-664a-5p;hsa-miR-203a-3p;hsa-miR-181a-5p;hsa-miR-22-5p;NC_000010.11_22861;NC_000008.11_18787;hsa-miR-6511b-5p;NC_000009.12_21531
KANK2	25959	hsa_circ_0008221	0.0865385	1.12647e-26	17	hsa-miR-328-3p;hsa-miR-193a-5p;NC_000016.10_31515;hsa-miR-24-3p;hsa-miR-6842-3p;hsa-miR-9-5p;hsa-miR-22-3p;hsa-miR-3929;hsa-miR-664a-5p;NC_000017.11_32431;hsa-miR-203a-3p;hsa-miR-6511b-5p;hsa-miR-22-5p;NC_000011.10_24785;NC_000020.11_34751;hsa-miR-4443;NC_000009.12_21531
MPP2	4355	hsa_circ_0008221	0.108173	1.12647e-26	17	hsa-miR-328-3p;hsa-miR-193a-5p;NC_000014.9_29046;hsa-miR-24-3p;hsa-miR-6842-3p;hsa-miR-9-5p;hsa-miR-449c-5p;hsa-miR-3929;hsa-miR-664a-5p;hsa-miR-98-5p;NC_000017.11_32431;NC_000019.10_34428;hsa-miR-22-5p;NC_000011.10_24785;NC_000010.11_22861;NC_000020.11_34751;NC_000009.12_21531
PRKG2	5593	hsa_circ_0053716	0.472727	1.13994e-26	20	NC_000007.14_17824;NC_000019.10_34542;hsa-miR-520a-3p;NC_000002.12_3238;hsa-miR-3662;NC_000004.12_9958;hsa-miR-7974;hsa-miR-302c-5p;NC_000003.12_9133;hsa-let-7c-5p;NC_000001.11_3101;NC_000010.11_23646;hsa-miR-548i;NC_000018.10_33504*;hsa-miR-92a-1-5p;hsa-miR-302b-5p;hsa-miR-15b-3p;hsa-miR-5585-3p;hsa-miR-372-5p;NC_000007.14_17821
PODXL	5420	hsa_circ_0059354	0.444444	1.21956e-26	16	NC_000014.9_29046;hsa-miR-6842-3p;hsa-miR-181c-5p;hsa-miR-9-5p;hsa-miR-449c-5p;hsa-miR-22-3p;hsa-miR-3929;NC_000002.12_3880;hsa-miR-148a-3p;hsa-miR-181a-5p;hsa-miR-22-5p;NC_000010.11_22861;hsa-miR-6511b-5p;hsa-miR-215-3p;NC_000011.10_24785;hsa-miR-4443
SWT1	54823	hsa_circ_0059713	0.487805	1.2433e-26	20	NC_000006.12_16700;hsa-miR-302a-5p;hsa-miR-3662;hsa-miR-526b-5p;hsa-miR-573;NC_000016.10_31157;NC_000003.12_9133;hsa-miR-20a-5p;NC_000010.11_23646;NC_000011.10_25384;hsa-miR-7-5p;NC_000003.12_7276;NC_000009.12_21925;hsa-miR-1323;NC_000002.12_3238;hsa-miR-205-5p;NC_000018.10_33037;hsa-miR-3529-3p;NC_000005.10_11919>NC_000005.10_11920;NC_000006.12_15769
CYP19A1	1588	hsa_circ_0086848	0.346939	1.38703e-26	14	hsa-miR-328-3p;hsa-miR-193a-5p;hsa-miR-183-5p;hsa-miR-369-3p;hsa-miR-22-3p;hsa-miR-449c-5p;hsa-miR-3929;hsa-miR-98-5p;NC_000019.10_34428;hsa-miR-203a-3p;hsa-miR-6511b-5p;hsa-miR-22-5p;NC_000011.10_23882;hsa-miR-4443
PRSS37	136242	hsa_circ_0030467	0.510638	1.44732e-26	14	hsa-miR-499a-5p;hsa-miR-21-5p;hsa-miR-181c-5p;NC_000002.12_3880;hsa-miR-22-3p;NC_000011.10_23807;hsa-miR-664a-5p;hsa-miR-9-5p;hsa-miR-203a-3p;NC_000023.11_37419;hsa-miR-22-5p;hsa-miR-6761-5p;hsa-miR-3189-3p;NC_000009.12_21531
PSD3	23362	hsa_circ_0012566	0.72	1.44748e-26	16	hsa-miR-30d-5p;hsa-miR-21-5p;hsa-miR-499a-5p;hsa-miR-193a-5p;NC_000011.10_23882;hsa-miR-181c-5p;hsa-miR-22-3p;hsa-miR-9-5p;hsa-miR-664a-5p;hsa-miR-203a-3p;hsa-miR-181a-5p;hsa-miR-22-5p;NC_000010.11_22861;NC_000008.11_18787;hsa-miR-6511b-5p;NC_000009.12_21531
NFIB	4781	hsa_circ_0052203	0.527778	1.52821e-26	16	NC_000014.9_29046;NC_000024.10_38844;hsa-miR-6842-3p;hsa-miR-181c-5p;hsa-miR-22-3p;hsa-miR-449c-5p;hsa-miR-3929;hsa-miR-4435;hsa-miR-98-5p;hsa-miR-148a-3p;hsa-miR-22-5p;NC_000011.10_24785;NC_000010.11_22289;NC_000010.11_22861;NC_000020.11_34751;NC_000009.12_21531
INCENP	3619	hsa_circ_0052203	0.5	1.52821e-26	16	NC_000014.9_29046;NC_000024.10_38844;hsa-miR-6842-3p;hsa-miR-6807-5p;hsa-miR-181c-5p;hsa-miR-22-3p;hsa-miR-449c-5p;NC_000002.12_3880;hsa-miR-4435;hsa-miR-6511b-5p;hsa-miR-642a-5p;hsa-miR-22-5p;NC_000010.11_22861;NC_000020.11_34751;hsa-miR-4443;NC_000009.12_21531
SORBS2	8470	hsa_circ_0086848	0.489796	1.53818e-26	15	hsa-miR-193a-5p;hsa-miR-24-3p;hsa-miR-6842-3p;hsa-miR-22-3p;hsa-miR-3929;hsa-miR-98-5p;hsa-miR-148a-3p;NC_000017.11_32431;NC_000019.10_34428;hsa-miR-203a-3p;hsa-miR-6511b-5p;hsa-miR-22-5p;NC_000011.10_23882;NC_000010.11_22861;hsa-miR-4443
IFIT1	3434	hsa_circ_0086848	0.346939	1.53818e-26	15	hsa-miR-193a-5p;hsa-miR-659-5p;hsa-miR-6842-3p;hsa-miR-9-5p;hsa-miR-449c-5p;hsa-miR-3929;hsa-miR-4435;hsa-miR-148a-3p;NC_000017.11_32431;NC_000019.10_34428;hsa-miR-203a-3p;hsa-miR-22-5p;NC_000010.11_22861;NC_000011.10_23882;hsa-miR-183-5p
MPP2	4355	hsa_circ_0086848	0.469388	1.53818e-26	15	hsa-miR-328-3p;hsa-miR-193a-5p;hsa-miR-24-3p;hsa-miR-6842-3p;hsa-miR-9-5p;hsa-miR-449c-5p;hsa-miR-3929;hsa-miR-4435;hsa-miR-98-5p;hsa-miR-148a-3p;NC_000017.11_32431;NC_000019.10_34428;hsa-miR-22-5p;NC_000010.11_22861;hsa-miR-183-5p
YIPF5	81555	hsa_circ_0059713	0.463415	1.56981e-26	19	hsa-miR-92a-3p;hsa-miR-302a-5p;hsa-miR-20a-5p;NC_000016.10_31157;NC_000003.12_9133;NC_000001.11_2997;hsa-miR-373-5p;hsa-miR-548i;NC_000018.10_33504*;hsa-miR-7-5p;NC_000008.11_20037;hsa-miR-371a-5p;hsa-miR-372-5p;NC_000002.12_3238;NC_000022.11_36437;NC_000018.10_33037;hsa-miR-3529-3p;hsa-miR-3662;NC_000006.12_15769
CDT1	81620	hsa_circ_0008221	0.0576923	1.61849e-26	16	hsa-miR-328-3p;NC_000014.9_29046;hsa-miR-27a-3p;hsa-miR-24-3p;hsa-miR-659-5p;hsa-miR-6842-3p;hsa-miR-22-3p;NC_000002.12_3880;hsa-miR-3929;NC_000019.10_34428;hsa-miR-6511b-5p;NC_000016.10_31515;NC_000011.10_23882;NC_000020.11_34751;hsa-miR-4443;NC_000009.12_21531
ZNF385D	79750	hsa_circ_0053716	0.418182	1.68292e-26	19	hsa-miR-92a-3p;NC_000002.12_3238;hsa-miR-3662;hsa-miR-3155a;NC_000021.9_35751;hsa-miR-302c-5p;NC_000003.12_9133;NC_000010.11_23303;NC_000001.11_3101;NC_000010.11_23646;hsa-miR-512-3p;hsa-miR-548i;NC_000018.10_33504*;hsa-miR-92a-1-5p;hsa-miR-510-5p;NC_000008.11_20037;hsa-miR-5585-3p;hsa-miR-372-5p;NC_000007.14_17821
PNPLA8	50640	hsa_circ_0059713	0.536585	1.94275e-26	20	NC_000006.12_16700;hsa-miR-3662;NC_000021.9_35751;hsa-miR-7974;hsa-miR-573;hsa-miR-526b-5p;NC_000003.12_9133;NC_000016.10_31157;NC_000010.11_23646;NC_000022.11_36437;hsa-miR-20a-5p;hsa-miR-373-5p;NC_000011.10_25384;NC_000018.10_33504*;hsa-miR-582-5p;NC_000002.12_3238;hsa-miR-205-5p;NC_000018.10_33037;hsa-miR-372-5p;hsa-miR-34c-5p
CCNF	899	hsa_circ_0006957	0.0986395	1.9959e-26	16	hsa-miR-30d-5p;hsa-miR-193a-5p;hsa-miR-27a-3p;NC_000003.12_9115;hsa-miR-24-3p;hsa-miR-6807-5p;hsa-miR-9-5p;hsa-miR-449c-5p;hsa-miR-3929;hsa-miR-22-3p;hsa-miR-664a-5p;NC_000019.10_34428;hsa-miR-22-5p;NC_000016.10_31515;NC_000011.10_24785;NC_000020.11_34751
GNE	10020	hsa_circ_0076332	0.540541	1.99759e-26	20	NC_000013.11_27627;hsa-miR-3662;hsa-miR-520c-3p;NC_000003.12_7520;NC_000008.11_20037*;hsa-miR-573;NC_000018.10_33742;hsa-miR-20a-5p;NC_000010.11_23303;hsa-miR-512-3p;hsa-miR-373-5p;NC_000003.12_8583;NC_000003.12_7973;hsa-miR-15b-3p;hsa-miR-5585-3p;hsa-miR-1323;NC_000007.14_17821;hsa-miR-17-5p;hsa-miR-34c-5p;NC_000006.12_15769
RHBDD1	84236	hsa_circ_0076332	0.594595	1.99759e-26	20	NC_000013.11_27627;NC_000008.11_19445;hsa-miR-302a-5p;hsa-miR-3662;hsa-miR-520c-3p;NC_000018.10_33742;hsa-miR-573;hsa-miR-20a-5p;hsa-miR-373-5p;NC_000006.12_15769;hsa-miR-302b-5p;hsa-miR-3143;hsa-miR-27b-5p;NC_000003.12_7973;hsa-miR-15b-3p;hsa-miR-5585-3p;hsa-miR-1323;NC_000007.14_17821;hsa-miR-34c-5p;hsa-miR-18a-3p
ARHGEF19	128272	hsa_circ_0059354	0.422222	2.11138e-26	15	hsa-miR-193a-5p;NC_000014.9_29046;hsa-miR-24-3p;hsa-miR-6842-3p;hsa-miR-22-3p;hsa-miR-449c-5p;hsa-miR-3929;NC_000002.12_3880;hsa-miR-98-5p;NC_000017.11_32431;hsa-miR-6511b-5p;hsa-miR-22-5p;NC_000011.10_24785;NC_000010.11_22861;hsa-miR-4443
RRM2	6241	hsa_circ_0059354	0.355556	2.11138e-26	15	hsa-miR-30d-5p;hsa-miR-193a-5p;NC_000014.9_29046;hsa-miR-27a-3p;NC_000024.10_38844;hsa-miR-6842-3p;hsa-miR-9-5p;NC_000002.12_3880;hsa-miR-3929;hsa-miR-98-5p;hsa-miR-148a-3p;hsa-miR-22-5p;NC_000010.11_22861;NC_000011.10_24785;hsa-miR-4443
SERTAD4	56256	hsa_circ_0059354	0.333333	2.11138e-26	15	hsa-miR-30d-5p;hsa-miR-193a-5p;hsa-miR-27a-3p;NC_000024.10_38844;hsa-miR-6842-3p;hsa-miR-181c-5p;hsa-miR-9-5p;NC_000017.11_32431;hsa-miR-181a-5p;hsa-miR-22-5p;NC_000010.11_22861;hsa-miR-6511b-5p;hsa-miR-215-3p;NC_000011.10_24785;hsa-miR-4443
OAS2	4939	hsa_circ_0012566	0.64	2.21568e-26	15	hsa-miR-499a-5p;hsa-miR-21-5p;hsa-miR-193a-5p;NC_000016.10_31515;hsa-miR-24-3p;hsa-miR-9-5p;hsa-miR-449c-5p;NC_000016.10_31213;hsa-miR-664a-5p;hsa-miR-203a-3p;hsa-miR-22-5p;hsa-miR-6511b-5p;NC_000010.11_22861;NC_000008.11_18787;NC_000009.12_21531
LMNB2	84823	hsa_circ_0059354	0.488889	2.29599e-26	16	NC_000014.9_29046;hsa-miR-27a-3p;hsa-miR-24-3p;hsa-miR-9-5p;hsa-miR-449c-5p;hsa-miR-22-3p;NC_000002.12_3880;hsa-miR-4758-3p;hsa-miR-148a-3p;NC_000017.11_32431;hsa-miR-181a-5p;hsa-miR-6511b-5p;hsa-miR-22-5p;hsa-miR-215-3p;NC_000011.10_24785;hsa-miR-4443
NUP85	79902	hsa_circ_0059354	0.377778	2.51912e-26	14	hsa-miR-193a-5p;hsa-miR-30d-5p;hsa-miR-27a-3p;hsa-miR-24-3p;hsa-miR-6842-3p;hsa-miR-22-3p;hsa-miR-9-5p;hsa-miR-3929;NC_000017.11_32431;hsa-miR-22-5p;hsa-miR-215-3p;NC_000011.10_24785;NC_000010.11_22861;hsa-miR-4443
NREP	9315	hsa_circ_0059354	0.333333	2.51912e-26	14	hsa-miR-27a-3p;hsa-miR-24-3p;hsa-miR-6842-3p;hsa-miR-181c-5p;NC_000002.12_3880;hsa-miR-449c-5p;hsa-miR-9-5p;hsa-miR-98-5p;hsa-miR-148a-3p;hsa-miR-181a-5p;hsa-miR-22-5p;hsa-miR-215-3p;NC_000011.10_24785;NC_000010.11_22861
TTC39A	22996	hsa_circ_0059713	0.487805	2.65851e-26	19	NC_000006.12_16700;hsa-miR-302a-5p;NC_000009.12_21957;NC_000021.9_35751;hsa-miR-7974;hsa-miR-573;hsa-miR-526b-5p;hsa-miR-20a-5p;NC_000010.11_23646;NC_000022.11_36437;hsa-miR-548i;hsa-miR-7-5p;hsa-miR-371a-5p;NC_000009.12_21925;NC_000006.12_15769;hsa-miR-205-5p;NC_000018.10_33037;hsa-miR-3529-3p;hsa-miR-3662
INPP5D	3635	hsa_circ_0008221	0.0889423	2.70222e-26	17	hsa-miR-328-3p;hsa-miR-499a-5p;hsa-miR-21-5p;hsa-miR-155-5p;hsa-miR-193a-5p;NC_000014.9_29046;hsa-miR-659-5p;hsa-miR-6842-3p;hsa-miR-22-3p;hsa-miR-449c-5p;hsa-miR-9-5p;NC_000002.12_3880;NC_000017.11_32431;hsa-miR-22-5p;hsa-miR-6511b-5p;NC_000010.11_22861;NC_000011.10_24785
MYT1L	23040	hsa_circ_0038178	0.642857	2.77941e-26	15	hsa-miR-27a-3p;hsa-miR-24-3p;hsa-miR-6842-3p;hsa-miR-181c-5p;NC_000002.12_3880;hsa-miR-9-5p;hsa-miR-3929;hsa-miR-4435;hsa-miR-664a-5p;NC_000012.12_26540;NC_000017.11_32431;hsa-miR-181a-5p;hsa-miR-6511b-5p;hsa-miR-22-5p;hsa-miR-4443
KDM7A	80853	hsa_circ_0076332	0.594595	2.87345e-26	20	hsa-miR-522-3p;NC_000008.11_19445;hsa-miR-3662;hsa-miR-520c-3p;NC_000003.12_7520;NC_000018.10_33742;hsa-miR-573;hsa-miR-20a-5p;NC_000010.11_23303;hsa-miR-512-3p;hsa-miR-373-5p;hsa-miR-3143;NC_000003.12_7973;hsa-miR-15b-3p;NC_000006.12_15769;hsa-miR-1323;NC_000007.14_17821;hsa-miR-17-5p;hsa-miR-34c-5p;hsa-miR-18a-3p
DENND4A	10260	hsa_circ_0076332	0.594595	2.87345e-26	20	NC_000013.11_27627;NC_000008.11_19445;hsa-miR-3662;hsa-miR-520c-3p;NC_000003.12_7520;hsa-miR-20a-5p;hsa-miR-573;NC_000010.11_23303;hsa-miR-373-5p;NC_000008.11_20037;NC_000012.12_26286;hsa-miR-3143;hsa-miR-27b-5p;NC_000003.12_7973;hsa-miR-15b-3p;NC_000006.12_15769;hsa-miR-1323;NC_000007.14_17821;hsa-miR-17-5p;hsa-miR-34c-5p
DTL	51514	hsa_circ_0008221	0.0480769	3.05883e-26	15	hsa-miR-193a-5p;hsa-miR-21-5p;hsa-miR-499a-5p;hsa-miR-24-3p;hsa-miR-6842-3p;NC_000002.12_3880;hsa-miR-449c-5p;hsa-miR-3929;hsa-miR-664a-5p;hsa-miR-9-5p;hsa-miR-98-5p;hsa-miR-22-5p;NC_000011.10_24785;NC_000010.11_22861;hsa-miR-4443
WDHD1	11169	hsa_circ_0008221	0.0552885	3.05883e-26	15	hsa-miR-30d-5p;NC_000003.12_9115;NC_000016.10_31515;hsa-miR-6842-3p;hsa-miR-659-5p;hsa-miR-369-3p;NC_000002.12_3880;hsa-miR-9-5p;hsa-miR-3929;hsa-miR-98-5p;hsa-miR-203a-3p;hsa-miR-6511b-5p;hsa-miR-22-5p;hsa-miR-4443;NC_000009.12_21531
TTK	7272	hsa_circ_0008221	0.0528846	3.05883e-26	15	hsa-miR-328-3p;hsa-miR-499a-5p;NC_000014.9_29046;hsa-miR-155-5p;hsa-miR-21-5p;hsa-miR-22-3p;hsa-miR-9-5p;hsa-miR-98-5p;NC_000017.11_32431;hsa-miR-203a-3p;hsa-miR-181a-5p;hsa-miR-6511b-5p;hsa-miR-22-5p;NC_000020.11_34751;NC_000009.12_21531
TONSL	4796	hsa_circ_0086848	0.571429	3.1769e-26	15	hsa-miR-328-3p;hsa-miR-193a-5p;hsa-miR-4443;hsa-miR-24-3p;hsa-miR-6842-3p;NC_000005.10_13790;hsa-miR-22-3p;hsa-miR-449c-5p;hsa-miR-4435;hsa-miR-148a-3p;NC_000017.11_32431;hsa-miR-6511b-5p;hsa-miR-22-5p;NC_000010.11_22861;hsa-miR-183-5p
ALDH7A1	501	hsa_circ_0038178	0.607143	3.468e-26	14	hsa-miR-27a-3p;hsa-miR-24-3p;hsa-miR-6842-3p;hsa-miR-181c-5p;NC_000002.12_3880;hsa-miR-9-5p;hsa-miR-3929;hsa-miR-4435;hsa-miR-664a-5p;NC_000017.11_32431;hsa-miR-181a-5p;hsa-miR-22-5p;hsa-miR-1301-3p;hsa-miR-4443
FANCI	55215	hsa_circ_0052203	0.527778	4.08234e-26	15	NC_000024.10_38844;hsa-miR-6842-3p;hsa-miR-181c-5p;hsa-miR-22-3p;NC_000002.12_3880;hsa-miR-3929;hsa-miR-98-5p;NC_000017.11_32431;hsa-miR-6511b-5p;hsa-miR-642a-5p;hsa-miR-22-5p;NC_000010.11_22289;NC_000010.11_22861;NC_000020.11_34751;hsa-miR-4443
NRP2	8828	hsa_circ_0030467	0.468085	4.09475e-26	14	hsa-miR-499a-5p;hsa-miR-21-5p;NC_000002.12_3880;hsa-miR-22-3p;hsa-miR-3929;hsa-miR-4435;hsa-miR-664a-5p;hsa-miR-9-5p;hsa-miR-203a-3p;NC_000023.11_37419;hsa-miR-22-5p;hsa-miR-6761-5p;hsa-miR-3189-3p;NC_000009.12_21531
NRP2	8828	hsa_circ_0059354	0.555556	4.21543e-26	16	hsa-miR-30d-5p;hsa-miR-193a-5p;NC_000014.9_29046;hsa-miR-6842-3p;hsa-miR-9-5p;hsa-miR-22-3p;hsa-miR-3929;NC_000002.12_3880;hsa-miR-98-5p;hsa-miR-4758-3p;hsa-miR-181a-5p;hsa-miR-22-5p;NC_000010.11_22861;hsa-miR-6511b-5p;hsa-miR-215-3p;hsa-miR-4443
FIGN	55137	hsa_circ_0059354	0.622222	4.21543e-26	16	hsa-miR-30d-5p;hsa-miR-193a-5p;hsa-miR-27a-3p;hsa-miR-24-3p;hsa-miR-6842-3p;hsa-miR-181c-5p;hsa-miR-9-5p;hsa-miR-22-3p;hsa-miR-3929;NC_000002.12_3880;hsa-miR-98-5p;NC_000017.11_32431;hsa-miR-181a-5p;hsa-miR-6511b-5p;hsa-miR-22-5p;NC_000011.10_24785
NCAPD3	23310	hsa_circ_0012566	0.68	4.28188e-26	15	hsa-miR-193a-5p;hsa-miR-21-5p;NW_003315954.1_39634;hsa-miR-24-3p;NC_000011.10_23882;hsa-miR-181c-5p;hsa-miR-22-3p;hsa-miR-449c-5p;hsa-miR-9-5p;hsa-miR-181a-5p;hsa-miR-22-5p;NC_000010.11_22861;NC_000008.11_18787;hsa-miR-6511b-5p;NC_000009.12_21531
CCNF	899	hsa_circ_0012566	0.64	4.28188e-26	15	hsa-miR-30d-5p;hsa-miR-193a-5p;NC_000003.12_9115;NW_003315954.1_39634;hsa-miR-24-3p;hsa-miR-181c-5p;hsa-miR-9-5p;hsa-miR-449c-5p;hsa-miR-22-3p;hsa-miR-664a-5p;hsa-miR-181a-5p;hsa-miR-22-5p;NC_000016.10_31515;hsa-miR-6511b-5p;NC_000009.12_21531
FXN	2395	hsa_circ_0059354	0.444444	4.73323e-26	15	hsa-miR-193a-5p;NC_000014.9_29046;hsa-miR-24-3p;hsa-miR-6842-3p;hsa-miR-9-5p;hsa-miR-449c-5p;hsa-miR-3929;NC_000016.10_31213;NC_000002.12_3880;hsa-miR-98-5p;NC_000017.11_32431;hsa-miR-6511b-5p;NC_000010.11_22861;NC_000011.10_24785;hsa-miR-4443
RAI1	10743	hsa_circ_0006957	0.102041	4.73323e-26	15	hsa-miR-193a-5p;hsa-miR-21-5p;NC_000014.9_29046;NC_000003.12_9115;hsa-miR-24-3p;hsa-miR-659-5p;hsa-miR-9-5p;NC_000001.11_1021;hsa-miR-449c-5p;hsa-miR-22-3p;hsa-miR-3929;hsa-miR-664a-5p;hsa-miR-22-5p;NC_000011.10_23882;NC_000011.10_24785
KIF18B	146909	hsa_circ_0008221	0.100962	4.81808e-26	16	hsa-miR-328-3p;hsa-miR-499a-5p;hsa-miR-193a-5p;hsa-miR-659-5p;hsa-miR-6842-3p;hsa-miR-9-5p;NC_000002.12_3880;hsa-miR-3929;hsa-miR-664a-5p;hsa-miR-98-5p;NC_000017.11_32431;hsa-miR-6511b-5p;hsa-miR-22-5p;NC_000011.10_24785;hsa-miR-4443;NC_000009.12_21531
PIF1	80119	hsa_circ_0008221	0.0625	4.81808e-26	16	hsa-miR-328-3p;hsa-miR-21-5p;hsa-miR-24-3p;hsa-miR-6842-3p;hsa-miR-9-5p;hsa-miR-22-3p;hsa-miR-449c-5p;hsa-miR-3929;hsa-miR-664a-5p;hsa-miR-98-5p;NC_000017.11_32431;hsa-miR-6511b-5p;NC_000010.11_22861;NC_000011.10_24785;hsa-miR-4443;NC_000009.12_21531
SH2B3	10019	hsa_circ_0076332	0.594595	5.8285e-26	20	hsa-miR-302a-5p;hsa-miR-520c-3p;NC_000003.12_7520;NC_000008.11_20037*;hsa-miR-20a-5p;NC_000010.11_23303;hsa-miR-512-3p;hsa-miR-373-5p;NC_000006.12_15769;NC_000012.12_26286;hsa-miR-302b-5p;hsa-miR-27b-5p;NC_000008.11_20037;NC_000003.12_8583;NC_000003.12_7973;hsa-miR-15b-3p;hsa-miR-5585-3p;hsa-miR-17-5p;hsa-miR-3662;hsa-miR-18a-3p
VCPIP1	80124	hsa_circ_0076332	0.513514	6.24027e-26	19	hsa-miR-522-3p;NC_000013.11_27627;NC_000008.11_19445;hsa-miR-520c-3p;NC_000003.12_7520;NC_000008.11_20037*;hsa-miR-573;NC_000018.10_33742;hsa-miR-20a-5p;hsa-miR-373-5p;hsa-miR-3143;NC_000003.12_7973;hsa-miR-15b-3p;NC_000006.12_15769;hsa-miR-1323;hsa-miR-372-5p;hsa-miR-17-5p;hsa-miR-34c-5p;hsa-miR-18a-3p
PNPLA8	50640	hsa_circ_0076332	0.540541	6.24027e-26	19	NC_000013.11_27627;hsa-miR-3662;hsa-miR-520c-3p;NC_000003.12_7520;NC_000018.10_33742;hsa-miR-573;hsa-miR-20a-5p;hsa-miR-512-3p;hsa-miR-373-5p;hsa-miR-302b-5p;hsa-miR-3143;hsa-miR-27b-5p;NC_000003.12_8583;NC_000003.12_7973;hsa-miR-15b-3p;hsa-miR-5585-3p;hsa-miR-372-5p;hsa-miR-17-5p;hsa-miR-34c-5p
KCNJ2	3759	hsa_circ_0086848	0.489796	6.33519e-26	15	hsa-miR-193a-5p;hsa-miR-24-3p;NC_000005.10_13790;hsa-miR-9-5p;hsa-miR-22-3p;hsa-miR-449c-5p;hsa-miR-3929;hsa-miR-4435;hsa-miR-98-5p;NC_000017.11_32431;hsa-miR-148a-3p;hsa-miR-203a-3p;hsa-miR-6511b-5p;hsa-miR-22-5p;hsa-miR-4443
GTSE1	51512	hsa_circ_0086848	0.489796	6.33519e-26	15	hsa-miR-193a-5p;hsa-miR-24-3p;hsa-miR-6842-3p;NC_000005.10_13790;hsa-miR-9-5p;hsa-miR-22-3p;hsa-miR-449c-5p;hsa-miR-3929;hsa-miR-369-3p;hsa-miR-4435;NC_000017.11_32431;NC_000019.10_34428;hsa-miR-148a-3p;hsa-miR-6511b-5p;hsa-miR-22-5p
FRMD4B	23150	hsa_circ_0086848	0.387755	6.33519e-26	15	hsa-miR-24-3p;hsa-miR-6842-3p;hsa-miR-369-3p;hsa-miR-9-5p;hsa-miR-22-3p;hsa-miR-3929;hsa-miR-98-5p;NC_000017.11_32431;NC_000019.10_34428;hsa-miR-203a-3p;hsa-miR-22-5p;hsa-miR-6511b-5p;NC_000010.11_22861;NC_000011.10_23882;hsa-miR-4443
SP100	6672	hsa_circ_0086848	0.367347	6.33519e-26	15	hsa-miR-328-3p;hsa-miR-4443;hsa-miR-24-3p;hsa-miR-6842-3p;hsa-miR-369-3p;hsa-miR-9-5p;hsa-miR-22-3p;hsa-miR-3929;hsa-miR-98-5p;NC_000017.11_32431;NC_000019.10_34428;hsa-miR-22-5p;NC_000010.11_22861;NC_000011.10_23882;hsa-miR-183-5p
SLCO4A1	28231	hsa_circ_0059713	0.536585	6.98646e-26	20	NC_000006.12_16700;NC_000023.11_36905;hsa-miR-3662;NC_000021.9_35751;hsa-miR-7974;hsa-miR-573;NC_000016.10_31157;NC_000003.12_9133;NC_000001.11_2997;NC_000011.10_25384;hsa-miR-7-5p;NC_000003.12_7276;hsa-miR-371a-5p;NC_000009.12_21925;NC_000005.10_11919>NC_000005.10_11920;hsa-miR-1323;NC_000002.12_3238;NC_000022.11_36437;NC_000018.10_33037;hsa-miR-34c-5p
BTN3A1	11119	hsa_circ_0059354	0.377778	7.52714e-26	14	hsa-miR-27a-3p;hsa-miR-24-3p;hsa-miR-6842-3p;hsa-miR-22-3p;hsa-miR-449c-5p;hsa-miR-3929;NC_000016.10_31213;hsa-miR-98-5p;NC_000017.11_32431;hsa-miR-6511b-5p;hsa-miR-22-5p;hsa-miR-215-3p;NC_000011.10_24785;NC_000010.11_22861
TONSL	4796	hsa_circ_0052203	0.527778	8.42841e-26	15	hsa-miR-6842-3p;hsa-miR-6807-5p;hsa-miR-22-3p;hsa-miR-449c-5p;NC_000002.12_3880;hsa-miR-4435;hsa-miR-148a-3p;NC_000017.11_32431;NC_000017.11_32431*;hsa-miR-6511b-5p;hsa-miR-642a-5p;hsa-miR-22-5p;NC_000011.10_24785;NC_000010.11_22861;hsa-miR-4443
SP110	3431	hsa_circ_0052203	0.555556	8.42841e-26	15	NC_000014.9_29046;hsa-miR-26b-5p;NC_000024.10_38844;hsa-miR-6842-3p;hsa-miR-181c-5p;hsa-miR-3929;hsa-miR-4435;hsa-miR-98-5p;NC_000017.11_32431;hsa-miR-6511b-5p;hsa-miR-642a-5p;hsa-miR-22-5p;NC_000011.10_24785;NC_000010.11_22861;NC_000020.11_34751
PROM2	150696	hsa_circ_0052203	0.5	9.09791e-26	14	hsa-miR-6842-3p;hsa-miR-181c-5p;hsa-miR-22-3p;NC_000002.12_3880;hsa-miR-3929;hsa-miR-98-5p;NC_000017.11_32431*;hsa-miR-6511b-5p;hsa-miR-642a-5p;hsa-miR-22-5p;NC_000011.10_24785;NC_000010.11_22289;NC_000010.11_22861;NC_000020.11_34751
ISL1	3670	hsa_circ_0059354	0.355556	1.01573e-25	15	hsa-miR-30d-5p;hsa-miR-27a-3p;NC_000024.10_38844;hsa-miR-24-3p;hsa-miR-6842-3p;hsa-miR-22-3p;hsa-miR-9-5p;hsa-miR-3929;NC_000002.12_3880;hsa-miR-98-5p;NC_000017.11_32431;hsa-miR-6511b-5p;NC_000010.11_22861;hsa-miR-215-3p;NC_000011.10_24785
FANCI	55215	hsa_circ_0059354	0.4	1.01573e-25	15	hsa-miR-30d-5p;hsa-miR-27a-3p;NC_000024.10_38844;hsa-miR-6842-3p;hsa-miR-181c-5p;hsa-miR-22-3p;NC_000002.12_3880;hsa-miR-3929;hsa-miR-98-5p;NC_000017.11_32431;hsa-miR-181a-5p;hsa-miR-22-5p;NC_000010.11_22861;hsa-miR-6511b-5p;hsa-miR-4443
POLQ	10721	hsa_circ_0059354	0.422222	1.01573e-25	15	hsa-miR-30d-5p;hsa-miR-193a-5p;NC_000014.9_29046;hsa-miR-27a-3p;hsa-miR-24-3p;hsa-miR-6842-3p;hsa-miR-181c-5p;hsa-miR-9-5p;hsa-miR-22-3p;NC_000002.12_3880;hsa-miR-98-5p;NC_000017.11_32431;hsa-miR-181a-5p;hsa-miR-6511b-5p;hsa-miR-22-5p
PDLIM5	10611	hsa_circ_0059713	0.512195	1.05097e-25	20	NC_000006.12_16700;hsa-miR-302a-5p;hsa-miR-3662;NC_000021.9_35751;hsa-miR-7974;hsa-miR-573;hsa-miR-526b-5p;hsa-miR-20a-5p;NC_000011.10_25384;NC_000010.11_23646;NC_000018.10_33504*;hsa-miR-582-5p;hsa-miR-371a-5p;hsa-miR-372-5p;NC_000002.12_3238;hsa-miR-1323;NC_000018.10_33037;hsa-miR-3529-3p;hsa-miR-34c-5p;NC_000006.12_15769
HIPK3	10114	hsa_circ_0059713	0.585366	1.05097e-25	20	NC_000023.11_36905;NC_000021.9_35751;hsa-miR-7974;hsa-miR-573;NC_000016.10_31157;hsa-miR-20a-5p;NC_000011.10_25384;hsa-miR-373-5p;hsa-miR-7-5p;hsa-miR-582-5p;NC_000009.12_21925;NC_000005.10_11919>NC_000005.10_11920;hsa-miR-372-5p;NC_000002.12_3238;hsa-miR-205-5p;hsa-miR-1323;NC_000018.10_33037;hsa-miR-3529-3p;hsa-miR-34c-5p;NC_000006.12_15769
RAD51AP1	10635	hsa_circ_0008221	0.0504808	1.07633e-25	14	hsa-miR-499a-5p;hsa-miR-21-5p;hsa-miR-155-5p;NC_000003.12_9115;hsa-miR-27a-3p;hsa-miR-6842-3p;NC_000002.12_3880;hsa-miR-9-5p;hsa-miR-664a-5p;hsa-miR-203a-3p;hsa-miR-22-5p;NC_000011.10_23882;NC_000020.11_34751;NC_000009.12_21531
GATM	2628	hsa_circ_0006957	0.0612245	1.11385e-25	15	hsa-miR-30d-5p;hsa-miR-21-5p;hsa-miR-155-5p;hsa-miR-193a-5p;NC_000003.12_9115;hsa-miR-215-5p;hsa-miR-24-3p;hsa-miR-659-5p;hsa-miR-22-3p;hsa-miR-449c-5p;hsa-miR-9-5p;NC_000019.10_34428;NC_000016.10_31515;NC_000011.10_24785;NC_000020.11_34751
CCNF	899	hsa_circ_0038178	0.642857	1.18229e-25	14	hsa-miR-27a-3p;hsa-miR-24-3p;hsa-miR-6842-3p;hsa-miR-181c-5p;NC_000002.12_3880;hsa-miR-9-5p;hsa-miR-3929;hsa-miR-4435;hsa-miR-664a-5p;NC_000017.11_32431;hsa-miR-181a-5p;hsa-miR-6511b-5p;hsa-miR-22-5p;hsa-miR-4443
MTMR2	8898	hsa_circ_0059713	0.512195	1.18491e-25	19	NC_000006.12_16700;hsa-miR-92a-3p;NC_000023.11_36905;hsa-miR-3662;NC_000009.12_21957;hsa-miR-7974;hsa-miR-573;hsa-miR-20a-5p;NC_000003.12_9133;hsa-miR-7-5p;hsa-miR-582-5p;NC_000008.11_20037;hsa-miR-1323;NC_000002.12_3238;hsa-miR-205-5p;NC_000005.10_11919>NC_000005.10_11920;hsa-miR-372-5p;hsa-miR-34c-5p;NC_000006.12_15769
STXBP1	6812	hsa_circ_0059713	0.512195	1.18491e-25	19	hsa-miR-92a-3p;NC_000023.11_36905;hsa-miR-3662;hsa-miR-7974;hsa-miR-573;hsa-miR-526b-5p;NC_000003.12_9133;NC_000016.10_31157;NC_000010.11_23646;hsa-miR-20a-5p;NC_000011.10_25384;hsa-miR-373-5p;hsa-miR-582-5p;NC_000009.12_21925;NC_000002.12_3238;NC_000022.11_36437;NC_000005.10_11919>NC_000005.10_11920;hsa-miR-34c-5p;NC_000006.12_15769
RBBP8NL	140893	hsa_circ_0008221	0.0721154	1.21371e-25	15	hsa-miR-328-3p;hsa-miR-193a-5p;NC_000014.9_29046;hsa-miR-6842-3p;hsa-miR-22-3p;hsa-miR-449c-5p;hsa-miR-3929;hsa-miR-664a-5p;hsa-miR-9-5p;hsa-miR-6511b-5p;hsa-miR-22-5p;NC_000011.10_24785;NC_000020.11_34751;hsa-miR-4443;NC_000009.12_21531
DHRS2	10202	hsa_circ_0008221	0.0456731	1.21371e-25	15	hsa-miR-21-5p;NC_000014.9_29046;NC_000016.10_31515;hsa-miR-24-3p;hsa-miR-6842-3p;NC_000002.12_3880;hsa-miR-9-5p;hsa-miR-3929;hsa-miR-98-5p;NC_000017.11_32431;hsa-miR-203a-3p;hsa-miR-6511b-5p;hsa-miR-22-5p;NC_000011.10_24785;NC_000009.12_21531
SSTR1	6751	hsa_circ_0008221	0.0528846	1.21371e-25	15	hsa-miR-328-3p;hsa-miR-193a-5p;hsa-miR-21-5p;NC_000003.12_9115;hsa-miR-27a-3p;hsa-miR-24-3p;hsa-miR-369-3p;NC_000002.12_3880;hsa-miR-22-3p;NC_000016.10_31213;hsa-miR-449c-5p;NC_000017.11_32431;NC_000019.10_34428;hsa-miR-203a-3p;NC_000011.10_23882
ANLN	54443	hsa_circ_0008221	0.0504808	1.21371e-25	15	hsa-miR-328-3p;hsa-miR-21-5p;hsa-miR-155-5p;hsa-miR-659-5p;hsa-miR-6842-3p;hsa-miR-369-3p;NC_000002.12_3880;hsa-miR-9-5p;hsa-miR-98-5p;hsa-miR-664a-5p;NC_000017.11_32431;hsa-miR-6511b-5p;NC_000004.12_10963;hsa-miR-22-5p;NC_000011.10_24785
LOC81691	81691	hsa_circ_0008221	0.0576923	1.21371e-25	15	hsa-miR-21-5p;NC_000014.9_29046;hsa-miR-155-5p;hsa-miR-27a-3p;hsa-miR-215-5p;NC_000002.12_3880;hsa-miR-22-3p;hsa-miR-3929;hsa-miR-449c-5p;hsa-miR-98-5p;NC_000017.11_32431;NC_000011.10_24785;NC_000020.11_34751;hsa-miR-4443;NC_000009.12_21531
NUP85	79902	hsa_circ_0008221	0.0480769	1.21371e-25	15	hsa-miR-193a-5p;hsa-miR-30d-5p;hsa-miR-27a-3p;NC_000003.12_9115;hsa-miR-24-3p;hsa-miR-659-5p;hsa-miR-6842-3p;hsa-miR-22-3p;hsa-miR-9-5p;hsa-miR-3929;NC_000017.11_32431;hsa-miR-22-5p;NC_000011.10_24785;NC_000010.11_22861;hsa-miR-4443
IFIT3	3437	hsa_circ_0008221	0.0456731	1.21371e-25	15	hsa-miR-499a-5p;hsa-miR-27a-3p;hsa-miR-24-3p;hsa-miR-9-5p;hsa-miR-449c-5p;hsa-miR-3929;hsa-miR-664a-5p;hsa-miR-98-5p;hsa-miR-203a-3p;hsa-miR-6511b-5p;hsa-miR-22-5p;NC_000011.10_24785;NC_000010.11_22861;NC_000020.11_34751;NC_000009.12_21531
LBR	3930	hsa_circ_0008221	0.0504808	1.21371e-25	15	hsa-miR-30d-5p;hsa-miR-499a-5p;NC_000003.12_9115;hsa-miR-27a-3p;hsa-miR-24-3p;hsa-miR-181c-5p;hsa-miR-9-5p;hsa-miR-449c-5p;hsa-miR-98-5p;hsa-miR-664a-5p;NC_000017.11_32431;hsa-miR-203a-3p;hsa-miR-181a-5p;NC_000011.10_24785;NC_000009.12_21531
PKP2	5318	hsa_circ_0008221	0.0480769	1.21371e-25	15	hsa-miR-155-5p;hsa-miR-27a-3p;hsa-miR-24-3p;hsa-miR-659-5p;hsa-miR-6842-3p;hsa-miR-181c-5p;hsa-miR-9-5p;hsa-miR-664a-5p;NC_000017.11_32431;NC_000019.10_34428;hsa-miR-181a-5p;hsa-miR-6511b-5p;NC_000011.10_24785;NC_000020.11_34751;hsa-miR-4443
PRC1	9055	hsa_circ_0008221	0.0552885	1.21371e-25	15	hsa-miR-30d-5p;NC_000014.9_29046;hsa-miR-155-5p;NC_000003.12_9115;hsa-miR-6842-3p;hsa-miR-659-5p;hsa-miR-22-3p;hsa-miR-9-5p;hsa-miR-664a-5p;NC_000017.11_32431;hsa-miR-203a-3p;hsa-miR-6511b-5p;hsa-miR-22-5p;NC_000011.10_24785;NC_000009.12_21531
ZNF367	195828	hsa_circ_0008221	0.0552885	1.21371e-25	15	hsa-miR-499a-5p;hsa-miR-21-5p;NC_000014.9_29046;hsa-miR-24-3p;hsa-miR-6842-3p;NC_000002.12_3880;hsa-miR-9-5p;NC_000016.10_31213;hsa-miR-3929;NC_000017.11_32431;hsa-miR-203a-3p;hsa-miR-6511b-5p;NC_000020.11_34751;hsa-miR-4443;NC_000009.12_21531
ROBO1	6091	hsa_circ_0086848	0.530612	1.22385e-25	15	hsa-miR-193a-5p;hsa-miR-4443;hsa-miR-24-3p;hsa-miR-659-5p;hsa-miR-6842-3p;hsa-miR-22-3p;hsa-miR-3929;hsa-miR-4435;hsa-miR-98-5p;hsa-miR-148a-3p;NC_000017.11_32431;hsa-miR-203a-3p;hsa-miR-6511b-5p;hsa-miR-22-5p;hsa-miR-183-5p
MID1	4281	hsa_circ_0086848	0.428571	1.22385e-25	15	hsa-miR-328-3p;hsa-miR-193a-5p;hsa-miR-24-3p;hsa-miR-659-5p;hsa-miR-6842-3p;NC_000005.10_13790;hsa-miR-9-5p;hsa-miR-22-3p;hsa-miR-3929;hsa-miR-4435;hsa-miR-98-5p;NC_000017.11_32431;hsa-miR-203a-3p;hsa-miR-6511b-5p;hsa-miR-22-5p
SPIN4	139886	hsa_circ_0008221	0.0456731	1.32804e-25	16	hsa-miR-30d-5p;hsa-miR-21-5p;hsa-miR-155-5p;hsa-miR-27a-3p;hsa-miR-499a-5p;NC_000003.12_9115;hsa-miR-24-3p;hsa-miR-6842-3p;hsa-miR-369-3p;hsa-miR-449c-5p;NC_000017.11_32431;NC_000019.10_34428;hsa-miR-6511b-5p;NC_000016.10_31515;NC_000011.10_24785;NC_000009.12_21531
BTN3A2	11118	hsa_circ_0008221	0.0625	1.32804e-25	16	hsa-miR-328-3p;hsa-miR-193a-5p;hsa-miR-27a-3p;hsa-miR-24-3p;hsa-miR-6842-3p;hsa-miR-9-5p;hsa-miR-449c-5p;hsa-miR-3929;NC_000017.11_32431;NC_000019.10_34428;hsa-miR-181a-5p;hsa-miR-6511b-5p;hsa-miR-22-5p;NC_000011.10_23882;NC_000011.10_24785;hsa-miR-4443
RAD51	5888	hsa_circ_0008221	0.0504808	1.32804e-25	16	hsa-miR-193a-5p;NC_000003.12_9115;NC_000016.10_31515;hsa-miR-6842-3p;hsa-miR-9-5p;hsa-miR-22-3p;hsa-miR-449c-5p;hsa-miR-3929;hsa-miR-664a-5p;NC_000002.12_3880;NC_000017.11_32431;NC_000019.10_34428;hsa-miR-203a-3p;NC_000010.11_22861;NC_000020.11_34751;NC_000009.12_21531
CHD9	80205	hsa_circ_0076332	0.567568	1.404e-25	19	hsa-miR-522-3p;NC_000013.11_27627;hsa-miR-520c-3p;NC_000008.11_20037*;hsa-miR-20a-5p;hsa-miR-573;NC_000010.11_23303;hsa-miR-373-5p;NC_000008.11_20037;NC_000012.12_26286;hsa-miR-3143;hsa-miR-27b-5p;NC_000003.12_7973;hsa-miR-15b-3p;NC_000006.12_15769;hsa-miR-1323;hsa-miR-17-5p;NC_000007.14_17821;hsa-miR-18a-3p
CNTNAP2	26047	hsa_circ_0012566	0.68	1.4701e-25	15	hsa-miR-499a-5p;hsa-miR-193a-5p;NW_003315954.1_39634;NC_000011.10_23882;hsa-miR-181c-5p;hsa-miR-9-5p;hsa-miR-449c-5p;NC_000016.10_31213;hsa-miR-664a-5p;hsa-miR-181a-5p;hsa-miR-22-5p;NC_000010.11_22861;NC_000008.11_18787;hsa-miR-6511b-5p;NC_000009.12_21531
ASPM	259266	hsa_circ_0012566	0.72	1.4701e-25	15	hsa-miR-30d-5p;hsa-miR-21-5p;hsa-miR-499a-5p;NC_000003.12_9115;hsa-miR-24-3p;hsa-miR-181c-5p;hsa-miR-22-3p;hsa-miR-9-5p;hsa-miR-203a-3p;hsa-miR-181a-5p;hsa-miR-6511b-5p;hsa-miR-22-5p;NC_000008.11_18787;NC_000011.10_23882;NC_000009.12_21531
MGEA5	10724	hsa_circ_0053716	0.472727	1.52708e-25	20	NC_000007.14_17824;hsa-miR-92a-3p;hsa-miR-3662;hsa-miR-3155a;hsa-miR-7974;NC_000023.11_38289;hsa-let-7c-5p;NC_000003.12_9133;NC_000001.11_3101;hsa-miR-512-3p;hsa-miR-548i;hsa-miR-92a-1-5p;NC_000009.12_20733;hsa-miR-510-5p;NC_000008.11_20037;hsa-miR-372-5p;NC_000002.12_3238;hsa-miR-1323;hsa-miR-3529-3p;NC_000007.14_17821
SH2B3	10019	hsa_circ_0053716	0.490909	1.52708e-25	20	hsa-miR-520a-3p;hsa-miR-92a-3p;NC_000002.12_3238;hsa-miR-3155a;NC_000004.12_9958;NC_000023.11_38289;hsa-miR-7974;NC_000003.12_9133;hsa-let-7c-5p;NC_000010.11_23303;hsa-miR-512-3p;NC_000018.10_33504*;NC_000009.12_20733;hsa-miR-92a-1-5p;hsa-miR-302b-5p;NC_000008.11_20037;hsa-miR-15b-3p;hsa-miR-5585-3p;hsa-miR-3529-3p;hsa-miR-3662
TTBK2	146057	hsa_circ_0076332	0.621622	1.60763e-25	20	NC_000008.11_19445;hsa-miR-302a-5p;hsa-miR-3662;NC_000003.12_7520;hsa-miR-20a-5p;hsa-miR-573;NC_000010.11_23303;hsa-miR-548j-3p;hsa-miR-512-3p;hsa-miR-373-5p;NC_000008.11_20037;hsa-miR-3143;hsa-miR-27b-5p;NC_000003.12_8583;hsa-miR-18a-3p;NC_000006.12_15769;hsa-miR-1323;hsa-miR-372-5p;NC_000007.14_17821;hsa-miR-34c-5p
SP100	6672	hsa_circ_0052203	0.444444	1.68013e-25	15	NC_000014.9_29046;NC_000024.10_38844;hsa-miR-6842-3p;hsa-miR-181c-5p;hsa-miR-22-3p;NC_000002.12_3880;hsa-miR-3929;hsa-miR-98-5p;NC_000017.11_32431;NC_000017.11_32431*;hsa-miR-22-5p;NC_000010.11_22289;NC_000010.11_22861;hsa-miR-4443;NC_000009.12_21531
OAS2	4939	hsa_circ_0052203	0.5	1.68013e-25	15	NC_000024.10_38844;hsa-miR-6842-3p;hsa-miR-6807-5p;hsa-miR-449c-5p;hsa-miR-4435;hsa-miR-148a-3p;NC_000017.11_32431;NC_000017.11_32431*;hsa-miR-6511b-5p;hsa-miR-22-5p;NC_000011.10_24785;NC_000010.11_22861;NC_000020.11_34751;hsa-miR-4443;NC_000009.12_21531
KCNJ2	3759	hsa_circ_0052203	0.5	1.68013e-25	15	NC_000024.10_38844;hsa-miR-6807-5p;hsa-miR-181c-5p;hsa-miR-22-3p;hsa-miR-449c-5p;hsa-miR-3929;hsa-miR-4435;hsa-miR-98-5p;hsa-miR-148a-3p;NC_000017.11_32431;hsa-miR-6511b-5p;hsa-miR-22-5p;NC_000011.10_24785;NC_000020.11_34751;hsa-miR-4443
SERPINB2	5055	hsa_circ_0059713	0.439024	1.70274e-25	17	NC_000006.12_16700;NC_000023.11_36905;hsa-miR-302a-5p;hsa-miR-3662;hsa-miR-573;NC_000003.12_9133;NC_000010.11_23646;NC_000022.11_36437;hsa-miR-548i;hsa-miR-7-5p;NC_000008.11_20037;hsa-miR-372-5p;NC_000002.12_3238;hsa-miR-205-5p;hsa-miR-3529-3p;hsa-miR-34c-5p;NC_000006.12_15769
ZNF385D	79750	hsa_circ_0059713	0.536585	1.89972e-25	19	hsa-miR-92a-3p;NC_000023.11_36905;NC_000009.12_21957;NC_000021.9_35751;hsa-miR-526b-5p;hsa-miR-573;hsa-miR-20a-5p;NC_000003.12_9133;NC_000010.11_23646;NC_000022.11_36437;hsa-miR-373-5p;hsa-miR-548i;NC_000018.10_33504*;hsa-miR-7-5p;NC_000008.11_20037;NC_000002.12_3238;hsa-miR-205-5p;hsa-miR-372-5p;hsa-miR-3662
SPAG5	10615	hsa_circ_0059354	0.4	2.06169e-25	14	hsa-miR-193a-5p;hsa-miR-27a-3p;NC_000024.10_38844;hsa-miR-24-3p;hsa-miR-6842-3p;hsa-miR-181c-5p;hsa-miR-9-5p;hsa-miR-449c-5p;hsa-miR-3929;hsa-miR-98-5p;hsa-miR-181a-5p;hsa-miR-22-5p;hsa-miR-215-3p;hsa-miR-4443
SP110	3431	hsa_circ_0059354	0.377778	2.09632e-25	15	hsa-miR-193a-5p;NC_000014.9_29046;NC_000024.10_38844;hsa-miR-6842-3p;hsa-miR-181c-5p;hsa-miR-9-5p;hsa-miR-3929;hsa-miR-98-5p;NC_000017.11_32431;hsa-miR-181a-5p;hsa-miR-6511b-5p;hsa-miR-22-5p;hsa-miR-215-3p;NC_000011.10_24785;NC_000010.11_22861
GAS2L3	283431	hsa_circ_0059354	0.444444	2.09632e-25	15	hsa-miR-30d-5p;hsa-miR-193a-5p;NC_000024.10_38844;hsa-miR-181c-5p;hsa-miR-9-5p;hsa-miR-449c-5p;NC_000016.10_31213;hsa-miR-3929;NC_000002.12_3880;hsa-miR-98-5p;hsa-miR-181a-5p;hsa-miR-22-5p;NC_000010.11_22861;hsa-miR-6511b-5p;hsa-miR-215-3p
KCNAB2	8514	hsa_circ_0059354	0.422222	2.09632e-25	15	hsa-miR-193a-5p;NC_000014.9_29046;hsa-miR-27a-3p;hsa-miR-24-3p;hsa-miR-6842-3p;hsa-miR-9-5p;hsa-miR-449c-5p;hsa-miR-3929;hsa-miR-22-3p;NC_000017.11_32431;hsa-miR-181a-5p;hsa-miR-6511b-5p;hsa-miR-215-3p;NC_000011.10_24785;hsa-miR-4443
TRANK1	9881	hsa_circ_0059354	0.555556	2.09632e-25	15	hsa-miR-193a-5p;hsa-miR-24-3p;hsa-miR-6842-3p;hsa-miR-181c-5p;hsa-miR-9-5p;hsa-miR-22-3p;hsa-miR-3929;NC_000002.12_3880;hsa-miR-98-5p;NC_000017.11_32431;hsa-miR-181a-5p;hsa-miR-6511b-5p;hsa-miR-22-5p;NC_000010.11_22861;hsa-miR-4443
FGA	2243	hsa_circ_0059354	0.333333	2.09632e-25	15	hsa-miR-193a-5p;NC_000014.9_29046;hsa-miR-27a-3p;NC_000024.10_38844;hsa-miR-181c-5p;hsa-miR-9-5p;hsa-miR-449c-5p;hsa-miR-22-3p;NC_000002.12_3880;hsa-miR-98-5p;hsa-miR-181a-5p;hsa-miR-6511b-5p;hsa-miR-22-5p;hsa-miR-215-3p;NC_000011.10_24785
GLS	2744	hsa_circ_0053716	0.436364	2.28261e-25	19	NC_000007.14_17824;hsa-miR-520a-3p;hsa-miR-92a-3p;hsa-miR-3155a;NC_000021.9_35751;hsa-miR-7974;NC_000023.11_38289;hsa-miR-302c-5p;hsa-miR-512-3p;hsa-miR-548i;hsa-miR-510-5p;NC_000009.12_20733;hsa-miR-302b-5p;NC_000008.11_20037;hsa-miR-15b-3p;hsa-miR-5585-3p;hsa-miR-1323;hsa-miR-3529-3p;hsa-miR-3662
FIGNL1	63979	hsa_circ_0086848	0.428571	2.29696e-25	15	hsa-miR-328-3p;hsa-miR-193a-5p;hsa-miR-659-5p;hsa-miR-6842-3p;hsa-miR-369-3p;hsa-miR-22-3p;hsa-miR-449c-5p;hsa-miR-3929;hsa-miR-98-5p;NC_000017.11_32431;hsa-miR-203a-3p;hsa-miR-6511b-5p;hsa-miR-22-5p;NC_000011.10_23882;hsa-miR-4443
PIF1	80119	hsa_circ_0086848	0.44898	2.31657e-25	14	hsa-miR-328-3p;hsa-miR-24-3p;hsa-miR-6842-3p;NC_000005.10_13790;hsa-miR-9-5p;hsa-miR-22-3p;hsa-miR-449c-5p;hsa-miR-3929;hsa-miR-4435;hsa-miR-98-5p;NC_000017.11_32431;hsa-miR-6511b-5p;NC_000010.11_22861;hsa-miR-4443
ADCK3		hsa_circ_0086848	0.387755	2.31657e-25	14	hsa-miR-328-3p;hsa-miR-193a-5p;hsa-miR-4443;hsa-miR-659-5p;hsa-miR-6842-3p;NC_000005.10_13790;hsa-miR-3929;hsa-miR-4435;hsa-miR-148a-3p;NC_000019.10_34428;hsa-miR-6511b-5p;hsa-miR-22-5p;NC_000010.11_22861;hsa-miR-183-5p
KIF18B	146909	hsa_circ_0086848	0.44898	2.31657e-25	14	hsa-miR-328-3p;hsa-miR-193a-5p;hsa-miR-4443;hsa-miR-659-5p;hsa-miR-6842-3p;hsa-miR-9-5p;hsa-miR-3929;hsa-miR-4435;hsa-miR-98-5p;hsa-miR-148a-3p;NC_000017.11_32431;hsa-miR-6511b-5p;hsa-miR-22-5p;hsa-miR-183-5p
ASPH	444	hsa_circ_0059713	0.560976	2.31905e-25	20	NC_000006.12_16700;hsa-miR-3662;hsa-miR-7974;hsa-miR-573;hsa-miR-526b-5p;NC_000016.10_31157;hsa-miR-20a-5p;NC_000010.11_23646;NC_000022.11_36437;hsa-miR-373-5p;hsa-miR-7-5p;hsa-miR-582-5p;NC_000009.12_21925;hsa-miR-372-5p;NC_000002.12_3238;hsa-miR-205-5p;NC_000018.10_33037;hsa-miR-3529-3p;hsa-miR-34c-5p;NC_000006.12_15769
PRICKLE2	166336	hsa_circ_0038178	0.785714	2.36977e-25	15	hsa-miR-27a-3p;hsa-miR-24-3p;hsa-miR-6842-3p;hsa-miR-181c-5p;NC_000002.12_3880;hsa-miR-9-5p;hsa-miR-3929;hsa-miR-4435;hsa-miR-664a-5p;NC_000012.12_26540;NC_000017.11_32431;hsa-miR-181a-5p;hsa-miR-6511b-5p;hsa-miR-22-5p;hsa-miR-4443
DPYSL3	1809	hsa_circ_0006957	0.0986395	2.49517e-25	15	hsa-miR-193a-5p;hsa-miR-21-5p;NC_000014.9_29046;hsa-miR-27a-3p;hsa-miR-215-5p;hsa-miR-24-3p;hsa-miR-22-3p;NC_000001.11_1021;hsa-miR-3929;hsa-miR-9-5p;hsa-miR-664a-5p;hsa-miR-22-5p;NC_000011.10_23882;NC_000011.10_24785;NC_000020.11_34751
TICRR	90381	hsa_circ_0012566	0.72	2.62395e-25	15	hsa-miR-30d-5p;hsa-miR-193a-5p;NC_000003.12_9115;hsa-miR-24-3p;hsa-miR-181c-5p;hsa-miR-9-5p;hsa-miR-449c-5p;hsa-miR-22-3p;hsa-miR-664a-5p;hsa-miR-203a-3p;hsa-miR-181a-5p;hsa-miR-6511b-5p;hsa-miR-22-5p;NC_000011.10_23882;NC_000009.12_21531
CIT	11113	hsa_circ_0012566	0.72	2.62395e-25	15	hsa-miR-30d-5p;hsa-miR-193a-5p;NC_000003.12_9115;hsa-miR-24-3p;NC_000011.10_23882;hsa-miR-181c-5p;hsa-miR-9-5p;hsa-miR-22-3p;hsa-miR-664a-5p;hsa-miR-203a-3p;hsa-miR-181a-5p;hsa-miR-22-5p;NC_000010.11_22861;NC_000008.11_18787;hsa-miR-6511b-5p
PSD3	23362	hsa_circ_0014557	0.842105	2.65465e-25	14	hsa-miR-30d-5p;hsa-miR-27a-3p;hsa-miR-6842-3p;hsa-miR-9-5p;NC_000002.12_3880;hsa-miR-98-5p;NC_000017.11_32431;NC_000017.11_32431*;hsa-miR-181a-5p;hsa-miR-22-5p;hsa-miR-215-3p;hsa-miR-6511b-5p;NC_000011.10_23882;hsa-miR-3189-3p
JADE2	23338	hsa_circ_0014115	1	2.82482e-25	12	hsa-miR-328-3p;NC_000014.9_29046;hsa-miR-27a-3p;hsa-miR-24-3p;hsa-miR-6842-3p;hsa-miR-22-3p;hsa-miR-449c-5p;hsa-miR-3929;NC_000019.10_34428;hsa-miR-22-5p;NC_000020.11_34751;hsa-miR-183-5p
AHNAK2	113146	hsa_circ_0045194	0.894737	2.93048e-25	16	NC_000012.12_25887;NC_000020.11_35116;hsa-miR-3155a;NC_000003.12_9133;NC_000022.11_36437;hsa-miR-510-5p;hsa-miR-7-5p;NC_000005.10_14158;hsa-miR-92a-1-5p;hsa-miR-3143;hsa-miR-367-3p;hsa-miR-526b-5p;hsa-miR-205-5p;NC_000007.14_17821;hsa-miR-3662;NC_000006.12_15769
RNF14	9604	hsa_circ_0076332	0.567568	3.05214e-25	19	NC_000013.11_27627;hsa-miR-3662;hsa-miR-520c-3p;NC_000008.11_20037*;NC_000018.10_33742;hsa-miR-573;hsa-miR-20a-5p;hsa-miR-373-5p;NC_000008.11_20037;NC_000012.12_26286;hsa-miR-3143;NC_000003.12_8583;NC_000003.12_7973;hsa-miR-15b-3p;NC_000006.12_15769;hsa-miR-1323;hsa-miR-372-5p;hsa-miR-17-5p;hsa-miR-34c-5p
BCOR	54880	hsa_circ_0052203	0.5	3.24451e-25	15	hsa-miR-6842-3p;hsa-miR-22-3p;NC_000002.12_3880;hsa-miR-3929;hsa-miR-98-5p;NC_000017.11_32431;NC_000017.11_32431*;hsa-miR-6511b-5p;hsa-miR-642a-5p;hsa-miR-22-5p;NC_000011.10_24785;NC_000010.11_22289;NC_000020.11_34751;hsa-miR-4443;NC_000009.12_21531
CDCA2	157313	hsa_circ_0052203	0.472222	3.24451e-25	15	NC_000014.9_29046;NC_000024.10_38844;hsa-miR-6842-3p;hsa-miR-181c-5p;hsa-miR-22-3p;NC_000002.12_3880;hsa-miR-3929;hsa-miR-98-5p;NC_000017.11_32431;NC_000017.11_32431*;hsa-miR-6511b-5p;hsa-miR-22-5p;NC_000011.10_24785;NC_000020.11_34751;NC_000009.12_21531
HSPA13	6782	hsa_circ_0076332	0.567568	3.26673e-25	18	hsa-miR-522-3p;NC_000013.11_27627;NC_000008.11_19445;hsa-miR-3662;NC_000003.12_7520;NC_000008.11_20037*;NC_000010.11_23303;hsa-miR-373-5p;NC_000012.12_26286;hsa-miR-3143;NC_000003.12_8583;NC_000003.12_7973;hsa-miR-15b-3p;NC_000006.12_15769;hsa-miR-1323;NC_000008.11_20037;hsa-miR-34c-5p;hsa-miR-18a-3p
MYT1L	23040	hsa_circ_0030662	0.866667	3.3055e-25	13	hsa-miR-193a-5p;NC_000003.12_9115;hsa-miR-9-5p;hsa-miR-22-3p;NC_000016.10_31213;hsa-miR-3929;hsa-miR-4435;NC_000017.11_32431;NC_000017.11_32431*;hsa-miR-22-5p;NC_000008.11_18787;NC_000001.11_2749*;NC_000009.12_21531
RFC5	5985	hsa_circ_0059354	0.4	3.34136e-25	13	hsa-miR-6842-3p;hsa-miR-181c-5p;hsa-miR-9-5p;hsa-miR-22-3p;hsa-miR-449c-5p;hsa-miR-3929;hsa-miR-98-5p;hsa-miR-181a-5p;hsa-miR-6511b-5p;hsa-miR-22-5p;hsa-miR-215-3p;NC_000011.10_24785;hsa-miR-4443
TGFBI	7045	hsa_circ_0059354	0.288889	3.34136e-25	13	hsa-miR-193a-5p;NC_000014.9_29046;hsa-miR-27a-3p;hsa-miR-6842-3p;hsa-miR-181c-5p;NC_000002.12_3880;hsa-miR-22-3p;hsa-miR-9-5p;hsa-miR-4758-3p;hsa-miR-181a-5p;hsa-miR-6511b-5p;NC_000011.10_24785;hsa-miR-4443
RRM2	6241	hsa_circ_0008221	0.0504808	3.42629e-25	16	hsa-miR-30d-5p;hsa-miR-499a-5p;hsa-miR-193a-5p;hsa-miR-27a-3p;NC_000016.10_31515;NC_000014.9_29046;NC_000003.12_9115;hsa-miR-6842-3p;hsa-miR-9-5p;NC_000002.12_3880;hsa-miR-3929;hsa-miR-98-5p;hsa-miR-22-5p;NC_000010.11_22861;NC_000011.10_24785;hsa-miR-4443
DMBT1	1755	hsa_circ_0008221	0.100962	3.42629e-25	16	hsa-miR-328-3p;hsa-miR-499a-5p;hsa-miR-193a-5p;hsa-miR-27a-3p;hsa-miR-24-3p;hsa-miR-9-5p;hsa-miR-22-3p;hsa-miR-3929;NC_000017.11_32431;hsa-miR-203a-3p;hsa-miR-181a-5p;hsa-miR-22-5p;NC_000010.11_22861;hsa-miR-6511b-5p;NC_000011.10_24785;NC_000020.11_34751
LIF	3976	hsa_circ_0059713	0.463415	3.45447e-25	18	NC_000023.11_36905;hsa-miR-3662;NC_000009.12_21957;hsa-miR-7974;NC_000016.10_31157;hsa-miR-20a-5p;NC_000001.11_2997;NC_000010.11_23646;NC_000022.11_36437;hsa-miR-373-5p;hsa-miR-7-5p;hsa-miR-582-5p;hsa-miR-371a-5p;NC_000009.12_21925;NC_000002.12_3238;hsa-miR-205-5p;hsa-miR-372-5p;NC_000005.10_11919>NC_000005.10_11920
PLEKHA6	22874	hsa_circ_0038178	0.678571	3.51255e-25	15	hsa-miR-27a-3p;hsa-miR-24-3p;hsa-miR-6842-3p;hsa-miR-181c-5p;NC_000002.12_3880;hsa-miR-9-5p;hsa-miR-3929;hsa-miR-4435;hsa-miR-664a-5p;NC_000017.11_32431;hsa-miR-181a-5p;hsa-miR-642a-5p;hsa-miR-22-5p;hsa-miR-6511b-5p;hsa-miR-4443
TICRR	90381	hsa_circ_0068582	0.714286	3.54179e-25	13	hsa-miR-30d-5p;NC_000003.12_9115;hsa-miR-27a-3p;hsa-miR-24-3p;hsa-miR-6807-5p;hsa-miR-181c-5p;hsa-miR-9-5p;hsa-miR-98-5p;hsa-miR-664a-5p;hsa-miR-203a-3p;hsa-miR-181a-5p;hsa-miR-22-5p;NC_000011.10_24785
COL28A1	340267	hsa_circ_0052203	0.527778	3.8118e-25	16	NC_000014.9_29046;NC_000024.10_38844;hsa-miR-181c-5p;hsa-miR-22-3p;NC_000002.12_3880;hsa-miR-3929;hsa-miR-4435;hsa-miR-98-5p;hsa-miR-6511b-5p;hsa-miR-642a-5p;hsa-miR-22-5p;NC_000011.10_24785;NC_000010.11_22861;NC_000020.11_34751;hsa-miR-4443;NC_000009.12_21531
KIF4A	24137	hsa_circ_0059354	0.444444	4.17729e-25	15	NC_000014.9_29046;NC_000024.10_38844;hsa-miR-6842-3p;hsa-miR-9-5p;hsa-miR-449c-5p;hsa-miR-22-3p;NC_000002.12_3880;hsa-miR-148a-3p;NC_000017.11_32431;hsa-miR-6511b-5p;hsa-miR-22-5p;hsa-miR-215-3p;NC_000011.10_24785;NC_000010.11_22861;hsa-miR-4443
FRMD4B	23150	hsa_circ_0059354	0.422222	4.17729e-25	15	hsa-miR-30d-5p;hsa-miR-27a-3p;hsa-miR-24-3p;hsa-miR-6842-3p;hsa-miR-22-3p;hsa-miR-9-5p;hsa-miR-3929;NC_000016.10_31213;NC_000002.12_3880;hsa-miR-98-5p;NC_000017.11_32431;hsa-miR-22-5p;hsa-miR-6511b-5p;NC_000010.11_22861;hsa-miR-4443
GTSE1	51512	hsa_circ_0059354	0.4	4.17729e-25	15	hsa-miR-193a-5p;NC_000024.10_38844;hsa-miR-24-3p;hsa-miR-6842-3p;hsa-miR-181c-5p;hsa-miR-9-5p;hsa-miR-449c-5p;hsa-miR-22-3p;hsa-miR-3929;hsa-miR-148a-3p;NC_000017.11_32431;hsa-miR-181a-5p;hsa-miR-6511b-5p;hsa-miR-22-5p;NC_000011.10_24785
OAS2	4939	hsa_circ_0059354	0.377778	4.17729e-25	15	hsa-miR-193a-5p;NC_000024.10_38844;hsa-miR-24-3p;hsa-miR-6842-3p;hsa-miR-9-5p;hsa-miR-449c-5p;NC_000016.10_31213;hsa-miR-148a-3p;NC_000017.11_32431;hsa-miR-6511b-5p;hsa-miR-22-5p;hsa-miR-215-3p;NC_000011.10_24785;NC_000010.11_22861;hsa-miR-4443
ZNF608	57507	hsa_circ_0059354	0.466667	4.17729e-25	15	hsa-miR-30d-5p;hsa-miR-193a-5p;hsa-miR-27a-3p;NC_000024.10_38844;hsa-miR-6842-3p;hsa-miR-181c-5p;hsa-miR-9-5p;NC_000002.12_3880;hsa-miR-4758-3p;hsa-miR-181a-5p;hsa-miR-22-5p;NC_000010.11_22861;hsa-miR-215-3p;NC_000011.10_24785;hsa-miR-4443
GPR26	2849	hsa_circ_0086848	0.571429	4.19874e-25	15	hsa-miR-328-3p;hsa-miR-193a-5p;hsa-miR-24-3p;hsa-miR-6842-3p;NC_000005.10_13790;hsa-miR-9-5p;hsa-miR-449c-5p;hsa-miR-3929;hsa-miR-369-3p;hsa-miR-98-5p;NC_000017.11_32431;NC_000019.10_34428;hsa-miR-203a-3p;NC_000011.10_23882;hsa-miR-183-5p
PODXL	5420	hsa_circ_0086848	0.408163	4.19874e-25	15	hsa-miR-328-3p;hsa-miR-4443;hsa-miR-6842-3p;NC_000005.10_13790;hsa-miR-22-3p;hsa-miR-449c-5p;hsa-miR-3929;hsa-miR-9-5p;hsa-miR-4435;hsa-miR-148a-3p;hsa-miR-203a-3p;hsa-miR-22-5p;hsa-miR-6511b-5p;NC_000010.11_22861;hsa-miR-183-5p
ERN1	2081	hsa_circ_0053716	0.454545	4.20722e-25	20	hsa-miR-520a-3p;hsa-miR-3155a;NC_000021.9_35751;hsa-let-7c-5p;hsa-miR-302c-5p;NC_000003.12_9133;NC_000010.11_23303;NC_000001.11_3101;NC_000010.11_23646;hsa-miR-548i;NC_000018.10_33504*;hsa-miR-92a-1-5p;hsa-miR-510-5p;hsa-miR-302b-5p;NC_000008.11_20037;hsa-miR-15b-3p;NC_000002.12_3238;hsa-miR-372-5p;hsa-miR-3529-3p;NC_000007.14_17821
SKP2	6502	hsa_circ_0008221	0.0408654	4.21388e-25	15	hsa-miR-21-5p;NC_000014.9_29046;hsa-miR-27a-3p;hsa-miR-659-5p;hsa-miR-181c-5p;hsa-miR-22-3p;hsa-miR-369-3p;hsa-miR-3929;hsa-miR-449c-5p;hsa-miR-98-5p;NC_000019.10_34428;hsa-miR-203a-3p;hsa-miR-181a-5p;NC_000010.11_22861;NC_000011.10_23882
ARHGAP11A	9824	hsa_circ_0008221	0.0504808	4.21388e-25	15	hsa-miR-328-3p;hsa-miR-30d-5p;hsa-miR-499a-5p;NC_000003.12_9115;hsa-miR-215-5p;hsa-miR-6842-3p;hsa-miR-369-3p;hsa-miR-9-5p;hsa-miR-3929;hsa-miR-664a-5p;hsa-miR-98-5p;NC_000017.11_32431;hsa-miR-203a-3p;hsa-miR-6511b-5p;NC_000011.10_24785
ITPR1	3708	hsa_circ_0076332	0.594595	4.21525e-25	20	NC_000013.11_27627;hsa-miR-302a-5p;hsa-miR-3662;NC_000003.12_7520;NC_000018.10_33742;hsa-miR-573;hsa-miR-20a-5p;NC_000010.11_23303;hsa-miR-512-3p;NC_000006.12_15769;NC_000012.12_26286;hsa-miR-3143;NC_000003.12_8583;hsa-miR-15b-3p;hsa-miR-5585-3p;hsa-miR-1323;NC_000007.14_17821;hsa-miR-372-5p;hsa-miR-34c-5p;hsa-miR-18a-3p
PHLDA1	22822	hsa_circ_0076332	0.594595	4.44644e-25	19	NC_000013.11_27627;NC_000008.11_19445;hsa-miR-3662;hsa-miR-520c-3p;NC_000018.10_33742;hsa-miR-573;NC_000010.11_23303;hsa-miR-373-5p;hsa-miR-302b-5p;NC_000012.12_26286;NC_000003.12_8583;NC_000003.12_7973;hsa-miR-18a-3p;NC_000006.12_15769;hsa-miR-1323;hsa-miR-372-5p;hsa-miR-17-5p;NC_000007.14_17821;hsa-miR-522-3p
H2AFV	94239	hsa_circ_0012566	0.64	4.45398e-25	14	hsa-miR-193a-5p;NW_003315954.1_39634;hsa-miR-181c-5p;hsa-miR-9-5p;hsa-miR-449c-5p;hsa-miR-22-3p;hsa-miR-664a-5p;hsa-miR-203a-3p;hsa-miR-181a-5p;hsa-miR-6511b-5p;NC_000016.10_31515;NC_000008.11_18787;NC_000011.10_23882;NC_000009.12_21531
HMGB1	3146	hsa_circ_0012566	0.6	4.45398e-25	14	hsa-miR-30d-5p;hsa-miR-21-5p;hsa-miR-499a-5p;hsa-miR-24-3p;hsa-miR-181c-5p;hsa-miR-9-5p;hsa-miR-449c-5p;hsa-miR-664a-5p;hsa-miR-203a-3p;hsa-miR-181a-5p;hsa-miR-6511b-5p;hsa-miR-22-5p;NC_000011.10_23882;NC_000009.12_21531
RFC3	5983	hsa_circ_0006957	0.14966	4.75571e-25	16	hsa-miR-193a-5p;hsa-miR-21-5p;hsa-miR-155-5p;hsa-miR-27a-3p;NC_000014.9_29046;hsa-miR-215-5p;hsa-miR-24-3p;hsa-miR-659-5p;hsa-miR-9-5p;hsa-miR-449c-5p;hsa-miR-3929;hsa-miR-664a-5p;NC_000012.12_26540;hsa-miR-22-5p;NC_000010.11_22861;NC_000011.10_24785
MLLT4		hsa_circ_0076332	0.513514	5.13853e-25	18	hsa-miR-522-3p;NC_000013.11_27627;NC_000008.11_19445;NC_000018.10_33742;NC_000003.12_7520;hsa-miR-573;hsa-miR-18a-3p;NC_000010.11_23303;hsa-miR-373-5p;NC_000008.11_20037;NC_000012.12_26286;hsa-miR-3143;hsa-miR-15b-3p;NC_000006.12_15769;hsa-miR-1323;hsa-miR-372-5p;NC_000007.14_17821;hsa-miR-34c-5p
RASGRP3	25780	hsa_circ_0076332	0.486486	5.13853e-25	18	hsa-miR-522-3p;NC_000013.11_27627;NC_000008.11_19445;NC_000018.10_33742;NC_000003.12_7520;hsa-miR-573;NC_000010.11_23303;hsa-miR-373-5p;NC_000012.12_26286;hsa-miR-3143;hsa-miR-27b-5p;NC_000003.12_7973;hsa-miR-372-5p;NC_000006.12_15769;NC_000007.14_17821;hsa-miR-17-5p;hsa-miR-34c-5p;hsa-miR-18a-3p
TGFBR2	7048	hsa_circ_0086848	0.428571	5.24768e-25	14	hsa-miR-4443;hsa-miR-659-5p;hsa-miR-369-3p;hsa-miR-9-5p;hsa-miR-22-3p;hsa-miR-3929;hsa-miR-449c-5p;hsa-miR-4435;hsa-miR-98-5p;NC_000017.11_32431;hsa-miR-203a-3p;hsa-miR-6511b-5p;hsa-miR-22-5p;hsa-miR-183-5p
NCAPD2	9918	hsa_circ_0086848	0.44898	5.24768e-25	14	hsa-miR-193a-5p;hsa-miR-4443;hsa-miR-24-3p;hsa-miR-6842-3p;hsa-miR-9-5p;hsa-miR-449c-5p;hsa-miR-3929;hsa-miR-4435;hsa-miR-98-5p;NC_000017.11_32431;NC_000019.10_34428;hsa-miR-6511b-5p;hsa-miR-22-5p;hsa-miR-183-5p
BTN3A2	11118	hsa_circ_0086848	0.428571	5.24768e-25	14	hsa-miR-328-3p;hsa-miR-193a-5p;hsa-miR-24-3p;hsa-miR-6842-3p;hsa-miR-9-5p;hsa-miR-449c-5p;hsa-miR-3929;hsa-miR-4435;NC_000017.11_32431;NC_000019.10_34428;hsa-miR-6511b-5p;hsa-miR-22-5p;NC_000011.10_23882;hsa-miR-4443
C17orf53	78995	hsa_circ_0059354	0.333333	5.24768e-25	14	hsa-miR-193a-5p;NC_000014.9_29046;hsa-miR-6842-3p;hsa-miR-22-3p;hsa-miR-449c-5p;hsa-miR-3929;NC_000002.12_3880;hsa-miR-98-5p;NC_000017.11_32431;hsa-miR-22-5p;hsa-miR-6511b-5p;hsa-miR-215-3p;NC_000011.10_24785;hsa-miR-4443
TROAP	10024	hsa_circ_0059354	0.444444	5.24768e-25	14	hsa-miR-193a-5p;NC_000014.9_29046;hsa-miR-27a-3p;hsa-miR-24-3p;hsa-miR-181c-5p;hsa-miR-9-5p;hsa-miR-449c-5p;hsa-miR-3929;hsa-miR-22-3p;hsa-miR-4758-3p;hsa-miR-6511b-5p;hsa-miR-22-5p;NC_000011.10_24785;hsa-miR-4443
MCM5	4174	hsa_circ_0052203	0.472222	5.53954e-25	14	NC_000014.9_29046;hsa-miR-6842-3p;hsa-miR-6807-5p;hsa-miR-181c-5p;hsa-miR-22-3p;hsa-miR-449c-5p;hsa-miR-4435;hsa-miR-148a-3p;NC_000017.11_32431*;hsa-miR-6511b-5p;hsa-miR-642a-5p;hsa-miR-22-5p;NC_000011.10_24785;NC_000009.12_21531
PIK3CA	5290	hsa_circ_0076332	0.621622	5.75242e-25	20	NC_000013.11_27627;hsa-miR-302a-5p;hsa-miR-3662;NC_000003.12_7520;hsa-miR-520c-3p;hsa-miR-573;NC_000018.10_33742;hsa-miR-20a-5p;hsa-miR-512-3p;hsa-miR-373-5p;hsa-miR-302b-5p;hsa-miR-3143;NC_000003.12_8583;hsa-miR-15b-3p;hsa-miR-5585-3p;hsa-miR-1323;hsa-miR-372-5p;hsa-miR-17-5p;NC_000007.14_17821;NC_000006.12_15769
MEF2A	4205	hsa_circ_0076332	0.648649	5.75242e-25	20	hsa-miR-522-3p;NC_000013.11_27627;NC_000008.11_19445;hsa-miR-302a-5p;hsa-miR-3662;NC_000003.12_7520;hsa-miR-20a-5p;hsa-miR-512-3p;hsa-miR-373-5p;hsa-miR-302b-5p;NC_000008.11_20037;hsa-miR-3143;NC_000003.12_8583;NC_000003.12_7973;hsa-miR-372-5p;NC_000006.12_15769;hsa-miR-1323;hsa-miR-17-5p;NC_000007.14_17821;hsa-miR-18a-3p
ZNF701	55762	hsa_circ_0059713	0.487805	5.90414e-25	18	NC_000006.12_16700;hsa-miR-92a-3p;hsa-miR-7974;hsa-miR-526b-5p;NC_000016.10_31157;NC_000003.12_9133;hsa-miR-20a-5p;NC_000011.10_25384;hsa-miR-373-5p;NC_000018.10_33504*;hsa-miR-582-5p;hsa-miR-7-5p;NC_000009.12_21925;hsa-miR-1323;NC_000006.12_15769;hsa-miR-205-5p;hsa-miR-3529-3p;hsa-miR-3662
PIK3IP1	113791	hsa_circ_0008221	0.0480769	6.04831e-25	14	hsa-miR-328-3p;hsa-miR-30d-5p;hsa-miR-155-5p;NC_000003.12_9115;hsa-miR-27a-3p;hsa-miR-24-3p;hsa-miR-6842-3p;hsa-miR-22-3p;hsa-miR-449c-5p;hsa-miR-6511b-5p;NC_000010.11_22861;NC_000011.10_23882;NC_000011.10_24785;NC_000020.11_34751
MYB	4602	hsa_circ_0008221	0.0625	6.04831e-25	14	hsa-miR-193a-5p;NC_000014.9_29046;hsa-miR-155-5p;hsa-miR-27a-3p;hsa-miR-499a-5p;hsa-miR-6842-3p;hsa-miR-9-5p;hsa-miR-98-5p;hsa-miR-664a-5p;NC_000017.11_32431;hsa-miR-203a-3p;hsa-miR-22-5p;NC_000011.10_23882;NC_000010.11_22861
RFC5	5985	hsa_circ_0008221	0.0456731	6.04831e-25	14	hsa-miR-328-3p;hsa-miR-6842-3p;hsa-miR-181c-5p;hsa-miR-22-3p;hsa-miR-449c-5p;hsa-miR-3929;hsa-miR-9-5p;hsa-miR-98-5p;hsa-miR-203a-3p;hsa-miR-181a-5p;hsa-miR-6511b-5p;hsa-miR-22-5p;NC_000011.10_24785;hsa-miR-4443
PBX1	5087	hsa_circ_0052203	0.472222	6.08718e-25	15	NC_000014.9_29046;hsa-miR-181c-5p;hsa-miR-22-3p;NC_000002.12_3880;hsa-miR-3929;hsa-miR-98-5p;NC_000017.11_32431;NC_000017.11_32431*;hsa-miR-6511b-5p;hsa-miR-642a-5p;hsa-miR-22-5p;NC_000010.11_22861;NC_000020.11_34751;hsa-miR-4443;NC_000009.12_21531
TGM2	7052	hsa_circ_0052203	0.5	6.08718e-25	15	hsa-miR-6842-3p;hsa-miR-181c-5p;hsa-miR-449c-5p;hsa-miR-3929;hsa-miR-4435;hsa-miR-98-5p;NC_000017.11_32431;hsa-miR-6511b-5p;hsa-miR-642a-5p;hsa-miR-22-5p;NC_000010.11_22289;NC_000010.11_22861;NC_000020.11_34751;hsa-miR-4443;NC_000009.12_21531
DIAPH3	81624	hsa_circ_0052203	0.527778	6.08718e-25	15	hsa-miR-6842-3p;hsa-miR-181c-5p;hsa-miR-22-3p;NC_000002.12_3880;hsa-miR-3929;hsa-miR-4435;hsa-miR-98-5p;NC_000017.11_32431;NC_000017.11_32431*;hsa-miR-6511b-5p;hsa-miR-22-5p;NC_000011.10_24785;NC_000010.11_22861;NC_000020.11_34751;hsa-miR-4443
PLEC	5339	hsa_circ_0059713	0.560976	7.30426e-25	19	NC_000006.12_16700;hsa-miR-302a-5p;NC_000023.11_36905;NC_000021.9_35751;hsa-miR-7974;hsa-miR-573;hsa-miR-526b-5p;NC_000003.12_9133;NC_000011.10_25384;NC_000010.11_23646;hsa-miR-7-5p;NC_000003.12_7276;hsa-miR-371a-5p;NC_000009.12_21925;NC_000002.12_3238;hsa-miR-205-5p;NC_000005.10_11919>NC_000005.10_11920;hsa-miR-372-5p;hsa-miR-34c-5p
LZTS1	11178	hsa_circ_0086848	0.55102	7.4915e-25	15	hsa-miR-328-3p;hsa-miR-193a-5p;hsa-miR-24-3p;hsa-miR-659-5p;hsa-miR-6842-3p;NC_000005.10_13790;hsa-miR-9-5p;hsa-miR-22-3p;hsa-miR-3929;hsa-miR-4435;hsa-miR-98-5p;NC_000017.11_32431;hsa-miR-6511b-5p;hsa-miR-22-5p;hsa-miR-4443
ICMT	23463	hsa_circ_0059354	0.422222	8.06385e-25	15	hsa-miR-30d-5p;hsa-miR-193a-5p;hsa-miR-6842-3p;hsa-miR-181c-5p;hsa-miR-9-5p;hsa-miR-22-3p;hsa-miR-3929;hsa-miR-98-5p;NC_000017.11_32431;hsa-miR-181a-5p;hsa-miR-22-5p;NC_000010.11_22861;hsa-miR-6511b-5p;NC_000011.10_24785;hsa-miR-4443
TRIM14	9830	hsa_circ_0059354	0.444444	8.06385e-25	15	hsa-miR-6842-3p;hsa-miR-181c-5p;hsa-miR-9-5p;hsa-miR-449c-5p;hsa-miR-22-3p;hsa-miR-3929;NC_000002.12_3880;hsa-miR-98-5p;hsa-miR-148a-3p;hsa-miR-181a-5p;hsa-miR-6511b-5p;NC_000010.11_22861;hsa-miR-215-3p;NC_000011.10_24785;hsa-miR-4443
CADM1	23705	hsa_circ_0008221	0.0625	8.34514e-25	16	hsa-miR-30d-5p;hsa-miR-21-5p;hsa-miR-499a-5p;hsa-miR-27a-3p;NC_000016.10_31515;NC_000003.12_9115;hsa-miR-215-5p;hsa-miR-6842-3p;hsa-miR-369-3p;NC_000002.12_3880;hsa-miR-3929;hsa-miR-664a-5p;hsa-miR-98-5p;hsa-miR-6511b-5p;hsa-miR-22-5p;NC_000011.10_24785
ORC1	4998	hsa_circ_0008221	0.0576923	8.34514e-25	16	hsa-miR-21-5p;NC_000016.10_31515;hsa-miR-24-3p;hsa-miR-659-5p;hsa-miR-6842-3p;hsa-miR-9-5p;hsa-miR-22-3p;hsa-miR-449c-5p;hsa-miR-3929;hsa-miR-664a-5p;hsa-miR-98-5p;NC_000019.10_34428;hsa-miR-6511b-5p;NC_000010.11_22861;NC_000020.11_34751;hsa-miR-4443
CHAF1B	8208	hsa_circ_0008221	0.0480769	8.34514e-25	16	hsa-miR-328-3p;hsa-miR-193a-5p;hsa-miR-27a-3p;hsa-miR-181c-5p;hsa-miR-9-5p;NC_000002.12_3880;hsa-miR-3929;hsa-miR-664a-5p;NC_000017.11_32431;hsa-miR-203a-3p;hsa-miR-181a-5p;hsa-miR-6511b-5p;NC_000011.10_23882;NC_000011.10_24785;NC_000020.11_34751;NC_000009.12_21531
TUBGCP3	10426	hsa_circ_0012566	0.56	9.22363e-25	14	hsa-miR-30d-5p;hsa-miR-21-5p;hsa-miR-193a-5p;NC_000003.12_9115;hsa-miR-24-3p;hsa-miR-181c-5p;hsa-miR-9-5p;hsa-miR-449c-5p;hsa-miR-203a-3p;hsa-miR-181a-5p;hsa-miR-6511b-5p;hsa-miR-22-5p;NC_000008.11_18787;NC_000009.12_21531
MCM10	55388	hsa_circ_0012566	0.64	9.22363e-25	14	hsa-miR-30d-5p;hsa-miR-21-5p;hsa-miR-499a-5p;hsa-miR-24-3p;NC_000011.10_23882;hsa-miR-181c-5p;hsa-miR-9-5p;hsa-miR-664a-5p;hsa-miR-203a-3p;hsa-miR-181a-5p;hsa-miR-22-5p;NC_000016.10_31515;NC_000008.11_18787;hsa-miR-6511b-5p
SMC1A	8243	hsa_circ_0014557	0.842105	9.2822e-25	14	hsa-miR-30d-5p;hsa-miR-27a-3p;hsa-miR-6842-3p;hsa-miR-9-5p;NC_000002.12_3880;hsa-miR-98-5p;NC_000017.11_32431;NC_000017.11_32431*;hsa-miR-181a-5p;hsa-miR-22-5p;hsa-miR-215-3p;hsa-miR-6511b-5p;NC_000011.10_23882;hsa-miR-1301-3p
SDR16C5	195814	hsa_circ_0059713	0.463415	9.92844e-25	18	NC_000006.12_16700;hsa-miR-92a-3p;hsa-miR-3662;NC_000021.9_35751;hsa-miR-7974;hsa-miR-526b-5p;hsa-miR-20a-5p;NC_000003.12_9133;NC_000010.11_23646;hsa-miR-548i;NC_000018.10_33504*;hsa-miR-7-5p;NC_000009.12_21925;hsa-miR-1323;NC_000006.12_15769;hsa-miR-205-5p;NC_000018.10_33037;NC_000005.10_11919>NC_000005.10_11920
ZNF519	162655	hsa_circ_0030467	0.404255	1.02598e-24	13	hsa-miR-499a-5p;hsa-miR-21-5p;hsa-miR-181c-5p;hsa-miR-22-3p;NC_000011.10_23807;hsa-miR-3929;hsa-miR-4435;hsa-miR-664a-5p;hsa-miR-9-5p;hsa-miR-203a-3p;hsa-miR-22-5p;hsa-miR-3189-3p;NC_000009.12_21531
ALDH7A1	501	hsa_circ_0030467	0.425532	1.02598e-24	13	NC_000011.10_23807;hsa-miR-181c-5p;NC_000002.12_3880;hsa-miR-3929;hsa-miR-664a-5p;hsa-miR-4435;hsa-miR-9-5p;hsa-miR-203a-3p;NC_000023.11_37419;hsa-miR-22-5p;hsa-miR-6761-5p;hsa-miR-3189-3p;NC_000009.12_21531
KDM7A	80853	hsa_circ_0059713	0.536585	1.03018e-24	20	hsa-miR-3662;NC_000021.9_35751;hsa-miR-526b-5p;hsa-miR-573;NC_000016.10_31157;NC_000003.12_9133;hsa-miR-20a-5p;NC_000010.11_23646;NC_000011.10_25384;hsa-miR-373-5p;hsa-miR-582-5p;NC_000009.12_21925;NC_000005.10_11919>NC_000005.10_11920;hsa-miR-1323;NC_000002.12_3238;hsa-miR-7-5p;NC_000018.10_33037;hsa-miR-3529-3p;hsa-miR-34c-5p;NC_000006.12_15769
VTI1A	143187	hsa_circ_0045194	0.947368	1.07963e-24	17	NC_000012.12_25887;NC_000020.11_35116;hsa-miR-3155a;hsa-miR-26a-1-3p;NC_000022.11_36437;hsa-miR-510-5p;hsa-miR-302b-5p;NC_000005.10_14158;hsa-miR-7-5p;hsa-miR-3143;hsa-miR-367-3p;hsa-miR-92a-1-5p;hsa-miR-526b-5p;hsa-miR-205-5p;NC_000007.14_17821;hsa-miR-3662;NC_000006.12_15769
PRKCQ	5588	hsa_circ_0052203	0.555556	1.1123e-24	15	hsa-miR-26b-5p;NC_000024.10_38844;hsa-miR-6807-5p;hsa-miR-181c-5p;hsa-miR-22-3p;NC_000002.12_3880;hsa-miR-3929;hsa-miR-4435;NC_000017.11_32431;NC_000017.11_32431*;hsa-miR-642a-5p;hsa-miR-22-5p;NC_000011.10_24785;NC_000010.11_22861;hsa-miR-4443
MSH2	4436	hsa_circ_0052203	0.527778	1.1123e-24	15	NC_000014.9_29046;NC_000024.10_38844;hsa-miR-6842-3p;NC_000002.12_3880;hsa-miR-3929;hsa-miR-4435;hsa-miR-98-5p;NC_000017.11_32431;NC_000017.11_32431*;hsa-miR-6511b-5p;hsa-miR-22-5p;NC_000011.10_24785;NC_000020.11_34751;hsa-miR-4443;NC_000009.12_21531
CBX2	84733	hsa_circ_0052203	0.583333	1.1123e-24	15	hsa-miR-6842-3p;hsa-miR-181c-5p;hsa-miR-22-3p;NC_000002.12_3880;hsa-miR-3929;hsa-miR-4435;hsa-miR-98-5p;NC_000017.11_32431*;hsa-miR-6511b-5p;hsa-miR-642a-5p;hsa-miR-22-5p;NC_000011.10_24785;NC_000010.11_22861;hsa-miR-4443;NC_000009.12_21531
DMBT1	1755	hsa_circ_0086848	0.408163	1.13327e-24	14	hsa-miR-328-3p;hsa-miR-193a-5p;hsa-miR-24-3p;hsa-miR-9-5p;hsa-miR-22-3p;hsa-miR-3929;hsa-miR-4435;hsa-miR-148a-3p;NC_000017.11_32431;hsa-miR-203a-3p;hsa-miR-22-5p;hsa-miR-6511b-5p;NC_000010.11_22861;hsa-miR-183-5p
NCAPD2	9918	hsa_circ_0052203	0.5	1.2544e-24	14	NC_000024.10_38844;hsa-miR-6842-3p;hsa-miR-6807-5p;hsa-miR-449c-5p;hsa-miR-3929;hsa-miR-4435;hsa-miR-98-5p;NC_000017.11_32431;hsa-miR-6511b-5p;hsa-miR-22-5p;NC_000010.11_22289;NC_000020.11_34751;hsa-miR-4443;NC_000009.12_21531
KIF2C	11004	hsa_circ_0059354	0.4	1.2544e-24	14	hsa-miR-193a-5p;hsa-miR-27a-3p;NC_000024.10_38844;hsa-miR-24-3p;hsa-miR-181c-5p;hsa-miR-22-3p;hsa-miR-449c-5p;hsa-miR-4758-3p;NC_000017.11_32431;hsa-miR-181a-5p;hsa-miR-22-5p;NC_000010.11_22861;hsa-miR-6511b-5p;hsa-miR-215-3p
ADCK3		hsa_circ_0059354	0.4	1.2544e-24	14	hsa-miR-193a-5p;NC_000014.9_29046;hsa-miR-6842-3p;hsa-miR-181c-5p;NC_000002.12_3880;hsa-miR-3929;hsa-miR-148a-3p;hsa-miR-22-5p;hsa-miR-181a-5p;hsa-miR-215-3p;hsa-miR-6511b-5p;NC_000011.10_24785;NC_000010.11_22861;hsa-miR-4443
TSC22D1	8848	hsa_circ_0008261	0.944444	1.27361e-24	15	NC_000006.12_16700;NC_000019.10_34542;hsa-miR-7974;hsa-miR-302c-5p;NC_000016.10_31157;hsa-miR-514a-3p;NC_000010.11_23303;NC_000001.11_3101;hsa-miR-512-3p;hsa-miR-510-5p;NC_000007.14_18366;NC_000009.12_21925;NC_000005.10_13205;hsa-miR-302b-5p;hsa-miR-3529-3p
ACPP	55	hsa_circ_0008221	0.0408654	1.31372e-24	15	hsa-miR-30d-5p;hsa-miR-155-5p;hsa-miR-27a-3p;NC_000003.12_9115;hsa-miR-215-5p;hsa-miR-6842-3p;hsa-miR-9-5p;hsa-miR-449c-5p;hsa-miR-3929;NC_000002.12_3880;hsa-miR-98-5p;NC_000011.10_23882;NC_000011.10_24785;hsa-miR-4443;NC_000009.12_21531
MCM3	4172	hsa_circ_0008221	0.0504808	1.31372e-24	15	hsa-miR-328-3p;hsa-miR-193a-5p;hsa-miR-659-5p;hsa-miR-6842-3p;hsa-miR-369-3p;hsa-miR-9-5p;hsa-miR-22-3p;hsa-miR-664a-5p;NC_000017.11_32431;NC_000019.10_34428;hsa-miR-181a-5p;hsa-miR-22-5p;NC_000011.10_24785;hsa-miR-4443;NC_000009.12_21531
UNG	7374	hsa_circ_0008221	0.0432692	1.31372e-24	15	hsa-miR-499a-5p;hsa-miR-193a-5p;hsa-miR-155-5p;hsa-miR-659-5p;hsa-miR-6842-3p;hsa-miR-22-3p;hsa-miR-449c-5p;hsa-miR-3929;NC_000002.12_3880;NC_000017.11_32431;hsa-miR-22-5p;hsa-miR-6511b-5p;NC_000010.11_22861;NC_000011.10_24785;NC_000020.11_34751
CREBRF	153222	hsa_circ_0076332	0.540541	1.31529e-24	19	hsa-miR-522-3p;NC_000013.11_27627;NC_000008.11_19445;hsa-miR-520c-3p;NC_000003.12_7520;NC_000008.11_20037*;hsa-miR-573;NC_000018.10_33742;hsa-miR-20a-5p;hsa-miR-18a-3p;hsa-miR-373-5p;hsa-miR-3143;hsa-miR-27b-5p;hsa-miR-15b-3p;NC_000006.12_15769;hsa-miR-1323;hsa-miR-17-5p;NC_000007.14_17821;hsa-miR-34c-5p
TRAIP	10293	hsa_circ_0008221	0.0408654	1.35819e-24	13	hsa-miR-193a-5p;hsa-miR-21-5p;hsa-miR-27a-3p;hsa-miR-215-5p;hsa-miR-24-3p;hsa-miR-6842-3p;hsa-miR-181c-5p;hsa-miR-22-3p;hsa-miR-9-5p;NC_000019.10_34428;hsa-miR-6511b-5p;hsa-miR-22-5p;NC_000009.12_21531
TSC22D1	8848	hsa_circ_0026725	0.818182	1.36231e-24	16	NC_000019.10_34542;NC_000009.12_21574;NC_000011.10_24389*;NC_000009.12_21957;hsa-let-7c-5p;hsa-miR-573;NC_000011.10_25384;NC_000001.11_2997;hsa-miR-514a-3p;NC_000001.11_3101;NC_000010.11_23303;hsa-miR-512-3p;NC_000009.12_20733;NC_000007.14_18366;hsa-miR-205-5p;NC_000005.10_11919>NC_000005.10_11920
TGM2	7052	hsa_circ_0059354	0.466667	1.51234e-24	15	hsa-miR-27a-3p;hsa-miR-24-3p;hsa-miR-6842-3p;hsa-miR-181c-5p;hsa-miR-9-5p;hsa-miR-449c-5p;hsa-miR-3929;hsa-miR-98-5p;NC_000017.11_32431;hsa-miR-181a-5p;hsa-miR-22-5p;NC_000010.11_22861;hsa-miR-6511b-5p;hsa-miR-215-3p;hsa-miR-4443
PRSS23	11098	hsa_circ_0059354	0.444444	1.51234e-24	15	hsa-miR-30d-5p;hsa-miR-27a-3p;NC_000024.10_38844;hsa-miR-24-3p;hsa-miR-6842-3p;hsa-miR-181c-5p;NC_000002.12_3880;hsa-miR-3929;hsa-miR-98-5p;hsa-miR-4758-3p;NC_000017.11_32431;hsa-miR-181a-5p;hsa-miR-6511b-5p;hsa-miR-215-3p;NC_000011.10_24785
IGFBP5	3488	hsa_circ_0059354	0.511111	1.51234e-24	15	NC_000014.9_29046;hsa-miR-24-3p;hsa-miR-6842-3p;hsa-miR-22-3p;hsa-miR-449c-5p;hsa-miR-3929;hsa-miR-98-5p;hsa-miR-4758-3p;hsa-miR-148a-3p;hsa-miR-22-5p;hsa-miR-6511b-5p;hsa-miR-215-3p;NC_000011.10_24785;NC_000010.11_22861;hsa-miR-4443
SEL1L3	23231	hsa_circ_0045194	0.842105	1.53813e-24	15	NC_000012.12_25887;NC_000020.11_35116;hsa-miR-3155a;hsa-miR-26a-1-3p;NC_000003.12_9133;NC_000022.11_36437;hsa-miR-510-5p;hsa-miR-302b-5p;hsa-miR-7-5p;hsa-miR-3143;hsa-miR-526b-5p;hsa-miR-205-5p;NC_000007.14_17821;hsa-miR-3662;NC_000006.12_15769
ANK2	287	hsa_circ_0045194	0.947368	1.60404e-24	17	NC_000012.12_25887;NC_000020.11_35116;hsa-miR-3155a;hsa-miR-26a-1-3p;NC_000003.12_9133;NC_000022.11_36437;hsa-miR-510-5p;hsa-miR-302b-5p;NC_000005.10_14158;hsa-miR-7-5p;hsa-miR-3143;hsa-miR-92a-1-5p;hsa-miR-526b-5p;hsa-miR-205-5p;NC_000007.14_17821;hsa-miR-3662;NC_000006.12_15769
POLQ	10721	hsa_circ_0012566	0.68	1.83935e-24	14	hsa-miR-30d-5p;hsa-miR-499a-5p;hsa-miR-193a-5p;hsa-miR-24-3p;hsa-miR-181c-5p;hsa-miR-9-5p;hsa-miR-22-3p;hsa-miR-664a-5p;hsa-miR-203a-3p;hsa-miR-181a-5p;hsa-miR-6511b-5p;hsa-miR-22-5p;NC_000011.10_23882;NC_000009.12_21531
SORBS2	8470	hsa_circ_0012566	0.6	1.83935e-24	14	hsa-miR-499a-5p;hsa-miR-193a-5p;hsa-miR-24-3p;NC_000011.10_23882;hsa-miR-22-3p;NC_000016.10_31213;hsa-miR-664a-5p;hsa-miR-203a-3p;hsa-miR-181a-5p;hsa-miR-22-5p;NC_000010.11_22861;NC_000008.11_18787;hsa-miR-6511b-5p;NC_000009.12_21531
LHFPL2	10184	hsa_circ_0076332	0.540541	1.87029e-24	18	hsa-miR-522-3p;hsa-miR-3662;hsa-miR-520c-3p;NC_000003.12_7520;hsa-miR-20a-5p;NC_000010.11_23303;hsa-miR-512-3p;hsa-miR-302b-5p;hsa-miR-3143;hsa-miR-27b-5p;NC_000003.12_8583;NC_000003.12_7973;hsa-miR-372-5p;hsa-miR-5585-3p;NC_000007.14_17821;hsa-miR-17-5p;hsa-miR-34c-5p;hsa-miR-18a-3p
PDE4D	5144	hsa_circ_0052203	0.472222	1.98386e-24	15	NC_000024.10_38844;hsa-miR-6842-3p;hsa-miR-181c-5p;hsa-miR-22-3p;NC_000002.12_3880;hsa-miR-3929;hsa-miR-4435;NC_000017.11_32431;NC_000017.11_32431*;hsa-miR-6511b-5p;hsa-miR-22-5p;NC_000011.10_24785;NC_000010.11_22289;NC_000020.11_34751;hsa-miR-4443
NAV2	89797	hsa_circ_0086498	0.9375	2.00546e-24	13	hsa-miR-30d-5p;NC_000003.12_9115;hsa-miR-27a-3p;hsa-miR-6807-5p;NC_000002.12_3880;hsa-miR-449c-5p;hsa-miR-98-5p;hsa-miR-664a-5p;NC_000012.12_26540;hsa-miR-181a-5p;hsa-miR-22-5p;NC_000010.11_22861;hsa-miR-183-5p
F2RL1	2150	hsa_circ_0076332	0.459459	2.12244e-24	17	NC_000013.11_27627;hsa-miR-3662;hsa-miR-520c-3p;NC_000003.12_7520;NC_000008.11_20037*;hsa-miR-573;NC_000018.10_33742;hsa-miR-20a-5p;NC_000008.11_20037;hsa-miR-3143;NC_000003.12_8583;hsa-miR-372-5p;hsa-miR-5585-3p;hsa-miR-1323;hsa-miR-17-5p;hsa-miR-34c-5p;hsa-miR-18a-3p
SYNPO	11346	hsa_circ_0012566	0.68	2.16492e-24	15	hsa-miR-30d-5p;hsa-miR-193a-5p;NC_000003.12_9115;NC_000016.10_31515;NW_003315954.1_39634;hsa-miR-24-3p;hsa-miR-181c-5p;hsa-miR-9-5p;hsa-miR-449c-5p;hsa-miR-664a-5p;hsa-miR-203a-3p;hsa-miR-181a-5p;hsa-miR-22-5p;NC_000010.11_22861;hsa-miR-6511b-5p
IQGAP3	128239	hsa_circ_0012566	0.68	2.16492e-24	15	hsa-miR-499a-5p;hsa-miR-21-5p;hsa-miR-193a-5p;hsa-miR-24-3p;hsa-miR-181c-5p;hsa-miR-22-3p;hsa-miR-449c-5p;hsa-miR-9-5p;hsa-miR-664a-5p;hsa-miR-181a-5p;hsa-miR-22-5p;NC_000016.10_31515;NC_000008.11_18787;hsa-miR-6511b-5p;NC_000009.12_21531
PARP9	83666	hsa_circ_0006957	0.0816327	2.19725e-24	15	hsa-miR-30d-5p;hsa-miR-155-5p;hsa-miR-27a-3p;NC_000003.12_9115;hsa-miR-215-5p;hsa-miR-659-5p;hsa-miR-449c-5p;hsa-miR-3929;hsa-miR-664a-5p;NC_000012.12_26540;NC_000019.10_34428;hsa-miR-22-5p;NC_000016.10_31515;NC_000011.10_23882;NC_000011.10_24785
TUBGCP3	10426	hsa_circ_0086848	0.428571	2.34601e-24	14	hsa-miR-328-3p;hsa-miR-193a-5p;hsa-miR-24-3p;hsa-miR-659-5p;hsa-miR-9-5p;hsa-miR-449c-5p;hsa-miR-3929;hsa-miR-98-5p;hsa-miR-148a-3p;NC_000017.11_32431;NC_000019.10_34428;hsa-miR-203a-3p;hsa-miR-6511b-5p;hsa-miR-22-5p
RBBP8NL	140893	hsa_circ_0086848	0.428571	2.37534e-24	13	hsa-miR-328-3p;hsa-miR-193a-5p;hsa-miR-6842-3p;NC_000005.10_13790;hsa-miR-22-3p;hsa-miR-449c-5p;hsa-miR-3929;hsa-miR-4435;hsa-miR-148a-3p;hsa-miR-9-5p;hsa-miR-6511b-5p;hsa-miR-22-5p;hsa-miR-4443
HEG1	57493	hsa_circ_0038178	0.678571	2.69902e-24	14	hsa-miR-27a-3p;hsa-miR-24-3p;hsa-miR-6842-3p;hsa-miR-181c-5p;NC_000002.12_3880;hsa-miR-9-5p;hsa-miR-3929;hsa-miR-664a-5p;NC_000017.11_32431;hsa-miR-181a-5p;hsa-miR-642a-5p;hsa-miR-22-5p;hsa-miR-6511b-5p;hsa-miR-4443
HMGB1	3146	hsa_circ_0052203	0.416667	2.70798e-24	14	hsa-miR-26b-5p;hsa-miR-181c-5p;NC_000002.12_3880;hsa-miR-449c-5p;hsa-miR-98-5p;NC_000017.11_32431;NC_000017.11_32431*;hsa-miR-6511b-5p;hsa-miR-642a-5p;hsa-miR-22-5p;NC_000011.10_24785;NC_000020.11_34751;hsa-miR-4443;NC_000009.12_21531
CLIP4	79745	hsa_circ_0053716	0.472727	2.77446e-24	18	NC_000007.14_17824;hsa-miR-520a-3p;hsa-miR-92a-3p;NC_000021.9_35751;NC_000004.12_9958;hsa-miR-302c-5p;hsa-let-7c-5p;NC_000003.12_9133;NC_000010.11_23646;hsa-miR-512-3p;hsa-miR-548i;NC_000018.10_33504*;hsa-miR-302b-5p;hsa-miR-15b-3p;NC_000002.12_3238;hsa-miR-372-5p;hsa-miR-3529-3p;hsa-miR-3662
UBR3	130507	hsa_circ_0076332	0.567568	2.81841e-24	18	hsa-miR-520c-3p;NC_000008.11_20037*;NC_000018.10_33742;hsa-miR-573;hsa-miR-20a-5p;NC_000010.11_23303;hsa-miR-373-5p;NC_000008.11_20037;NC_000012.12_26286;hsa-miR-3143;NC_000003.12_7973;hsa-miR-15b-3p;NC_000006.12_15769;hsa-miR-1323;hsa-miR-372-5p;hsa-miR-17-5p;NC_000013.11_27627;hsa-miR-522-3p
DTX3L	151636	hsa_circ_0059354	0.377778	2.83951e-24	14	hsa-miR-193a-5p;hsa-miR-6842-3p;hsa-miR-181c-5p;hsa-miR-9-5p;hsa-miR-22-3p;hsa-miR-3929;hsa-miR-98-5p;hsa-miR-4758-3p;NC_000017.11_32431;hsa-miR-181a-5p;hsa-miR-22-5p;hsa-miR-215-3p;NC_000010.11_22861;hsa-miR-4443
C19orf57	79173	hsa_circ_0059354	0.355556	2.83951e-24	14	hsa-miR-193a-5p;NC_000014.9_29046;hsa-miR-24-3p;hsa-miR-6842-3p;hsa-miR-9-5p;hsa-miR-22-3p;hsa-miR-3929;hsa-miR-98-5p;hsa-miR-22-5p;hsa-miR-6511b-5p;hsa-miR-215-3p;NC_000011.10_24785;NC_000010.11_22861;hsa-miR-4443
TGFBR2	7048	hsa_circ_0059354	0.466667	2.83951e-24	14	hsa-miR-30d-5p;hsa-miR-27a-3p;hsa-miR-181c-5p;hsa-miR-22-3p;hsa-miR-449c-5p;NC_000016.10_31213;hsa-miR-3929;hsa-miR-9-5p;hsa-miR-98-5p;NC_000017.11_32431;hsa-miR-181a-5p;hsa-miR-6511b-5p;hsa-miR-22-5p;hsa-miR-4443
SOCS3	9021	hsa_circ_0059354	0.4	2.83951e-24	14	hsa-miR-30d-5p;hsa-miR-193a-5p;NC_000014.9_29046;NC_000024.10_38844;hsa-miR-24-3p;hsa-miR-6842-3p;hsa-miR-22-3p;NC_000002.12_3880;hsa-miR-3929;hsa-miR-6511b-5p;hsa-miR-22-5p;NC_000011.10_24785;NC_000010.11_22861;hsa-miR-4443
RAI1	10743	hsa_circ_0059354	0.422222	2.83951e-24	14	hsa-miR-193a-5p;NC_000014.9_29046;hsa-miR-24-3p;hsa-miR-6842-3p;hsa-miR-9-5p;hsa-miR-22-3p;hsa-miR-449c-5p;hsa-miR-3929;hsa-miR-148a-3p;NC_000017.11_32431;hsa-miR-6511b-5p;hsa-miR-22-5p;NC_000011.10_24785;hsa-miR-4443
KALRN	8997	hsa_circ_0038178	0.821429	3.05563e-24	15	hsa-miR-27a-3p;hsa-miR-24-3p;hsa-miR-6842-3p;hsa-miR-181c-5p;NC_000002.12_3880;hsa-miR-9-5p;hsa-miR-3929;hsa-miR-4435;hsa-miR-664a-5p;NC_000012.12_26540;NC_000017.11_32431;hsa-miR-181a-5p;hsa-miR-6511b-5p;hsa-miR-22-5p;hsa-miR-4443
NRP2	8828	hsa_circ_0052203	0.611111	3.4603e-24	15	NC_000014.9_29046;hsa-miR-6842-3p;hsa-miR-22-3p;NC_000002.12_3880;hsa-miR-3929;hsa-miR-4435;hsa-miR-98-5p;NC_000017.11_32431*;hsa-miR-6511b-5p;hsa-miR-22-5p;NC_000010.11_22289;NC_000010.11_22861;NC_000020.11_34751;hsa-miR-4443;NC_000009.12_21531
JADE2	23338	hsa_circ_0012566	0.6	3.54571e-24	14	hsa-miR-30d-5p;hsa-miR-193a-5p;NC_000003.12_9115;hsa-miR-24-3p;hsa-miR-181c-5p;hsa-miR-22-3p;hsa-miR-449c-5p;NC_000016.10_31213;hsa-miR-9-5p;hsa-miR-181a-5p;hsa-miR-22-5p;NC_000016.10_31515;NC_000008.11_18787;hsa-miR-6511b-5p
ZNF519	162655	hsa_circ_0012566	0.64	3.54571e-24	14	hsa-miR-30d-5p;hsa-miR-21-5p;hsa-miR-499a-5p;NC_000003.12_9115;hsa-miR-24-3p;hsa-miR-181c-5p;hsa-miR-9-5p;hsa-miR-22-3p;hsa-miR-664a-5p;hsa-miR-203a-3p;hsa-miR-181a-5p;hsa-miR-6511b-5p;hsa-miR-22-5p;NC_000009.12_21531
KIF19	124602	hsa_circ_0008221	0.0528846	3.74661e-24	15	hsa-miR-328-3p;NC_000014.9_29046;hsa-miR-24-3p;hsa-miR-6842-3p;hsa-miR-9-5p;hsa-miR-22-3p;hsa-miR-3929;NC_000017.11_32431;hsa-miR-6511b-5p;hsa-miR-22-5p;NC_000011.10_24785;NC_000010.11_22861;NC_000020.11_34751;hsa-miR-4443;NC_000009.12_21531
SEMA3C	10512	hsa_circ_0008221	0.0552885	3.74661e-24	15	hsa-miR-328-3p;hsa-miR-499a-5p;hsa-miR-193a-5p;hsa-miR-24-3p;hsa-miR-6842-3p;hsa-miR-181c-5p;hsa-miR-9-5p;NC_000002.12_3880;hsa-miR-3929;hsa-miR-664a-5p;NC_000017.11_32431;hsa-miR-203a-3p;hsa-miR-181a-5p;hsa-miR-22-5p;NC_000009.12_21531
CAPN13	92291	hsa_circ_0008221	0.0576923	3.74661e-24	15	hsa-miR-30d-5p;hsa-miR-27a-3p;hsa-miR-24-3p;hsa-miR-659-5p;hsa-miR-6842-3p;hsa-miR-449c-5p;hsa-miR-3929;hsa-miR-203a-3p;hsa-miR-181a-5p;hsa-miR-6511b-5p;NC_000011.10_23882;NC_000011.10_24785;NC_000020.11_34751;hsa-miR-4443;NC_000009.12_21531
TROAP	10024	hsa_circ_0008221	0.0673077	3.74661e-24	15	hsa-miR-328-3p;hsa-miR-193a-5p;NC_000014.9_29046;hsa-miR-27a-3p;hsa-miR-24-3p;hsa-miR-181c-5p;hsa-miR-9-5p;hsa-miR-449c-5p;hsa-miR-3929;hsa-miR-22-3p;hsa-miR-6511b-5p;hsa-miR-22-5p;NC_000011.10_24785;hsa-miR-4443;NC_000009.12_21531
ARHGEF39	84904	hsa_circ_0008221	0.0817308	3.74661e-24	15	hsa-miR-328-3p;hsa-miR-193a-5p;hsa-miR-21-5p;hsa-miR-215-5p;hsa-miR-24-3p;hsa-miR-6842-3p;NC_000002.12_3880;hsa-miR-3929;NC_000017.11_32431;hsa-miR-6511b-5p;hsa-miR-22-5p;NC_000011.10_24785;NC_000020.11_34751;hsa-miR-4443;NC_000009.12_21531
HMMR	3161	hsa_circ_0059354	0.355556	3.7762e-24	13	hsa-miR-193a-5p;NC_000024.10_38844;hsa-miR-24-3p;hsa-miR-6842-3p;hsa-miR-181c-5p;NC_000002.12_3880;hsa-miR-9-5p;hsa-miR-4758-3p;NC_000017.11_32431;hsa-miR-181a-5p;hsa-miR-6511b-5p;hsa-miR-22-5p;hsa-miR-215-3p
MAP3K2	10746	hsa_circ_0045194	0.894737	4.18509e-24	16	NC_000012.12_25887;NC_000020.11_35116;hsa-miR-3155a;hsa-miR-26a-1-3p;NC_000003.12_9133;NC_000022.11_36437;hsa-miR-302b-5p;hsa-miR-7-5p;hsa-miR-92a-1-5p;hsa-miR-3143;hsa-miR-367-3p;hsa-miR-526b-5p;hsa-miR-205-5p;NC_000007.14_17821;hsa-miR-3662;NC_000006.12_15769
PLEKHA6	22874	hsa_circ_0014557	0.894737	4.19989e-24	14	hsa-miR-30d-5p;hsa-miR-27a-3p;hsa-miR-6842-3p;hsa-miR-9-5p;NC_000002.12_3880;hsa-miR-98-5p;NC_000017.11_32431;NC_000017.11_32431*;NC_000023.11_37419;hsa-miR-181a-5p;hsa-miR-215-3p;hsa-miR-22-5p;hsa-miR-6511b-5p;hsa-miR-3189-3p
SWT1	54823	hsa_circ_0076332	0.486486	4.2071e-24	18	NC_000013.11_27627;NC_000008.11_19445;hsa-miR-302a-5p;hsa-miR-520c-3p;NC_000003.12_7520;NC_000008.11_20037*;hsa-miR-573;NC_000018.10_33742;hsa-miR-20a-5p;NC_000012.12_26286;NC_000003.12_8583;NC_000003.12_7973;hsa-miR-15b-3p;NC_000006.12_15769;hsa-miR-1323;hsa-miR-17-5p;hsa-miR-3662;hsa-miR-522-3p
LHFPL2	10184	hsa_circ_0053716	0.418182	4.22113e-24	18	hsa-miR-520a-3p;hsa-miR-92a-3p;NC_000002.12_3238;hsa-miR-3662;hsa-miR-3155a;hsa-miR-7974;hsa-miR-302c-5p;NC_000003.12_9133;NC_000010.11_23303;NC_000001.11_3101;hsa-miR-512-3p;hsa-miR-510-5p;NC_000018.10_33504*;hsa-miR-302b-5p;hsa-miR-372-5p;hsa-miR-5585-3p;hsa-miR-3529-3p;NC_000007.14_17821
WDR62	284403	hsa_circ_0006957	0.102041	4.23847e-24	15	hsa-miR-193a-5p;NC_000014.9_29046;hsa-miR-27a-3p;NC_000016.10_31515;hsa-miR-24-3p;hsa-miR-659-5p;hsa-miR-9-5p;hsa-miR-449c-5p;NC_000001.11_1021;NC_000019.10_34428;hsa-miR-22-5p;NC_000010.11_22861;NC_000011.10_23882;NC_000011.10_24785;NC_000020.11_34751
IQGAP3	128239	hsa_circ_0038178	0.642857	4.2672e-24	14	hsa-miR-27a-3p;hsa-miR-24-3p;hsa-miR-6842-3p;hsa-miR-181c-5p;NC_000002.12_3880;hsa-miR-9-5p;hsa-miR-3929;hsa-miR-4435;hsa-miR-664a-5p;NC_000012.12_26540;hsa-miR-181a-5p;hsa-miR-6511b-5p;hsa-miR-22-5p;hsa-miR-4443
OAS3	4940	hsa_circ_0038178	0.571429	4.2672e-24	14	hsa-miR-24-3p;hsa-miR-6842-3p;hsa-miR-181c-5p;hsa-miR-9-5p;NC_000002.12_3880;hsa-miR-3929;hsa-miR-4435;hsa-miR-664a-5p;NC_000012.12_26540;NC_000017.11_32431;hsa-miR-6511b-5p;hsa-miR-642a-5p;hsa-miR-22-5p;hsa-miR-4443
TONSL	4796	hsa_circ_0008221	0.0865385	4.27699e-24	16	hsa-miR-328-3p;hsa-miR-193a-5p;hsa-miR-27a-3p;hsa-miR-24-3p;hsa-miR-6842-3p;hsa-miR-22-3p;hsa-miR-449c-5p;NC_000002.12_3880;hsa-miR-664a-5p;NC_000017.11_32431;hsa-miR-22-5p;hsa-miR-6511b-5p;NC_000016.10_31515;NC_000011.10_24785;NC_000010.11_22861;hsa-miR-4443
MYT1L	23040	hsa_circ_0068582	0.535714	4.58264e-24	13	hsa-miR-30d-5p;NC_000003.12_9115;hsa-miR-27a-3p;hsa-miR-24-3p;hsa-miR-181c-5p;hsa-miR-9-5p;NC_000016.10_31213;hsa-miR-664a-5p;hsa-miR-98-5p;hsa-miR-203a-3p;hsa-miR-181a-5p;hsa-miR-22-5p;NC_000011.10_24785
MCM10	55388	hsa_circ_0038178	0.535714	4.60289e-24	13	hsa-miR-27a-3p;hsa-miR-24-3p;hsa-miR-6842-3p;hsa-miR-181c-5p;hsa-miR-9-5p;hsa-miR-3929;hsa-miR-4435;hsa-miR-664a-5p;NC_000012.12_26540;hsa-miR-181a-5p;hsa-miR-6511b-5p;hsa-miR-22-5p;hsa-miR-4443
PDGFRA	5156	hsa_circ_0038178	0.642857	4.60289e-24	13	hsa-miR-27a-3p;hsa-miR-24-3p;hsa-miR-6842-3p;hsa-miR-181c-5p;NC_000002.12_3880;hsa-miR-9-5p;hsa-miR-3929;hsa-miR-4435;hsa-miR-664a-5p;NC_000017.11_32431;hsa-miR-181a-5p;hsa-miR-6511b-5p;hsa-miR-22-5p
DDX51	317781	hsa_circ_0086848	0.408163	4.67663e-24	14	hsa-miR-328-3p;hsa-miR-24-3p;hsa-miR-659-5p;hsa-miR-6842-3p;NC_000005.10_13790;hsa-miR-22-3p;hsa-miR-3929;hsa-miR-4435;hsa-miR-148a-3p;NC_000017.11_32431;NC_000019.10_34428;hsa-miR-6511b-5p;hsa-miR-22-5p;hsa-miR-4443
FANCC	2176	hsa_circ_0086848	0.346939	4.67663e-24	14	hsa-miR-328-3p;hsa-miR-193a-5p;hsa-miR-4443;hsa-miR-24-3p;hsa-miR-659-5p;hsa-miR-6842-3p;hsa-miR-369-3p;hsa-miR-9-5p;hsa-miR-22-3p;hsa-miR-449c-5p;hsa-miR-148a-3p;NC_000017.11_32431;NC_000010.11_22861;hsa-miR-183-5p
KANK2	25959	hsa_circ_0086848	0.489796	4.67663e-24	14	hsa-miR-328-3p;hsa-miR-193a-5p;hsa-miR-24-3p;hsa-miR-6842-3p;NC_000005.10_13790;hsa-miR-9-5p;hsa-miR-22-3p;hsa-miR-3929;hsa-miR-4435;NC_000017.11_32431;hsa-miR-203a-3p;hsa-miR-6511b-5p;hsa-miR-22-5p;hsa-miR-4443
SLC38A1	81539	hsa_circ_0076332	0.540541	5.08825e-24	19	NC_000013.11_27627;NC_000008.11_19445;hsa-miR-3662;hsa-miR-520c-3p;NC_000003.12_7520;NC_000018.10_33742;hsa-miR-20a-5p;hsa-miR-512-3p;hsa-miR-373-5p;hsa-miR-302b-5p;NC_000008.11_20037;hsa-miR-3143;hsa-miR-27b-5p;NC_000003.12_7973;hsa-miR-15b-3p;NC_000006.12_15769;hsa-miR-372-5p;hsa-miR-17-5p;hsa-miR-34c-5p
TLE2	7089	hsa_circ_0052203	0.527778	5.16944e-24	13	NC_000014.9_29046;hsa-miR-6842-3p;hsa-miR-22-3p;hsa-miR-449c-5p;hsa-miR-3929;hsa-miR-4435;hsa-miR-148a-3p;NC_000017.11_32431;NC_000017.11_32431*;hsa-miR-6511b-5p;NC_000011.10_24785;NC_000020.11_34751;hsa-miR-4443
LOC81691	81691	hsa_circ_0052203	0.416667	5.16944e-24	13	NC_000014.9_29046;hsa-miR-6807-5p;NC_000002.12_3880;hsa-miR-22-3p;hsa-miR-3929;hsa-miR-4435;hsa-miR-449c-5p;hsa-miR-98-5p;NC_000017.11_32431;NC_000011.10_24785;NC_000020.11_34751;hsa-miR-4443;NC_000009.12_21531
DIAPH3	81624	hsa_circ_0030467	0.468085	5.23455e-24	13	hsa-miR-499a-5p;hsa-miR-21-5p;hsa-miR-181c-5p;NC_000002.12_3880;hsa-miR-22-3p;NC_000011.10_23807;hsa-miR-3929;hsa-miR-4435;hsa-miR-9-5p;hsa-miR-203a-3p;NC_000023.11_37419;hsa-miR-22-5p;hsa-miR-3189-3p
PBX1	5087	hsa_circ_0030467	0.425532	5.23455e-24	13	hsa-miR-499a-5p;hsa-miR-21-5p;hsa-miR-181c-5p;NC_000002.12_3880;hsa-miR-22-3p;NC_000011.10_23807;hsa-miR-3929;hsa-miR-664a-5p;hsa-miR-9-5p;hsa-miR-203a-3p;hsa-miR-22-5p;hsa-miR-6761-5p;NC_000009.12_21531
DIAPH3	81624	hsa_circ_0014557	0.789474	5.23455e-24	13	hsa-miR-30d-5p;hsa-miR-6842-3p;hsa-miR-9-5p;NC_000002.12_3880;hsa-miR-98-5p;NC_000017.11_32431;NC_000017.11_32431*;NC_000023.11_37419;hsa-miR-181a-5p;hsa-miR-215-3p;hsa-miR-22-5p;hsa-miR-6511b-5p;hsa-miR-3189-3p
ATP2B4	493	hsa_circ_0045194	0.842105	5.3356e-24	16	NC_000012.12_25887;hsa-miR-3155a;hsa-miR-26a-1-3p;NC_000003.12_9133;NC_000022.11_36437;hsa-miR-510-5p;hsa-miR-302b-5p;NC_000005.10_14158;hsa-miR-7-5p;hsa-miR-92a-1-5p;hsa-miR-367-3p;hsa-miR-526b-5p;hsa-miR-205-5p;NC_000007.14_17821;hsa-miR-3662;NC_000006.12_15769
CNTRL	11064	hsa_circ_0052203	0.444444	5.6038e-24	14	NC_000024.10_38844;hsa-miR-6842-3p;hsa-miR-181c-5p;hsa-miR-22-3p;NC_000002.12_3880;hsa-miR-3929;hsa-miR-98-5p;NC_000017.11_32431*;hsa-miR-6511b-5p;hsa-miR-22-5p;NC_000011.10_24785;NC_000010.11_22861;hsa-miR-4443;NC_000009.12_21531
CDC6	990	hsa_circ_0052203	0.388889	5.6038e-24	14	NC_000024.10_38844;hsa-miR-26b-5p;hsa-miR-6842-3p;hsa-miR-181c-5p;hsa-miR-22-3p;hsa-miR-449c-5p;hsa-miR-3929;hsa-miR-98-5p;hsa-miR-148a-3p;NC_000017.11_32431*;hsa-miR-6511b-5p;hsa-miR-642a-5p;hsa-miR-22-5p;NC_000011.10_24785
RFC3	5983	hsa_circ_0052203	0.555556	5.91235e-24	15	NC_000014.9_29046;NC_000024.10_38844;hsa-miR-6842-3p;hsa-miR-449c-5p;hsa-miR-3929;hsa-miR-4435;hsa-miR-98-5p;NC_000017.11_32431;NC_000017.11_32431*;hsa-miR-6511b-5p;hsa-miR-22-5p;NC_000011.10_24785;NC_000010.11_22861;hsa-miR-4443;NC_000009.12_21531
TRIM36	55521	hsa_circ_0059713	0.390244	5.94606e-24	16	NC_000006.12_16700;hsa-miR-92a-3p;NC_000009.12_21957;hsa-miR-7974;hsa-miR-526b-5p;NC_000016.10_31157;NC_000003.12_9133;NC_000010.11_23646;hsa-miR-548i;NC_000018.10_33504*;hsa-miR-371a-5p;NC_000006.12_15769;hsa-miR-1323;NC_000018.10_33037;hsa-miR-3529-3p;hsa-miR-3662
DMBT1	1755	hsa_circ_0059354	0.333333	6.12764e-24	14	hsa-miR-193a-5p;hsa-miR-27a-3p;hsa-miR-24-3p;hsa-miR-9-5p;hsa-miR-22-3p;hsa-miR-3929;hsa-miR-148a-3p;NC_000017.11_32431;hsa-miR-181a-5p;hsa-miR-22-5p;NC_000010.11_22861;hsa-miR-6511b-5p;hsa-miR-215-3p;NC_000011.10_24785
IQGAP3	128239	hsa_circ_0086848	0.55102	6.17186e-24	15	hsa-miR-328-3p;hsa-miR-193a-5p;hsa-miR-4443;hsa-miR-24-3p;hsa-miR-6842-3p;hsa-miR-9-5p;hsa-miR-22-3p;hsa-miR-3929;hsa-miR-449c-5p;hsa-miR-4435;hsa-miR-98-5p;NC_000019.10_34428;hsa-miR-6511b-5p;hsa-miR-22-5p;hsa-miR-183-5p
GMNN	51053	hsa_circ_0012566	0.52	6.60052e-24	13	hsa-miR-30d-5p;hsa-miR-499a-5p;hsa-miR-193a-5p;NC_000003.12_9115;hsa-miR-181c-5p;hsa-miR-449c-5p;hsa-miR-664a-5p;hsa-miR-203a-3p;hsa-miR-181a-5p;hsa-miR-22-5p;NC_000010.11_22861;NC_000008.11_18787;NC_000011.10_23882
GTSE1	51512	hsa_circ_0012566	0.64	6.62882e-24	14	hsa-miR-499a-5p;hsa-miR-193a-5p;NW_003315954.1_39634;hsa-miR-24-3p;hsa-miR-181c-5p;hsa-miR-22-3p;hsa-miR-449c-5p;hsa-miR-9-5p;hsa-miR-181a-5p;hsa-miR-22-5p;NC_000016.10_31515;NC_000008.11_18787;hsa-miR-6511b-5p;NC_000009.12_21531
ZNF608	57507	hsa_circ_0012566	0.6	6.62882e-24	14	hsa-miR-30d-5p;hsa-miR-193a-5p;NC_000003.12_9115;NW_003315954.1_39634;hsa-miR-181c-5p;hsa-miR-9-5p;hsa-miR-664a-5p;hsa-miR-203a-3p;hsa-miR-181a-5p;hsa-miR-22-5p;NC_000010.11_22861;NC_000008.11_18787;NC_000011.10_23882;NC_000009.12_21531
ANK1	286	hsa_circ_0014115	1	6.81318e-24	12	hsa-miR-328-3p;NC_000014.9_29046;hsa-miR-27a-3p;hsa-miR-24-3p;hsa-miR-6842-3p;hsa-miR-22-3p;hsa-miR-449c-5p;hsa-miR-3929;NC_000019.10_34428;hsa-miR-22-5p;NC_000020.11_34751;hsa-miR-183-5p
CENPF	1063	hsa_circ_0038178	0.571429	8.5765e-24	13	hsa-miR-27a-3p;hsa-miR-24-3p;hsa-miR-6842-3p;hsa-miR-181c-5p;hsa-miR-9-5p;hsa-miR-4435;hsa-miR-664a-5p;NC_000017.11_32431;hsa-miR-181a-5p;hsa-miR-642a-5p;hsa-miR-22-5p;hsa-miR-6511b-5p;hsa-miR-4443
PRSS37	136242	hsa_circ_0014557	0.789474	8.6276e-24	13	hsa-miR-30d-5p;hsa-miR-6842-3p;hsa-miR-9-5p;NC_000002.12_3880;hsa-miR-98-5p;NC_000017.11_32431;NC_000017.11_32431*;NC_000023.11_37419;hsa-miR-181a-5p;hsa-miR-22-5p;hsa-miR-6511b-5p;NC_000011.10_23882;hsa-miR-3189-3p
CBX2	84733	hsa_circ_0014557	0.842105	8.6276e-24	13	hsa-miR-30d-5p;hsa-miR-27a-3p;hsa-miR-6842-3p;hsa-miR-9-5p;NC_000002.12_3880;hsa-miR-98-5p;NC_000017.11_32431*;NC_000023.11_37419;hsa-miR-181a-5p;hsa-miR-215-3p;hsa-miR-22-5p;hsa-miR-6511b-5p;hsa-miR-3189-3p
PIWIL2	55124	hsa_circ_0086848	0.408163	9.01184e-24	14	hsa-miR-328-3p;hsa-miR-193a-5p;hsa-miR-24-3p;hsa-miR-659-5p;hsa-miR-6842-3p;hsa-miR-9-5p;hsa-miR-22-3p;hsa-miR-3929;hsa-miR-4435;hsa-miR-6511b-5p;hsa-miR-22-5p;NC_000011.10_23882;NC_000010.11_22861;hsa-miR-183-5p
JADE2	23338	hsa_circ_0086848	0.489796	9.01184e-24	14	hsa-miR-328-3p;hsa-miR-193a-5p;hsa-miR-4443;hsa-miR-24-3p;hsa-miR-6842-3p;hsa-miR-9-5p;hsa-miR-22-3p;hsa-miR-3929;hsa-miR-449c-5p;NC_000017.11_32431;NC_000019.10_34428;hsa-miR-6511b-5p;hsa-miR-22-5p;hsa-miR-183-5p
SP110	3431	hsa_circ_0086848	0.408163	9.01184e-24	14	hsa-miR-328-3p;hsa-miR-193a-5p;hsa-miR-6842-3p;hsa-miR-369-3p;hsa-miR-9-5p;hsa-miR-3929;hsa-miR-4435;hsa-miR-98-5p;NC_000017.11_32431;hsa-miR-203a-3p;hsa-miR-6511b-5p;hsa-miR-22-5p;NC_000010.11_22861;hsa-miR-183-5p
DDX11	1663	hsa_circ_0008221	0.0721154	9.91066e-24	15	hsa-miR-328-3p;hsa-miR-499a-5p;hsa-miR-193a-5p;hsa-miR-27a-3p;NC_000016.10_31515;hsa-miR-24-3p;hsa-miR-659-5p;hsa-miR-22-3p;hsa-miR-449c-5p;NC_000017.11_32431;NC_000019.10_34428;hsa-miR-22-5p;hsa-miR-6511b-5p;NC_000010.11_22861;NC_000011.10_24785
KIF2C	11004	hsa_circ_0008221	0.0528846	9.91066e-24	15	hsa-miR-328-3p;hsa-miR-193a-5p;hsa-miR-21-5p;hsa-miR-27a-3p;hsa-miR-24-3p;hsa-miR-181c-5p;hsa-miR-22-3p;hsa-miR-449c-5p;hsa-miR-664a-5p;NC_000017.11_32431;hsa-miR-181a-5p;hsa-miR-22-5p;NC_000010.11_22861;hsa-miR-6511b-5p;NC_000009.12_21531
MX2	4600	hsa_circ_0008221	0.0480769	9.91066e-24	15	hsa-miR-499a-5p;hsa-miR-21-5p;NC_000003.12_9115;hsa-miR-659-5p;hsa-miR-6842-3p;hsa-miR-181c-5p;hsa-miR-22-3p;hsa-miR-449c-5p;hsa-miR-3929;hsa-miR-9-5p;NC_000017.11_32431;hsa-miR-181a-5p;hsa-miR-6511b-5p;hsa-miR-22-5p;NC_000011.10_24785
MCM5	4174	hsa_circ_0008221	0.0504808	9.91066e-24	15	hsa-miR-193a-5p;NC_000014.9_29046;NC_000016.10_31515;hsa-miR-24-3p;hsa-miR-6842-3p;hsa-miR-181c-5p;hsa-miR-9-5p;hsa-miR-449c-5p;hsa-miR-22-3p;NC_000019.10_34428;hsa-miR-181a-5p;hsa-miR-6511b-5p;hsa-miR-22-5p;NC_000011.10_24785;NC_000009.12_21531
HELLS	3070	hsa_circ_0052203	0.555556	9.91066e-24	15	NC_000024.10_38844;hsa-miR-6842-3p;hsa-miR-181c-5p;NC_000002.12_3880;hsa-miR-3929;hsa-miR-98-5p;NC_000017.11_32431;NC_000017.11_32431*;hsa-miR-6511b-5p;NC_000010.11_22861;NC_000011.10_24785;NC_000010.11_22289;NC_000020.11_34751;hsa-miR-4443;NC_000009.12_21531
TLDC2	140711	hsa_circ_0008221	0.0360577	1.00835e-23	12	hsa-miR-328-3p;NC_000014.9_29046;hsa-miR-6842-3p;hsa-miR-22-3p;hsa-miR-449c-5p;NC_000016.10_31213;hsa-miR-3929;hsa-miR-9-5p;hsa-miR-98-5p;NC_000017.11_32431;hsa-miR-6511b-5p;hsa-miR-22-5p
KIF20B	9585	hsa_circ_0008221	0.0456731	1.00835e-23	12	hsa-miR-155-5p;hsa-miR-215-5p;hsa-miR-659-5p;hsa-miR-181c-5p;NC_000002.12_3880;hsa-miR-369-3p;hsa-miR-98-5p;hsa-miR-203a-3p;hsa-miR-181a-5p;hsa-miR-6511b-5p;hsa-miR-22-5p;NC_000009.12_21531
PTP4A1	7803	hsa_circ_0008221	0.0504808	1.00982e-23	13	hsa-miR-328-3p;hsa-miR-30d-5p;hsa-miR-155-5p;NC_000003.12_9115;hsa-miR-24-3p;hsa-miR-449c-5p;hsa-miR-98-5p;NC_000017.11_32431;hsa-miR-203a-3p;hsa-miR-6511b-5p;hsa-miR-22-5p;NC_000011.10_23882;NC_000011.10_24785
KIF7	374654	hsa_circ_0008221	0.0576923	1.00982e-23	13	hsa-miR-328-3p;hsa-miR-193a-5p;NC_000014.9_29046;hsa-miR-24-3p;hsa-miR-6842-3p;hsa-miR-22-3p;hsa-miR-449c-5p;hsa-miR-3929;hsa-miR-98-5p;NC_000017.11_32431;hsa-miR-6511b-5p;NC_000011.10_24785;NC_000020.11_34751
HMMR	3161	hsa_circ_0008221	0.0408654	1.01706e-23	14	hsa-miR-193a-5p;hsa-miR-499a-5p;hsa-miR-215-5p;hsa-miR-24-3p;hsa-miR-6842-3p;hsa-miR-181c-5p;NC_000002.12_3880;hsa-miR-9-5p;hsa-miR-664a-5p;NC_000017.11_32431;hsa-miR-203a-3p;hsa-miR-181a-5p;hsa-miR-6511b-5p;hsa-miR-22-5p
HMGB3	3149	hsa_circ_0008221	0.0504808	1.01706e-23	14	hsa-miR-328-3p;hsa-miR-155-5p;hsa-miR-27a-3p;hsa-miR-6842-3p;hsa-miR-181c-5p;hsa-miR-9-5p;hsa-miR-664a-5p;hsa-miR-203a-3p;hsa-miR-181a-5p;hsa-miR-22-5p;NC_000016.10_31515;NC_000011.10_24785;NC_000010.11_22861;NC_000009.12_21531
ITFG1	81533	hsa_circ_0076332	0.459459	1.06438e-23	16	NC_000013.11_27627;hsa-miR-3662;hsa-miR-520c-3p;hsa-miR-20a-5p;NC_000010.11_23303;hsa-miR-373-5p;hsa-miR-302b-5p;NC_000012.12_26286;hsa-miR-3143;hsa-miR-15b-3p;NC_000006.12_15769;hsa-miR-1323;hsa-miR-372-5p;hsa-miR-17-5p;hsa-miR-34c-5p;hsa-miR-18a-3p
RALGPS2	55103	hsa_circ_0045194	0.894737	1.08203e-23	16	NC_000012.12_25887;NC_000020.11_35116;hsa-miR-3155a;hsa-miR-26a-1-3p;NC_000003.12_9133;NC_000022.11_36437;hsa-miR-302b-5p;hsa-miR-7-5p;hsa-miR-92a-1-5p;hsa-miR-3143;hsa-miR-367-3p;hsa-miR-526b-5p;hsa-miR-205-5p;NC_000007.14_17821;hsa-miR-3662;NC_000006.12_15769
RTKN2	219790	hsa_circ_0012566	0.64	1.20526e-23	14	hsa-miR-30d-5p;hsa-miR-21-5p;hsa-miR-193a-5p;NC_000003.12_9115;hsa-miR-181c-5p;hsa-miR-9-5p;hsa-miR-664a-5p;hsa-miR-203a-3p;hsa-miR-181a-5p;hsa-miR-22-5p;NC_000010.11_22861;hsa-miR-6511b-5p;NC_000011.10_23882;NC_000009.12_21531
ALDH5A1	7915	hsa_circ_0006957	0.085034	1.26757e-23	14	hsa-miR-30d-5p;hsa-miR-193a-5p;hsa-miR-155-5p;hsa-miR-27a-3p;NC_000014.9_29046;NC_000003.12_9115;hsa-miR-24-3p;hsa-miR-659-5p;hsa-miR-6807-5p;hsa-miR-9-5p;hsa-miR-449c-5p;hsa-miR-22-5p;NC_000010.11_22861;NC_000020.11_34751
STOX1	219736	hsa_circ_0006957	0.0952381	1.26757e-23	14	hsa-miR-155-5p;hsa-miR-27a-3p;hsa-miR-215-5p;hsa-miR-6807-5p;hsa-miR-22-3p;NC_000001.11_1021;NC_000016.10_31213;hsa-miR-3929;hsa-miR-449c-5p;hsa-miR-9-5p;hsa-miR-5701;hsa-miR-664a-5p;hsa-miR-22-5p;NC_000011.10_23882
CDC6	990	hsa_circ_0059354	0.355556	1.26757e-23	14	NC_000024.10_38844;hsa-miR-24-3p;hsa-miR-6842-3p;hsa-miR-181c-5p;hsa-miR-9-5p;hsa-miR-449c-5p;hsa-miR-22-3p;hsa-miR-3929;hsa-miR-98-5p;hsa-miR-148a-3p;hsa-miR-181a-5p;hsa-miR-6511b-5p;hsa-miR-22-5p;NC_000011.10_24785
MCM10	55388	hsa_circ_0059354	0.377778	1.26757e-23	14	hsa-miR-30d-5p;hsa-miR-27a-3p;NC_000024.10_38844;hsa-miR-24-3p;hsa-miR-6842-3p;hsa-miR-181c-5p;hsa-miR-9-5p;hsa-miR-3929;hsa-miR-181a-5p;hsa-miR-6511b-5p;hsa-miR-22-5p;hsa-miR-215-3p;NC_000011.10_24785;hsa-miR-4443
DPYSL3	1809	hsa_circ_0059354	0.444444	1.26757e-23	14	hsa-miR-193a-5p;NC_000014.9_29046;hsa-miR-27a-3p;hsa-miR-24-3p;hsa-miR-6842-3p;hsa-miR-9-5p;hsa-miR-22-3p;hsa-miR-3929;NC_000002.12_3880;hsa-miR-4758-3p;NC_000017.11_32431;hsa-miR-22-5p;hsa-miR-215-3p;NC_000011.10_24785
KIF18A	81930	hsa_circ_0086848	0.306122	1.31846e-23	12	hsa-miR-328-3p;hsa-miR-193a-5p;hsa-miR-24-3p;hsa-miR-659-5p;hsa-miR-369-3p;hsa-miR-22-3p;hsa-miR-9-5p;hsa-miR-3929;NC_000017.11_32431;hsa-miR-203a-3p;hsa-miR-6511b-5p;hsa-miR-22-5p
BUB1B	701	hsa_circ_0086848	0.346939	1.31846e-23	12	hsa-miR-328-3p;hsa-miR-193a-5p;hsa-miR-24-3p;hsa-miR-6842-3p;hsa-miR-659-5p;hsa-miR-369-3p;hsa-miR-22-3p;hsa-miR-449c-5p;hsa-miR-9-5p;hsa-miR-98-5p;hsa-miR-6511b-5p;hsa-miR-22-5p
KIF11	3832	hsa_circ_0030467	0.446809	1.31846e-23	12	hsa-miR-21-5p;NC_000011.10_23807;NC_000002.12_3880;hsa-miR-22-3p;hsa-miR-3929;hsa-miR-4435;hsa-miR-664a-5p;hsa-miR-9-5p;hsa-miR-203a-3p;hsa-miR-22-5p;hsa-miR-6761-5p;NC_000009.12_21531
BAHCC1	57597	hsa_circ_0076332	0.486486	1.32745e-23	18	hsa-miR-522-3p;NC_000013.11_27627;hsa-miR-34c-5p;hsa-miR-520c-3p;hsa-miR-20a-5p;hsa-miR-548j-3p;hsa-miR-512-3p;hsa-miR-373-5p;NC_000012.12_26286;hsa-miR-27b-5p;NC_000003.12_8583;NC_000003.12_7973;hsa-miR-372-5p;NC_000006.12_15769;hsa-miR-1323;hsa-miR-17-5p;NC_000007.14_17821;hsa-miR-18a-3p
ERRFI1	54206	hsa_circ_0076332	0.540541	1.32745e-23	18	NC_000013.11_27627;NC_000008.11_19445;hsa-miR-3662;hsa-miR-520c-3p;NC_000003.12_7520;hsa-miR-20a-5p;hsa-miR-512-3p;hsa-miR-373-5p;NC_000006.12_15769;NC_000008.11_20037;hsa-miR-3143;NC_000003.12_8583;NC_000003.12_7973;hsa-miR-372-5p;hsa-miR-5585-3p;hsa-miR-17-5p;NC_000007.14_17821;hsa-miR-18a-3p
TK1	7083	hsa_circ_0052203	0.416667	1.35158e-23	13	NC_000014.9_29046;hsa-miR-6842-3p;NC_000002.12_3880;hsa-miR-449c-5p;hsa-miR-3929;hsa-miR-98-5p;hsa-miR-148a-3p;hsa-miR-6511b-5p;hsa-miR-642a-5p;NC_000011.10_24785;NC_000010.11_22289;NC_000020.11_34751;NC_000009.12_21531
SMC1A	8243	hsa_circ_0012566	0.68	1.36658e-23	15	hsa-miR-30d-5p;hsa-miR-21-5p;hsa-miR-193a-5p;NW_003315954.1_39634;hsa-miR-24-3p;hsa-miR-181c-5p;hsa-miR-9-5p;hsa-miR-22-3p;hsa-miR-664a-5p;hsa-miR-203a-3p;hsa-miR-181a-5p;hsa-miR-6511b-5p;hsa-miR-22-5p;NC_000011.10_23882;NC_000009.12_21531
LZTS1	11178	hsa_circ_0014557	0.842105	1.39533e-23	13	hsa-miR-30d-5p;hsa-miR-6842-3p;hsa-miR-9-5p;NC_000002.12_3880;hsa-miR-98-5p;NC_000017.11_32431;NC_000017.11_32431*;NC_000023.11_37419;hsa-miR-22-5p;hsa-miR-215-3p;hsa-miR-6511b-5p;hsa-miR-1301-3p;hsa-miR-3189-3p
CIT	11113	hsa_circ_0014557	0.789474	1.39533e-23	13	hsa-miR-30d-5p;hsa-miR-27a-3p;hsa-miR-6842-3p;hsa-miR-9-5p;hsa-miR-98-5p;NC_000017.11_32431*;NC_000023.11_37419;hsa-miR-181a-5p;hsa-miR-215-3p;hsa-miR-22-5p;NC_000011.10_23882;hsa-miR-6511b-5p;hsa-miR-3189-3p
PLCE1	51196	hsa_circ_0014557	0.789474	1.39533e-23	13	hsa-miR-30d-5p;hsa-miR-27a-3p;hsa-miR-6842-3p;hsa-miR-9-5p;NC_000002.12_3880;hsa-miR-98-5p;NC_000017.11_32431;NC_000023.11_37419;hsa-miR-181a-5p;hsa-miR-215-3p;hsa-miR-22-5p;hsa-miR-6511b-5p;hsa-miR-3189-3p
PLEKHH2	130271	hsa_circ_0076332	0.486486	1.42821e-23	17	hsa-miR-522-3p;NC_000008.11_19445;hsa-miR-520c-3p;NC_000003.12_7520;NC_000018.10_33742;hsa-miR-573;hsa-miR-20a-5p;hsa-miR-373-5p;NC_000008.11_20037;NC_000012.12_26286;hsa-miR-3143;NC_000003.12_7973;hsa-miR-15b-3p;NC_000006.12_15769;hsa-miR-372-5p;hsa-miR-17-5p;hsa-miR-18a-3p
IQGAP3	128239	hsa_circ_0014115	0.923077	1.47374e-23	12	hsa-miR-328-3p;NC_000014.9_29046;hsa-miR-27a-3p;hsa-miR-24-3p;hsa-miR-6842-3p;hsa-miR-22-3p;hsa-miR-449c-5p;hsa-miR-3929;NC_000019.10_34428;hsa-miR-22-5p;NC_000020.11_34751;hsa-miR-183-5p
UNG	7374	hsa_circ_0086848	0.326531	1.51318e-23	13	hsa-miR-193a-5p;hsa-miR-659-5p;hsa-miR-6842-3p;NC_000005.10_13790;hsa-miR-22-3p;hsa-miR-449c-5p;hsa-miR-3929;hsa-miR-4435;NC_000017.11_32431;hsa-miR-6511b-5p;hsa-miR-22-5p;NC_000010.11_22861;hsa-miR-183-5p
MCM3	4172	hsa_circ_0086848	0.387755	1.51318e-23	13	hsa-miR-328-3p;hsa-miR-193a-5p;hsa-miR-659-5p;hsa-miR-6842-3p;hsa-miR-369-3p;hsa-miR-9-5p;hsa-miR-22-3p;hsa-miR-4435;hsa-miR-148a-3p;NC_000017.11_32431;NC_000019.10_34428;hsa-miR-22-5p;hsa-miR-4443
BUB1	699	hsa_circ_0012566	0.56	1.51318e-23	13	hsa-miR-21-5p;NW_003315954.1_39634;hsa-miR-24-3p;hsa-miR-9-5p;hsa-miR-449c-5p;hsa-miR-664a-5p;hsa-miR-203a-3p;hsa-miR-22-5p;hsa-miR-6511b-5p;NC_000010.11_22861;NC_000008.11_18787;NC_000011.10_23882;NC_000009.12_21531
KCNAB2	8514	hsa_circ_0038178	0.607143	1.55167e-23	13	hsa-miR-27a-3p;hsa-miR-24-3p;hsa-miR-6842-3p;hsa-miR-9-5p;hsa-miR-3929;hsa-miR-4435;hsa-miR-664a-5p;NC_000017.11_32431;hsa-miR-181a-5p;hsa-miR-642a-5p;hsa-miR-6511b-5p;hsa-miR-1301-3p;hsa-miR-4443
PIWIL2	55124	hsa_circ_0038178	0.571429	1.55167e-23	13	hsa-miR-27a-3p;hsa-miR-24-3p;hsa-miR-6842-3p;hsa-miR-181c-5p;hsa-miR-9-5p;hsa-miR-3929;hsa-miR-4435;NC_000012.12_26540;hsa-miR-181a-5p;hsa-miR-642a-5p;hsa-miR-22-5p;hsa-miR-6511b-5p;hsa-miR-1301-3p
SLC16A4	9122	hsa_circ_0059713	0.439024	1.67593e-23	18	hsa-miR-302a-5p;hsa-miR-3662;NC_000009.12_21957;hsa-miR-526b-5p;hsa-miR-573;hsa-miR-20a-5p;NC_000003.12_9133;NC_000001.11_2997;NC_000011.10_25384;hsa-miR-373-5p;hsa-miR-548i;hsa-miR-7-5p;NC_000009.12_21925;NC_000005.10_11919>NC_000005.10_11920;NC_000006.12_15769;NC_000022.11_36437;NC_000018.10_33037;hsa-miR-34c-5p
RSAD2	91543	hsa_circ_0086848	0.346939	1.68418e-23	14	hsa-miR-328-3p;hsa-miR-193a-5p;hsa-miR-4443;hsa-miR-24-3p;hsa-miR-6842-3p;hsa-miR-369-3p;hsa-miR-9-5p;hsa-miR-449c-5p;hsa-miR-98-5p;hsa-miR-4435;NC_000017.11_32431;hsa-miR-203a-3p;hsa-miR-22-5p;hsa-miR-183-5p
OAS2	4939	hsa_circ_0086848	0.428571	1.68418e-23	14	hsa-miR-193a-5p;hsa-miR-24-3p;hsa-miR-6842-3p;NC_000005.10_13790;hsa-miR-9-5p;hsa-miR-449c-5p;hsa-miR-4435;hsa-miR-148a-3p;NC_000017.11_32431;hsa-miR-203a-3p;hsa-miR-6511b-5p;hsa-miR-22-5p;NC_000010.11_22861;hsa-miR-4443
KIF4A	24137	hsa_circ_0086848	0.346939	1.68418e-23	14	hsa-miR-328-3p;hsa-miR-4443;hsa-miR-6842-3p;hsa-miR-9-5p;hsa-miR-22-3p;hsa-miR-449c-5p;hsa-miR-4435;hsa-miR-148a-3p;NC_000017.11_32431;NC_000019.10_34428;hsa-miR-22-5p;hsa-miR-6511b-5p;NC_000010.11_22861;hsa-miR-183-5p
MAP2	4133	hsa_circ_0045194	0.842105	1.70443e-23	16	NC_000012.12_25887;NC_000020.11_35116;hsa-miR-3155a;hsa-miR-26a-1-3p;NC_000003.12_9133;NC_000022.11_36437;hsa-miR-510-5p;hsa-miR-302b-5p;hsa-miR-7-5p;hsa-miR-3143;hsa-miR-367-3p;hsa-miR-526b-5p;hsa-miR-205-5p;NC_000007.14_17821;hsa-miR-3662;NC_000006.12_15769
C1orf116	79098	hsa_circ_0059713	0.463415	1.73678e-23	19	NC_000006.12_16700;hsa-miR-3662;NC_000009.12_21957;NC_000021.9_35751;hsa-miR-7974;hsa-miR-573;hsa-miR-526b-5p;NC_000001.11_2997;NC_000016.10_31157;NC_000011.10_25384;hsa-miR-373-5p;hsa-miR-582-5p;NC_000009.12_21925;NC_000005.10_11919>NC_000005.10_11920;NC_000002.12_3238;hsa-miR-205-5p;NC_000018.10_33037;hsa-miR-372-5p;hsa-miR-34c-5p
KALRN	8997	hsa_circ_0086498	1	1.74437e-23	13	hsa-miR-30d-5p;NC_000003.12_9115;hsa-miR-27a-3p;hsa-miR-6807-5p;NC_000002.12_3880;hsa-miR-449c-5p;hsa-miR-98-5p;hsa-miR-664a-5p;NC_000012.12_26540;hsa-miR-181a-5p;hsa-miR-22-5p;NC_000010.11_22861;hsa-miR-183-5p
BTG1	694	hsa_circ_0053716	0.4	2.05679e-23	18	NC_000007.14_17824;hsa-miR-520a-3p;hsa-miR-92a-3p;NC_000002.12_3238;hsa-miR-3662;hsa-miR-3155a;hsa-miR-7974;hsa-miR-302c-5p;NC_000010.11_23646;hsa-miR-548i;NC_000018.10_33504*;hsa-miR-92a-1-5p;hsa-miR-510-5p;hsa-miR-302b-5p;hsa-miR-5585-3p;hsa-miR-1323;hsa-miR-3529-3p;NC_000007.14_17821
TGFA	7039	hsa_circ_0059713	0.463415	2.097e-23	17	NC_000006.12_16700;hsa-miR-3662;NC_000009.12_21957;NC_000021.9_35751;hsa-miR-526b-5p;NC_000011.10_25384;NC_000010.11_23646;hsa-miR-548i;NC_000018.10_33504*;hsa-miR-582-5p;hsa-miR-7-5p;NC_000003.12_7276;NC_000002.12_3238;hsa-miR-205-5p;NC_000018.10_33037;hsa-miR-34c-5p;NC_000006.12_15769
FIGNL1	63979	hsa_circ_0012566	0.56	2.13643e-23	14	hsa-miR-499a-5p;hsa-miR-21-5p;hsa-miR-193a-5p;NW_003315954.1_39634;hsa-miR-181c-5p;hsa-miR-22-3p;hsa-miR-449c-5p;hsa-miR-203a-3p;hsa-miR-181a-5p;hsa-miR-6511b-5p;hsa-miR-22-5p;NC_000008.11_18787;NC_000011.10_23882;NC_000009.12_21531
DIAPH3	81624	hsa_circ_0012566	0.6	2.13643e-23	14	hsa-miR-30d-5p;hsa-miR-21-5p;hsa-miR-499a-5p;NC_000003.12_9115;NC_000016.10_31515;hsa-miR-181c-5p;hsa-miR-22-3p;hsa-miR-9-5p;hsa-miR-203a-3p;hsa-miR-181a-5p;hsa-miR-22-5p;NC_000010.11_22861;NC_000008.11_18787;hsa-miR-6511b-5p
CASC5		hsa_circ_0012566	0.64	2.13643e-23	14	hsa-miR-30d-5p;hsa-miR-21-5p;hsa-miR-499a-5p;hsa-miR-193a-5p;NC_000003.12_9115;hsa-miR-24-3p;hsa-miR-181c-5p;hsa-miR-9-5p;hsa-miR-664a-5p;hsa-miR-203a-3p;hsa-miR-181a-5p;hsa-miR-6511b-5p;hsa-miR-22-5p;NC_000009.12_21531
KCNAB2	8514	hsa_circ_0052203	0.555556	2.15104e-23	14	NC_000014.9_29046;hsa-miR-6842-3p;hsa-miR-22-3p;hsa-miR-449c-5p;hsa-miR-3929;hsa-miR-4435;NC_000017.11_32431;NC_000017.11_32431*;hsa-miR-6511b-5p;hsa-miR-642a-5p;NC_000011.10_24785;NC_000010.11_22289;hsa-miR-4443;NC_000009.12_21531
JADE2	23338	hsa_circ_0052203	0.472222	2.15104e-23	14	NC_000014.9_29046;hsa-miR-6842-3p;hsa-miR-181c-5p;hsa-miR-22-3p;hsa-miR-449c-5p;hsa-miR-3929;NC_000002.12_3880;NC_000017.11_32431;hsa-miR-6511b-5p;hsa-miR-22-5p;NC_000011.10_24785;NC_000010.11_22289;NC_000020.11_34751;hsa-miR-4443
ALDH7A1	501	hsa_circ_0052203	0.527778	2.15104e-23	14	hsa-miR-26b-5p;hsa-miR-6842-3p;hsa-miR-181c-5p;NC_000002.12_3880;hsa-miR-3929;hsa-miR-4435;hsa-miR-98-5p;hsa-miR-148a-3p;NC_000017.11_32431;hsa-miR-22-5p;NC_000011.10_24785;NC_000020.11_34751;hsa-miR-4443;NC_000009.12_21531
FIGN	55137	hsa_circ_0030467	0.531915	2.21742e-23	13	hsa-miR-499a-5p;hsa-miR-21-5p;hsa-miR-181c-5p;NC_000002.12_3880;hsa-miR-22-3p;NC_000011.10_23807;hsa-miR-3929;hsa-miR-4435;hsa-miR-664a-5p;hsa-miR-9-5p;hsa-miR-203a-3p;hsa-miR-22-5p;NC_000009.12_21531
NCKAP1	10787	hsa_circ_0076332	0.486486	2.2259e-23	17	NC_000008.11_19445;hsa-miR-520c-3p;NC_000003.12_7520;NC_000008.11_20037*;hsa-miR-573;hsa-miR-20a-5p;hsa-miR-373-5p;NC_000012.12_26286;hsa-miR-3143;NC_000003.12_7973;hsa-miR-372-5p;NC_000006.12_15769;hsa-miR-1323;NC_000007.14_17821;hsa-miR-17-5p;hsa-miR-34c-5p;hsa-miR-522-3p
DDX51	317781	hsa_circ_0059354	0.355556	2.52497e-23	14	NC_000014.9_29046;hsa-miR-27a-3p;hsa-miR-24-3p;hsa-miR-6842-3p;hsa-miR-22-3p;hsa-miR-3929;hsa-miR-4758-3p;hsa-miR-148a-3p;NC_000017.11_32431;hsa-miR-181a-5p;hsa-miR-6511b-5p;hsa-miR-22-5p;NC_000011.10_24785;hsa-miR-4443
CENPF	1063	hsa_circ_0059354	0.488889	2.52497e-23	14	hsa-miR-193a-5p;NC_000014.9_29046;hsa-miR-27a-3p;hsa-miR-24-3p;hsa-miR-6842-3p;hsa-miR-181c-5p;hsa-miR-9-5p;NC_000017.11_32431;hsa-miR-181a-5p;hsa-miR-22-5p;hsa-miR-215-3p;hsa-miR-6511b-5p;NC_000011.10_24785;hsa-miR-4443
DENND2C	163259	hsa_circ_0059713	0.487805	2.57366e-23	18	NC_000006.12_16700;hsa-miR-302a-5p;NC_000021.9_35751;hsa-miR-526b-5p;hsa-miR-573;NC_000016.10_31157;NC_000003.12_9133;hsa-miR-20a-5p;NC_000022.11_36437;hsa-miR-7-5p;hsa-miR-582-5p;NC_000003.12_7276;hsa-miR-372-5p;NC_000002.12_3238;hsa-miR-205-5p;NC_000018.10_33037;hsa-miR-3529-3p;NC_000006.12_15769
ITPR1	3708	hsa_circ_0026725	0.772727	2.59524e-23	16	NC_000019.10_34542;NC_000013.11_27257;NC_000009.12_21574;NC_000011.10_24389*;hsa-let-7c-5p;hsa-miR-573;NC_000011.10_25384;NC_000001.11_2997;hsa-miR-514a-3p;NC_000001.11_3101;NC_000010.11_23303;NC_000017.11_32936;hsa-miR-512-3p;NC_000007.14_18366;hsa-miR-205-5p;NC_000005.10_11919>NC_000005.10_11920
DAB2	1601	hsa_circ_0030467	0.382979	2.63312e-23	12	hsa-miR-499a-5p;NC_000011.10_23807;NC_000002.12_3880;hsa-miR-22-3p;hsa-miR-3929;hsa-miR-664a-5p;hsa-miR-9-5p;hsa-miR-203a-3p;NC_000023.11_37419;hsa-miR-22-5p;hsa-miR-3189-3p;NC_000009.12_21531
OLFML3	56944	hsa_circ_0052203	0.388889	2.63312e-23	12	NC_000014.9_29046;hsa-miR-6807-5p;hsa-miR-22-3p;NC_000002.12_3880;hsa-miR-4435;NC_000017.11_32431;hsa-miR-642a-5p;hsa-miR-22-5p;NC_000011.10_24785;NC_000010.11_22289;NC_000010.11_22861;hsa-miR-4443
NAV2	89797	hsa_circ_0063772	0.9375	2.77525e-23	13	hsa-miR-30d-5p;hsa-miR-21-5p;NC_000003.12_9115;hsa-miR-27a-3p;hsa-miR-24-3p;NC_000002.12_3880;hsa-miR-449c-5p;hsa-miR-3929;hsa-miR-664a-5p;NC_000012.12_26540;hsa-miR-6511b-5p;hsa-miR-22-5p;NC_000020.11_34751
RACGAP1	29127	hsa_circ_0059354	0.333333	2.80764e-23	13	hsa-miR-24-3p;hsa-miR-181c-5p;hsa-miR-22-3p;hsa-miR-449c-5p;hsa-miR-3929;hsa-miR-4758-3p;hsa-miR-148a-3p;hsa-miR-9-5p;NC_000017.11_32431;hsa-miR-181a-5p;hsa-miR-6511b-5p;hsa-miR-22-5p;hsa-miR-215-3p
IGFBP4	3487	hsa_circ_0059354	0.333333	2.80764e-23	13	hsa-miR-193a-5p;NC_000014.9_29046;hsa-miR-24-3p;hsa-miR-6842-3p;hsa-miR-22-3p;hsa-miR-449c-5p;hsa-miR-3929;hsa-miR-4758-3p;NC_000017.11_32431;hsa-miR-181a-5p;hsa-miR-6511b-5p;NC_000010.11_22861;NC_000011.10_24785
CLHC1	130162	hsa_circ_0053716	0.472727	2.99035e-23	18	hsa-miR-3662;hsa-miR-3155a;NC_000021.9_35751;hsa-miR-7974;hsa-miR-302c-5p;hsa-let-7c-5p;NC_000003.12_9133;NC_000001.11_3101;hsa-miR-92a-1-5p;NC_000009.12_20733;hsa-miR-302b-5p;NC_000008.11_20037;hsa-miR-15b-3p;NC_000002.12_3238;hsa-miR-1323;hsa-miR-372-5p;hsa-miR-3529-3p;NC_000007.14_17821
CDCA2	157313	hsa_circ_0086848	0.387755	3.06107e-23	14	hsa-miR-193a-5p;hsa-miR-24-3p;hsa-miR-6842-3p;NC_000005.10_13790;hsa-miR-9-5p;hsa-miR-22-3p;hsa-miR-3929;hsa-miR-369-3p;hsa-miR-98-5p;NC_000017.11_32431;hsa-miR-203a-3p;hsa-miR-6511b-5p;hsa-miR-22-5p;hsa-miR-183-5p
TRMT5	57570	hsa_circ_0086848	0.306122	3.06107e-23	14	hsa-miR-193a-5p;hsa-miR-24-3p;hsa-miR-6842-3p;hsa-miR-369-3p;hsa-miR-9-5p;hsa-miR-22-3p;hsa-miR-449c-5p;hsa-miR-98-5p;hsa-miR-148a-3p;NC_000017.11_32431;hsa-miR-203a-3p;hsa-miR-22-5p;NC_000011.10_23882;hsa-miR-183-5p
RTKN2	219790	hsa_circ_0086848	0.326531	3.06107e-23	14	hsa-miR-328-3p;hsa-miR-193a-5p;hsa-miR-6842-3p;hsa-miR-369-3p;hsa-miR-9-5p;hsa-miR-3929;hsa-miR-98-5p;NC_000017.11_32431;hsa-miR-203a-3p;hsa-miR-6511b-5p;hsa-miR-22-5p;NC_000011.10_23882;NC_000010.11_22861;hsa-miR-183-5p
ICMT	23463	hsa_circ_0086848	0.428571	3.06107e-23	14	hsa-miR-193a-5p;hsa-miR-6842-3p;hsa-miR-9-5p;hsa-miR-22-3p;hsa-miR-3929;hsa-miR-4435;hsa-miR-98-5p;NC_000017.11_32431;NC_000019.10_34428;hsa-miR-203a-3p;hsa-miR-22-5p;hsa-miR-6511b-5p;NC_000010.11_22861;hsa-miR-4443
TMEM123	114908	hsa_circ_0076332	0.486486	3.20349e-23	16	NC_000008.11_19445;hsa-miR-3662;hsa-miR-520c-3p;NC_000008.11_20037*;hsa-miR-20a-5p;hsa-miR-573;hsa-miR-512-3p;hsa-miR-373-5p;NC_000012.12_26286;hsa-miR-3143;hsa-miR-372-5p;NC_000006.12_15769;hsa-miR-1323;hsa-miR-17-5p;NC_000007.14_17821;hsa-miR-522-3p
UNG	7374	hsa_circ_0052203	0.361111	3.29072e-23	13	hsa-miR-6842-3p;hsa-miR-22-3p;hsa-miR-449c-5p;hsa-miR-3929;hsa-miR-4435;NC_000002.12_3880;NC_000017.11_32431;NC_000017.11_32431*;hsa-miR-6511b-5p;hsa-miR-22-5p;NC_000011.10_24785;NC_000010.11_22861;NC_000020.11_34751
SUV39H1	6839	hsa_circ_0052203	0.444444	3.29072e-23	13	NC_000014.9_29046;hsa-miR-6842-3p;NC_000002.12_3880;hsa-miR-449c-5p;hsa-miR-98-5p;hsa-miR-4435;NC_000017.11_32431*;hsa-miR-6511b-5p;hsa-miR-642a-5p;NC_000010.11_22861;NC_000011.10_24785;NC_000010.11_22289;hsa-miR-4443
NREP	9315	hsa_circ_0008221	0.0408654	3.36189e-23	14	hsa-miR-27a-3p;hsa-miR-24-3p;hsa-miR-6842-3p;hsa-miR-181c-5p;NC_000002.12_3880;hsa-miR-449c-5p;hsa-miR-9-5p;hsa-miR-664a-5p;hsa-miR-98-5p;hsa-miR-181a-5p;hsa-miR-22-5p;NC_000011.10_23882;NC_000011.10_24785;NC_000010.11_22861
TLE2	7089	hsa_circ_0008221	0.0721154	3.36189e-23	14	hsa-miR-328-3p;NC_000014.9_29046;hsa-miR-6842-3p;hsa-miR-369-3p;hsa-miR-22-3p;hsa-miR-449c-5p;hsa-miR-3929;NC_000017.11_32431;NC_000019.10_34428;hsa-miR-6511b-5p;NC_000016.10_31515;NC_000011.10_24785;NC_000020.11_34751;hsa-miR-4443
RAP2A	5911	hsa_circ_0076332	0.486486	3.42865e-23	17	NC_000013.11_27627;NC_000008.11_19445;hsa-miR-3662;NC_000003.12_7520;hsa-miR-20a-5p;NC_000010.11_23303;hsa-miR-512-3p;hsa-miR-373-5p;NC_000008.11_20037;hsa-miR-3143;hsa-miR-15b-3p;hsa-miR-5585-3p;hsa-miR-1323;hsa-miR-372-5p;hsa-miR-17-5p;hsa-miR-34c-5p;NC_000006.12_15769
KNTC1	9735	hsa_circ_0086848	0.326531	3.46772e-23	13	hsa-miR-193a-5p;hsa-miR-24-3p;hsa-miR-6842-3p;hsa-miR-369-3p;hsa-miR-9-5p;hsa-miR-22-3p;hsa-miR-3929;hsa-miR-4435;hsa-miR-98-5p;hsa-miR-203a-3p;hsa-miR-6511b-5p;hsa-miR-22-5p;hsa-miR-4443
BUB1	699	hsa_circ_0086848	0.306122	3.46772e-23	13	hsa-miR-24-3p;hsa-miR-659-5p;hsa-miR-6842-3p;hsa-miR-369-3p;hsa-miR-9-5p;hsa-miR-449c-5p;hsa-miR-4435;NC_000017.11_32431;hsa-miR-203a-3p;hsa-miR-6511b-5p;hsa-miR-22-5p;NC_000011.10_23882;NC_000010.11_22861
LYPD6	130574	hsa_circ_0086848	0.306122	3.46772e-23	13	hsa-miR-24-3p;hsa-miR-659-5p;hsa-miR-6842-3p;NC_000005.10_13790;hsa-miR-9-5p;hsa-miR-22-3p;hsa-miR-3929;hsa-miR-4435;hsa-miR-98-5p;NC_000019.10_34428;hsa-miR-203a-3p;hsa-miR-6511b-5p;NC_000010.11_22861
KIF19	124602	hsa_circ_0086848	0.346939	3.46772e-23	13	hsa-miR-328-3p;hsa-miR-4443;hsa-miR-24-3p;hsa-miR-6842-3p;NC_000005.10_13790;hsa-miR-9-5p;hsa-miR-22-3p;hsa-miR-3929;NC_000017.11_32431;hsa-miR-22-5p;hsa-miR-6511b-5p;NC_000010.11_22861;hsa-miR-183-5p
C17orf53	78995	hsa_circ_0086848	0.326531	3.46772e-23	13	hsa-miR-193a-5p;hsa-miR-659-5p;hsa-miR-6842-3p;NC_000005.10_13790;hsa-miR-22-3p;hsa-miR-449c-5p;hsa-miR-3929;hsa-miR-4435;hsa-miR-98-5p;NC_000017.11_32431;hsa-miR-6511b-5p;hsa-miR-22-5p;hsa-miR-4443
CPEB4	80315	hsa_circ_0059713	0.463415	3.54261e-23	19	NC_000006.12_16700;hsa-miR-3662;hsa-miR-7974;hsa-miR-573;NC_000016.10_31157;NC_000003.12_9133;hsa-miR-20a-5p;NC_000010.11_23646;NC_000011.10_25384;hsa-miR-373-5p;hsa-miR-582-5p;NC_000003.12_7276;NC_000009.12_21925;NC_000002.12_3238;hsa-miR-1323;NC_000018.10_33037;hsa-miR-372-5p;hsa-miR-34c-5p;NC_000006.12_15769
CBX2	84733	hsa_circ_0012566	0.6	3.69981e-23	14	hsa-miR-30d-5p;hsa-miR-193a-5p;NC_000003.12_9115;hsa-miR-24-3p;hsa-miR-181c-5p;hsa-miR-9-5p;hsa-miR-22-3p;hsa-miR-203a-3p;hsa-miR-181a-5p;hsa-miR-22-5p;NC_000010.11_22861;NC_000008.11_18787;hsa-miR-6511b-5p;NC_000009.12_21531
ROR1	4919	hsa_circ_0052203	0.472222	4.0185e-23	14	NC_000014.9_29046;NC_000024.10_38844;hsa-miR-6842-3p;hsa-miR-181c-5p;hsa-miR-22-3p;NC_000002.12_3880;hsa-miR-3929;hsa-miR-4435;hsa-miR-98-5p;NC_000017.11_32431*;hsa-miR-22-5p;NC_000011.10_24785;NC_000010.11_22861;hsa-miR-4443
EMP1	2012	hsa_circ_0059713	0.390244	4.50045e-23	15	NC_000002.12_3238;hsa-miR-573;NC_000003.12_9133;hsa-miR-373-5p;hsa-miR-548i;hsa-miR-7-5p;hsa-miR-582-5p;NC_000003.12_7276;NC_000009.12_21925;hsa-miR-1323;hsa-miR-526b-5p;NC_000022.11_36437;NC_000018.10_33037;hsa-miR-34c-5p;NC_000006.12_15769
MAP3K1	4214	hsa_circ_0006957	0.0816327	4.50045e-23	15	hsa-miR-193a-5p;hsa-miR-21-5p;hsa-miR-155-5p;hsa-miR-27a-3p;NC_000014.9_29046;hsa-miR-215-5p;hsa-miR-24-3p;hsa-miR-659-5p;hsa-miR-22-3p;hsa-miR-9-5p;hsa-miR-3929;NC_000012.12_26540;hsa-miR-22-5p;NC_000011.10_23882;NC_000011.10_24785
INCENP	3619	hsa_circ_0006957	0.0816327	4.50045e-23	15	hsa-miR-30d-5p;hsa-miR-193a-5p;hsa-miR-155-5p;NC_000014.9_29046;NC_000003.12_9115;hsa-miR-215-5p;hsa-miR-24-3p;hsa-miR-6807-5p;hsa-miR-22-3p;hsa-miR-449c-5p;hsa-miR-9-5p;hsa-miR-22-5p;NC_000010.11_22861;NC_000011.10_23882;NC_000020.11_34751
ROBO1	6091	hsa_circ_0038178	0.535714	4.69878e-23	13	hsa-miR-27a-3p;hsa-miR-24-3p;hsa-miR-6842-3p;hsa-miR-181c-5p;NC_000002.12_3880;hsa-miR-3929;hsa-miR-4435;hsa-miR-664a-5p;NC_000017.11_32431;hsa-miR-6511b-5p;hsa-miR-642a-5p;hsa-miR-22-5p;hsa-miR-4443
NCAPD3	23310	hsa_circ_0038178	0.607143	4.69878e-23	13	hsa-miR-27a-3p;hsa-miR-24-3p;hsa-miR-6842-3p;hsa-miR-181c-5p;NC_000002.12_3880;hsa-miR-9-5p;hsa-miR-3929;hsa-miR-4435;NC_000012.12_26540;NC_000017.11_32431;hsa-miR-181a-5p;hsa-miR-6511b-5p;hsa-miR-22-5p
INPP5D	3635	hsa_circ_0059354	0.422222	4.86205e-23	14	hsa-miR-193a-5p;NC_000014.9_29046;NC_000024.10_38844;hsa-miR-6842-3p;hsa-miR-9-5p;hsa-miR-449c-5p;hsa-miR-22-3p;NC_000002.12_3880;hsa-miR-4758-3p;NC_000017.11_32431;hsa-miR-6511b-5p;hsa-miR-22-5p;NC_000011.10_24785;NC_000010.11_22861
TONSL	4796	hsa_circ_0059354	0.444444	4.86205e-23	14	hsa-miR-193a-5p;hsa-miR-27a-3p;hsa-miR-24-3p;hsa-miR-6842-3p;hsa-miR-22-3p;hsa-miR-449c-5p;NC_000002.12_3880;hsa-miR-148a-3p;NC_000017.11_32431;hsa-miR-6511b-5p;hsa-miR-22-5p;NC_000011.10_24785;NC_000010.11_22861;hsa-miR-4443
PIWIL2	55124	hsa_circ_0059354	0.422222	4.86205e-23	14	hsa-miR-30d-5p;hsa-miR-193a-5p;hsa-miR-27a-3p;hsa-miR-24-3p;hsa-miR-6842-3p;hsa-miR-181c-5p;hsa-miR-22-3p;hsa-miR-9-5p;hsa-miR-3929;hsa-miR-181a-5p;hsa-miR-22-5p;NC_000010.11_22861;hsa-miR-6511b-5p;NC_000011.10_24785
NR5A2	2494	hsa_circ_0076332	0.486486	5.22282e-23	17	NC_000008.11_19445;hsa-miR-34c-5p;hsa-miR-3662;hsa-miR-520c-3p;NC_000018.10_33742;hsa-miR-573;NC_000010.11_23303;hsa-miR-512-3p;hsa-miR-373-5p;NC_000008.11_20037;hsa-miR-3143;hsa-miR-27b-5p;NC_000003.12_7973;NC_000006.12_15769;hsa-miR-372-5p;NC_000007.14_17821;hsa-miR-522-3p
HEG1	57493	hsa_circ_0030467	0.595745	5.33907e-23	13	NC_000011.10_23807;hsa-miR-181c-5p;NC_000002.12_3880;hsa-miR-3929;hsa-miR-22-3p;hsa-miR-664a-5p;hsa-miR-9-5p;hsa-miR-203a-3p;NC_000023.11_37419;hsa-miR-22-5p;hsa-miR-6761-5p;hsa-miR-3189-3p;NC_000009.12_21531
HEG1	57493	hsa_circ_0014557	0.789474	5.33907e-23	13	hsa-miR-27a-3p;hsa-miR-6842-3p;hsa-miR-9-5p;NC_000002.12_3880;hsa-miR-98-5p;NC_000017.11_32431;NC_000017.11_32431*;NC_000023.11_37419;hsa-miR-181a-5p;hsa-miR-215-3p;hsa-miR-22-5p;hsa-miR-6511b-5p;hsa-miR-3189-3p
BUB1B	701	hsa_circ_0008221	0.0528846	5.33907e-23	13	hsa-miR-328-3p;hsa-miR-193a-5p;hsa-miR-24-3p;hsa-miR-6842-3p;hsa-miR-659-5p;hsa-miR-369-3p;hsa-miR-22-3p;hsa-miR-449c-5p;hsa-miR-9-5p;hsa-miR-98-5p;hsa-miR-6511b-5p;hsa-miR-22-5p;NC_000009.12_21531
GLDC	2731	hsa_circ_0008221	0.0456731	5.33907e-23	13	hsa-miR-328-3p;hsa-miR-193a-5p;NC_000014.9_29046;hsa-miR-155-5p;NC_000003.12_9115;hsa-miR-21-5p;hsa-miR-30d-5p;hsa-miR-6842-3p;hsa-miR-22-3p;NC_000016.10_31213;hsa-miR-3929;hsa-miR-203a-3p;hsa-miR-22-5p
SCNN1A	6337	hsa_circ_0008221	0.0528846	5.33907e-23	13	hsa-miR-328-3p;hsa-miR-21-5p;hsa-miR-27a-3p;hsa-miR-6842-3p;NC_000002.12_3880;hsa-miR-449c-5p;hsa-miR-3929;hsa-miR-9-5p;hsa-miR-6511b-5p;NC_000010.11_22861;NC_000011.10_24785;NC_000020.11_34751;hsa-miR-4443
TCTN2	79867	hsa_circ_0008221	0.0504808	5.33907e-23	13	hsa-miR-27a-3p;NC_000016.10_31515;hsa-miR-24-3p;hsa-miR-659-5p;hsa-miR-181c-5p;hsa-miR-369-3p;hsa-miR-3929;hsa-miR-98-5p;NC_000017.11_32431;hsa-miR-181a-5p;hsa-miR-6511b-5p;hsa-miR-22-5p;NC_000011.10_24785
TLDC1	57707	hsa_circ_0076332	0.486486	5.50489e-23	18	hsa-miR-522-3p;NC_000008.11_19445;hsa-miR-302a-5p;hsa-miR-520c-3p;NC_000003.12_7520;NC_000018.10_33742;hsa-miR-20a-5p;NC_000010.11_23303;hsa-miR-512-3p;hsa-miR-373-5p;NC_000006.12_15769;hsa-miR-3143;NC_000003.12_8583;hsa-miR-15b-3p;hsa-miR-5585-3p;hsa-miR-1323;hsa-miR-17-5p;hsa-miR-18a-3p
TUBGCP3	10426	hsa_circ_0006957	0.0714286	5.65019e-23	14	hsa-miR-30d-5p;hsa-miR-21-5p;hsa-miR-155-5p;hsa-miR-193a-5p;NC_000003.12_9115;hsa-miR-24-3p;hsa-miR-659-5p;hsa-miR-9-5p;hsa-miR-449c-5p;hsa-miR-3929;NC_000012.12_26540;NC_000019.10_34428;hsa-miR-22-5p;NC_000011.10_24785
TNFRSF19	55504	hsa_circ_0006957	0.0612245	5.65019e-23	14	hsa-miR-30d-5p;hsa-miR-193a-5p;hsa-miR-155-5p;hsa-miR-27a-3p;NC_000003.12_9115;hsa-miR-24-3p;hsa-miR-22-3p;hsa-miR-449c-5p;hsa-miR-3929;hsa-miR-9-5p;NC_000012.12_26540;NC_000010.11_22861;NC_000011.10_23882;NC_000011.10_24785
MCM10	55388	hsa_circ_0006957	0.0646259	5.65019e-23	14	hsa-miR-30d-5p;hsa-miR-21-5p;hsa-miR-155-5p;hsa-miR-27a-3p;NC_000016.10_31515;hsa-miR-215-5p;hsa-miR-24-3p;hsa-miR-9-5p;hsa-miR-3929;hsa-miR-664a-5p;NC_000012.12_26540;hsa-miR-22-5p;NC_000011.10_23882;NC_000011.10_24785
NAMPT	10135	hsa_circ_0059713	0.439024	5.88516e-23	18	NC_000023.11_36905;hsa-miR-3662;hsa-miR-7974;hsa-miR-20a-5p;NC_000011.10_25384;NC_000003.12_9133;NC_000018.10_33504*;hsa-miR-582-5p;hsa-miR-7-5p;NC_000003.12_7276;NC_000005.10_11919>NC_000005.10_11920;hsa-miR-1323;hsa-miR-372-5p;hsa-miR-526b-5p;NC_000022.11_36437;NC_000018.10_33037;hsa-miR-3529-3p;hsa-miR-34c-5p
PDLIM5	10611	hsa_circ_0053716	0.454545	6.17448e-23	18	hsa-miR-520a-3p;NC_000002.12_3238;hsa-miR-3662;hsa-miR-3155a;NC_000021.9_35751;hsa-miR-7974;hsa-miR-302c-5p;hsa-let-7c-5p;NC_000001.11_3101;NC_000010.11_23646;hsa-miR-512-3p;NC_000018.10_33504*;hsa-miR-92a-1-5p;hsa-miR-372-5p;hsa-miR-5585-3p;hsa-miR-1323;hsa-miR-3529-3p;NC_000007.14_17821
TLDC2	140711	hsa_circ_0059354	0.288889	6.22136e-23	11	NC_000014.9_29046;hsa-miR-6842-3p;hsa-miR-22-3p;hsa-miR-449c-5p;NC_000016.10_31213;hsa-miR-3929;hsa-miR-9-5p;hsa-miR-98-5p;NC_000017.11_32431;hsa-miR-6511b-5p;hsa-miR-22-5p
PLCE1	51196	hsa_circ_0012566	0.64	6.27131e-23	14	hsa-miR-30d-5p;hsa-miR-499a-5p;NC_000003.12_9115;hsa-miR-24-3p;hsa-miR-181c-5p;hsa-miR-9-5p;hsa-miR-22-3p;hsa-miR-664a-5p;hsa-miR-203a-3p;hsa-miR-181a-5p;hsa-miR-22-5p;NC_000010.11_22861;hsa-miR-6511b-5p;NC_000009.12_21531
CLSPN	63967	hsa_circ_0012566	0.68	6.27131e-23	14	hsa-miR-193a-5p;hsa-miR-24-3p;NC_000011.10_23882;hsa-miR-181c-5p;hsa-miR-9-5p;hsa-miR-22-3p;hsa-miR-664a-5p;hsa-miR-203a-3p;hsa-miR-181a-5p;hsa-miR-22-5p;NC_000010.11_22861;NC_000008.11_18787;hsa-miR-6511b-5p;NC_000009.12_21531
ATAD2	29028	hsa_circ_0059354	0.4	6.83334e-23	13	hsa-miR-30d-5p;hsa-miR-193a-5p;hsa-miR-27a-3p;hsa-miR-24-3p;hsa-miR-6842-3p;NC_000002.12_3880;hsa-miR-3929;NC_000016.10_31213;hsa-miR-98-5p;NC_000017.11_32431;hsa-miR-6511b-5p;hsa-miR-22-5p;NC_000011.10_24785
UNG	7374	hsa_circ_0059354	0.333333	6.83334e-23	13	hsa-miR-193a-5p;hsa-miR-6842-3p;hsa-miR-22-3p;hsa-miR-449c-5p;hsa-miR-3929;NC_000002.12_3880;hsa-miR-4758-3p;NC_000017.11_32431;hsa-miR-22-5p;hsa-miR-6511b-5p;hsa-miR-215-3p;NC_000011.10_24785;NC_000010.11_22861
GMNN	51053	hsa_circ_0059354	0.333333	6.83334e-23	13	hsa-miR-30d-5p;hsa-miR-193a-5p;hsa-miR-27a-3p;NC_000024.10_38844;hsa-miR-181c-5p;hsa-miR-449c-5p;hsa-miR-3929;hsa-miR-98-5p;hsa-miR-181a-5p;hsa-miR-22-5p;NC_000010.11_22861;hsa-miR-215-3p;NC_000011.10_24785
PROM2	150696	hsa_circ_0059354	0.4	6.83334e-23	13	hsa-miR-193a-5p;hsa-miR-24-3p;hsa-miR-6842-3p;hsa-miR-181c-5p;hsa-miR-22-3p;NC_000002.12_3880;hsa-miR-3929;hsa-miR-98-5p;hsa-miR-181a-5p;hsa-miR-6511b-5p;hsa-miR-22-5p;NC_000011.10_24785;NC_000010.11_22861
DTX3L	151636	hsa_circ_0012566	0.56	6.83334e-23	13	hsa-miR-499a-5p;hsa-miR-193a-5p;hsa-miR-181c-5p;hsa-miR-9-5p;hsa-miR-22-3p;hsa-miR-664a-5p;hsa-miR-203a-3p;hsa-miR-181a-5p;hsa-miR-22-5p;NC_000010.11_22861;NC_000008.11_18787;NC_000011.10_23882;NC_000009.12_21531
TGFBR2	7048	hsa_circ_0012566	0.6	6.83334e-23	13	hsa-miR-30d-5p;hsa-miR-21-5p;NC_000003.12_9115;hsa-miR-181c-5p;hsa-miR-22-3p;hsa-miR-449c-5p;NC_000016.10_31213;hsa-miR-9-5p;hsa-miR-203a-3p;hsa-miR-181a-5p;hsa-miR-6511b-5p;hsa-miR-22-5p;NC_000008.11_18787
CCNF	899	hsa_circ_0068582	0.607143	6.89532e-23	12	hsa-miR-30d-5p;NC_000003.12_9115;hsa-miR-27a-3p;hsa-miR-24-3p;hsa-miR-6807-5p;hsa-miR-181c-5p;hsa-miR-9-5p;hsa-miR-98-5p;hsa-miR-664a-5p;hsa-miR-181a-5p;hsa-miR-22-5p;NC_000011.10_24785
LBR	3930	hsa_circ_0068582	0.428571	7.07814e-23	11	hsa-miR-30d-5p;NC_000003.12_9115;hsa-miR-27a-3p;hsa-miR-24-3p;hsa-miR-181c-5p;hsa-miR-9-5p;hsa-miR-98-5p;hsa-miR-664a-5p;hsa-miR-203a-3p;hsa-miR-181a-5p;NC_000011.10_24785
ICMT	23463	hsa_circ_0052203	0.444444	7.30114e-23	14	hsa-miR-26b-5p;hsa-miR-6842-3p;hsa-miR-181c-5p;hsa-miR-22-3p;hsa-miR-3929;hsa-miR-4435;hsa-miR-98-5p;NC_000017.11_32431;hsa-miR-6511b-5p;hsa-miR-22-5p;NC_000011.10_24785;NC_000010.11_22289;NC_000010.11_22861;hsa-miR-4443
DDX11	1663	hsa_circ_0086848	0.346939	7.53855e-23	13	hsa-miR-328-3p;hsa-miR-193a-5p;hsa-miR-24-3p;hsa-miR-659-5p;hsa-miR-22-3p;hsa-miR-449c-5p;hsa-miR-4435;NC_000017.11_32431;NC_000019.10_34428;hsa-miR-6511b-5p;hsa-miR-22-5p;NC_000010.11_22861;hsa-miR-183-5p
KIFC1	3833	hsa_circ_0086848	0.285714	7.53855e-23	13	hsa-miR-328-3p;hsa-miR-4443;hsa-miR-659-5p;NC_000005.10_13790;hsa-miR-369-3p;hsa-miR-3929;hsa-miR-4435;NC_000019.10_34428;hsa-miR-203a-3p;hsa-miR-6511b-5p;hsa-miR-22-5p;NC_000011.10_23882;hsa-miR-183-5p
DZIP1L	199221	hsa_circ_0052203	0.472222	7.53855e-23	13	NC_000014.9_29046;hsa-miR-6842-3p;hsa-miR-22-3p;NC_000002.12_3880;hsa-miR-3929;hsa-miR-4435;hsa-miR-98-5p;hsa-miR-148a-3p;NC_000017.11_32431*;hsa-miR-6511b-5p;hsa-miR-642a-5p;NC_000011.10_24785;NC_000009.12_21531
KIF19	124602	hsa_circ_0052203	0.416667	7.53855e-23	13	NC_000014.9_29046;hsa-miR-6842-3p;hsa-miR-22-3p;hsa-miR-3929;NC_000017.11_32431;NC_000017.11_32431*;hsa-miR-6511b-5p;hsa-miR-22-5p;NC_000011.10_24785;NC_000010.11_22861;NC_000020.11_34751;hsa-miR-4443;NC_000009.12_21531
CENPI	2491	hsa_circ_0052203	0.388889	7.53855e-23	13	hsa-miR-6842-3p;hsa-miR-181c-5p;hsa-miR-3929;hsa-miR-4435;hsa-miR-98-5p;NC_000017.11_32431;NC_000017.11_32431*;hsa-miR-6511b-5p;hsa-miR-642a-5p;hsa-miR-22-5p;NC_000010.11_22289;NC_000010.11_22861;NC_000020.11_34751
CD22	933	hsa_circ_0059713	0.390244	7.81008e-23	16	hsa-miR-92a-3p;hsa-miR-302a-5p;hsa-miR-3662;NC_000021.9_35751;hsa-miR-7974;hsa-miR-573;NC_000016.10_31157;NC_000003.12_9133;NC_000011.10_25384;hsa-miR-373-5p;hsa-miR-371a-5p;NC_000002.12_3238;NC_000018.10_33037;hsa-miR-372-5p;NC_000005.10_11919>NC_000005.10_11920;NC_000006.12_15769
MCM4	4173	hsa_circ_0038178	0.5	7.89937e-23	13	hsa-miR-27a-3p;hsa-miR-6842-3p;hsa-miR-181c-5p;hsa-miR-9-5p;NC_000002.12_3880;hsa-miR-3929;hsa-miR-4435;hsa-miR-664a-5p;NC_000017.11_32431;hsa-miR-181a-5p;hsa-miR-642a-5p;hsa-miR-6511b-5p;hsa-miR-4443
IQGAP3	128239	hsa_circ_0030467	0.425532	8.10653e-23	13	hsa-miR-499a-5p;hsa-miR-21-5p;hsa-miR-181c-5p;NC_000002.12_3880;hsa-miR-22-3p;NC_000011.10_23807;hsa-miR-3929;hsa-miR-4435;hsa-miR-664a-5p;hsa-miR-9-5p;hsa-miR-22-5p;hsa-miR-6761-5p;NC_000009.12_21531
PHLDA1	22822	hsa_circ_0053716	0.436364	8.77449e-23	18	hsa-miR-92a-3p;hsa-miR-3662;hsa-miR-3155a;hsa-miR-7974;hsa-let-7c-5p;NC_000010.11_23303;NC_000010.11_23646;hsa-miR-548i;NC_000018.10_33504*;NC_000009.12_20733;hsa-miR-92a-1-5p;hsa-miR-510-5p;hsa-miR-302b-5p;hsa-miR-372-5p;NC_000002.12_3238;hsa-miR-1323;hsa-miR-3529-3p;NC_000007.14_17821
IFRD1	3475	hsa_circ_0076332	0.459459	8.95345e-23	16	NC_000008.11_19445;hsa-miR-3662;NC_000003.12_7520;hsa-miR-20a-5p;hsa-miR-573;NC_000010.11_23303;hsa-miR-548j-3p;hsa-miR-512-3p;hsa-miR-3143;hsa-miR-27b-5p;hsa-miR-18a-3p;hsa-miR-302b-5p;hsa-miR-1323;NC_000008.11_20037;NC_000007.14_17821;hsa-miR-522-3p
ARHGEF2	9181	hsa_circ_0059713	0.439024	9.30617e-23	17	NC_000006.12_16700;hsa-miR-7974;hsa-miR-573;hsa-miR-526b-5p;NC_000001.11_2997;NC_000016.10_31157;NC_000010.11_23646;NC_000018.10_33504*;hsa-miR-582-5p;hsa-miR-371a-5p;NC_000009.12_21925;NC_000002.12_3238;hsa-miR-205-5p;NC_000005.10_11919>NC_000005.10_11920;hsa-miR-3529-3p;hsa-miR-34c-5p;NC_000006.12_15769
PRSS37	136242	hsa_circ_0086848	0.367347	9.38975e-23	14	hsa-miR-328-3p;hsa-miR-193a-5p;hsa-miR-24-3p;hsa-miR-659-5p;hsa-miR-6842-3p;hsa-miR-9-5p;hsa-miR-22-3p;hsa-miR-98-5p;NC_000017.11_32431;hsa-miR-203a-3p;hsa-miR-6511b-5p;hsa-miR-22-5p;NC_000011.10_23882;hsa-miR-4443
ZNF430	80264	hsa_circ_0059713	0.390244	9.62235e-23	15	hsa-miR-92a-3p;NC_000023.11_36905;NC_000021.9_35751;hsa-miR-20a-5p;hsa-miR-573;NC_000016.10_31157;NC_000003.12_9133;hsa-miR-548i;hsa-miR-582-5p;NC_000005.10_11919>NC_000005.10_11920;NC_000002.12_3238;hsa-miR-7-5p;NC_000018.10_33037;NC_000008.11_20037;hsa-miR-3662
MID1	4281	hsa_circ_0037864	1	9.89765e-23	11	hsa-miR-193a-5p;hsa-miR-27a-3p;NC_000005.10_13790;hsa-miR-9-5p;NC_000002.12_3880;hsa-miR-22-3p;hsa-miR-98-5p;NC_000017.11_32431;hsa-miR-203a-3p;NC_000020.11_34751;NC_000009.12_21531
CDCA2	157313	hsa_circ_0037864	1	9.89765e-23	11	hsa-miR-193a-5p;hsa-miR-27a-3p;NC_000005.10_13790;hsa-miR-9-5p;NC_000002.12_3880;hsa-miR-22-3p;hsa-miR-98-5p;NC_000017.11_32431;hsa-miR-203a-3p;NC_000020.11_34751;NC_000009.12_21531
BCOR	54880	hsa_circ_0037864	1	9.89765e-23	11	hsa-miR-193a-5p;hsa-miR-27a-3p;NC_000005.10_13790;hsa-miR-9-5p;NC_000002.12_3880;hsa-miR-22-3p;hsa-miR-98-5p;NC_000017.11_32431;hsa-miR-203a-3p;NC_000020.11_34751;NC_000009.12_21531
THG1L	54974	hsa_circ_0008221	0.0480769	1.00014e-22	14	NC_000014.9_29046;hsa-miR-27a-3p;hsa-miR-9-5p;NC_000002.12_3880;hsa-miR-449c-5p;hsa-miR-664a-5p;hsa-miR-98-5p;hsa-miR-203a-3p;hsa-miR-6511b-5p;hsa-miR-22-5p;NC_000010.11_22861;NC_000020.11_34751;hsa-miR-4443;NC_000009.12_21531
TK1	7083	hsa_circ_0008221	0.0432692	1.00014e-22	14	hsa-miR-328-3p;hsa-miR-193a-5p;NC_000014.9_29046;hsa-miR-27a-3p;hsa-miR-6842-3p;NC_000002.12_3880;hsa-miR-449c-5p;hsa-miR-3929;hsa-miR-98-5p;hsa-miR-6511b-5p;NC_000016.10_31515;NC_000011.10_24785;NC_000020.11_34751;NC_000009.12_21531
CDH17	1015	hsa_circ_0008221	0.0336538	1.00014e-22	14	hsa-miR-193a-5p;hsa-miR-21-5p;hsa-miR-155-5p;hsa-miR-27a-3p;hsa-miR-24-3p;hsa-miR-9-5p;hsa-miR-3929;NC_000017.11_32431;NC_000019.10_34428;hsa-miR-203a-3p;hsa-miR-22-5p;NC_000011.10_23882;hsa-miR-4443;NC_000009.12_21531
SUSD4	55061	hsa_circ_0008221	0.0432692	1.00014e-22	14	hsa-miR-193a-5p;NC_000014.9_29046;hsa-miR-27a-3p;hsa-miR-659-5p;hsa-miR-9-5p;hsa-miR-22-3p;hsa-miR-3929;hsa-miR-664a-5p;hsa-miR-98-5p;NC_000017.11_32431;hsa-miR-203a-3p;hsa-miR-22-5p;NC_000011.10_24785;NC_000010.11_22861
CENPW	387103	hsa_circ_0008221	0.0480769	1.00014e-22	14	hsa-miR-30d-5p;hsa-miR-21-5p;hsa-miR-155-5p;NC_000003.12_9115;hsa-miR-24-3p;hsa-miR-659-5p;hsa-miR-181c-5p;hsa-miR-22-3p;hsa-miR-369-3p;hsa-miR-3929;hsa-miR-449c-5p;hsa-miR-203a-3p;hsa-miR-181a-5p;hsa-miR-22-5p
MAP3K1	4214	hsa_circ_0012566	0.64	1.04216e-22	14	hsa-miR-499a-5p;hsa-miR-21-5p;hsa-miR-193a-5p;NW_003315954.1_39634;hsa-miR-24-3p;hsa-miR-181c-5p;hsa-miR-22-3p;hsa-miR-9-5p;hsa-miR-203a-3p;hsa-miR-181a-5p;hsa-miR-22-5p;NC_000008.11_18787;NC_000011.10_23882;NC_000009.12_21531
FRAS1	80144	hsa_circ_0076332	0.513514	1.07542e-22	18	NC_000013.11_27627;hsa-miR-302a-5p;hsa-miR-3662;NC_000003.12_7520;hsa-miR-20a-5p;hsa-miR-573;NC_000010.11_23303;hsa-miR-512-3p;hsa-miR-373-5p;NC_000008.11_20037;NC_000012.12_26286;hsa-miR-27b-5p;NC_000003.12_8583;hsa-miR-15b-3p;hsa-miR-302b-5p;hsa-miR-372-5p;NC_000007.14_17821;hsa-miR-34c-5p
BTN3A1	11119	hsa_circ_0006957	0.0646259	1.07668e-22	13	hsa-miR-155-5p;hsa-miR-27a-3p;hsa-miR-24-3p;hsa-miR-22-3p;NC_000001.11_1021;NC_000016.10_31213;hsa-miR-3929;hsa-miR-449c-5p;NC_000012.12_26540;NC_000019.10_34428;hsa-miR-22-5p;NC_000011.10_24785;NC_000010.11_22861
IFIT1	3434	hsa_circ_0006957	0.0714286	1.12469e-22	14	hsa-miR-30d-5p;hsa-miR-193a-5p;hsa-miR-27a-3p;NC_000003.12_9115;hsa-miR-659-5p;hsa-miR-9-5p;hsa-miR-449c-5p;hsa-miR-3929;hsa-miR-664a-5p;NC_000019.10_34428;hsa-miR-22-5p;NC_000010.11_22861;NC_000011.10_23882;NC_000011.10_24785
TDP1	55775	hsa_circ_0052203	0.444444	1.29325e-22	14	hsa-miR-26b-5p;NC_000024.10_38844;hsa-miR-181c-5p;hsa-miR-22-3p;NC_000002.12_3880;hsa-miR-98-5p;hsa-miR-4435;NC_000017.11_32431;NC_000017.11_32431*;hsa-miR-22-5p;NC_000011.10_24785;NC_000010.11_22861;hsa-miR-4443;NC_000009.12_21531
PRSS23	11098	hsa_circ_0052203	0.472222	1.29325e-22	14	NC_000024.10_38844;hsa-miR-6842-3p;hsa-miR-6807-5p;hsa-miR-181c-5p;NC_000002.12_3880;hsa-miR-3929;hsa-miR-4435;hsa-miR-98-5p;NC_000017.11_32431;NC_000017.11_32431*;hsa-miR-6511b-5p;hsa-miR-642a-5p;NC_000011.10_24785;NC_000020.11_34751
SMC4	10051	hsa_circ_0008221	0.0456731	1.29911e-22	12	hsa-miR-193a-5p;hsa-miR-24-3p;hsa-miR-181c-5p;hsa-miR-9-5p;NC_000002.12_3880;hsa-miR-369-3p;hsa-miR-203a-3p;hsa-miR-181a-5p;NC_000004.12_10963;hsa-miR-22-5p;hsa-miR-6511b-5p;hsa-miR-4443
ALS2	57679	hsa_circ_0008221	0.0576923	1.29911e-22	12	hsa-miR-24-3p;hsa-miR-22-3p;hsa-miR-449c-5p;hsa-miR-3929;NC_000016.10_31213;hsa-miR-664a-5p;hsa-miR-98-5p;NC_000017.11_32431;hsa-miR-203a-3p;hsa-miR-22-5p;NC_000011.10_24785;hsa-miR-4443
ESPL1	9700	hsa_circ_0038178	0.571429	1.30103e-22	13	hsa-miR-27a-3p;hsa-miR-24-3p;hsa-miR-6842-3p;NC_000002.12_3880;hsa-miR-9-5p;hsa-miR-3929;hsa-miR-4435;hsa-miR-664a-5p;NC_000017.11_32431;hsa-miR-6511b-5p;hsa-miR-642a-5p;hsa-miR-22-5p;hsa-miR-4443
CNTNAP2	26047	hsa_circ_0038178	0.642857	1.30103e-22	13	hsa-miR-27a-3p;hsa-miR-6842-3p;hsa-miR-181c-5p;hsa-miR-9-5p;NC_000002.12_3880;hsa-miR-3929;hsa-miR-664a-5p;NC_000012.12_26540;NC_000017.11_32431;hsa-miR-181a-5p;hsa-miR-6511b-5p;hsa-miR-22-5p;hsa-miR-4443
CBX2	84733	hsa_circ_0038178	0.5	1.30103e-22	13	hsa-miR-27a-3p;hsa-miR-24-3p;hsa-miR-6842-3p;hsa-miR-181c-5p;NC_000002.12_3880;hsa-miR-9-5p;hsa-miR-3929;hsa-miR-4435;hsa-miR-181a-5p;hsa-miR-642a-5p;hsa-miR-22-5p;hsa-miR-6511b-5p;hsa-miR-4443
SERTAD4	56256	hsa_circ_0012566	0.56	1.36221e-22	13	hsa-miR-30d-5p;hsa-miR-499a-5p;hsa-miR-193a-5p;hsa-miR-181c-5p;hsa-miR-9-5p;hsa-miR-664a-5p;hsa-miR-203a-3p;hsa-miR-181a-5p;hsa-miR-22-5p;NC_000010.11_22861;NC_000008.11_18787;hsa-miR-6511b-5p;NC_000009.12_21531
GATM	2628	hsa_circ_0012566	0.56	1.36221e-22	13	hsa-miR-30d-5p;hsa-miR-21-5p;hsa-miR-193a-5p;NC_000003.12_9115;hsa-miR-24-3p;hsa-miR-181c-5p;hsa-miR-9-5p;hsa-miR-449c-5p;hsa-miR-22-3p;hsa-miR-203a-3p;hsa-miR-181a-5p;NC_000016.10_31515;NC_000009.12_21531
NFKBIZ	64332	hsa_circ_0059713	0.390244	1.39598e-22	16	NC_000023.11_36905;hsa-miR-3662;hsa-miR-7974;hsa-miR-573;hsa-miR-20a-5p;NC_000003.12_9133;NC_000010.11_23646;hsa-miR-373-5p;NC_000018.10_33504*;hsa-miR-582-5p;NC_000003.12_7276;NC_000009.12_21925;NC_000016.10_31157;hsa-miR-1323;hsa-miR-3529-3p;hsa-miR-34c-5p
KIAA1033		hsa_circ_0076332	0.432432	1.46024e-22	16	NC_000008.11_19445;hsa-miR-34c-5p;hsa-miR-520c-3p;NC_000003.12_7520;NC_000008.11_20037*;hsa-miR-573;NC_000018.10_33742;hsa-miR-20a-5p;NC_000010.11_23303;hsa-miR-373-5p;NC_000012.12_26286;hsa-miR-372-5p;NC_000006.12_15769;hsa-miR-17-5p;NC_000007.14_17821;hsa-miR-522-3p
RGS3	5998	hsa_circ_0038178	0.678571	1.48792e-22	14	hsa-miR-27a-3p;hsa-miR-24-3p;hsa-miR-6842-3p;hsa-miR-181c-5p;NC_000002.12_3880;hsa-miR-9-5p;hsa-miR-3929;hsa-miR-4435;NC_000017.11_32431;hsa-miR-181a-5p;hsa-miR-642a-5p;hsa-miR-22-5p;hsa-miR-6511b-5p;hsa-miR-4443
DTX3L	151636	hsa_circ_0086848	0.326531	1.56485e-22	13	hsa-miR-193a-5p;hsa-miR-6842-3p;hsa-miR-9-5p;hsa-miR-22-3p;hsa-miR-3929;hsa-miR-98-5p;NC_000017.11_32431;NC_000019.10_34428;hsa-miR-203a-3p;hsa-miR-22-5p;NC_000010.11_22861;NC_000011.10_23882;hsa-miR-4443
HJURP	55355	hsa_circ_0086848	0.346939	1.56485e-22	13	hsa-miR-328-3p;hsa-miR-193a-5p;hsa-miR-24-3p;NC_000005.10_13790;hsa-miR-22-3p;hsa-miR-449c-5p;hsa-miR-3929;hsa-miR-4435;hsa-miR-98-5p;hsa-miR-203a-3p;hsa-miR-6511b-5p;NC_000010.11_22861;hsa-miR-183-5p
SLCO2A1	6578	hsa_circ_0086848	0.408163	1.56485e-22	13	hsa-miR-328-3p;hsa-miR-193a-5p;hsa-miR-24-3p;hsa-miR-659-5p;NC_000005.10_13790;hsa-miR-22-3p;hsa-miR-449c-5p;hsa-miR-3929;hsa-miR-98-5p;NC_000017.11_32431;hsa-miR-6511b-5p;hsa-miR-22-5p;hsa-miR-4443
DNMT1	1786	hsa_circ_0086848	0.387755	1.56485e-22	13	hsa-miR-328-3p;hsa-miR-193a-5p;hsa-miR-24-3p;hsa-miR-6842-3p;NC_000005.10_13790;hsa-miR-9-5p;hsa-miR-22-3p;hsa-miR-3929;hsa-miR-4435;hsa-miR-98-5p;hsa-miR-148a-3p;hsa-miR-6511b-5p;hsa-miR-22-5p
STOX1	219736	hsa_circ_0086848	0.367347	1.56485e-22	13	hsa-miR-328-3p;hsa-miR-6842-3p;hsa-miR-9-5p;hsa-miR-22-3p;hsa-miR-3929;hsa-miR-449c-5p;hsa-miR-98-5p;NC_000017.11_32431;hsa-miR-203a-3p;hsa-miR-6511b-5p;hsa-miR-22-5p;NC_000011.10_23882;hsa-miR-183-5p
KNTC1	9735	hsa_circ_0059354	0.333333	1.56485e-22	13	hsa-miR-30d-5p;hsa-miR-193a-5p;NC_000014.9_29046;hsa-miR-24-3p;hsa-miR-6842-3p;hsa-miR-9-5p;hsa-miR-22-3p;hsa-miR-3929;hsa-miR-98-5p;hsa-miR-6511b-5p;hsa-miR-22-5p;NC_000011.10_24785;hsa-miR-4443
ESCO2	157570	hsa_circ_0059354	0.333333	1.56485e-22	13	hsa-miR-30d-5p;NC_000024.10_38844;hsa-miR-24-3p;hsa-miR-181c-5p;hsa-miR-22-3p;hsa-miR-449c-5p;hsa-miR-9-5p;NC_000017.11_32431;hsa-miR-181a-5p;hsa-miR-22-5p;NC_000010.11_22861;hsa-miR-6511b-5p;hsa-miR-215-3p
PRICKLE2	166336	hsa_circ_0014115	1	1.56548e-22	12	hsa-miR-328-3p;NC_000014.9_29046;hsa-miR-27a-3p;hsa-miR-24-3p;hsa-miR-6842-3p;hsa-miR-22-3p;hsa-miR-449c-5p;hsa-miR-3929;NC_000019.10_34428;hsa-miR-22-5p;NC_000020.11_34751;hsa-miR-183-5p
PLCE1	51196	hsa_circ_0086848	0.44898	1.59101e-22	14	hsa-miR-328-3p;hsa-miR-24-3p;hsa-miR-659-5p;hsa-miR-6842-3p;hsa-miR-9-5p;hsa-miR-22-3p;hsa-miR-3929;hsa-miR-4435;hsa-miR-98-5p;NC_000017.11_32431;hsa-miR-203a-3p;hsa-miR-6511b-5p;hsa-miR-22-5p;NC_000010.11_22861
LMNB2	84823	hsa_circ_0086848	0.408163	1.59101e-22	14	hsa-miR-328-3p;hsa-miR-24-3p;NC_000005.10_13790;hsa-miR-9-5p;hsa-miR-22-3p;hsa-miR-449c-5p;hsa-miR-4435;hsa-miR-148a-3p;NC_000017.11_32431;NC_000019.10_34428;hsa-miR-203a-3p;hsa-miR-6511b-5p;hsa-miR-22-5p;hsa-miR-4443
KIF18B	146909	hsa_circ_0052203	0.444444	1.63823e-22	13	hsa-miR-6842-3p;hsa-miR-6807-5p;NC_000002.12_3880;hsa-miR-3929;hsa-miR-4435;hsa-miR-98-5p;hsa-miR-148a-3p;NC_000017.11_32431;hsa-miR-6511b-5p;hsa-miR-22-5p;NC_000011.10_24785;hsa-miR-4443;NC_000009.12_21531
CTSV	1515	hsa_circ_0052203	0.416667	1.63823e-22	13	NC_000024.10_38844;hsa-miR-26b-5p;hsa-miR-6842-3p;hsa-miR-449c-5p;hsa-miR-3929;hsa-miR-4435;hsa-miR-98-5p;hsa-miR-148a-3p;NC_000017.11_32431;hsa-miR-642a-5p;hsa-miR-22-5p;NC_000011.10_24785;NC_000009.12_21531
SEL1L3	23231	hsa_circ_0053716	0.4	1.65895e-22	17	hsa-miR-92a-3p;NC_000002.12_3238;hsa-miR-3662;hsa-miR-3155a;hsa-let-7c-5p;hsa-miR-302c-5p;NC_000003.12_9133;NC_000010.11_23303;NC_000001.11_3101;NC_000010.11_23646;hsa-miR-548i;NC_000018.10_33504*;hsa-miR-510-5p;hsa-miR-302b-5p;hsa-miR-5585-3p;hsa-miR-372-5p;NC_000007.14_17821
CFTR	1080	hsa_circ_0030467	0.468085	1.68542e-22	12	hsa-miR-21-5p;NC_000011.10_23807;NC_000002.12_3880;hsa-miR-22-3p;hsa-miR-3929;hsa-miR-4435;hsa-miR-664a-5p;hsa-miR-9-5p;hsa-miR-203a-3p;hsa-miR-22-5p;hsa-miR-6761-5p;NC_000009.12_21531
RFC3	5983	hsa_circ_0012566	0.64	1.70038e-22	14	hsa-miR-499a-5p;hsa-miR-21-5p;hsa-miR-193a-5p;NW_003315954.1_39634;hsa-miR-24-3p;hsa-miR-9-5p;hsa-miR-449c-5p;hsa-miR-664a-5p;hsa-miR-203a-3p;hsa-miR-181a-5p;hsa-miR-22-5p;NC_000010.11_22861;hsa-miR-6511b-5p;NC_000009.12_21531
USP2	9099	hsa_circ_0059354	0.355556	1.71116e-22	12	hsa-miR-193a-5p;hsa-miR-30d-5p;hsa-miR-27a-3p;hsa-miR-24-3p;hsa-miR-22-3p;hsa-miR-449c-5p;NC_000016.10_31213;hsa-miR-3929;hsa-miR-9-5p;hsa-miR-98-5p;NC_000011.10_24785;hsa-miR-4443
GPR26	2849	hsa_circ_0091119	0.65	1.73118e-22	12	hsa-miR-193a-5p;hsa-miR-27a-3p;NW_003315954.1_39634;hsa-miR-9-5p;hsa-miR-3929;hsa-miR-664a-5p;hsa-miR-5701;NC_000019.10_34428;hsa-miR-181a-5p;hsa-miR-7706;NC_000011.10_23882;NC_000011.10_24785
CNTNAP2	26047	hsa_circ_0091119	0.8	1.73118e-22	12	hsa-miR-193a-5p;hsa-miR-27a-3p;NW_003315954.1_39634;hsa-miR-6807-5p;hsa-miR-9-5p;hsa-miR-3929;hsa-miR-664a-5p;NC_000019.10_34428;hsa-miR-181a-5p;hsa-miR-22-5p;NC_000011.10_23882;NC_000011.10_24785
DNAJC10	54431	hsa_circ_0076332	0.513514	1.73616e-22	17	hsa-miR-522-3p;NC_000013.11_27627;NC_000008.11_19445;hsa-miR-34c-5p;hsa-miR-520c-3p;hsa-miR-20a-5p;hsa-miR-573;hsa-miR-373-5p;NC_000008.11_20037;hsa-miR-3143;NC_000003.12_7973;hsa-miR-372-5p;NC_000006.12_15769;hsa-miR-1323;hsa-miR-17-5p;NC_000007.14_17821;hsa-miR-18a-3p
ADAM20	8748	hsa_circ_0076332	0.567568	1.76343e-22	19	hsa-miR-3662;hsa-miR-520c-3p;NC_000003.12_7520;hsa-miR-20a-5p;hsa-miR-573;NC_000010.11_23303;hsa-miR-512-3p;hsa-miR-373-5p;NC_000006.12_15769;NC_000012.12_26286;hsa-miR-302b-5p;hsa-miR-3143;NC_000003.12_8583;hsa-miR-5585-3p;hsa-miR-1323;NC_000007.14_17821;hsa-miR-372-5p;hsa-miR-34c-5p;hsa-miR-18a-3p
SLC39A10	57181	hsa_circ_0059713	0.487805	1.87905e-22	19	NC_000023.11_36905;hsa-miR-3662;hsa-miR-7974;hsa-miR-526b-5p;NC_000016.10_31157;hsa-miR-20a-5p;NC_000011.10_25384;NC_000022.11_36437;hsa-miR-373-5p;NC_000008.11_20037;hsa-miR-582-5p;NC_000005.10_11919>NC_000005.10_11920;hsa-miR-1323;NC_000002.12_3238;hsa-miR-205-5p;NC_000018.10_33037;hsa-miR-372-5p;hsa-miR-34c-5p;NC_000006.12_15769
BTG1	694	hsa_circ_0059713	0.463415	1.89723e-22	18	NC_000006.12_16700;hsa-miR-92a-3p;hsa-miR-302a-5p;hsa-miR-7974;hsa-miR-573;NC_000011.10_25384;NC_000010.11_23646;hsa-miR-548i;NC_000018.10_33504*;NC_000003.12_7276;hsa-miR-371a-5p;NC_000009.12_21925;NC_000002.12_3238;hsa-miR-1323;NC_000018.10_33037;hsa-miR-3529-3p;hsa-miR-3662;NC_000006.12_15769
TICRR	90381	hsa_circ_0038178	0.678571	2.1026e-22	13	hsa-miR-27a-3p;hsa-miR-24-3p;hsa-miR-6842-3p;hsa-miR-181c-5p;hsa-miR-9-5p;hsa-miR-3929;hsa-miR-4435;hsa-miR-664a-5p;NC_000012.12_26540;NC_000017.11_32431;hsa-miR-181a-5p;hsa-miR-6511b-5p;hsa-miR-22-5p
PLCE1	51196	hsa_circ_0038178	0.714286	2.1026e-22	13	hsa-miR-27a-3p;hsa-miR-24-3p;hsa-miR-6842-3p;hsa-miR-181c-5p;NC_000002.12_3880;hsa-miR-9-5p;hsa-miR-3929;hsa-miR-4435;hsa-miR-664a-5p;NC_000017.11_32431;hsa-miR-181a-5p;hsa-miR-6511b-5p;hsa-miR-22-5p
PDE4D	5144	hsa_circ_0038178	0.642857	2.1026e-22	13	hsa-miR-27a-3p;hsa-miR-24-3p;hsa-miR-6842-3p;hsa-miR-181c-5p;NC_000002.12_3880;hsa-miR-9-5p;hsa-miR-3929;hsa-miR-4435;NC_000017.11_32431;hsa-miR-181a-5p;hsa-miR-6511b-5p;hsa-miR-22-5p;hsa-miR-4443
LZTS1	11178	hsa_circ_0038178	0.607143	2.1026e-22	13	hsa-miR-24-3p;hsa-miR-6842-3p;hsa-miR-9-5p;NC_000002.12_3880;hsa-miR-3929;hsa-miR-4435;hsa-miR-664a-5p;NC_000017.11_32431;hsa-miR-6511b-5p;hsa-miR-642a-5p;hsa-miR-22-5p;hsa-miR-1301-3p;hsa-miR-4443
LMNB2	84823	hsa_circ_0038178	0.571429	2.1026e-22	13	hsa-miR-27a-3p;hsa-miR-24-3p;NC_000002.12_3880;hsa-miR-9-5p;hsa-miR-4435;NC_000012.12_26540;NC_000017.11_32431;hsa-miR-181a-5p;hsa-miR-642a-5p;hsa-miR-22-5p;hsa-miR-6511b-5p;hsa-miR-1301-3p;hsa-miR-4443
SP5	389058	hsa_circ_0008221	0.0456731	2.24945e-22	13	hsa-miR-328-3p;hsa-miR-193a-5p;NC_000014.9_29046;hsa-miR-22-3p;hsa-miR-449c-5p;hsa-miR-3929;hsa-miR-664a-5p;hsa-miR-98-5p;NC_000017.11_32431;NC_000019.10_34428;hsa-miR-6511b-5p;NC_000020.11_34751;hsa-miR-4443
H2AFX	3014	hsa_circ_0008221	0.0480769	2.24945e-22	13	hsa-miR-328-3p;hsa-miR-193a-5p;hsa-miR-215-5p;hsa-miR-24-3p;NC_000002.12_3880;hsa-miR-22-3p;hsa-miR-3929;hsa-miR-449c-5p;hsa-miR-98-5p;hsa-miR-6511b-5p;NC_000011.10_24785;NC_000020.11_34751;hsa-miR-4443
SCYL2	55681	hsa_circ_0059713	0.463415	2.34082e-22	17	NC_000023.11_36905;NC_000021.9_35751;hsa-miR-7974;hsa-miR-573;NC_000016.10_31157;hsa-miR-20a-5p;NC_000011.10_25384;NC_000010.11_23646;hsa-miR-373-5p;hsa-miR-7-5p;hsa-miR-372-5p;NC_000002.12_3238;hsa-miR-205-5p;NC_000018.10_33037;hsa-miR-3529-3p;hsa-miR-34c-5p;NC_000006.12_15769
FAM63B		hsa_circ_0076332	0.432432	2.34578e-22	16	hsa-miR-522-3p;NC_000013.11_27627;hsa-miR-520c-3p;NC_000003.12_7520;NC_000018.10_33742;hsa-miR-573;hsa-miR-20a-5p;hsa-miR-373-5p;NC_000012.12_26286;hsa-miR-3143;NC_000003.12_7973;hsa-miR-372-5p;NC_000006.12_15769;hsa-miR-17-5p;NC_000007.14_17821;hsa-miR-18a-3p
KCTD13	253980	hsa_circ_0076332	0.486486	2.34578e-22	16	NC_000008.11_19445;hsa-miR-3662;hsa-miR-520c-3p;hsa-miR-20a-5p;hsa-miR-573;hsa-miR-512-3p;hsa-miR-373-5p;NC_000006.12_15769;hsa-miR-3143;NC_000003.12_7973;hsa-miR-372-5p;hsa-miR-5585-3p;hsa-miR-1323;hsa-miR-17-5p;NC_000007.14_17821;hsa-miR-34c-5p
KALRN	8997	hsa_circ_0063772	0.9375	2.40777e-22	13	hsa-miR-30d-5p;hsa-miR-21-5p;NC_000003.12_9115;hsa-miR-27a-3p;hsa-miR-24-3p;NC_000002.12_3880;hsa-miR-449c-5p;hsa-miR-3929;hsa-miR-664a-5p;NC_000012.12_26540;hsa-miR-6511b-5p;hsa-miR-22-5p;NC_000020.11_34751
AHNAK2	113146	hsa_circ_0053716	0.472727	2.41715e-22	18	hsa-miR-92a-3p;NC_000002.12_3238;hsa-miR-3662;hsa-miR-3155a;hsa-miR-7974;hsa-miR-302c-5p;NC_000003.12_9133;NC_000010.11_23303;NC_000001.11_3101;NC_000010.11_23646;hsa-miR-512-3p;hsa-miR-510-5p;hsa-miR-92a-1-5p;hsa-miR-15b-3p;hsa-miR-5585-3p;hsa-miR-1323;hsa-miR-372-5p;NC_000007.14_17821
CHAC1	79094	hsa_circ_0076332	0.459459	2.54271e-22	17	NC_000008.11_19445;hsa-miR-302a-5p;hsa-miR-3662;NC_000018.10_33742;hsa-miR-20a-5p;hsa-miR-573;NC_000010.11_23303;NC_000006.12_15769;NC_000012.12_26286;hsa-miR-3143;hsa-miR-27b-5p;NC_000003.12_7973;hsa-miR-18a-3p;hsa-miR-5585-3p;hsa-miR-17-5p;NC_000007.14_17821;hsa-miR-34c-5p
RBAK	57786	hsa_circ_0076332	0.486486	2.54271e-22	17	hsa-miR-302a-5p;hsa-miR-3662;NC_000003.12_7520;hsa-miR-520c-3p;hsa-miR-573;hsa-miR-20a-5p;NC_000010.11_23303;hsa-miR-373-5p;NC_000012.12_26286;hsa-miR-3143;NC_000003.12_7973;hsa-miR-15b-3p;hsa-miR-302b-5p;hsa-miR-1323;hsa-miR-372-5p;NC_000007.14_17821;hsa-miR-18a-3p
PDGFRA	5156	hsa_circ_0012566	0.6	2.61856e-22	13	hsa-miR-499a-5p;hsa-miR-24-3p;hsa-miR-181c-5p;hsa-miR-9-5p;hsa-miR-449c-5p;hsa-miR-664a-5p;hsa-miR-203a-3p;hsa-miR-181a-5p;hsa-miR-22-5p;NC_000010.11_22861;NC_000008.11_18787;hsa-miR-6511b-5p;NC_000009.12_21531
TNFRSF19	55504	hsa_circ_0012566	0.56	2.61856e-22	13	hsa-miR-30d-5p;hsa-miR-499a-5p;hsa-miR-193a-5p;NC_000003.12_9115;hsa-miR-24-3p;hsa-miR-22-3p;hsa-miR-449c-5p;hsa-miR-9-5p;hsa-miR-203a-3p;hsa-miR-6511b-5p;NC_000010.11_22861;NC_000008.11_18787;NC_000011.10_23882
NRP2	8828	hsa_circ_0086848	0.489796	2.64297e-22	14	hsa-miR-328-3p;hsa-miR-193a-5p;hsa-miR-6842-3p;hsa-miR-9-5p;hsa-miR-22-3p;hsa-miR-3929;hsa-miR-4435;hsa-miR-98-5p;hsa-miR-203a-3p;hsa-miR-6511b-5p;hsa-miR-22-5p;NC_000011.10_23882;NC_000010.11_22861;hsa-miR-4443
GINS1	9837	hsa_circ_0052203	0.361111	2.6627e-22	12	NC_000024.10_38844;hsa-miR-6842-3p;hsa-miR-6807-5p;NC_000002.12_3880;hsa-miR-449c-5p;hsa-miR-3929;hsa-miR-98-5p;hsa-miR-148a-3p;hsa-miR-6511b-5p;hsa-miR-22-5p;NC_000020.11_34751;NC_000009.12_21531
HEG1	57493	hsa_circ_0012566	0.64	2.72739e-22	14	NC_000003.12_9115;NW_003315954.1_39634;hsa-miR-24-3p;hsa-miR-181c-5p;hsa-miR-9-5p;hsa-miR-22-3p;hsa-miR-664a-5p;hsa-miR-203a-3p;hsa-miR-181a-5p;hsa-miR-22-5p;NC_000016.10_31515;NC_000008.11_18787;hsa-miR-6511b-5p;NC_000009.12_21531
GINS4	84296	hsa_circ_0008221	0.0408654	2.72739e-22	14	hsa-miR-328-3p;hsa-miR-193a-5p;hsa-miR-659-5p;hsa-miR-22-3p;hsa-miR-9-5p;hsa-miR-3929;hsa-miR-449c-5p;NC_000016.10_31213;hsa-miR-664a-5p;NC_000017.11_32431;NC_000010.11_22861;NC_000020.11_34751;hsa-miR-4443;NC_000009.12_21531
CDC7	8317	hsa_circ_0008221	0.0480769	2.72739e-22	14	hsa-miR-30d-5p;hsa-miR-499a-5p;hsa-miR-155-5p;hsa-miR-193a-5p;NC_000003.12_9115;hsa-miR-215-5p;hsa-miR-24-3p;hsa-miR-369-3p;hsa-miR-9-5p;hsa-miR-98-5p;NC_000017.11_32431;hsa-miR-203a-3p;NC_000011.10_23882;NC_000011.10_24785
TMPO	7112	hsa_circ_0008221	0.0576923	2.72739e-22	14	hsa-miR-328-3p;hsa-miR-30d-5p;hsa-miR-193a-5p;hsa-miR-27a-3p;hsa-miR-6842-3p;hsa-miR-9-5p;NC_000002.12_3880;hsa-miR-3929;hsa-miR-98-5p;hsa-miR-22-5p;hsa-miR-6511b-5p;NC_000016.10_31515;NC_000020.11_34751;NC_000009.12_21531
ERRFI1	54206	hsa_circ_0059713	0.463415	2.75526e-22	18	NC_000006.12_16700;NC_000021.9_35751;hsa-miR-7974;hsa-miR-526b-5p;NC_000016.10_31157;NC_000003.12_9133;hsa-miR-20a-5p;NC_000011.10_25384;hsa-miR-373-5p;hsa-miR-7-5p;NC_000008.11_20037;NC_000009.12_21925;hsa-miR-372-5p;NC_000002.12_3238;hsa-miR-205-5p;hsa-miR-3529-3p;hsa-miR-3662;NC_000006.12_15769
DOPEY2	9980	hsa_circ_0076332	0.513514	2.80385e-22	18	NC_000013.11_27627;NC_000008.11_19445;hsa-miR-302a-5p;hsa-miR-3662;hsa-miR-520c-3p;hsa-miR-20a-5p;NC_000010.11_23303;hsa-miR-512-3p;hsa-miR-373-5p;NC_000012.12_26286;hsa-miR-3143;hsa-miR-27b-5p;NC_000003.12_8583;hsa-miR-372-5p;hsa-miR-1323;hsa-miR-17-5p;NC_000007.14_17821;hsa-miR-34c-5p
TDP1	55775	hsa_circ_0059354	0.333333	2.91995e-22	14	hsa-miR-27a-3p;NC_000024.10_38844;hsa-miR-24-3p;hsa-miR-181c-5p;hsa-miR-22-3p;NC_000002.12_3880;hsa-miR-98-5p;hsa-miR-4758-3p;NC_000017.11_32431;hsa-miR-181a-5p;hsa-miR-22-5p;NC_000011.10_24785;NC_000010.11_22861;hsa-miR-4443
POLQ	10721	hsa_circ_0014557	0.736842	2.94523e-22	12	hsa-miR-30d-5p;hsa-miR-27a-3p;hsa-miR-6842-3p;hsa-miR-9-5p;NC_000002.12_3880;hsa-miR-98-5p;NC_000017.11_32431;NC_000017.11_32431*;hsa-miR-181a-5p;hsa-miR-6511b-5p;hsa-miR-22-5p;NC_000011.10_23882
NUDT21	11051	hsa_circ_0030467	0.297872	2.94523e-22	12	hsa-miR-499a-5p;hsa-miR-21-5p;hsa-miR-181c-5p;NC_000002.12_3880;hsa-miR-22-3p;NC_000011.10_23807;hsa-miR-4435;hsa-miR-664a-5p;hsa-miR-9-5p;hsa-miR-203a-3p;hsa-miR-22-5p;NC_000009.12_21531
POP1	10940	hsa_circ_0014557	0.736842	2.94523e-22	12	hsa-miR-30d-5p;hsa-miR-27a-3p;hsa-miR-6842-3p;hsa-miR-9-5p;NC_000002.12_3880;hsa-miR-98-5p;NC_000017.11_32431;NC_000023.11_37419;hsa-miR-181a-5p;hsa-miR-215-3p;hsa-miR-22-5p;hsa-miR-6511b-5p
POLQ	10721	hsa_circ_0030467	0.446809	2.94523e-22	12	hsa-miR-499a-5p;hsa-miR-181c-5p;NC_000002.12_3880;hsa-miR-22-3p;NC_000011.10_23807;hsa-miR-4435;hsa-miR-664a-5p;hsa-miR-9-5p;hsa-miR-203a-3p;hsa-miR-22-5p;hsa-miR-6761-5p;NC_000009.12_21531
ISL1	3670	hsa_circ_0013529	0.846154	2.99402e-22	11	hsa-miR-30d-5p;NC_000003.12_9115;hsa-miR-27a-3p;hsa-miR-6842-3p;hsa-miR-369-3p;hsa-miR-22-3p;hsa-miR-9-5p;hsa-miR-3929;hsa-miR-664a-5p;hsa-miR-203a-3p;NC_000010.11_22289
PLK4	10733	hsa_circ_0086848	0.265306	3.11836e-22	13	hsa-miR-328-3p;hsa-miR-24-3p;hsa-miR-659-5p;hsa-miR-369-3p;hsa-miR-9-5p;hsa-miR-3929;hsa-miR-98-5p;hsa-miR-148a-3p;NC_000017.11_32431;hsa-miR-203a-3p;hsa-miR-22-5p;NC_000011.10_23882;hsa-miR-183-5p
GATM	2628	hsa_circ_0086848	0.346939	3.11836e-22	13	hsa-miR-328-3p;hsa-miR-193a-5p;hsa-miR-24-3p;hsa-miR-659-5p;NC_000005.10_13790;hsa-miR-9-5p;hsa-miR-22-3p;hsa-miR-449c-5p;hsa-miR-369-3p;hsa-miR-4435;hsa-miR-98-5p;NC_000019.10_34428;hsa-miR-203a-3p
H2AFV	94239	hsa_circ_0086848	0.367347	3.11836e-22	13	hsa-miR-193a-5p;hsa-miR-6842-3p;NC_000005.10_13790;hsa-miR-9-5p;hsa-miR-22-3p;hsa-miR-3929;hsa-miR-449c-5p;hsa-miR-369-3p;hsa-miR-98-5p;hsa-miR-203a-3p;hsa-miR-6511b-5p;NC_000011.10_23882;hsa-miR-183-5p
FIGN	55137	hsa_circ_0038178	0.714286	3.33898e-22	13	hsa-miR-27a-3p;hsa-miR-24-3p;hsa-miR-6842-3p;hsa-miR-181c-5p;NC_000002.12_3880;hsa-miR-9-5p;hsa-miR-3929;hsa-miR-4435;hsa-miR-664a-5p;NC_000017.11_32431;hsa-miR-181a-5p;hsa-miR-6511b-5p;hsa-miR-22-5p
RHBDD1	84236	hsa_circ_0053716	0.345455	3.34536e-22	18	hsa-miR-520a-3p;hsa-miR-92a-3p;NC_000002.12_3238;hsa-miR-3662;hsa-miR-7974;NC_000023.11_38289;hsa-miR-302c-5p;NC_000003.12_9133;hsa-let-7c-5p;hsa-miR-510-5p;NC_000018.10_33504*;hsa-miR-92a-1-5p;hsa-miR-302b-5p;hsa-miR-15b-3p;hsa-miR-5585-3p;hsa-miR-1323;hsa-miR-3529-3p;NC_000007.14_17821
FST	10468	hsa_circ_0059354	0.333333	3.39938e-22	13	hsa-miR-30d-5p;hsa-miR-193a-5p;hsa-miR-24-3p;hsa-miR-6842-3p;hsa-miR-22-3p;NC_000002.12_3880;hsa-miR-3929;hsa-miR-148a-3p;NC_000017.11_32431;hsa-miR-181a-5p;hsa-miR-6511b-5p;hsa-miR-22-5p;NC_000011.10_24785
RASGEF1B	153020	hsa_circ_0059354	0.311111	3.39938e-22	13	hsa-miR-30d-5p;hsa-miR-193a-5p;NC_000014.9_29046;hsa-miR-27a-3p;NC_000024.10_38844;hsa-miR-24-3p;hsa-miR-9-5p;hsa-miR-22-3p;hsa-miR-3929;hsa-miR-4758-3p;NC_000017.11_32431;hsa-miR-6511b-5p;NC_000011.10_24785
MCM5	4174	hsa_circ_0059354	0.355556	3.39938e-22	13	hsa-miR-193a-5p;NC_000014.9_29046;hsa-miR-24-3p;hsa-miR-6842-3p;hsa-miR-181c-5p;hsa-miR-9-5p;hsa-miR-449c-5p;hsa-miR-22-3p;hsa-miR-148a-3p;hsa-miR-181a-5p;hsa-miR-6511b-5p;hsa-miR-22-5p;NC_000011.10_24785
BTN3A2	11118	hsa_circ_0052203	0.416667	3.39938e-22	13	hsa-miR-26b-5p;hsa-miR-6842-3p;hsa-miR-6807-5p;hsa-miR-449c-5p;hsa-miR-3929;hsa-miR-4435;NC_000017.11_32431;NC_000017.11_32431*;hsa-miR-6511b-5p;hsa-miR-642a-5p;hsa-miR-22-5p;NC_000011.10_24785;hsa-miR-4443
RAD51	5888	hsa_circ_0052203	0.416667	3.39938e-22	13	NC_000024.10_38844;hsa-miR-6842-3p;hsa-miR-22-3p;hsa-miR-449c-5p;hsa-miR-3929;NC_000002.12_3880;hsa-miR-148a-3p;NC_000017.11_32431;hsa-miR-642a-5p;NC_000010.11_22861;NC_000010.11_22289;NC_000020.11_34751;NC_000009.12_21531
MAGED1	9500	hsa_circ_0052203	0.416667	3.39938e-22	13	hsa-miR-26b-5p;hsa-miR-6807-5p;hsa-miR-181c-5p;hsa-miR-449c-5p;hsa-miR-3929;hsa-miR-4435;hsa-miR-98-5p;hsa-miR-642a-5p;hsa-miR-22-5p;NC_000011.10_24785;NC_000010.11_22289;NC_000010.11_22861;hsa-miR-4443
TACC3	10460	hsa_circ_0086848	0.346939	3.60718e-22	12	hsa-miR-328-3p;hsa-miR-193a-5p;hsa-miR-24-3p;hsa-miR-6842-3p;hsa-miR-9-5p;hsa-miR-22-3p;hsa-miR-3929;hsa-miR-4435;NC_000019.10_34428;hsa-miR-22-5p;NC_000010.11_22861;hsa-miR-183-5p
IL6R	3570	hsa_circ_0059713	0.439024	3.64278e-22	17	NC_000006.12_16700;hsa-miR-302a-5p;hsa-miR-3662;hsa-miR-7974;hsa-miR-573;hsa-miR-20a-5p;NC_000001.11_2997;NC_000011.10_25384;NC_000010.11_23646;hsa-miR-548i;hsa-miR-371a-5p;NC_000009.12_21925;NC_000002.12_3238;hsa-miR-7-5p;NC_000018.10_33037;hsa-miR-3529-3p;hsa-miR-34c-5p
TLCD2	727910	hsa_circ_0053716	0.4	3.65597e-22	17	NC_000007.14_17824;NC_000019.10_34542;hsa-miR-520a-3p;NC_000002.12_3238;hsa-miR-3662;hsa-miR-92a-3p;NC_000021.9_35751;hsa-miR-7974;hsa-let-7c-5p;NC_000003.12_9133;NC_000010.11_23303;hsa-miR-512-3p;hsa-miR-548i;NC_000018.10_33504*;hsa-miR-92a-1-5p;hsa-miR-5585-3p;NC_000007.14_17821
CIT	11113	hsa_circ_0052203	0.555556	3.79066e-22	14	NC_000014.9_29046;hsa-miR-6842-3p;hsa-miR-181c-5p;hsa-miR-22-3p;hsa-miR-98-5p;hsa-miR-4435;NC_000017.11_32431*;hsa-miR-6511b-5p;hsa-miR-642a-5p;hsa-miR-22-5p;NC_000011.10_24785;NC_000010.11_22861;NC_000020.11_34751;hsa-miR-4443
SMC1A	8243	hsa_circ_0030467	0.531915	3.80365e-22	13	hsa-miR-21-5p;NC_000011.10_23807;hsa-miR-181c-5p;NC_000002.12_3880;hsa-miR-22-3p;hsa-miR-3929;hsa-miR-4435;hsa-miR-664a-5p;hsa-miR-9-5p;hsa-miR-203a-3p;hsa-miR-22-5p;hsa-miR-6761-5p;NC_000009.12_21531
MGEA5	10724	hsa_circ_0076332	0.540541	3.81515e-22	18	hsa-miR-34c-5p;hsa-miR-302a-5p;NC_000003.12_7520;hsa-miR-3662;NC_000018.10_33742;hsa-miR-20a-5p;hsa-miR-512-3p;hsa-miR-373-5p;NC_000008.11_20037;NC_000012.12_26286;hsa-miR-3143;NC_000003.12_8583;hsa-miR-372-5p;NC_000006.12_15769;hsa-miR-1323;hsa-miR-17-5p;NC_000007.14_17821;hsa-miR-18a-3p
MYT1L	23040	hsa_circ_0029966	0.8125	3.91371e-22	12	hsa-miR-193a-5p;hsa-miR-30d-5p;hsa-miR-155-5p;hsa-miR-27a-3p;NC_000003.12_9115;hsa-miR-22-3p;hsa-miR-9-5p;NC_000016.10_31213;hsa-miR-664a-5p;hsa-miR-203a-3p;hsa-miR-22-5p;NC_000010.11_22861
RSAD2	91543	hsa_circ_0006957	0.0680272	4.03845e-22	14	hsa-miR-30d-5p;hsa-miR-21-5p;hsa-miR-193a-5p;hsa-miR-27a-3p;NC_000003.12_9115;hsa-miR-215-5p;hsa-miR-24-3p;hsa-miR-6807-5p;hsa-miR-9-5p;hsa-miR-449c-5p;hsa-miR-664a-5p;NC_000012.12_26540;hsa-miR-22-5p;NC_000020.11_34751
OAS2	4939	hsa_circ_0006957	0.0680272	4.03845e-22	14	hsa-miR-193a-5p;hsa-miR-21-5p;NC_000016.10_31515;hsa-miR-215-5p;hsa-miR-24-3p;hsa-miR-6807-5p;hsa-miR-9-5p;hsa-miR-449c-5p;NC_000016.10_31213;hsa-miR-664a-5p;hsa-miR-22-5p;NC_000010.11_22861;NC_000011.10_24785;NC_000020.11_34751
FIGN	55137	hsa_circ_0068582	0.857143	4.06547e-22	12	hsa-miR-30d-5p;NC_000003.12_9115;hsa-miR-27a-3p;hsa-miR-24-3p;hsa-miR-181c-5p;hsa-miR-9-5p;hsa-miR-98-5p;hsa-miR-664a-5p;hsa-miR-203a-3p;hsa-miR-181a-5p;hsa-miR-22-5p;NC_000011.10_24785
MAP2	4133	hsa_circ_0053716	0.454545	4.24408e-22	19	NC_000002.12_3238;hsa-miR-3662;hsa-miR-3155a;NC_000021.9_35751;hsa-miR-7974;hsa-miR-302c-5p;hsa-let-7c-5p;NC_000003.12_9133;NC_000010.11_23303;NC_000001.11_3101;NC_000010.11_23646;hsa-miR-512-3p;hsa-miR-510-5p;hsa-miR-302b-5p;NC_000008.11_20037;hsa-miR-15b-3p;hsa-miR-5585-3p;hsa-miR-372-5p;NC_000007.14_17821
OAS3	4940	hsa_circ_0012566	0.64	4.30574e-22	14	hsa-miR-499a-5p;hsa-miR-193a-5p;NW_003315954.1_39634;hsa-miR-24-3p;hsa-miR-181c-5p;hsa-miR-9-5p;hsa-miR-22-3p;hsa-miR-449c-5p;hsa-miR-664a-5p;hsa-miR-203a-3p;hsa-miR-6511b-5p;hsa-miR-22-5p;NC_000008.11_18787;NC_000009.12_21531
LBR	3930	hsa_circ_0012566	0.48	4.30828e-22	12	hsa-miR-30d-5p;hsa-miR-499a-5p;NC_000003.12_9115;hsa-miR-24-3p;hsa-miR-181c-5p;hsa-miR-9-5p;hsa-miR-449c-5p;hsa-miR-664a-5p;hsa-miR-203a-3p;hsa-miR-181a-5p;NC_000008.11_18787;NC_000009.12_21531
TTBK2	146057	hsa_circ_0045194	0.842105	4.82193e-22	15	NC_000012.12_25887;NC_000020.11_35116;hsa-miR-3155a;hsa-miR-26a-1-3p;NC_000003.12_9133;NC_000022.11_36437;hsa-miR-510-5p;hsa-miR-92a-1-5p;NC_000005.10_14158;hsa-miR-3143;hsa-miR-526b-5p;hsa-miR-7-5p;NC_000007.14_17821;hsa-miR-3662;NC_000006.12_15769
IFIT1	3434	hsa_circ_0012566	0.52	4.87204e-22	13	hsa-miR-30d-5p;hsa-miR-499a-5p;hsa-miR-193a-5p;NC_000003.12_9115;hsa-miR-9-5p;hsa-miR-449c-5p;hsa-miR-664a-5p;hsa-miR-203a-3p;hsa-miR-22-5p;NC_000010.11_22861;NC_000008.11_18787;NC_000011.10_23882;NC_000009.12_21531
NUDT21	11051	hsa_circ_0012566	0.56	4.87204e-22	13	hsa-miR-499a-5p;hsa-miR-21-5p;hsa-miR-181c-5p;hsa-miR-22-3p;hsa-miR-9-5p;hsa-miR-664a-5p;hsa-miR-203a-3p;hsa-miR-181a-5p;hsa-miR-6511b-5p;hsa-miR-22-5p;NC_000008.11_18787;NC_000011.10_23882;NC_000009.12_21531
ALDH7A1	501	hsa_circ_0014557	0.736842	5.01698e-22	12	hsa-miR-27a-3p;hsa-miR-6842-3p;hsa-miR-9-5p;NC_000002.12_3880;hsa-miR-98-5p;NC_000017.11_32431;NC_000023.11_37419;hsa-miR-181a-5p;hsa-miR-215-3p;hsa-miR-22-5p;hsa-miR-1301-3p;hsa-miR-3189-3p
ASPM	259266	hsa_circ_0059354	0.444444	5.05113e-22	14	hsa-miR-30d-5p;hsa-miR-27a-3p;hsa-miR-24-3p;hsa-miR-181c-5p;hsa-miR-9-5p;hsa-miR-22-3p;hsa-miR-3929;NC_000002.12_3880;NC_000017.11_32431;hsa-miR-181a-5p;hsa-miR-6511b-5p;hsa-miR-22-5p;hsa-miR-215-3p;NC_000011.10_24785
GPR26	2849	hsa_circ_0059354	0.488889	5.05113e-22	14	hsa-miR-30d-5p;hsa-miR-193a-5p;NC_000014.9_29046;hsa-miR-27a-3p;hsa-miR-24-3p;hsa-miR-6842-3p;hsa-miR-9-5p;hsa-miR-449c-5p;hsa-miR-3929;NC_000002.12_3880;hsa-miR-98-5p;NC_000017.11_32431;hsa-miR-181a-5p;NC_000011.10_24785
PRKCQ	5588	hsa_circ_0059354	0.311111	5.05113e-22	14	hsa-miR-30d-5p;NC_000024.10_38844;hsa-miR-181c-5p;hsa-miR-22-3p;NC_000002.12_3880;hsa-miR-3929;hsa-miR-4758-3p;NC_000017.11_32431;hsa-miR-181a-5p;hsa-miR-22-5p;NC_000010.11_22861;hsa-miR-215-3p;NC_000011.10_24785;hsa-miR-4443
REG4	83998	hsa_circ_0059354	0.311111	5.10952e-22	12	NC_000024.10_38844;hsa-miR-24-3p;hsa-miR-6842-3p;hsa-miR-181c-5p;hsa-miR-9-5p;hsa-miR-449c-5p;hsa-miR-3929;hsa-miR-181a-5p;hsa-miR-6511b-5p;hsa-miR-22-5p;NC_000011.10_24785;hsa-miR-4443
POLA1	5422	hsa_circ_0059354	0.333333	5.10952e-22	12	hsa-miR-193a-5p;hsa-miR-30d-5p;hsa-miR-27a-3p;hsa-miR-6842-3p;hsa-miR-181c-5p;hsa-miR-22-3p;hsa-miR-9-5p;hsa-miR-98-5p;hsa-miR-181a-5p;hsa-miR-22-5p;NC_000011.10_24785;hsa-miR-4443
BTN3A2	11118	hsa_circ_0038178	0.5	5.10952e-22	12	hsa-miR-27a-3p;hsa-miR-24-3p;hsa-miR-6842-3p;hsa-miR-9-5p;hsa-miR-3929;hsa-miR-4435;NC_000017.11_32431;hsa-miR-181a-5p;hsa-miR-642a-5p;hsa-miR-22-5p;hsa-miR-6511b-5p;hsa-miR-4443
MKI67	4288	hsa_circ_0038178	0.607143	5.21673e-22	13	hsa-miR-27a-3p;hsa-miR-24-3p;hsa-miR-6842-3p;hsa-miR-181c-5p;NC_000002.12_3880;hsa-miR-9-5p;hsa-miR-4435;NC_000012.12_26540;NC_000017.11_32431;hsa-miR-181a-5p;hsa-miR-6511b-5p;hsa-miR-22-5p;hsa-miR-4443
RFC3	5983	hsa_circ_0038178	0.607143	5.21673e-22	13	hsa-miR-27a-3p;hsa-miR-24-3p;hsa-miR-6842-3p;hsa-miR-9-5p;hsa-miR-3929;hsa-miR-4435;hsa-miR-664a-5p;NC_000012.12_26540;NC_000017.11_32431;hsa-miR-181a-5p;hsa-miR-6511b-5p;hsa-miR-22-5p;hsa-miR-4443
ZEB1	6935	hsa_circ_0076332	0.486486	5.31533e-22	17	NC_000013.11_27627;NC_000008.11_19445;hsa-miR-520c-3p;NC_000008.11_20037*;NC_000018.10_33742;hsa-miR-573;hsa-miR-20a-5p;hsa-miR-18a-3p;NC_000008.11_20037;NC_000012.12_26286;hsa-miR-3143;hsa-miR-15b-3p;NC_000006.12_15769;hsa-miR-1323;hsa-miR-372-5p;hsa-miR-34c-5p;hsa-miR-522-3p
LIPH	200879	hsa_circ_0053716	0.327273	5.35238e-22	17	NC_000007.14_17824;hsa-miR-92a-3p;NC_000002.12_3238;hsa-miR-3155a;NC_000021.9_35751;hsa-let-7c-5p;hsa-miR-302c-5p;NC_000003.12_9133;hsa-miR-548i;hsa-miR-92a-1-5p;hsa-miR-510-5p;hsa-miR-15b-3p;hsa-miR-5585-3p;hsa-miR-1323;hsa-miR-372-5p;hsa-miR-3529-3p;hsa-miR-3662
OGDH	4967	hsa_circ_0059713	0.487805	5.60275e-22	17	NC_000006.12_16700;hsa-miR-302a-5p;NC_000023.11_36905;hsa-miR-3662;hsa-miR-7974;hsa-miR-573;hsa-miR-526b-5p;hsa-miR-20a-5p;hsa-miR-7-5p;hsa-miR-371a-5p;NC_000009.12_21925;hsa-miR-372-5p;NC_000002.12_3238;hsa-miR-205-5p;hsa-miR-3529-3p;hsa-miR-34c-5p;NC_000006.12_15769
ABCC3	8714	hsa_circ_0059713	0.439024	5.60275e-22	17	hsa-miR-302a-5p;NC_000023.11_36905;NC_000021.9_35751;hsa-miR-7974;hsa-miR-573;hsa-miR-526b-5p;hsa-miR-20a-5p;NC_000010.11_23646;NC_000022.11_36437;hsa-miR-373-5p;hsa-miR-7-5p;hsa-miR-371a-5p;NC_000009.12_21925;NC_000002.12_3238;hsa-miR-205-5p;NC_000005.10_11919>NC_000005.10_11920;hsa-miR-34c-5p
RNF14	9604	hsa_circ_0059713	0.512195	5.67625e-22	18	NC_000023.11_36905;hsa-miR-3662;hsa-miR-526b-5p;hsa-miR-573;hsa-miR-20a-5p;NC_000003.12_9133;NC_000010.11_23646;hsa-miR-373-5p;hsa-miR-7-5p;NC_000008.11_20037;NC_000003.12_7276;hsa-miR-1323;NC_000002.12_3238;NC_000022.11_36437;NC_000018.10_33037;hsa-miR-372-5p;hsa-miR-34c-5p;NC_000006.12_15769
NMNAT1	64802	hsa_circ_0059713	0.463415	5.67625e-22	18	NC_000006.12_16700;hsa-miR-92a-3p;hsa-miR-302a-5p;NC_000021.9_35751;hsa-miR-526b-5p;NC_000016.10_31157;hsa-miR-20a-5p;NC_000010.11_23646;hsa-miR-373-5p;hsa-miR-548i;NC_000018.10_33504*;hsa-miR-7-5p;hsa-miR-371a-5p;NC_000002.12_3238;hsa-miR-205-5p;hsa-miR-372-5p;hsa-miR-3662;NC_000006.12_15769
CFTR	1080	hsa_circ_0086848	0.408163	5.99219e-22	13	hsa-miR-193a-5p;hsa-miR-6842-3p;hsa-miR-369-3p;hsa-miR-9-5p;hsa-miR-22-3p;hsa-miR-3929;hsa-miR-4435;hsa-miR-98-5p;NC_000017.11_32431;NC_000019.10_34428;hsa-miR-203a-3p;hsa-miR-22-5p;NC_000010.11_22861
TOP2A	7153	hsa_circ_0086848	0.306122	5.99219e-22	13	hsa-miR-193a-5p;hsa-miR-659-5p;hsa-miR-6842-3p;NC_000005.10_13790;hsa-miR-9-5p;hsa-miR-369-3p;hsa-miR-3929;NC_000019.10_34428;hsa-miR-203a-3p;hsa-miR-6511b-5p;hsa-miR-22-5p;NC_000011.10_23882;hsa-miR-183-5p
CNTRL	11064	hsa_circ_0086848	0.510204	5.99219e-22	13	hsa-miR-193a-5p;hsa-miR-24-3p;hsa-miR-6842-3p;hsa-miR-9-5p;hsa-miR-22-3p;hsa-miR-3929;hsa-miR-98-5p;hsa-miR-203a-3p;hsa-miR-6511b-5p;hsa-miR-22-5p;NC_000011.10_23882;NC_000010.11_22861;hsa-miR-4443
FIGN	55137	hsa_circ_0052203	0.472222	6.2947e-22	14	hsa-miR-6842-3p;hsa-miR-181c-5p;hsa-miR-22-3p;NC_000002.12_3880;hsa-miR-3929;hsa-miR-4435;hsa-miR-98-5p;NC_000017.11_32431;NC_000017.11_32431*;hsa-miR-6511b-5p;hsa-miR-22-5p;NC_000011.10_24785;NC_000020.11_34751;NC_000009.12_21531
RGS5	8490	hsa_circ_0052203	0.416667	6.77169e-22	13	NC_000024.10_38844;hsa-miR-6842-3p;hsa-miR-6807-5p;hsa-miR-181c-5p;NC_000002.12_3880;hsa-miR-449c-5p;hsa-miR-3929;NC_000017.11_32431*;hsa-miR-6511b-5p;hsa-miR-22-5p;NC_000011.10_24785;NC_000010.11_22289;NC_000009.12_21531
RRM2	6241	hsa_circ_0052203	0.416667	6.77169e-22	13	NC_000014.9_29046;NC_000024.10_38844;hsa-miR-6842-3p;NC_000002.12_3880;hsa-miR-3929;hsa-miR-4435;hsa-miR-98-5p;hsa-miR-148a-3p;NC_000017.11_32431*;hsa-miR-22-5p;NC_000011.10_24785;NC_000010.11_22861;hsa-miR-4443
SERTAD4	56256	hsa_circ_0052203	0.388889	6.77169e-22	13	NC_000024.10_38844;hsa-miR-6842-3p;hsa-miR-6807-5p;hsa-miR-181c-5p;NC_000017.11_32431;NC_000017.11_32431*;hsa-miR-6511b-5p;hsa-miR-22-5p;NC_000011.10_24785;NC_000010.11_22861;NC_000020.11_34751;hsa-miR-4443;NC_000009.12_21531
HELLS	3070	hsa_circ_0086848	0.510204	6.91172e-22	14	hsa-miR-328-3p;hsa-miR-193a-5p;hsa-miR-24-3p;hsa-miR-659-5p;hsa-miR-6842-3p;hsa-miR-369-3p;hsa-miR-9-5p;hsa-miR-3929;hsa-miR-98-5p;NC_000017.11_32431;hsa-miR-203a-3p;hsa-miR-6511b-5p;NC_000010.11_22861;hsa-miR-4443
HEG1	57493	hsa_circ_0086848	0.469388	6.91172e-22	14	hsa-miR-328-3p;hsa-miR-24-3p;hsa-miR-659-5p;hsa-miR-6842-3p;hsa-miR-369-3p;hsa-miR-9-5p;hsa-miR-22-3p;hsa-miR-3929;hsa-miR-98-5p;NC_000017.11_32431;hsa-miR-203a-3p;hsa-miR-6511b-5p;hsa-miR-22-5p;hsa-miR-4443
MTFR2	113115	hsa_circ_0008221	0.0528846	6.91172e-22	14	hsa-miR-499a-5p;hsa-miR-21-5p;hsa-miR-193a-5p;hsa-miR-27a-3p;hsa-miR-6842-3p;hsa-miR-181c-5p;hsa-miR-9-5p;hsa-miR-369-3p;hsa-miR-3929;hsa-miR-98-5p;NC_000017.11_32431;hsa-miR-203a-3p;hsa-miR-6511b-5p;NC_000010.11_22861
CENPI	2491	hsa_circ_0008221	0.0576923	6.91172e-22	14	hsa-miR-27a-3p;hsa-miR-659-5p;hsa-miR-6842-3p;hsa-miR-181c-5p;hsa-miR-9-5p;hsa-miR-3929;hsa-miR-98-5p;NC_000017.11_32431;hsa-miR-203a-3p;hsa-miR-181a-5p;hsa-miR-22-5p;NC_000010.11_22861;hsa-miR-6511b-5p;NC_000020.11_34751
CENPP	401541	hsa_circ_0008221	0.0384615	6.91172e-22	14	hsa-miR-193a-5p;hsa-miR-21-5p;NC_000014.9_29046;NC_000016.10_31515;hsa-miR-6842-3p;hsa-miR-9-5p;hsa-miR-449c-5p;hsa-miR-3929;hsa-miR-98-5p;NC_000019.10_34428;hsa-miR-203a-3p;hsa-miR-6511b-5p;hsa-miR-22-5p;hsa-miR-4443
MKI67	4288	hsa_circ_0037864	1	7.02303e-22	11	hsa-miR-193a-5p;hsa-miR-27a-3p;NC_000005.10_13790;hsa-miR-9-5p;NC_000002.12_3880;hsa-miR-22-3p;hsa-miR-98-5p;NC_000017.11_32431;hsa-miR-203a-3p;NC_000020.11_34751;NC_000009.12_21531
BTN3A2	11118	hsa_circ_0059354	0.355556	7.05129e-22	13	hsa-miR-193a-5p;hsa-miR-27a-3p;hsa-miR-24-3p;hsa-miR-6842-3p;hsa-miR-9-5p;hsa-miR-449c-5p;hsa-miR-3929;NC_000017.11_32431;hsa-miR-181a-5p;hsa-miR-6511b-5p;hsa-miR-22-5p;NC_000011.10_24785;hsa-miR-4443
RBKS	64080	hsa_circ_0059713	0.390244	7.05346e-22	16	NC_000006.12_16700;hsa-miR-302a-5p;hsa-miR-3662;NC_000021.9_35751;hsa-miR-7974;hsa-miR-573;NC_000009.12_21957;NC_000003.12_9133;hsa-miR-20a-5p;NC_000010.11_23646;hsa-miR-373-5p;hsa-miR-548i;hsa-miR-7-5p;hsa-miR-371a-5p;hsa-miR-205-5p;NC_000005.10_11919>NC_000005.10_11920
TRMT5	57570	hsa_circ_0006957	0.0748299	7.32933e-22	14	hsa-miR-30d-5p;hsa-miR-193a-5p;hsa-miR-155-5p;hsa-miR-27a-3p;NC_000003.12_9115;hsa-miR-24-3p;hsa-miR-9-5p;hsa-miR-449c-5p;hsa-miR-22-3p;hsa-miR-664a-5p;NC_000012.12_26540;hsa-miR-22-5p;NC_000016.10_31515;NC_000011.10_23882
NCAPD3	23310	hsa_circ_0006957	0.0986395	7.32933e-22	14	hsa-miR-193a-5p;hsa-miR-21-5p;hsa-miR-27a-3p;hsa-miR-24-3p;hsa-miR-22-3p;hsa-miR-449c-5p;hsa-miR-3929;hsa-miR-9-5p;NC_000012.12_26540;NC_000019.10_34428;hsa-miR-22-5p;NC_000010.11_22861;NC_000011.10_23882;NC_000011.10_24785
E2F2	1870	hsa_circ_0006957	0.0782313	7.32933e-22	14	hsa-miR-193a-5p;NC_000014.9_29046;hsa-miR-155-5p;hsa-miR-27a-3p;hsa-miR-24-3p;hsa-miR-659-5p;hsa-miR-6807-5p;hsa-miR-9-5p;hsa-miR-22-3p;hsa-miR-3929;NC_000019.10_34428;hsa-miR-22-5p;NC_000011.10_24785;NC_000020.11_34751
ANXA4	307	hsa_circ_0076332	0.405405	7.55524e-22	15	hsa-miR-34c-5p;hsa-miR-3662;NC_000003.12_7520;NC_000018.10_33742;hsa-miR-573;hsa-miR-20a-5p;NC_000010.11_23303;NC_000012.12_26286;hsa-miR-27b-5p;NC_000003.12_7973;NC_000006.12_15769;hsa-miR-1323;hsa-miR-372-5p;NC_000007.14_17821;hsa-miR-18a-3p
SEC24D	9871	hsa_circ_0059713	0.414634	7.55524e-22	15	NC_000023.11_36905;hsa-miR-3662;hsa-miR-7974;hsa-miR-573;hsa-miR-20a-5p;NC_000003.12_9133;hsa-miR-582-5p;NC_000009.12_21925;NC_000005.10_11919>NC_000005.10_11920;hsa-miR-1323;NC_000006.12_15769;hsa-miR-7-5p;NC_000018.10_33037;hsa-miR-3529-3p;hsa-miR-34c-5p
ROR1	4919	hsa_circ_0013529	0.923077	7.61091e-22	11	hsa-miR-30d-5p;NC_000003.12_9115;hsa-miR-27a-3p;hsa-miR-6842-3p;hsa-miR-369-3p;hsa-miR-22-3p;hsa-miR-9-5p;hsa-miR-3929;hsa-miR-664a-5p;hsa-miR-203a-3p;hsa-miR-181a-5p
HELLS	3070	hsa_circ_0038178	0.714286	8.02783e-22	13	hsa-miR-27a-3p;hsa-miR-24-3p;hsa-miR-6842-3p;hsa-miR-181c-5p;NC_000002.12_3880;hsa-miR-9-5p;hsa-miR-3929;hsa-miR-664a-5p;NC_000012.12_26540;NC_000017.11_32431;hsa-miR-181a-5p;hsa-miR-6511b-5p;hsa-miR-4443
NKX6-3	157848	hsa_circ_0008221	0.0480769	8.02783e-22	13	hsa-miR-328-3p;hsa-miR-193a-5p;NC_000014.9_29046;hsa-miR-27a-3p;hsa-miR-24-3p;hsa-miR-659-5p;hsa-miR-22-3p;hsa-miR-3929;NC_000019.10_34428;hsa-miR-6511b-5p;hsa-miR-22-5p;NC_000010.11_22861;hsa-miR-4443
PARPBP	55010	hsa_circ_0008221	0.0408654	8.02783e-22	13	hsa-miR-30d-5p;hsa-miR-155-5p;hsa-miR-27a-3p;hsa-miR-659-5p;hsa-miR-9-5p;hsa-miR-22-3p;hsa-miR-3929;hsa-miR-664a-5p;NC_000017.11_32431;hsa-miR-203a-3p;hsa-miR-22-5p;NC_000011.10_24785;NC_000009.12_21531
NEK2	4751	hsa_circ_0008221	0.0456731	8.02783e-22	13	hsa-miR-499a-5p;hsa-miR-27a-3p;hsa-miR-6842-3p;hsa-miR-9-5p;hsa-miR-98-5p;hsa-miR-664a-5p;NC_000017.11_32431;NC_000019.10_34428;hsa-miR-203a-3p;hsa-miR-22-5p;NC_000011.10_23882;hsa-miR-4443;NC_000009.12_21531
BIRC5	332	hsa_circ_0008221	0.0480769	8.02783e-22	13	hsa-miR-24-3p;hsa-miR-6842-3p;hsa-miR-181c-5p;hsa-miR-449c-5p;hsa-miR-3929;hsa-miR-664a-5p;NC_000017.11_32431;hsa-miR-203a-3p;hsa-miR-181a-5p;hsa-miR-6511b-5p;NC_000010.11_22861;NC_000020.11_34751;NC_000009.12_21531
PPARGC1A	10891	hsa_circ_0012566	0.52	8.80177e-22	13	hsa-miR-30d-5p;hsa-miR-499a-5p;hsa-miR-193a-5p;NC_000003.12_9115;NC_000016.10_31515;hsa-miR-24-3p;hsa-miR-9-5p;hsa-miR-22-3p;NC_000016.10_31213;hsa-miR-203a-3p;hsa-miR-22-5p;NC_000010.11_22861;NC_000011.10_23882
PIWIL2	55124	hsa_circ_0012566	0.56	8.80177e-22	13	hsa-miR-30d-5p;hsa-miR-193a-5p;NC_000003.12_9115;hsa-miR-24-3p;hsa-miR-181c-5p;hsa-miR-9-5p;hsa-miR-22-3p;hsa-miR-181a-5p;hsa-miR-6511b-5p;hsa-miR-22-5p;NC_000011.10_23882;NC_000010.11_22861;NC_000009.12_21531
TMEM181	57583	hsa_circ_0076332	0.432432	8.95906e-22	16	hsa-miR-522-3p;NC_000013.11_27627;NC_000008.11_19445;hsa-miR-34c-5p;hsa-miR-520c-3p;hsa-miR-20a-5p;hsa-miR-373-5p;hsa-miR-3143;NC_000003.12_7973;hsa-miR-15b-3p;NC_000006.12_15769;hsa-miR-1323;hsa-miR-372-5p;hsa-miR-17-5p;NC_000007.14_17821;hsa-miR-18a-3p
TLE2	7089	hsa_circ_0086848	0.408163	8.98232e-22	12	hsa-miR-328-3p;hsa-miR-6842-3p;hsa-miR-369-3p;hsa-miR-22-3p;hsa-miR-449c-5p;hsa-miR-3929;hsa-miR-4435;hsa-miR-148a-3p;NC_000017.11_32431;NC_000019.10_34428;hsa-miR-6511b-5p;hsa-miR-4443
SSTR1	6751	hsa_circ_0086848	0.346939	8.98232e-22	12	hsa-miR-328-3p;hsa-miR-193a-5p;hsa-miR-24-3p;NC_000005.10_13790;hsa-miR-22-3p;hsa-miR-369-3p;hsa-miR-449c-5p;hsa-miR-4435;NC_000017.11_32431;NC_000019.10_34428;hsa-miR-203a-3p;NC_000011.10_23882
KLK7	5650	hsa_circ_0008221	0.0360577	9.0123e-22	12	hsa-miR-193a-5p;NC_000016.10_31515;NC_000002.12_3880;hsa-miR-449c-5p;hsa-miR-3929;hsa-miR-22-3p;hsa-miR-664a-5p;hsa-miR-181a-5p;hsa-miR-6511b-5p;hsa-miR-22-5p;NC_000011.10_24785;hsa-miR-4443
TMEM52B	120939	hsa_circ_0008221	0.0360577	9.0123e-22	12	hsa-miR-215-5p;hsa-miR-24-3p;hsa-miR-181c-5p;hsa-miR-369-3p;hsa-miR-449c-5p;hsa-miR-3929;hsa-miR-98-5p;NC_000017.11_32431;hsa-miR-181a-5p;hsa-miR-22-5p;NC_000011.10_23882;hsa-miR-4443
OASL	8638	hsa_circ_0008221	0.0456731	9.0123e-22	12	hsa-miR-21-5p;NC_000014.9_29046;hsa-miR-27a-3p;NC_000016.10_31515;hsa-miR-659-5p;hsa-miR-6842-3p;hsa-miR-22-3p;hsa-miR-6511b-5p;hsa-miR-22-5p;NC_000011.10_24785;NC_000010.11_22861;hsa-miR-4443
MTMR9	66036	hsa_circ_0076332	0.594595	9.31218e-22	18	NC_000013.11_27627;NC_000008.11_19445;hsa-miR-3662;hsa-miR-520c-3p;NC_000003.12_7520;NC_000008.11_20037*;hsa-miR-20a-5p;hsa-miR-512-3p;hsa-miR-373-5p;NC_000012.12_26286;hsa-miR-27b-5p;NC_000003.12_8583;hsa-miR-15b-3p;hsa-miR-1323;hsa-miR-372-5p;hsa-miR-17-5p;hsa-miR-34c-5p;hsa-miR-522-3p
CYP19A1	1588	hsa_circ_0012566	0.56	1.00165e-21	12	hsa-miR-193a-5p;hsa-miR-21-5p;hsa-miR-30d-5p;NC_000003.12_9115;hsa-miR-181c-5p;hsa-miR-22-3p;hsa-miR-449c-5p;hsa-miR-203a-3p;hsa-miR-181a-5p;hsa-miR-6511b-5p;hsa-miR-22-5p;NC_000011.10_23882
PRICKLE2	166336	hsa_circ_0030467	0.638298	1.08462e-21	13	hsa-miR-499a-5p;hsa-miR-21-5p;hsa-miR-181c-5p;NC_000002.12_3880;hsa-miR-22-3p;NC_000011.10_23807;hsa-miR-3929;hsa-miR-4435;hsa-miR-664a-5p;hsa-miR-9-5p;hsa-miR-203a-3p;hsa-miR-22-5p;NC_000009.12_21531
POP1	10940	hsa_circ_0086848	0.387755	1.11449e-21	13	hsa-miR-24-3p;hsa-miR-6842-3p;NC_000005.10_13790;hsa-miR-9-5p;hsa-miR-22-3p;hsa-miR-3929;hsa-miR-369-3p;hsa-miR-98-5p;NC_000017.11_32431;NC_000019.10_34428;hsa-miR-6511b-5p;hsa-miR-22-5p;hsa-miR-183-5p
CENPF	1063	hsa_circ_0086848	0.408163	1.11449e-21	13	hsa-miR-328-3p;hsa-miR-193a-5p;hsa-miR-24-3p;hsa-miR-659-5p;hsa-miR-6842-3p;NC_000005.10_13790;hsa-miR-9-5p;hsa-miR-4435;NC_000017.11_32431;hsa-miR-203a-3p;hsa-miR-6511b-5p;hsa-miR-22-5p;hsa-miR-4443
POLQ	10721	hsa_circ_0086848	0.428571	1.11449e-21	13	hsa-miR-328-3p;hsa-miR-193a-5p;hsa-miR-24-3p;hsa-miR-6842-3p;hsa-miR-9-5p;hsa-miR-22-3p;hsa-miR-98-5p;hsa-miR-4435;NC_000017.11_32431;hsa-miR-203a-3p;hsa-miR-6511b-5p;hsa-miR-22-5p;NC_000011.10_23882
KALRN	8997	hsa_circ_0013529	1	1.12337e-21	12	hsa-miR-30d-5p;NC_000003.12_9115;hsa-miR-27a-3p;hsa-miR-6842-3p;hsa-miR-369-3p;hsa-miR-22-3p;hsa-miR-9-5p;hsa-miR-3929;hsa-miR-664a-5p;hsa-miR-203a-3p;hsa-miR-181a-5p;NC_000010.11_22289
KALRN	8997	hsa_circ_0014115	1	1.12337e-21	12	hsa-miR-328-3p;NC_000014.9_29046;hsa-miR-27a-3p;hsa-miR-24-3p;hsa-miR-6842-3p;hsa-miR-22-3p;hsa-miR-449c-5p;hsa-miR-3929;NC_000019.10_34428;hsa-miR-22-5p;NC_000020.11_34751;hsa-miR-183-5p
SLC2A1	6513	hsa_circ_0053716	0.363636	1.1492e-21	16	NC_000007.14_17824;hsa-miR-520a-3p;NC_000002.12_3238;hsa-miR-3155a;NC_000021.9_35751;hsa-miR-7974;NC_000001.11_3101;hsa-miR-512-3p;hsa-miR-510-5p;NC_000018.10_33504*;NC_000009.12_20733;hsa-miR-92a-1-5p;hsa-miR-5585-3p;hsa-miR-1323;hsa-miR-3529-3p;hsa-miR-3662
REG4	83998	hsa_circ_0038178	0.392857	1.16336e-21	11	hsa-miR-24-3p;hsa-miR-6842-3p;hsa-miR-181c-5p;hsa-miR-9-5p;hsa-miR-3929;hsa-miR-4435;NC_000012.12_26540;hsa-miR-181a-5p;hsa-miR-6511b-5p;hsa-miR-22-5p;hsa-miR-4443
E2F2	1870	hsa_circ_0014115	0.846154	1.17927e-21	11	hsa-miR-328-3p;NC_000014.9_29046;hsa-miR-27a-3p;hsa-miR-24-3p;hsa-miR-6842-3p;hsa-miR-22-3p;hsa-miR-3929;NC_000019.10_34428;hsa-miR-22-5p;NC_000020.11_34751;hsa-miR-183-5p
BCOR	54880	hsa_circ_0013529	0.846154	1.17927e-21	11	hsa-miR-30d-5p;NC_000003.12_9115;hsa-miR-27a-3p;hsa-miR-6842-3p;hsa-miR-369-3p;hsa-miR-22-3p;hsa-miR-9-5p;hsa-miR-3929;hsa-miR-203a-3p;hsa-miR-181a-5p;NC_000010.11_22289
TRMT5	57570	hsa_circ_0013529	0.846154	1.17927e-21	11	hsa-miR-30d-5p;NC_000003.12_9115;hsa-miR-27a-3p;hsa-miR-6842-3p;hsa-miR-369-3p;hsa-miR-22-3p;hsa-miR-9-5p;hsa-miR-664a-5p;hsa-miR-203a-3p;hsa-miR-181a-5p;NC_000010.11_22289
CISH	1154	hsa_circ_0014115	0.923077	1.17927e-21	11	hsa-miR-328-3p;NC_000014.9_29046;hsa-miR-27a-3p;hsa-miR-24-3p;hsa-miR-6842-3p;hsa-miR-22-3p;hsa-miR-449c-5p;hsa-miR-3929;NC_000019.10_34428;hsa-miR-22-5p;hsa-miR-183-5p
PIK3CA	5290	hsa_circ_0045194	0.842105	1.21362e-21	15	NC_000012.12_25887;NC_000020.11_35116;hsa-miR-3155a;hsa-miR-26a-1-3p;NC_000003.12_9133;NC_000022.11_36437;hsa-miR-302b-5p;hsa-miR-7-5p;hsa-miR-92a-1-5p;hsa-miR-3143;hsa-miR-526b-5p;hsa-miR-205-5p;NC_000007.14_17821;hsa-miR-3662;NC_000006.12_15769
PPARA	5465	hsa_circ_0045194	0.789474	1.21362e-21	15	NC_000012.12_25887;NC_000020.11_35116;hsa-miR-3155a;hsa-miR-26a-1-3p;NC_000003.12_9133;NC_000022.11_36437;hsa-miR-510-5p;hsa-miR-302b-5p;NC_000005.10_14158;hsa-miR-92a-1-5p;hsa-miR-3143;hsa-miR-526b-5p;hsa-miR-7-5p;hsa-miR-3662;NC_000006.12_15769
SYNPO	11346	hsa_circ_0038178	0.5	1.21801e-21	13	hsa-miR-24-3p;hsa-miR-6842-3p;hsa-miR-181c-5p;hsa-miR-9-5p;NC_000002.12_3880;hsa-miR-3929;hsa-miR-4435;hsa-miR-664a-5p;NC_000017.11_32431;hsa-miR-181a-5p;hsa-miR-6511b-5p;hsa-miR-22-5p;hsa-miR-4443
MXI1	4601	hsa_circ_0059713	0.414634	1.28256e-21	17	NC_000006.12_16700;hsa-miR-3662;hsa-miR-7974;hsa-miR-573;NC_000016.10_31157;NC_000003.12_9133;hsa-miR-20a-5p;NC_000010.11_23646;hsa-miR-373-5p;hsa-miR-582-5p;hsa-miR-371a-5p;NC_000005.10_11919>NC_000005.10_11920;hsa-miR-372-5p;NC_000006.12_15769;NC_000018.10_33037;hsa-miR-3529-3p;hsa-miR-34c-5p
ZNF654	55279	hsa_circ_0076332	0.405405	1.28758e-21	15	NC_000013.11_27627;NC_000008.11_20037*;hsa-miR-20a-5p;hsa-miR-573;NC_000010.11_23303;hsa-miR-373-5p;NC_000008.11_20037;NC_000012.12_26286;NC_000003.12_7973;hsa-miR-15b-3p;hsa-miR-302b-5p;hsa-miR-1323;hsa-miR-372-5p;NC_000007.14_17821;hsa-miR-18a-3p
IGFBP5	3488	hsa_circ_0006957	0.0816327	1.29681e-21	14	NC_000014.9_29046;hsa-miR-155-5p;hsa-miR-24-3p;hsa-miR-659-5p;hsa-miR-6807-5p;NC_000001.11_1021;hsa-miR-449c-5p;hsa-miR-3929;hsa-miR-22-3p;hsa-miR-664a-5p;hsa-miR-22-5p;NC_000010.11_22861;NC_000011.10_23882;NC_000011.10_24785
MCM4	4173	hsa_circ_0006957	0.0680272	1.29681e-21	14	hsa-miR-193a-5p;NC_000014.9_29046;hsa-miR-27a-3p;hsa-miR-215-5p;hsa-miR-659-5p;hsa-miR-6807-5p;hsa-miR-22-3p;hsa-miR-449c-5p;hsa-miR-3929;hsa-miR-9-5p;hsa-miR-664a-5p;NC_000019.10_34428;NC_000010.11_22861;NC_000020.11_34751
RASGEF1B	153020	hsa_circ_0006957	0.0578231	1.30077e-21	13	hsa-miR-30d-5p;hsa-miR-193a-5p;NC_000014.9_29046;hsa-miR-27a-3p;NC_000003.12_9115;hsa-miR-24-3p;hsa-miR-9-5p;hsa-miR-22-3p;hsa-miR-3929;hsa-miR-664a-5p;NC_000011.10_23882;NC_000011.10_24785;NC_000020.11_34751
FXN	2395	hsa_circ_0052203	0.472222	1.30077e-21	13	NC_000014.9_29046;hsa-miR-6842-3p;hsa-miR-6807-5p;NC_000002.12_3880;hsa-miR-449c-5p;hsa-miR-3929;hsa-miR-98-5p;NC_000017.11_32431;hsa-miR-6511b-5p;NC_000010.11_22861;NC_000011.10_24785;NC_000020.11_34751;hsa-miR-4443
SYNPO	11346	hsa_circ_0068582	0.535714	1.31623e-21	12	hsa-miR-30d-5p;NC_000003.12_9115;hsa-miR-24-3p;hsa-miR-6807-5p;hsa-miR-181c-5p;hsa-miR-9-5p;hsa-miR-98-5p;hsa-miR-664a-5p;hsa-miR-203a-3p;hsa-miR-181a-5p;hsa-miR-22-5p;NC_000011.10_24785
BCOR	54880	hsa_circ_0014557	0.736842	1.36033e-21	12	hsa-miR-30d-5p;hsa-miR-27a-3p;hsa-miR-6842-3p;hsa-miR-9-5p;NC_000002.12_3880;hsa-miR-98-5p;NC_000017.11_32431;NC_000017.11_32431*;hsa-miR-181a-5p;hsa-miR-22-5p;hsa-miR-215-3p;hsa-miR-6511b-5p
RTKN2	219790	hsa_circ_0014557	0.736842	1.36033e-21	12	hsa-miR-30d-5p;hsa-miR-27a-3p;hsa-miR-6842-3p;hsa-miR-9-5p;NC_000002.12_3880;hsa-miR-98-5p;NC_000017.11_32431;hsa-miR-181a-5p;hsa-miR-22-5p;hsa-miR-215-3p;hsa-miR-6511b-5p;NC_000011.10_23882
SCYL2	55681	hsa_circ_0076332	0.432432	1.36611e-21	16	NC_000013.11_27627;NC_000008.11_19445;hsa-miR-34c-5p;hsa-miR-520c-3p;NC_000003.12_7520;NC_000008.11_20037*;hsa-miR-573;hsa-miR-20a-5p;NC_000010.11_23303;hsa-miR-373-5p;hsa-miR-15b-3p;NC_000006.12_15769;hsa-miR-372-5p;hsa-miR-17-5p;NC_000007.14_17821;hsa-miR-522-3p
OSTM1	28962	hsa_circ_0076332	0.486486	1.36611e-21	16	NC_000013.11_27627;NC_000008.11_19445;hsa-miR-3662;hsa-miR-520c-3p;NC_000008.11_20037*;hsa-miR-20a-5p;hsa-miR-512-3p;hsa-miR-373-5p;NC_000008.11_20037;hsa-miR-3143;hsa-miR-15b-3p;NC_000006.12_15769;hsa-miR-1323;hsa-miR-17-5p;NC_000007.14_17821;hsa-miR-522-3p
DTL	51514	hsa_circ_0059354	0.288889	1.3804e-21	12	hsa-miR-193a-5p;hsa-miR-24-3p;hsa-miR-6842-3p;NC_000002.12_3880;hsa-miR-449c-5p;hsa-miR-3929;hsa-miR-9-5p;hsa-miR-98-5p;hsa-miR-22-5p;NC_000011.10_24785;NC_000010.11_22861;hsa-miR-4443
CROT	54677	hsa_circ_0059354	0.355556	1.3804e-21	12	hsa-miR-30d-5p;hsa-miR-181c-5p;NC_000002.12_3880;hsa-miR-22-3p;NC_000016.10_31213;hsa-miR-3929;hsa-miR-9-5p;hsa-miR-98-5p;NC_000017.11_32431;hsa-miR-181a-5p;hsa-miR-22-5p;hsa-miR-4443
HMGB1	3146	hsa_circ_0059354	0.333333	1.40413e-21	13	hsa-miR-30d-5p;hsa-miR-24-3p;hsa-miR-181c-5p;hsa-miR-9-5p;hsa-miR-449c-5p;NC_000002.12_3880;hsa-miR-98-5p;NC_000017.11_32431;hsa-miR-181a-5p;hsa-miR-6511b-5p;hsa-miR-22-5p;NC_000011.10_24785;hsa-miR-4443
CDCA7	83879	hsa_circ_0059354	0.333333	1.40413e-21	13	hsa-miR-30d-5p;NC_000024.10_38844;hsa-miR-6842-3p;hsa-miR-181c-5p;hsa-miR-449c-5p;hsa-miR-3929;hsa-miR-98-5p;NC_000017.11_32431;hsa-miR-181a-5p;hsa-miR-6511b-5p;hsa-miR-22-5p;hsa-miR-215-3p;NC_000011.10_24785
KLHL5	51088	hsa_circ_0076332	0.513514	1.51461e-21	17	hsa-miR-302a-5p;hsa-miR-520c-3p;NC_000008.11_20037*;NC_000018.10_33742;hsa-miR-573;hsa-miR-20a-5p;hsa-miR-512-3p;hsa-miR-302b-5p;hsa-miR-3143;NC_000003.12_8583;NC_000003.12_7973;hsa-miR-15b-3p;hsa-miR-5585-3p;hsa-miR-372-5p;hsa-miR-17-5p;hsa-miR-3662;NC_000006.12_15769
ROR1	4919	hsa_circ_0012566	0.56	1.54818e-21	13	hsa-miR-30d-5p;hsa-miR-21-5p;hsa-miR-499a-5p;NC_000003.12_9115;hsa-miR-181c-5p;hsa-miR-22-3p;hsa-miR-9-5p;hsa-miR-664a-5p;hsa-miR-203a-3p;hsa-miR-181a-5p;hsa-miR-22-5p;NC_000010.11_22861;NC_000008.11_18787
KCNJ2	3759	hsa_circ_0012566	0.56	1.54818e-21	13	hsa-miR-193a-5p;NW_003315954.1_39634;hsa-miR-24-3p;hsa-miR-181c-5p;hsa-miR-9-5p;hsa-miR-449c-5p;hsa-miR-22-3p;hsa-miR-203a-3p;hsa-miR-181a-5p;hsa-miR-22-5p;NC_000016.10_31515;NC_000008.11_18787;hsa-miR-6511b-5p
KIFC1	3833	hsa_circ_0008221	0.0504808	1.64494e-21	14	hsa-miR-328-3p;NC_000014.9_29046;hsa-miR-659-5p;hsa-miR-369-3p;hsa-miR-3929;hsa-miR-664a-5p;NC_000019.10_34428;hsa-miR-203a-3p;hsa-miR-6511b-5p;hsa-miR-22-5p;NC_000011.10_23882;NC_000011.10_24785;hsa-miR-4443;NC_000009.12_21531
DHRS2	10202	hsa_circ_0052203	0.333333	1.79129e-21	12	NC_000014.9_29046;NC_000024.10_38844;hsa-miR-6842-3p;NC_000002.12_3880;hsa-miR-98-5p;hsa-miR-3929;NC_000017.11_32431;NC_000017.11_32431*;hsa-miR-6511b-5p;hsa-miR-22-5p;NC_000011.10_24785;NC_000009.12_21531
IFIT3	3437	hsa_circ_0052203	0.333333	1.79129e-21	12	NC_000024.10_38844;hsa-miR-26b-5p;hsa-miR-449c-5p;hsa-miR-98-5p;hsa-miR-3929;hsa-miR-6511b-5p;hsa-miR-22-5p;NC_000011.10_24785;NC_000010.11_22289;NC_000010.11_22861;NC_000020.11_34751;NC_000009.12_21531
SKA3	221150	hsa_circ_0052203	0.416667	1.79129e-21	12	NC_000024.10_38844;hsa-miR-6842-3p;hsa-miR-22-3p;NC_000002.12_3880;hsa-miR-3929;hsa-miR-4435;NC_000017.11_32431;hsa-miR-22-5p;NC_000010.11_22289;NC_000010.11_22861;hsa-miR-4443;NC_000009.12_21531
PSD3	23362	hsa_circ_0038178	0.642857	1.82369e-21	13	hsa-miR-27a-3p;hsa-miR-6842-3p;hsa-miR-181c-5p;hsa-miR-9-5p;NC_000002.12_3880;hsa-miR-3929;hsa-miR-4435;hsa-miR-664a-5p;NC_000017.11_32431;hsa-miR-181a-5p;hsa-miR-6511b-5p;hsa-miR-22-5p;hsa-miR-4443
KLK7	5650	hsa_circ_0059354	0.266667	1.86839e-21	11	hsa-miR-193a-5p;NC_000002.12_3880;hsa-miR-449c-5p;hsa-miR-3929;hsa-miR-22-3p;hsa-miR-148a-3p;hsa-miR-181a-5p;hsa-miR-6511b-5p;hsa-miR-22-5p;NC_000011.10_24785;hsa-miR-4443
ZNF519	162655	hsa_circ_0086848	0.326531	2.01269e-21	13	hsa-miR-24-3p;hsa-miR-659-5p;hsa-miR-369-3p;hsa-miR-9-5p;hsa-miR-22-3p;hsa-miR-3929;hsa-miR-4435;hsa-miR-98-5p;NC_000017.11_32431;hsa-miR-203a-3p;hsa-miR-6511b-5p;hsa-miR-22-5p;hsa-miR-4443
INPP5D	3635	hsa_circ_0086848	0.408163	2.01269e-21	13	hsa-miR-328-3p;hsa-miR-193a-5p;hsa-miR-659-5p;hsa-miR-6842-3p;hsa-miR-9-5p;hsa-miR-22-3p;hsa-miR-449c-5p;hsa-miR-4435;NC_000017.11_32431;hsa-miR-6511b-5p;hsa-miR-22-5p;NC_000010.11_22861;hsa-miR-183-5p
KCNAB2	8514	hsa_circ_0086848	0.428571	2.01269e-21	13	hsa-miR-328-3p;hsa-miR-193a-5p;hsa-miR-24-3p;hsa-miR-6842-3p;hsa-miR-9-5p;hsa-miR-22-3p;hsa-miR-449c-5p;hsa-miR-3929;hsa-miR-4435;NC_000017.11_32431;NC_000019.10_34428;hsa-miR-6511b-5p;hsa-miR-4443
RGS3	5998	hsa_circ_0014557	0.789474	2.08539e-21	13	hsa-miR-30d-5p;hsa-miR-27a-3p;hsa-miR-6842-3p;hsa-miR-9-5p;NC_000002.12_3880;hsa-miR-98-5p;NC_000017.11_32431;NC_000017.11_32431*;hsa-miR-181a-5p;hsa-miR-22-5p;hsa-miR-215-3p;hsa-miR-6511b-5p;NC_000011.10_23882
BTN3A1	11119	hsa_circ_0086848	0.306122	2.08759e-21	12	hsa-miR-24-3p;hsa-miR-6842-3p;hsa-miR-22-3p;hsa-miR-449c-5p;hsa-miR-98-5p;hsa-miR-3929;NC_000017.11_32431;NC_000019.10_34428;hsa-miR-203a-3p;hsa-miR-6511b-5p;hsa-miR-22-5p;NC_000010.11_22861
CDH17	1015	hsa_circ_0086848	0.244898	2.08759e-21	12	hsa-miR-193a-5p;hsa-miR-24-3p;hsa-miR-183-5p;hsa-miR-9-5p;hsa-miR-3929;hsa-miR-4435;NC_000017.11_32431;NC_000019.10_34428;hsa-miR-203a-3p;hsa-miR-22-5p;NC_000011.10_23882;hsa-miR-4443
WDR76	79968	hsa_circ_0086848	0.285714	2.08759e-21	12	hsa-miR-183-5p;NC_000005.10_13790;hsa-miR-449c-5p;hsa-miR-98-5p;hsa-miR-3929;hsa-miR-4435;NC_000019.10_34428;hsa-miR-6511b-5p;hsa-miR-22-5p;NC_000011.10_23882;NC_000010.11_22861;hsa-miR-4443
KIF21B	23046	hsa_circ_0076332	0.486486	2.11657e-21	17	NC_000013.11_27627;hsa-miR-3662;hsa-miR-520c-3p;hsa-miR-20a-5p;hsa-miR-573;NC_000010.11_23303;hsa-miR-512-3p;NC_000006.12_15769;hsa-miR-3143;NC_000003.12_8583;hsa-miR-18a-3p;hsa-miR-5585-3p;hsa-miR-1323;hsa-miR-372-5p;hsa-miR-17-5p;NC_000007.14_17821;hsa-miR-34c-5p
HIPK3	10114	hsa_circ_0076332	0.513514	2.11657e-21	17	hsa-miR-522-3p;NC_000013.11_27627;NC_000008.11_19445;hsa-miR-520c-3p;hsa-miR-20a-5p;hsa-miR-573;hsa-miR-373-5p;NC_000012.12_26286;hsa-miR-3143;NC_000003.12_7973;hsa-miR-15b-3p;NC_000006.12_15769;hsa-miR-1323;hsa-miR-372-5p;hsa-miR-17-5p;hsa-miR-34c-5p;hsa-miR-18a-3p
PTP4A1	7803	hsa_circ_0086848	0.244898	2.12075e-21	11	hsa-miR-328-3p;hsa-miR-24-3p;NC_000005.10_13790;hsa-miR-449c-5p;hsa-miR-98-5p;NC_000017.11_32431;hsa-miR-203a-3p;hsa-miR-6511b-5p;hsa-miR-22-5p;NC_000011.10_23882;hsa-miR-183-5p
ID3	3399	hsa_circ_0086848	0.244898	2.12075e-21	11	hsa-miR-328-3p;hsa-miR-24-3p;hsa-miR-6842-3p;hsa-miR-22-3p;hsa-miR-449c-5p;hsa-miR-4435;hsa-miR-148a-3p;NC_000017.11_32431;NC_000019.10_34428;hsa-miR-6511b-5p;hsa-miR-22-5p
TDP1	55775	hsa_circ_0030467	0.382979	2.17339e-21	12	hsa-miR-499a-5p;hsa-miR-21-5p;hsa-miR-181c-5p;NC_000002.12_3880;hsa-miR-22-3p;NC_000011.10_23807;hsa-miR-4435;hsa-miR-203a-3p;hsa-miR-22-5p;hsa-miR-6761-5p;hsa-miR-3189-3p;NC_000009.12_21531
ESPL1	9700	hsa_circ_0006957	0.0816327	2.24168e-21	14	hsa-miR-193a-5p;hsa-miR-21-5p;hsa-miR-27a-3p;hsa-miR-24-3p;hsa-miR-659-5p;hsa-miR-22-3p;hsa-miR-449c-5p;hsa-miR-3929;hsa-miR-9-5p;hsa-miR-664a-5p;hsa-miR-22-5p;NC_000010.11_22861;NC_000011.10_24785;NC_000020.11_34751
FANCA	2175	hsa_circ_0012566	0.64	2.32637e-21	14	hsa-miR-30d-5p;hsa-miR-193a-5p;NC_000003.12_9115;hsa-miR-24-3p;hsa-miR-181c-5p;hsa-miR-9-5p;hsa-miR-449c-5p;hsa-miR-22-3p;hsa-miR-664a-5p;hsa-miR-203a-3p;hsa-miR-181a-5p;hsa-miR-6511b-5p;hsa-miR-22-5p;NC_000009.12_21531
FANCC	2176	hsa_circ_0052203	0.444444	2.41842e-21	13	NC_000014.9_29046;NC_000024.10_38844;hsa-miR-6842-3p;hsa-miR-22-3p;hsa-miR-449c-5p;NC_000002.12_3880;hsa-miR-148a-3p;NC_000017.11_32431;NC_000017.11_32431*;NC_000010.11_22861;NC_000011.10_24785;NC_000020.11_34751;hsa-miR-4443
ISL1	3670	hsa_circ_0052203	0.388889	2.41842e-21	13	NC_000024.10_38844;hsa-miR-6842-3p;hsa-miR-22-3p;NC_000002.12_3880;hsa-miR-3929;hsa-miR-98-5p;NC_000017.11_32431;NC_000017.11_32431*;hsa-miR-6511b-5p;hsa-miR-642a-5p;NC_000010.11_22861;NC_000011.10_24785;NC_000010.11_22289
DDX51	317781	hsa_circ_0052203	0.527778	2.41842e-21	13	NC_000014.9_29046;hsa-miR-6842-3p;hsa-miR-22-3p;hsa-miR-3929;hsa-miR-4435;hsa-miR-148a-3p;NC_000017.11_32431;NC_000017.11_32431*;hsa-miR-6511b-5p;hsa-miR-22-5p;NC_000011.10_24785;NC_000020.11_34751;hsa-miR-4443
KANK2	25959	hsa_circ_0052203	0.472222	2.41842e-21	13	hsa-miR-6842-3p;hsa-miR-22-3p;hsa-miR-3929;hsa-miR-4435;NC_000017.11_32431;NC_000017.11_32431*;hsa-miR-6511b-5p;hsa-miR-642a-5p;hsa-miR-22-5p;NC_000011.10_24785;NC_000020.11_34751;hsa-miR-4443;NC_000009.12_21531
POLQ	10721	hsa_circ_0052203	0.361111	2.41842e-21	13	NC_000014.9_29046;hsa-miR-6842-3p;hsa-miR-181c-5p;hsa-miR-22-3p;NC_000002.12_3880;hsa-miR-98-5p;hsa-miR-4435;NC_000017.11_32431;NC_000017.11_32431*;hsa-miR-6511b-5p;hsa-miR-22-5p;NC_000020.11_34751;NC_000009.12_21531
HIRIP3	8479	hsa_circ_0008221	0.0456731	2.52011e-21	13	hsa-miR-328-3p;hsa-miR-21-5p;NC_000003.12_9115;NC_000016.10_31515;hsa-miR-6842-3p;hsa-miR-22-3p;NC_000002.12_3880;hsa-miR-3929;hsa-miR-449c-5p;NC_000017.11_32431;hsa-miR-22-5p;NC_000011.10_24785;hsa-miR-4443
NT5DC2	64943	hsa_circ_0008221	0.0432692	2.52011e-21	13	hsa-miR-193a-5p;NC_000014.9_29046;hsa-miR-24-3p;NC_000002.12_3880;hsa-miR-449c-5p;hsa-miR-3929;hsa-miR-9-5p;hsa-miR-6511b-5p;NC_000016.10_31515;NC_000011.10_24785;NC_000020.11_34751;hsa-miR-4443;NC_000009.12_21531
ZRANB3	84083	hsa_circ_0012566	0.56	2.65761e-21	13	hsa-miR-30d-5p;hsa-miR-499a-5p;hsa-miR-193a-5p;NC_000003.12_9115;hsa-miR-9-5p;hsa-miR-449c-5p;NC_000016.10_31213;hsa-miR-664a-5p;hsa-miR-6511b-5p;NC_000010.11_22861;NC_000008.11_18787;NC_000011.10_23882;NC_000009.12_21531
ICMT	23463	hsa_circ_0012566	0.56	2.65761e-21	13	hsa-miR-30d-5p;hsa-miR-193a-5p;NC_000003.12_9115;hsa-miR-181c-5p;hsa-miR-9-5p;hsa-miR-22-3p;hsa-miR-664a-5p;hsa-miR-203a-3p;hsa-miR-181a-5p;hsa-miR-22-5p;NC_000010.11_22861;NC_000008.11_18787;hsa-miR-6511b-5p
MAGED1	9500	hsa_circ_0006957	0.0544218	2.6962e-21	13	hsa-miR-193a-5p;hsa-miR-27a-3p;NC_000016.10_31515;hsa-miR-659-5p;hsa-miR-6807-5p;hsa-miR-9-5p;hsa-miR-449c-5p;hsa-miR-3929;NC_000001.11_1021;hsa-miR-5701;hsa-miR-22-5p;NC_000010.11_22861;NC_000011.10_24785
SOCS3	9021	hsa_circ_0006957	0.0578231	2.6962e-21	13	hsa-miR-30d-5p;hsa-miR-193a-5p;NC_000014.9_29046;NC_000003.12_9115;hsa-miR-24-3p;hsa-miR-6807-5p;hsa-miR-22-3p;hsa-miR-3929;NC_000019.10_34428;hsa-miR-22-5p;NC_000011.10_24785;NC_000010.11_22861;NC_000020.11_34751
TGFBR2	7048	hsa_circ_0006957	0.0986395	2.6962e-21	13	hsa-miR-30d-5p;hsa-miR-21-5p;hsa-miR-155-5p;hsa-miR-27a-3p;NC_000003.12_9115;hsa-miR-659-5p;hsa-miR-22-3p;hsa-miR-449c-5p;NC_000016.10_31213;hsa-miR-3929;hsa-miR-9-5p;NC_000012.12_26540;hsa-miR-22-5p
SLCO2A1	6578	hsa_circ_0006957	0.0782313	2.6962e-21	13	hsa-miR-193a-5p;NC_000014.9_29046;hsa-miR-24-3p;hsa-miR-659-5p;hsa-miR-6807-5p;NC_000001.11_1021;hsa-miR-449c-5p;hsa-miR-3929;hsa-miR-22-3p;hsa-miR-664a-5p;hsa-miR-22-5p;NC_000011.10_24785;NC_000020.11_34751
CFTR	1080	hsa_circ_0059354	0.377778	2.6962e-21	13	hsa-miR-193a-5p;hsa-miR-27a-3p;NC_000024.10_38844;hsa-miR-6842-3p;hsa-miR-9-5p;hsa-miR-22-3p;hsa-miR-3929;NC_000002.12_3880;hsa-miR-98-5p;NC_000017.11_32431;hsa-miR-22-5p;NC_000010.11_22861;hsa-miR-215-3p
MYT1L	23040	hsa_circ_0063772	0.75	2.7121e-21	12	hsa-miR-30d-5p;NC_000003.12_9115;hsa-miR-27a-3p;hsa-miR-24-3p;NC_000002.12_3880;hsa-miR-449c-5p;hsa-miR-3929;hsa-miR-664a-5p;NC_000012.12_26540;hsa-miR-6511b-5p;hsa-miR-22-5p;NC_000020.11_34751
OCLN	100506658	hsa_circ_0059713	0.439024	2.82016e-21	17	NC_000006.12_16700;hsa-miR-3662;hsa-miR-20a-5p;hsa-miR-573;NC_000011.10_25384;NC_000003.12_9133;NC_000010.11_23646;NC_000022.11_36437;hsa-miR-373-5p;hsa-miR-7-5p;hsa-miR-582-5p;NC_000008.11_20037;hsa-miR-1323;NC_000016.10_31157;hsa-miR-205-5p;hsa-miR-3529-3p;hsa-miR-34c-5p
ZNF704	619279	hsa_circ_0045194	0.842105	2.89327e-21	15	NC_000012.12_25887;NC_000020.11_35116;hsa-miR-26a-1-3p;NC_000003.12_9133;NC_000022.11_36437;hsa-miR-510-5p;hsa-miR-302b-5p;hsa-miR-7-5p;hsa-miR-92a-1-5p;hsa-miR-3143;hsa-miR-526b-5p;hsa-miR-205-5p;NC_000007.14_17821;hsa-miR-3662;NC_000006.12_15769
PRKG2	5593	hsa_circ_0076332	0.486486	2.93793e-21	17	NC_000013.11_27627;hsa-miR-302a-5p;hsa-miR-3662;NC_000003.12_7520;hsa-miR-20a-5p;hsa-miR-373-5p;hsa-miR-302b-5p;hsa-miR-3143;hsa-miR-27b-5p;NC_000003.12_8583;NC_000003.12_7973;hsa-miR-15b-3p;hsa-miR-5585-3p;NC_000007.14_17821;hsa-miR-372-5p;hsa-miR-34c-5p;NC_000006.12_15769
NUDT21	11051	hsa_circ_0038178	0.5	2.96974e-21	12	hsa-miR-27a-3p;hsa-miR-181c-5p;NC_000002.12_3880;hsa-miR-9-5p;hsa-miR-664a-5p;hsa-miR-4435;NC_000012.12_26540;hsa-miR-181a-5p;hsa-miR-642a-5p;hsa-miR-22-5p;hsa-miR-6511b-5p;hsa-miR-4443
DDX51	317781	hsa_circ_0038178	0.5	2.96974e-21	12	hsa-miR-27a-3p;hsa-miR-24-3p;hsa-miR-6842-3p;hsa-miR-3929;hsa-miR-664a-5p;hsa-miR-4435;NC_000012.12_26540;NC_000017.11_32431;hsa-miR-181a-5p;hsa-miR-6511b-5p;hsa-miR-22-5p;hsa-miR-4443
POLQ	10721	hsa_circ_0038178	0.535714	2.96974e-21	12	hsa-miR-27a-3p;hsa-miR-24-3p;hsa-miR-6842-3p;hsa-miR-181c-5p;NC_000002.12_3880;hsa-miR-9-5p;hsa-miR-4435;hsa-miR-664a-5p;NC_000017.11_32431;hsa-miR-181a-5p;hsa-miR-6511b-5p;hsa-miR-22-5p
KANK2	25959	hsa_circ_0038178	0.464286	2.96974e-21	12	hsa-miR-24-3p;hsa-miR-6842-3p;hsa-miR-9-5p;hsa-miR-3929;hsa-miR-664a-5p;hsa-miR-4435;NC_000012.12_26540;NC_000017.11_32431;hsa-miR-6511b-5p;hsa-miR-642a-5p;hsa-miR-22-5p;hsa-miR-4443
F2RL1	2150	hsa_circ_0059713	0.439024	3.04933e-21	16	NC_000023.11_36905;hsa-miR-3662;hsa-miR-7974;hsa-miR-573;hsa-miR-20a-5p;NC_000011.10_25384;NC_000010.11_23646;hsa-miR-548i;NC_000008.11_20037;NC_000005.10_11919>NC_000005.10_11920;hsa-miR-1323;hsa-miR-372-5p;hsa-miR-7-5p;NC_000018.10_33037;hsa-miR-3529-3p;hsa-miR-34c-5p
KCTD13	253980	hsa_circ_0059713	0.390244	3.04933e-21	16	hsa-miR-92a-3p;hsa-miR-3662;hsa-miR-20a-5p;hsa-miR-573;NC_000010.11_23646;hsa-miR-373-5p;hsa-miR-548i;hsa-miR-7-5p;NC_000003.12_7276;NC_000009.12_21925;hsa-miR-1323;hsa-miR-372-5p;NC_000006.12_15769;NC_000022.11_36437;hsa-miR-3529-3p;hsa-miR-34c-5p
GLI2	2736	hsa_circ_0059713	0.390244	3.05247e-21	14	NC_000023.11_36905;NC_000009.12_21957;NC_000021.9_35751;hsa-miR-7974;hsa-miR-573;hsa-miR-526b-5p;NC_000003.12_9133;NC_000016.10_31157;NC_000010.11_23646;hsa-miR-371a-5p;NC_000002.12_3238;NC_000005.10_11919>NC_000005.10_11920;hsa-miR-3529-3p;hsa-miR-34c-5p
KLHL5	51088	hsa_circ_0053716	0.436364	3.18229e-21	17	hsa-miR-520a-3p;NC_000002.12_3238;NC_000021.9_35751;hsa-let-7c-5p;hsa-miR-302c-5p;NC_000003.12_9133;NC_000001.11_3101;NC_000010.11_23646;hsa-miR-512-3p;hsa-miR-548i;NC_000018.10_33504*;hsa-miR-302b-5p;hsa-miR-15b-3p;hsa-miR-5585-3p;hsa-miR-372-5p;hsa-miR-3529-3p;hsa-miR-3662
MSH2	4436	hsa_circ_0030467	0.489362	3.4104e-21	12	NC_000011.10_23807;NC_000002.12_3880;hsa-miR-9-5p;hsa-miR-3929;hsa-miR-664a-5p;hsa-miR-4435;hsa-miR-203a-3p;NC_000023.11_37419;hsa-miR-22-5p;hsa-miR-6761-5p;hsa-miR-3189-3p;NC_000009.12_21531
MSH2	4436	hsa_circ_0014557	0.631579	3.4104e-21	12	hsa-miR-27a-3p;hsa-miR-6842-3p;hsa-miR-9-5p;NC_000002.12_3880;hsa-miR-98-5p;NC_000017.11_32431;NC_000017.11_32431*;NC_000023.11_37419;hsa-miR-22-5p;hsa-miR-215-3p;hsa-miR-6511b-5p;hsa-miR-3189-3p
ASPM	259266	hsa_circ_0030467	0.425532	3.4104e-21	12	hsa-miR-499a-5p;hsa-miR-21-5p;hsa-miR-181c-5p;NC_000002.12_3880;hsa-miR-22-3p;NC_000011.10_23807;hsa-miR-3929;hsa-miR-9-5p;hsa-miR-203a-3p;hsa-miR-22-5p;hsa-miR-6761-5p;NC_000009.12_21531
DHRS2	10202	hsa_circ_0059354	0.333333	3.43488e-21	12	NC_000014.9_29046;NC_000024.10_38844;hsa-miR-24-3p;hsa-miR-6842-3p;NC_000002.12_3880;hsa-miR-9-5p;hsa-miR-3929;hsa-miR-98-5p;NC_000017.11_32431;hsa-miR-6511b-5p;hsa-miR-22-5p;NC_000011.10_24785
MYBL2	4605	hsa_circ_0059354	0.333333	3.43488e-21	12	hsa-miR-193a-5p;NC_000014.9_29046;hsa-miR-30d-5p;NC_000024.10_38844;hsa-miR-24-3p;hsa-miR-6842-3p;hsa-miR-22-3p;hsa-miR-9-5p;NC_000016.10_31213;hsa-miR-22-5p;NC_000011.10_24785;hsa-miR-4443
RBBP8NL	140893	hsa_circ_0059354	0.355556	3.43488e-21	12	hsa-miR-193a-5p;NC_000014.9_29046;hsa-miR-6842-3p;hsa-miR-22-3p;hsa-miR-449c-5p;hsa-miR-3929;hsa-miR-9-5p;hsa-miR-148a-3p;hsa-miR-6511b-5p;hsa-miR-22-5p;NC_000011.10_24785;hsa-miR-4443
NCEH1	57552	hsa_circ_0076332	0.459459	3.53584e-21	15	NC_000008.11_19445;hsa-miR-34c-5p;hsa-miR-3662;NC_000003.12_7520;NC_000008.11_20037*;hsa-miR-573;hsa-miR-20a-5p;hsa-miR-373-5p;hsa-miR-27b-5p;hsa-miR-15b-3p;hsa-miR-302b-5p;hsa-miR-372-5p;hsa-miR-17-5p;NC_000007.14_17821;hsa-miR-522-3p
PARP9	83666	hsa_circ_0086848	0.428571	3.53893e-21	13	hsa-miR-328-3p;hsa-miR-659-5p;hsa-miR-6842-3p;hsa-miR-449c-5p;hsa-miR-3929;hsa-miR-98-5p;NC_000017.11_32431;NC_000019.10_34428;hsa-miR-203a-3p;hsa-miR-6511b-5p;hsa-miR-22-5p;NC_000011.10_23882;hsa-miR-4443
ROR1	4919	hsa_circ_0086848	0.408163	3.53893e-21	13	hsa-miR-328-3p;hsa-miR-659-5p;hsa-miR-6842-3p;hsa-miR-369-3p;hsa-miR-9-5p;hsa-miR-22-3p;hsa-miR-3929;hsa-miR-4435;hsa-miR-98-5p;hsa-miR-203a-3p;hsa-miR-22-5p;NC_000010.11_22861;hsa-miR-4443
SLC1A2	6506	hsa_circ_0050017	0.75	3.59516e-21	10	hsa-miR-155-5p;hsa-miR-27a-3p;hsa-miR-24-3p;hsa-miR-9-5p;hsa-miR-449c-5p;NC_000016.10_31213;hsa-miR-3929;NC_000017.11_32431;hsa-miR-22-5p;NC_000011.10_24785
RGS3	5998	hsa_circ_0030662	0.933333	3.65105e-21	12	hsa-miR-193a-5p;NC_000003.12_9115;hsa-miR-9-5p;hsa-miR-22-3p;hsa-miR-3929;hsa-miR-4435;NC_000017.11_32431;NC_000017.11_32431*;hsa-miR-22-5p;NC_000008.11_18787;NC_000001.11_2749*;NC_000009.12_21531
CHAF1A	10036	hsa_circ_0008221	0.0673077	3.70721e-21	14	hsa-miR-328-3p;hsa-miR-193a-5p;NC_000014.9_29046;hsa-miR-659-5p;hsa-miR-6842-3p;hsa-miR-9-5p;hsa-miR-449c-5p;hsa-miR-3929;hsa-miR-664a-5p;hsa-miR-22-5p;NC_000011.10_24785;NC_000010.11_22861;hsa-miR-4443;NC_000009.12_21531
MAGED1	9500	hsa_circ_0008221	0.0384615	3.70721e-21	14	hsa-miR-193a-5p;hsa-miR-27a-3p;NC_000016.10_31515;hsa-miR-659-5p;hsa-miR-181c-5p;hsa-miR-9-5p;hsa-miR-449c-5p;hsa-miR-3929;hsa-miR-98-5p;hsa-miR-181a-5p;hsa-miR-22-5p;NC_000010.11_22861;NC_000011.10_24785;hsa-miR-4443
LOXL3	84695	hsa_circ_0008221	0.0600962	3.70721e-21	14	hsa-miR-328-3p;hsa-miR-193a-5p;NC_000014.9_29046;hsa-miR-155-5p;hsa-miR-6842-3p;hsa-miR-181c-5p;hsa-miR-449c-5p;hsa-miR-98-5p;hsa-miR-664a-5p;hsa-miR-181a-5p;hsa-miR-6511b-5p;NC_000011.10_23882;NC_000011.10_24785;NC_000009.12_21531
GINS3	64785	hsa_circ_0052203	0.333333	3.90965e-21	11	NC_000014.9_29046;hsa-miR-26b-5p;hsa-miR-6807-5p;hsa-miR-3929;NC_000017.11_32431*;hsa-miR-6511b-5p;hsa-miR-642a-5p;hsa-miR-22-5p;NC_000011.10_24785;NC_000020.11_34751;NC_000009.12_21531
COL28A1	340267	hsa_circ_0038178	0.5	3.94177e-21	13	hsa-miR-27a-3p;hsa-miR-24-3p;hsa-miR-181c-5p;NC_000002.12_3880;hsa-miR-9-5p;hsa-miR-3929;hsa-miR-4435;hsa-miR-664a-5p;hsa-miR-181a-5p;hsa-miR-642a-5p;hsa-miR-22-5p;hsa-miR-6511b-5p;hsa-miR-4443
ASPH	444	hsa_circ_0076332	0.486486	4.05177e-21	17	NC_000013.11_27627;NC_000008.11_19445;hsa-miR-3662;hsa-miR-520c-3p;NC_000003.12_7520;NC_000018.10_33742;hsa-miR-573;hsa-miR-20a-5p;hsa-miR-512-3p;hsa-miR-373-5p;hsa-miR-3143;NC_000003.12_8583;hsa-miR-15b-3p;NC_000006.12_15769;hsa-miR-372-5p;hsa-miR-17-5p;hsa-miR-34c-5p
CHAC1	79094	hsa_circ_0059713	0.439024	4.12411e-21	17	NC_000006.12_16700;hsa-miR-302a-5p;hsa-miR-3662;NC_000021.9_35751;hsa-miR-7974;hsa-miR-573;hsa-miR-526b-5p;NC_000009.12_21957;NC_000001.11_2997;hsa-miR-20a-5p;NC_000003.12_7276;NC_000009.12_21925;NC_000002.12_3238;NC_000022.11_36437;NC_000005.10_11919>NC_000005.10_11920;hsa-miR-34c-5p;NC_000006.12_15769
LIPH	200879	hsa_circ_0059713	0.463415	4.12411e-21	17	hsa-miR-92a-3p;hsa-miR-302a-5p;NC_000021.9_35751;NC_000016.10_31157;NC_000003.12_9133;NC_000001.11_2997;hsa-miR-548i;hsa-miR-7-5p;NC_000003.12_7276;hsa-miR-371a-5p;hsa-miR-1323;hsa-miR-372-5p;NC_000002.12_3238;hsa-miR-205-5p;hsa-miR-3529-3p;hsa-miR-3662;NC_000006.12_15769
IGFBP4	3487	hsa_circ_0052203	0.388889	4.16166e-21	12	NC_000014.9_29046;hsa-miR-6842-3p;hsa-miR-6807-5p;hsa-miR-22-3p;hsa-miR-449c-5p;hsa-miR-3929;NC_000017.11_32431;NC_000017.11_32431*;hsa-miR-6511b-5p;NC_000010.11_22861;NC_000011.10_24785;NC_000009.12_21531
SUSD4	55061	hsa_circ_0052203	0.388889	4.16166e-21	12	NC_000014.9_29046;hsa-miR-22-3p;hsa-miR-98-5p;hsa-miR-3929;hsa-miR-4435;NC_000017.11_32431;NC_000017.11_32431*;hsa-miR-642a-5p;hsa-miR-22-5p;NC_000011.10_24785;NC_000010.11_22289;NC_000010.11_22861
FOXH1	8928	hsa_circ_0052203	0.388889	4.16166e-21	12	hsa-miR-6842-3p;NC_000002.12_3880;hsa-miR-22-3p;hsa-miR-3929;hsa-miR-4435;hsa-miR-449c-5p;NC_000017.11_32431;NC_000017.11_32431*;hsa-miR-642a-5p;NC_000011.10_24785;NC_000010.11_22289;NC_000020.11_34751
KIF22	3835	hsa_circ_0052203	0.361111	4.16166e-21	12	NC_000024.10_38844;hsa-miR-6842-3p;hsa-miR-6807-5p;hsa-miR-181c-5p;hsa-miR-22-3p;hsa-miR-449c-5p;hsa-miR-3929;hsa-miR-148a-3p;NC_000017.11_32431*;hsa-miR-6511b-5p;hsa-miR-642a-5p;hsa-miR-22-5p
FGA	2243	hsa_circ_0052203	0.361111	4.3659e-21	13	NC_000014.9_29046;NC_000024.10_38844;hsa-miR-181c-5p;hsa-miR-22-3p;hsa-miR-449c-5p;NC_000002.12_3880;hsa-miR-98-5p;NC_000017.11_32431*;hsa-miR-6511b-5p;hsa-miR-642a-5p;hsa-miR-22-5p;NC_000011.10_24785;NC_000020.11_34751
GAS2L3	283431	hsa_circ_0052203	0.444444	4.3659e-21	13	NC_000024.10_38844;hsa-miR-6807-5p;hsa-miR-181c-5p;NC_000002.12_3880;hsa-miR-449c-5p;hsa-miR-3929;hsa-miR-98-5p;NC_000017.11_32431*;hsa-miR-6511b-5p;hsa-miR-22-5p;NC_000010.11_22861;NC_000020.11_34751;NC_000009.12_21531
TRANK1	9881	hsa_circ_0052203	0.472222	4.3659e-21	13	hsa-miR-6842-3p;hsa-miR-181c-5p;hsa-miR-22-3p;NC_000002.12_3880;hsa-miR-3929;hsa-miR-4435;hsa-miR-98-5p;NC_000017.11_32431;hsa-miR-6511b-5p;hsa-miR-22-5p;NC_000010.11_22861;hsa-miR-4443;NC_000009.12_21531
TTN	7273	hsa_circ_0045194	0.842105	4.38571e-21	15	NC_000012.12_25887;NC_000020.11_35116;hsa-miR-3155a;hsa-miR-26a-1-3p;NC_000022.11_36437;hsa-miR-302b-5p;NC_000005.10_14158;hsa-miR-7-5p;hsa-miR-3143;hsa-miR-92a-1-5p;hsa-miR-526b-5p;hsa-miR-205-5p;NC_000007.14_17821;hsa-miR-3662;NC_000006.12_15769
KIF21B	23046	hsa_circ_0053716	0.454545	4.44537e-21	17	NC_000007.14_17824;hsa-miR-520a-3p;NC_000002.12_3238;hsa-miR-3662;hsa-miR-3155a;NC_000021.9_35751;hsa-miR-7974;hsa-let-7c-5p;NC_000010.11_23303;hsa-miR-512-3p;hsa-miR-548i;hsa-miR-92a-1-5p;hsa-miR-510-5p;hsa-miR-5585-3p;hsa-miR-1323;hsa-miR-372-5p;NC_000007.14_17821
IGFBP5	3488	hsa_circ_0012566	0.56	4.46136e-21	13	hsa-miR-499a-5p;NW_003315954.1_39634;hsa-miR-24-3p;hsa-miR-22-3p;hsa-miR-449c-5p;hsa-miR-664a-5p;hsa-miR-203a-3p;hsa-miR-22-5p;hsa-miR-6511b-5p;NC_000010.11_22861;NC_000008.11_18787;NC_000011.10_23882;NC_000009.12_21531
ID3	3399	hsa_circ_0008221	0.03125	4.46576e-21	12	hsa-miR-328-3p;hsa-miR-30d-5p;hsa-miR-27a-3p;hsa-miR-24-3p;hsa-miR-6842-3p;hsa-miR-22-3p;hsa-miR-449c-5p;hsa-miR-664a-5p;NC_000017.11_32431;NC_000019.10_34428;hsa-miR-6511b-5p;hsa-miR-22-5p
DCK	1633	hsa_circ_0008221	0.0288462	4.46576e-21	12	hsa-miR-328-3p;NC_000014.9_29046;hsa-miR-155-5p;hsa-miR-27a-3p;hsa-miR-369-3p;hsa-miR-22-3p;hsa-miR-3929;hsa-miR-98-5p;NC_000019.10_34428;hsa-miR-203a-3p;NC_000011.10_23882;NC_000009.12_21531
MTMR2	8898	hsa_circ_0076332	0.486486	4.53675e-21	16	NC_000013.11_27627;hsa-miR-3662;NC_000018.10_33742;hsa-miR-20a-5p;hsa-miR-573;NC_000010.11_23303;NC_000008.11_20037;NC_000012.12_26286;hsa-miR-3143;NC_000003.12_7973;hsa-miR-15b-3p;hsa-miR-5585-3p;hsa-miR-1323;hsa-miR-372-5p;hsa-miR-34c-5p;NC_000006.12_15769
KNTC1	9735	hsa_circ_0012566	0.48	4.57454e-21	12	hsa-miR-30d-5p;hsa-miR-499a-5p;hsa-miR-193a-5p;NC_000003.12_9115;hsa-miR-24-3p;hsa-miR-9-5p;hsa-miR-22-3p;hsa-miR-664a-5p;hsa-miR-203a-3p;hsa-miR-6511b-5p;hsa-miR-22-5p;NC_000009.12_21531
SPAG5	10615	hsa_circ_0086848	0.367347	4.57454e-21	12	hsa-miR-193a-5p;hsa-miR-24-3p;hsa-miR-6842-3p;hsa-miR-369-3p;hsa-miR-9-5p;hsa-miR-449c-5p;hsa-miR-3929;hsa-miR-4435;hsa-miR-98-5p;hsa-miR-203a-3p;hsa-miR-22-5p;hsa-miR-4443
TMPO	7112	hsa_circ_0086848	0.387755	4.57454e-21	12	hsa-miR-328-3p;hsa-miR-193a-5p;hsa-miR-6842-3p;NC_000005.10_13790;hsa-miR-9-5p;hsa-miR-3929;hsa-miR-4435;hsa-miR-98-5p;hsa-miR-148a-3p;hsa-miR-6511b-5p;hsa-miR-22-5p;hsa-miR-183-5p
DTNB	1838	hsa_circ_0086848	0.408163	4.57454e-21	12	hsa-miR-328-3p;hsa-miR-24-3p;hsa-miR-6842-3p;NC_000005.10_13790;hsa-miR-9-5p;hsa-miR-22-3p;hsa-miR-3929;hsa-miR-98-5p;hsa-miR-148a-3p;hsa-miR-203a-3p;hsa-miR-6511b-5p;hsa-miR-183-5p
DHX58	79132	hsa_circ_0086848	0.306122	4.57454e-21	12	hsa-miR-328-3p;hsa-miR-193a-5p;hsa-miR-4443;hsa-miR-24-3p;hsa-miR-6842-3p;NC_000005.10_13790;hsa-miR-22-3p;hsa-miR-4435;hsa-miR-148a-3p;NC_000017.11_32431;hsa-miR-6511b-5p;hsa-miR-183-5p
CCNE2	9134	hsa_circ_0086848	0.244898	4.57454e-21	12	hsa-miR-4443;hsa-miR-24-3p;hsa-miR-659-5p;hsa-miR-6842-3p;hsa-miR-369-3p;hsa-miR-9-5p;hsa-miR-98-5p;hsa-miR-203a-3p;hsa-miR-22-5p;NC_000011.10_23882;NC_000010.11_22861;hsa-miR-183-5p
VSIG10L	147645	hsa_circ_0059713	0.463415	4.82228e-21	16	NC_000006.12_16700;NC_000023.11_36905;hsa-miR-3662;NC_000021.9_35751;hsa-miR-7974;hsa-miR-573;hsa-miR-373-5p;NC_000018.10_33504*;hsa-miR-582-5p;NC_000008.11_20037;NC_000009.12_21925;hsa-miR-1323;NC_000002.12_3238;hsa-miR-7-5p;hsa-miR-372-5p;hsa-miR-34c-5p
FRMD4B	23150	hsa_circ_0029966	0.8125	4.91365e-21	11	hsa-miR-30d-5p;hsa-miR-155-5p;NC_000003.12_9115;hsa-miR-27a-3p;NC_000016.10_31515;hsa-miR-9-5p;hsa-miR-22-3p;NC_000016.10_31213;hsa-miR-203a-3p;hsa-miR-22-5p;NC_000010.11_22861
SMC1A	8243	hsa_circ_0037864	1	5.0037e-21	11	hsa-miR-193a-5p;hsa-miR-27a-3p;NC_000005.10_13790;hsa-miR-9-5p;NC_000002.12_3880;hsa-miR-22-3p;hsa-miR-98-5p;NC_000017.11_32431;hsa-miR-203a-3p;NC_000020.11_34751;NC_000009.12_21531
MPP2	4355	hsa_circ_0059354	0.422222	5.01101e-21	13	hsa-miR-193a-5p;NC_000014.9_29046;hsa-miR-24-3p;hsa-miR-6842-3p;hsa-miR-9-5p;hsa-miR-449c-5p;hsa-miR-3929;hsa-miR-98-5p;hsa-miR-148a-3p;NC_000017.11_32431;hsa-miR-22-5p;NC_000011.10_24785;NC_000010.11_22861
DPYSL2	1808	hsa_circ_0059354	0.333333	5.01101e-21	13	hsa-miR-30d-5p;NC_000014.9_29046;hsa-miR-27a-3p;hsa-miR-24-3p;hsa-miR-181c-5p;hsa-miR-9-5p;NC_000002.12_3880;hsa-miR-4758-3p;NC_000017.11_32431;hsa-miR-181a-5p;hsa-miR-22-5p;NC_000011.10_24785;NC_000010.11_22861
JADE2	23338	hsa_circ_0038178	0.5	5.05507e-21	12	hsa-miR-27a-3p;hsa-miR-24-3p;hsa-miR-6842-3p;hsa-miR-181c-5p;NC_000002.12_3880;hsa-miR-9-5p;hsa-miR-3929;NC_000017.11_32431;hsa-miR-181a-5p;hsa-miR-6511b-5p;hsa-miR-22-5p;hsa-miR-4443
TONSL	4796	hsa_circ_0038178	0.464286	5.05507e-21	12	hsa-miR-27a-3p;hsa-miR-24-3p;hsa-miR-6842-3p;NC_000002.12_3880;hsa-miR-664a-5p;hsa-miR-4435;NC_000012.12_26540;NC_000017.11_32431;hsa-miR-6511b-5p;hsa-miR-642a-5p;hsa-miR-22-5p;hsa-miR-4443
CLSPN	63967	hsa_circ_0030467	0.510638	5.26301e-21	12	NC_000011.10_23807;hsa-miR-181c-5p;NC_000002.12_3880;hsa-miR-3929;hsa-miR-22-3p;hsa-miR-4435;hsa-miR-664a-5p;hsa-miR-9-5p;hsa-miR-203a-3p;hsa-miR-22-5p;hsa-miR-3189-3p;NC_000009.12_21531
CLSPN	63967	hsa_circ_0014557	0.789474	5.26301e-21	12	hsa-miR-27a-3p;hsa-miR-6842-3p;hsa-miR-9-5p;NC_000002.12_3880;hsa-miR-98-5p;NC_000017.11_32431;hsa-miR-181a-5p;hsa-miR-22-5p;hsa-miR-215-3p;hsa-miR-6511b-5p;NC_000011.10_23882;hsa-miR-3189-3p
TICRR	90381	hsa_circ_0014557	0.736842	5.26301e-21	12	hsa-miR-30d-5p;hsa-miR-27a-3p;hsa-miR-6842-3p;hsa-miR-9-5p;hsa-miR-98-5p;NC_000017.11_32431;NC_000017.11_32431*;hsa-miR-181a-5p;hsa-miR-22-5p;hsa-miR-215-3p;hsa-miR-6511b-5p;NC_000011.10_23882
TMEM106B	54664	hsa_circ_0076332	0.405405	5.71199e-21	15	NC_000013.11_27627;NC_000008.11_19445;hsa-miR-520c-3p;NC_000003.12_7520;NC_000018.10_33742;hsa-miR-573;NC_000008.11_20037;NC_000012.12_26286;hsa-miR-3143;NC_000003.12_7973;NC_000006.12_15769;NC_000007.14_17821;hsa-miR-372-5p;hsa-miR-34c-5p;hsa-miR-18a-3p
FIGN	55137	hsa_circ_0013529	0.923077	5.80256e-21	11	hsa-miR-30d-5p;NC_000003.12_9115;hsa-miR-27a-3p;hsa-miR-6842-3p;hsa-miR-369-3p;hsa-miR-22-3p;hsa-miR-9-5p;hsa-miR-3929;hsa-miR-664a-5p;hsa-miR-203a-3p;hsa-miR-181a-5p
NFIB	4781	hsa_circ_0013529	0.923077	5.80256e-21	11	hsa-miR-30d-5p;NC_000003.12_9115;hsa-miR-27a-3p;hsa-miR-6842-3p;hsa-miR-369-3p;hsa-miR-22-3p;hsa-miR-9-5p;hsa-miR-3929;hsa-miR-203a-3p;hsa-miR-181a-5p;NC_000010.11_22289
TIPARP	25976	hsa_circ_0059713	0.439024	5.97866e-21	17	hsa-miR-302a-5p;hsa-miR-3662;hsa-miR-20a-5p;hsa-miR-573;NC_000011.10_25384;NC_000010.11_23646;NC_000022.11_36437;hsa-miR-373-5p;hsa-miR-548i;hsa-miR-7-5p;NC_000008.11_20037;hsa-miR-371a-5p;NC_000009.12_21925;NC_000002.12_3238;hsa-miR-205-5p;hsa-miR-372-5p;NC_000005.10_11919>NC_000005.10_11920
ZRANB3	84083	hsa_circ_0086848	0.408163	6.07271e-21	13	hsa-miR-328-3p;hsa-miR-193a-5p;hsa-miR-6842-3p;hsa-miR-369-3p;hsa-miR-9-5p;hsa-miR-449c-5p;hsa-miR-98-5p;hsa-miR-4435;hsa-miR-148a-3p;hsa-miR-6511b-5p;NC_000010.11_22861;NC_000011.10_23882;hsa-miR-183-5p
PKP2	5318	hsa_circ_0038178	0.428571	6.10933e-21	11	hsa-miR-27a-3p;hsa-miR-24-3p;hsa-miR-6842-3p;hsa-miR-181c-5p;hsa-miR-9-5p;hsa-miR-4435;hsa-miR-664a-5p;NC_000017.11_32431;hsa-miR-181a-5p;hsa-miR-6511b-5p;hsa-miR-4443
ITPR1	3708	hsa_circ_0008261	0.777778	6.34582e-21	14	NC_000006.12_16700;NC_000019.10_34542;hsa-miR-7974;hsa-miR-514a-3p;NC_000010.11_23303;NC_000001.11_3101;hsa-miR-512-3p;hsa-miR-510-5p;NC_000007.14_18366;NC_000009.12_21925;NC_000005.10_13205;NC_000016.10_31157;hsa-miR-3529-3p;hsa-miR-34c-5p
MXI1	4601	hsa_circ_0076332	0.459459	6.63464e-21	16	hsa-miR-3662;hsa-miR-520c-3p;NC_000008.11_20037*;NC_000018.10_33742;hsa-miR-573;hsa-miR-20a-5p;NC_000010.11_23303;hsa-miR-512-3p;hsa-miR-373-5p;hsa-miR-3143;hsa-miR-27b-5p;NC_000003.12_7973;hsa-miR-372-5p;NC_000006.12_15769;hsa-miR-17-5p;hsa-miR-34c-5p
SLC16A4	9122	hsa_circ_0076332	0.459459	6.63464e-21	16	hsa-miR-302a-5p;hsa-miR-3662;NC_000003.12_7520;hsa-miR-520c-3p;hsa-miR-573;hsa-miR-20a-5p;NC_000010.11_23303;hsa-miR-512-3p;hsa-miR-373-5p;hsa-miR-3143;hsa-miR-27b-5p;NC_000003.12_7973;NC_000006.12_15769;NC_000007.14_17821;hsa-miR-17-5p;hsa-miR-34c-5p
PRDM1	639	hsa_circ_0076332	0.459459	6.63464e-21	16	NC_000008.11_19445;hsa-miR-3662;NC_000018.10_33742;NC_000003.12_7520;hsa-miR-20a-5p;hsa-miR-573;NC_000010.11_23303;hsa-miR-373-5p;hsa-miR-302b-5p;NC_000008.11_20037;NC_000003.12_8583;NC_000003.12_7973;hsa-miR-15b-3p;NC_000006.12_15769;hsa-miR-372-5p;hsa-miR-34c-5p
SEMA3C	10512	hsa_circ_0030467	0.297872	6.75741e-21	11	hsa-miR-499a-5p;hsa-miR-181c-5p;NC_000002.12_3880;NC_000011.10_23807;hsa-miR-3929;hsa-miR-4435;hsa-miR-664a-5p;hsa-miR-9-5p;hsa-miR-203a-3p;hsa-miR-22-5p;NC_000009.12_21531
FSCN1	6624	hsa_circ_0086848	0.244898	6.75741e-21	11	hsa-miR-24-3p;hsa-miR-6842-3p;hsa-miR-183-5p;NC_000005.10_13790;hsa-miR-22-3p;hsa-miR-9-5p;hsa-miR-3929;hsa-miR-148a-3p;NC_000017.11_32431;hsa-miR-6511b-5p;hsa-miR-4443
KIF7	374654	hsa_circ_0059354	0.311111	6.97153e-21	11	hsa-miR-193a-5p;NC_000014.9_29046;hsa-miR-24-3p;hsa-miR-6842-3p;hsa-miR-22-3p;hsa-miR-449c-5p;hsa-miR-3929;hsa-miR-98-5p;NC_000017.11_32431;hsa-miR-6511b-5p;NC_000011.10_24785
SLC40A1	30061	hsa_circ_0008221	0.0408654	7.13788e-21	13	hsa-miR-499a-5p;hsa-miR-27a-3p;hsa-miR-24-3p;NC_000002.12_3880;hsa-miR-9-5p;hsa-miR-3929;hsa-miR-203a-3p;NC_000004.12_10963;hsa-miR-22-5p;NC_000011.10_23882;NC_000010.11_22861;NC_000020.11_34751;NC_000009.12_21531
C1orf112	55732	hsa_circ_0008221	0.0649038	7.13788e-21	13	hsa-miR-30d-5p;hsa-miR-21-5p;NC_000003.12_9115;hsa-miR-27a-3p;hsa-miR-9-5p;hsa-miR-3929;hsa-miR-664a-5p;hsa-miR-98-5p;hsa-miR-203a-3p;hsa-miR-6511b-5p;NC_000004.12_10963;NC_000010.11_22861;NC_000009.12_21531
SLC2A1	6513	hsa_circ_0059713	0.390244	7.52468e-21	16	NC_000023.11_36905;hsa-miR-3662;NC_000021.9_35751;hsa-miR-7974;hsa-miR-573;hsa-miR-526b-5p;NC_000011.10_25384;NC_000018.10_33504*;hsa-miR-582-5p;NC_000003.12_7276;hsa-miR-1323;NC_000002.12_3238;hsa-miR-205-5p;NC_000005.10_11919>NC_000005.10_11920;hsa-miR-3529-3p;hsa-miR-34c-5p
AHNAK2	113146	hsa_circ_0076332	0.513514	7.56584e-21	17	NC_000013.11_27627;hsa-miR-302a-5p;hsa-miR-3662;NC_000003.12_7520;hsa-miR-573;NC_000010.11_23303;hsa-miR-512-3p;hsa-miR-373-5p;NC_000006.12_15769;hsa-miR-3143;hsa-miR-27b-5p;hsa-miR-15b-3p;hsa-miR-5585-3p;hsa-miR-1323;hsa-miR-372-5p;NC_000007.14_17821;hsa-miR-18a-3p
CCNF	899	hsa_circ_0086498	0.875	7.6107e-21	11	hsa-miR-30d-5p;NC_000003.12_9115;hsa-miR-27a-3p;hsa-miR-6807-5p;NC_000002.12_3880;hsa-miR-449c-5p;hsa-miR-98-5p;hsa-miR-664a-5p;hsa-miR-181a-5p;hsa-miR-22-5p;hsa-miR-183-5p
ZNF608	57507	hsa_circ_0052203	0.472222	7.67381e-21	13	hsa-miR-26b-5p;NC_000024.10_38844;hsa-miR-6842-3p;hsa-miR-181c-5p;NC_000002.12_3880;NC_000017.11_32431*;hsa-miR-642a-5p;hsa-miR-22-5p;NC_000011.10_24785;NC_000010.11_22861;NC_000020.11_34751;hsa-miR-4443;NC_000009.12_21531
FRMD4B	23150	hsa_circ_0052203	0.416667	7.67381e-21	13	hsa-miR-6842-3p;hsa-miR-22-3p;NC_000002.12_3880;hsa-miR-3929;hsa-miR-98-5p;NC_000017.11_32431;NC_000017.11_32431*;hsa-miR-6511b-5p;hsa-miR-22-5p;NC_000010.11_22861;NC_000020.11_34751;hsa-miR-4443;NC_000009.12_21531
CYP19A1	1588	hsa_circ_0059354	0.333333	7.97728e-21	12	hsa-miR-193a-5p;hsa-miR-30d-5p;hsa-miR-181c-5p;hsa-miR-22-3p;NC_000002.12_3880;hsa-miR-3929;hsa-miR-449c-5p;hsa-miR-98-5p;hsa-miR-181a-5p;hsa-miR-6511b-5p;hsa-miR-22-5p;hsa-miR-4443
TK1	7083	hsa_circ_0059354	0.266667	7.97728e-21	12	hsa-miR-193a-5p;NC_000014.9_29046;hsa-miR-27a-3p;hsa-miR-6842-3p;NC_000002.12_3880;hsa-miR-449c-5p;hsa-miR-3929;hsa-miR-4758-3p;hsa-miR-148a-3p;hsa-miR-98-5p;hsa-miR-6511b-5p;NC_000011.10_24785
SUSD4	55061	hsa_circ_0059354	0.266667	7.97728e-21	12	hsa-miR-193a-5p;NC_000014.9_29046;hsa-miR-27a-3p;hsa-miR-9-5p;hsa-miR-22-3p;hsa-miR-3929;hsa-miR-98-5p;NC_000017.11_32431;hsa-miR-22-5p;hsa-miR-215-3p;NC_000011.10_24785;NC_000010.11_22861
THG1L	54974	hsa_circ_0059354	0.311111	7.97728e-21	12	NC_000014.9_29046;hsa-miR-27a-3p;hsa-miR-9-5p;NC_000002.12_3880;hsa-miR-449c-5p;hsa-miR-98-5p;hsa-miR-148a-3p;hsa-miR-6511b-5p;hsa-miR-22-5p;hsa-miR-215-3p;NC_000010.11_22861;hsa-miR-4443
FIGN	55137	hsa_circ_0014557	0.736842	7.99736e-21	12	hsa-miR-30d-5p;hsa-miR-27a-3p;hsa-miR-6842-3p;hsa-miR-9-5p;NC_000002.12_3880;hsa-miR-98-5p;NC_000017.11_32431;NC_000017.11_32431*;hsa-miR-181a-5p;hsa-miR-6511b-5p;hsa-miR-22-5p;NC_000011.10_23882
GALNT5	11227	hsa_circ_0045194	0.842105	8.01364e-21	15	NC_000012.12_25887;NC_000020.11_35116;hsa-miR-26a-1-3p;NC_000003.12_9133;NC_000022.11_36437;hsa-miR-510-5p;hsa-miR-302b-5p;hsa-miR-7-5p;hsa-miR-92a-1-5p;hsa-miR-3143;hsa-miR-526b-5p;hsa-miR-205-5p;NC_000007.14_17821;hsa-miR-3662;NC_000006.12_15769
SP100	6672	hsa_circ_0038178	0.571429	8.4069e-21	12	hsa-miR-27a-3p;hsa-miR-24-3p;hsa-miR-6842-3p;hsa-miR-181c-5p;NC_000002.12_3880;hsa-miR-9-5p;hsa-miR-3929;hsa-miR-664a-5p;NC_000017.11_32431;hsa-miR-181a-5p;hsa-miR-22-5p;hsa-miR-4443
RAD54L	8438	hsa_circ_0038178	0.428571	8.4069e-21	12	hsa-miR-27a-3p;hsa-miR-24-3p;hsa-miR-6842-3p;hsa-miR-181c-5p;hsa-miR-3929;hsa-miR-4435;hsa-miR-664a-5p;NC_000017.11_32431;hsa-miR-6511b-5p;hsa-miR-642a-5p;hsa-miR-22-5p;hsa-miR-4443
ROR1	4919	hsa_circ_0038178	0.5	8.4069e-21	12	hsa-miR-27a-3p;hsa-miR-6842-3p;hsa-miR-181c-5p;hsa-miR-9-5p;NC_000002.12_3880;hsa-miR-3929;hsa-miR-4435;hsa-miR-664a-5p;NC_000012.12_26540;hsa-miR-181a-5p;hsa-miR-22-5p;hsa-miR-4443
CTH	1491	hsa_circ_0059713	0.439024	8.59537e-21	17	NC_000023.11_36905;NC_000021.9_35751;hsa-miR-7974;hsa-miR-526b-5p;NC_000016.10_31157;NC_000003.12_9133;hsa-miR-20a-5p;NC_000011.10_25384;hsa-miR-373-5p;NC_000018.10_33504*;hsa-miR-582-5p;NC_000003.12_7276;NC_000009.12_21925;NC_000006.12_15769;hsa-miR-205-5p;hsa-miR-3529-3p;hsa-miR-3662
EGFR	1956	hsa_circ_0059713	0.512195	8.59537e-21	17	NC_000023.11_36905;hsa-miR-3662;hsa-miR-526b-5p;hsa-miR-573;hsa-miR-20a-5p;NC_000011.10_25384;NC_000010.11_23646;NC_000022.11_36437;hsa-miR-373-5p;hsa-miR-7-5p;hsa-miR-582-5p;NC_000009.12_21925;NC_000002.12_3238;hsa-miR-205-5p;hsa-miR-372-5p;hsa-miR-34c-5p;NC_000006.12_15769
SLC1A2	6506	hsa_circ_0068582	0.678571	8.9723e-21	11	hsa-miR-30d-5p;NC_000003.12_9115;hsa-miR-27a-3p;hsa-miR-24-3p;hsa-miR-9-5p;NC_000016.10_31213;hsa-miR-664a-5p;hsa-miR-98-5p;hsa-miR-203a-3p;hsa-miR-22-5p;NC_000011.10_24785
DAB2	1601	hsa_circ_0012566	0.56	9.11617e-21	12	hsa-miR-499a-5p;hsa-miR-193a-5p;hsa-miR-9-5p;hsa-miR-22-3p;hsa-miR-664a-5p;hsa-miR-203a-3p;hsa-miR-22-5p;hsa-miR-6511b-5p;NC_000010.11_22861;NC_000008.11_18787;NC_000011.10_23882;NC_000009.12_21531
RASGEF1B	153020	hsa_circ_0012566	0.56	9.11617e-21	12	hsa-miR-30d-5p;hsa-miR-193a-5p;NC_000003.12_9115;hsa-miR-24-3p;hsa-miR-9-5p;hsa-miR-22-3p;hsa-miR-664a-5p;hsa-miR-203a-3p;hsa-miR-6511b-5p;NC_000008.11_18787;NC_000011.10_23882;NC_000009.12_21531
KIF2C	11004	hsa_circ_0012566	0.52	9.11617e-21	12	hsa-miR-193a-5p;hsa-miR-21-5p;hsa-miR-24-3p;hsa-miR-181c-5p;hsa-miR-22-3p;hsa-miR-449c-5p;hsa-miR-664a-5p;hsa-miR-181a-5p;hsa-miR-6511b-5p;hsa-miR-22-5p;NC_000010.11_22861;NC_000009.12_21531
MX2	4600	hsa_circ_0012566	0.48	9.11617e-21	12	hsa-miR-499a-5p;hsa-miR-21-5p;NC_000003.12_9115;NW_003315954.1_39634;hsa-miR-181c-5p;hsa-miR-22-3p;hsa-miR-449c-5p;hsa-miR-9-5p;hsa-miR-181a-5p;hsa-miR-6511b-5p;hsa-miR-22-5p;NC_000008.11_18787
ACPP	55	hsa_circ_0052203	0.416667	9.11617e-21	12	hsa-miR-26b-5p;hsa-miR-6842-3p;hsa-miR-6807-5p;NC_000002.12_3880;hsa-miR-449c-5p;hsa-miR-3929;hsa-miR-4435;hsa-miR-98-5p;NC_000017.11_32431*;NC_000011.10_24785;hsa-miR-4443;NC_000009.12_21531
SPTLC3	55304	hsa_circ_0052203	0.333333	9.11617e-21	12	hsa-miR-6842-3p;hsa-miR-181c-5p;hsa-miR-3929;hsa-miR-98-5p;hsa-miR-148a-3p;NC_000017.11_32431*;hsa-miR-6511b-5p;hsa-miR-642a-5p;hsa-miR-22-5p;NC_000011.10_24785;NC_000010.11_22861;NC_000020.11_34751
[truncated: 14,170 more rows]
